# Supplementary material for: A novel type of donor–acceptor cyclopropane with fluorine as the donor: (3 + 2)-cycloadditions with carbonyls
Source: Royal Society of Chemistry journal article supplement (doi:10.1039/d2sc00302c), 2022-01-01

# A novel type of donor-acceptor cyclopropanes with fluorine as donor: (3+2)-cycloadditions with carbonyls

Haidong Liu,<sup>a</sup> Lifang Tian,<sup>a</sup> Hui Wang,<sup>a</sup> Zhi-Qiang Li,<sup>a</sup> Chi Zhang,<sup>a</sup> Fei Xue,<sup>b</sup> and Chao Feng<sup>\*a</sup>

<sup>a</sup>Technical Institute of Fluorochemistry (TIF), Institute of Advanced Synthesis (IAS), School of Chemistry and Molecular Engineering, Nanjing Tech University, Nanjing 211816, P. R. China.

<sup>b</sup>Institute of Material Physics & Chemistry, College of Science, Nanjing Forestry University, Nanjing 210037, China

[iamcfeng@njtech.edu.cn](mailto:iamcfeng@njtech.edu.cn)

## Table of Contents

|                                    |     |
|------------------------------------|-----|
| 1. General Information.....        | S1  |
| 2. Preparation of Substrates ..... | S2  |
| 3. Reaction Optimization .....     | S11 |
| 4. General Procedures .....        | S18 |
| 5. DFT Study .....                 | S20 |
| 6. Compound Data of Products.....  | S32 |
| 7. References: .....               | S57 |

## 1. General Information

Unless otherwise noted, all reactions were carried out under dry nitrogen atmosphere.  $\text{AlCl}_3$  (Energy Chemical),  $\text{In}(\text{OTf})_3$  (Bidepharm),  $\text{FSO}_2\text{CF}_2\text{CO}_2\text{SiMe}_3$  (Shang Fluoro). All commercial reagents were used directly without further purification. All solvent dried by passage through a column of neutral alumina under nitrogen prior to use. Organic solutions were concentrated under reduced pressure on an IKA RV 10 rotary evaporator. Flash chromatography was performed using Huanghai flash silica gel (200–300 mesh). Thin-layer chromatography (TLC) was performed on Silicycle 250  $\mu\text{m}$  silica gel plates visualized under UV light (254 nm).

HRMS spectra were recorded on a Xevo G2-XS QToF (Waters Corporation). The NMR spectra were recorded using JEOL 400 MHz Fourier-transform NMR spectrometer. Chemical shifts were reported as  $\delta$  in units of parts per million (ppm) downfield from  $\text{SiMe}_4$  ( $\delta$  0.0). Multiplicities were given as: s (singlet); d (doublet); t (triplet); q (quartet); dd (doublet of doublets); dt (doublet of triplets); m (multiplet) and etc. Coupling constants are reported as a J value in Hz. IR spectra were recorded on a NICOLET IS10 (Thermo Fisher Scientific).

## 2. Preparation of Substrates

### Scheme S1. Structure of Trifluoromethyl Alkenes

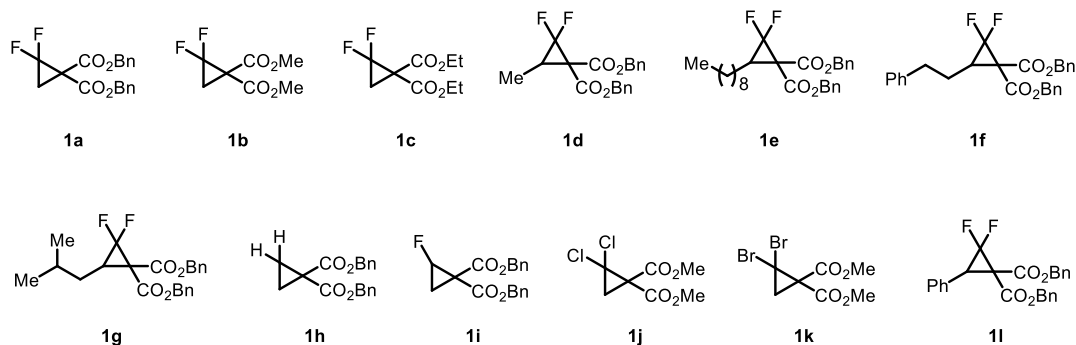

#### General Procedure A: Preparation of gem-Difluorocyclopropanes (**1a-1c**).

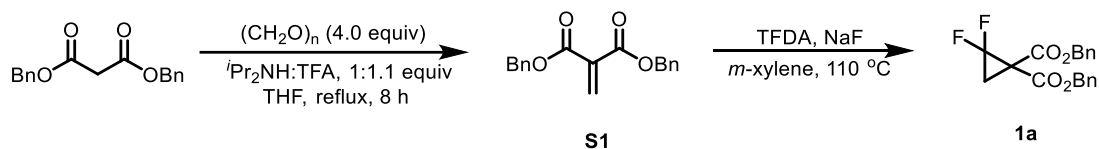

**Dibenzyl 2-methylenemalonate (S1)** was prepared by a modified reported procedure.<sup>1</sup> To a 250 mL round bottom flask equipped with a stir bar were added dibenzyl malonate (1.0 equiv, 10 mmol, 2.84 g), paraformaldehyde (2.0 equiv, 20 mmol, 0.6 g), Diisopropylamine (10 mmol, 1.0 equiv, 1.4 mL), trifluoroacetic acid (11 mmol, 1.1 equiv, 0.82 mL) and dry THF (100 mL). The reaction mixture was stirred, open to the atmosphere, at reflux for 2 h. The mixture would become clear, then the reaction mixture was cooled down to room temperature and a second addition of paraformaldehyde (2.0 equiv, 20 mmol, 0.6 g) was performed. Next, the reaction mixture was stirred at reflux for an additional 6 h open to the atmosphere. The reaction mixture was cooled down and the solvent was removed under reduced pressure, dissolved in Et<sub>2</sub>O and washed with brine. The solution mixture was dried (Na<sub>2</sub>SO<sub>4</sub>) and concentrated under vacuum to get the **S1** as a clear liquid (90% yield) which was carried on directly to the next step. (*Note: purification of this compound led to extensive loss of material on silica*).

**Dibenzyl 2,2-difluorocyclopropane-1,1-dicarboxylate (1a)** was prepared by a modified reported procedure.<sup>2</sup> Under N<sub>2</sub> atmosphere, to a 50 mL two neck round bottom flask equipped with a stir bar were added NaF (20 mol%, 1.8 mmol, 76 mg), dibenzyl 2-methylenemalonate (**S1**, 9 mmol, 1.0 equiv, 2.67 g) and m-xylene (0.5 mL). The mixture was heated to 110 °C and stirred for 5 min. TFDA (FSO<sub>2</sub>CF<sub>2</sub>CO<sub>2</sub>SiMe<sub>3</sub>, 18 mmol) was added dropwise in 15 min. Then the mixture was stirred for further 30 min at 110 °C. When the substrate was completely converted detected by TLC, the mixture was cooled to room temperature. After removal of the solvent under reduced pressure, the residue was subjected to column chromatography (Petroleum ether/EtOAc = 50 : 1, TLC R<sub>f</sub> = 0.20, CAM solution, UV) to afford the pure product **1a** (2.31 g, 6.7 mmol, 74% yield) as a colorless oil.

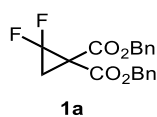

<sup>1</sup>H NMR (401 MHz, CDCl<sub>3</sub>) δ 7.27 – 7.23 (m, 6H), 7.23 – 7.19 (m, 4H), 5.13 (s, 4H), 2.27 (t, J = 9.3 Hz, 2H)

ppm.

$^{13}\text{C}$  NMR (101 MHz,  $\text{CDCl}_3$ )  $\delta$  163.4, 134.7, 128.5, 128.4, 128.1, 109.2 (t,  $J = 291.6$  Hz), 68.1, 39.0 (t,  $J = 11.6$  Hz), 21.5 (t,  $J = 9.9$  Hz) ppm.

$^{19}\text{F}$  NMR (377 MHz,  $\text{CDCl}_3$ )  $\delta$  -131.74 (t,  $J = 9.3$  Hz, 2F) ppm.

HRMS (ESI, m/z): calculated for  $\text{C}_{19}\text{H}_{16}\text{F}_2\text{NaO}_4^+$  [M+Na] $^+$ : 369.0914, found: 369.0910.

IR (film)  $\nu_{\text{max}}$  3035, 1743, 1499, 1447, 1380, 1274, 1116, 977, 913, 750, 697  $\text{cm}^{-1}$ .

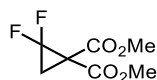

**1b**

dimethyl 2,2-difluorocyclopropane-1,1-dicarboxylate (**1b**) was prepared from dimethyl malonate (1.0 equiv, 10 mmol, 1.3 g) according to the *general procedure A*. **1b** was obtained as a colorless oil (47% yield over two steps) after flash chromatography (Petroleum ether/EtOAc = 50 : 1, TLC Rf = 0.20, 10% phosphomolybdic acid hydrate in EtOH solution);

$^1\text{H}$  NMR (401 MHz,  $\text{CDCl}_3$ )  $\delta$  3.81 (s, 6H), 2.32 (t,  $J = 9.3$  Hz, 2H) ppm;

$^{13}\text{C}$  NMR (101 MHz,  $\text{CDCl}_3$ )  $\delta$  164.0, 109.1 (t,  $J = 291.3$  Hz), 53.4, 38.8 (t,  $J = 11.7$  Hz), 21.5 (t,  $J = 9.9$  Hz) ppm;

$^{19}\text{F}$  NMR (377 MHz,  $\text{CDCl}_3$ )  $\delta$  -132.12 (t,  $J = 9.3$  Hz, 3F) ppm;

HRMS (ESI, m/z): calculated for  $\text{C}_7\text{H}_8\text{F}_2\text{NaO}_4^+$  [M+Na] $^+$ : 217.0288, found: 217.0279.

IR (film)  $\nu_{\text{max}}$  2957, 1743, 1438, 1276, 1163  $\text{cm}^{-1}$ .

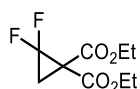

**1c**

diethyl 2,2-difluorocyclopropane-1,1-dicarboxylate (**1c**): was prepared from diethyl malonate (1.0 equiv, 10 mmol, 1.6 g) according to the *general procedure A*. **1c** was obtained as a colorless oil (50% yield over two steps) after flash chromatography (Petroleum ether/EtOAc = 50 : 1, TLC Rf = 0.20, 10% phosphomolybdic acid hydrate in EtOH solution);

$^1\text{H}$  NMR (401 MHz,  $\text{CDCl}_3$ )  $\delta$  4.21 (qd,  $J = 7.1, 1.3$  Hz, 5H), 2.23 (t,  $J = 9.2$  Hz, 2H), 1.24 (t,  $J = 7.2$  Hz, 6H) ppm.

$^{13}\text{C}$  NMR (101 MHz,  $\text{CDCl}_3$ )  $\delta$  163.5, 109.1 (t,  $J = 290.9$  Hz), 62.4, 38.9 (t,  $J = 11.5$  Hz), 21.1 (t,  $J = 10.0$  Hz), 13.7 ppm.

$^{19}\text{F}$  NMR (377 MHz,  $\text{CDCl}_3$ )  $\delta$  -132.53 (t,  $J = 9.4$  Hz, 2F) ppm.

HRMS (ESI, m/z): calculated for  $\text{C}_9\text{H}_{12}\text{F}_2\text{NaO}_4^+$  [M+Na] $^+$ : 245.0601, found: 245.0602.



IR (film)  $\nu_{\max}$  2986, 1739, 1447, 1371, 1259, 1176, 1033  $\text{cm}^{-1}$ .

**General Procedure B: Preparation of gem-Difluorocyclopropanes (1d-1g).**

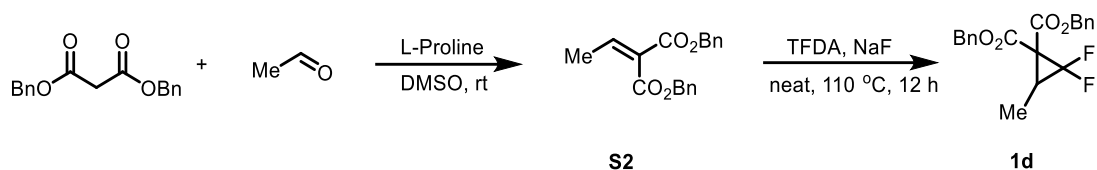

**dibenzyl 2-ethylidenemalonate(S2).** To an over dried 50 mL round-bottom flask under  $\text{N}_2$  was charged with anhydrous DMSO (6 mL), L-Proline (0.15 g, 1.3 mmol), and acetaldehyde (5.0 M in THF, 12.0 mmol, 1.2 equiv). The suspension was stirred for 5 minutes after which dimethylmalonate (10 mmol, 1.0 equiv) was added. After 18 h, the reaction was diluted with ethyl acetate (30 mL) and washed with water (2\*30 mL), dried over sodium sulfate and concentrated in vacuo. The desire product **S2** was obtained after column chromatography as a colorless oil. The analytical data obtained matched those reported in the literature.<sup>3</sup>

**dibenzyl 2,2-difluoro-3-methylcyclopropane-1,1-dicarboxylate (1d)** was prepared by a modified reported procedure. Under  $\text{N}_2$  atmosphere, to a 50 mL two neck round bottom flask equipped with a stir bar were added NaF (20 mol%), dibenzyl 2-ethylidenemalonate (**S2**, 1.0 equiv, 5.0 mmol). The mixture was heated to 110 °C and stirred for 5 min. TFDA ( $\text{FSO}_2\text{CF}_2\text{CO}_2\text{SiMe}_3$ , 2.0 equiv, 10.0 mmol) was added dropwise in 15 min and the mixture was stirred for further 15 h at 110 °C. Then the mixture was cooled to room temperature and the reaction mixture was subjected to column chromatography directly (Petroleum ether/EtOAc = 50 : 1, TLC Rf = 0.25, CAM solution, UV) to afford the pure product **1d** (0.36 g, 1.0 mmol, 20% yield) as a colorless oil.

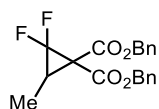

**1d**

**$^1\text{H}$  NMR (401 MHz,  $\text{CDCl}_3$ )**  $\delta$  7.34 – 7.29 (m, 6H), 7.28 – 7.23 (m, 4H), 5.21 – 5.12 (m, 4H), 2.65 (dq,  $J$  = 13.5, 6.7, 4.0 Hz, 1H), 1.22 (dd,  $J$  = 6.8, 1.9 Hz, 3H) ppm;

**$^{13}\text{C}$  NMR (101 MHz,  $\text{CDCl}_3$ )**  $\delta$  164.0, 162.4, 134.8 (d,  $J$  = 9.0 Hz), 128.6, 128.5, 128.5, 128.4, 128.1, 110.4 (dd,  $J$  = 295.1, 292.3 Hz), 68.1, 67.7, 41.7 (dd,  $J$  = 13.1, 9.9 Hz), 27.9 (t,  $J$  = 10.0 Hz), 6.9 (d,  $J$  = 5.1 Hz) ppm;

**$^{19}\text{F}$  NMR (377 MHz,  $\text{CDCl}_3$ )**  $\delta$  -131.02 (dd,  $J$  = 154.0, 13.5 Hz), -141.15 (dd,  $J$  = 154.1, 3.7 Hz, 2F) ppm.

**HRMS (ESI, m/z):** calculated for  $\text{C}_{20}\text{H}_{18}\text{F}_2\text{NaO}_4^+$  [ $\text{M}+\text{Na}$ ] $^+$ : 383.1071, found: 383.1078.

IR (film)  $\nu_{\max}$  2960, 1739, 1499, 1455, 1380, 1166, 750, 698  $\text{cm}^{-1}$ .

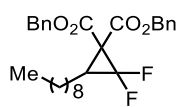

**1e**

**dibenzyl 2,2-difluoro-3-nonylcyclopropane-1,1-dicarboxylate (1e)** was prepared from dibenzyl malonate (1.0 equiv, 10 mmol, 2.84 g) and decanal (1.2 equiv, 12 mmol, 1.87 g) according to the *general procedure B*. **1e** was obtained as a colorless oil (15% yield over two steps) after flash chromatography (Petroleum ether/EtOAc = 50 : 1, TLC R<sub>f</sub> = 0.25, CAM solution, UV);

<sup>1</sup>H NMR (401 MHz, CDCl<sub>3</sub>) δ 7.35 – 7.26 (m, 8H), 7.13 (d, *J* = 7.9 Hz, 2H), 7.07 (d, *J* = 8.1 Hz, 2H), 6.99 (d, *J* = 7.4 Hz, 2H), 6.00 (d, *J* = 2.7 Hz, 1H), 5.25 (d, *J* = 12.0 Hz, 1H), 5.14 (d, *J* = 12.0 Hz, 1H), 4.75 (d, *J* = 12.1 Hz, 1H), 4.38 (d, *J* = 12.1 Hz, 1H), 3.53 – 3.40 (m, 1H), 2.32 (s, 3H), 1.41 – 1.14 (m, 16H), 0.89 (t, *J* = 6.9 Hz, 3H) ppm;

<sup>13</sup>C NMR (101 MHz, CDCl<sub>3</sub>) δ 164.1, 162.5, 134.8 (d, *J* = 4.1 Hz), 128.6, 128.5, 128.5, 128.4, 128.0, 110.4 (q, *J* = 294.8, 292.9 Hz), 68.1, 67.6, 41.8 (dd, *J* = 13.0, 9.3 Hz), 33.0 (t, *J* = 9.4 Hz), 31.8, 29.4, 29.3, 29.3, 28.9, 28.1, 22.7, 22.3 (d, *J* = 2.6 Hz), 14.1 ppm;

<sup>19</sup>F NMR (377 MHz, CDCl<sub>3</sub>) δ -129.77 (ddd, *J* = 154.6, 13.7, 3.6 Hz, 1F), -141.17 (dd, *J* = 154.6, 4.2 Hz 1F) ppm;

**HRMS (ESI, m/z):** calculated for C<sub>28</sub>H<sub>34</sub>F<sub>2</sub>NaO<sub>4</sub><sup>+</sup> [M+H]<sup>+</sup>: 357.1853, found: 357.1847.

**IR (film)** ν<sub>max</sub> 2927, 2856, 1741, 1499, 1456, 1377, 1262, 1088, 749, 697 cm<sup>-1</sup>.

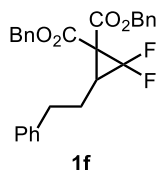

**dibenzyl 2,2-difluoro-3-phenethylcyclopropane-1,1-dicarboxylate (1f)** was prepared from dibenzyl malonate (1.0 equiv, 10 mmol, 2.84 g) and 3-phenylpropanal (1.2 equiv, 12 mmol, 1.6 g) according to the *general procedure B*. **1f** was obtained as a colorless oil (27% yield over two steps) after flash chromatography (Petroleum ether/EtOAc = 50 : 1, TLC R<sub>f</sub> = 0.20, CAM solution, UV);

<sup>1</sup>H NMR (401 MHz, CDCl<sub>3</sub>) δ 7.37 – 7.33 (m, 3H), 7.32 – 7.25 (m, 9H), 7.21 (t, *J* = 7.2 Hz, 1H), 7.11 (d, *J* = 6.9 Hz, 3H), 5.26 – 5.11 (m, 4H), 2.73 (h, *J* = 7.3 Hz, 2H), 2.69 – 2.54 (m, 1H), 2.04 – 1.88 (m, 1H), 1.80 (dq, *J* = 15.0, 8.1 Hz, 1H) ppm;

<sup>13</sup>C NMR (101 MHz, CDCl<sub>3</sub>) δ 163.9, 162.4, 140.1, 134.7 (d, *J* = 1.3 Hz), 128.6, 128.5, 128.5, 128.4, 128.4, 128.0, 126.3, 110.2 (dd, *J* = 295.3, 292.3 Hz), 41.9 (dd, *J* = 13.1, 9.4 Hz), 34.2, 32.3 (t, *J* = 9.3 Hz), 24.3 (d, *J* = 2.3 Hz) ppm;

<sup>19</sup>F NMR (377 MHz, CDCl<sub>3</sub>) δ -129.89 (ddd, *J* = 154.4, 13.5, 3.8 Hz, 1F), -139.74 (dd, *J* = 154.7, 4.6 Hz, 1F) ppm;

**HRMS (ESI, m/z):** calculated for C<sub>27</sub>H<sub>24</sub>F<sub>2</sub>NaO<sub>4</sub><sup>+</sup> [M+Na]<sup>+</sup>: 473.1540, found: 473.1543.

**IR (film)** ν<sub>max</sub> 3032, 1739, 1498, 1455, 1378, 1263, 1166, 1090, 950, 750, 698 cm<sup>-1</sup>.

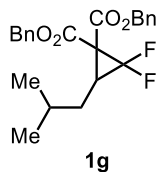

**dibenzyl 2,2-difluoro-3-isobutylcyclopropane-1,1-dicarboxylate (1g)** was prepared from dibenzyl malonate (1.0 equiv, 10 mmol, 2.84 g) and 3-methylbutanal (1.2 equiv, 12 mmol, 1.0 g) according to the *general procedure B*. **1g** was obtained as a colorless oil (15% yield over two steps) after flash chromatography (Petroleum ether/EtOAc = 50 : 1, TLC R<sub>f</sub> = 0.20, CAM solution, UV);

<sup>1</sup>H NMR (401 MHz, CDCl<sub>3</sub>) δ 7.35 – 7.25 (m, 10H), 5.23 – 5.11 (m, 4H), 2.58 (ddt, *J* = 14.1, 9.4, 4.7 Hz, 1H), 1.74 – 1.59 (m, 2H), 1.29 – 1.21 (m, 1H), 0.90 (dd, *J* = 10.1, 6.4 Hz, 6H) ppm;

<sup>13</sup>C NMR (101 MHz, CDCl<sub>3</sub>) δ 164.1, 162.6, 134.8 (d, *J* = 5.1 Hz), 128.6, 128.5, 128.5, 128.0, 110.4 (t, *J* = 294.0 Hz), 68.1, 67.6, 41.6 (dd, *J* = 13.5, 9.7 Hz), 31.7 (t, *J* = 9.5 Hz), 30.7, 27.4, 22.3, 21.5 ppm;

<sup>19</sup>F NMR (377 MHz, CDCl<sub>3</sub>) δ -129.89 (ddd, *J* = 154.4, 13.5, 3.8 Hz, 1F), -139.74 (dd, *J* = 154.7, 4.6 Hz, 1F) ppm;

**HRMS (ESI, m/z):** calculated for C<sub>23</sub>H<sub>24</sub>F<sub>2</sub>NaO<sub>4</sub><sup>+</sup> [M+Na]<sup>+</sup>: 425.1540, found: 425.1542.

**IR (film)** ν<sub>max</sub> 2960, 1740, 1499, 1456, 1377, 1264, 1189, 1143, 1074, 965, 749, 697 cm<sup>-1</sup>.

**General Procedure C: Preparation of dibenzyl cyclopropane-1,1-dicarboxylate (1h)**

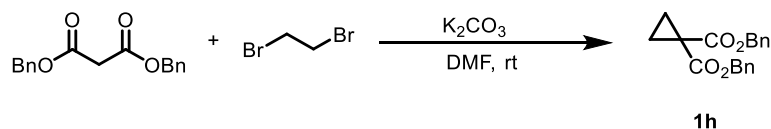

To a solution of dibenzyl malonate (1.0 equiv, 4 mmol, 1.0 g) in DMF (20 mL) was added K<sub>2</sub>CO<sub>3</sub> (9.0 equiv, 36 mmol, 5.0 g) and 1,2-dibromoethane (3.0 equiv, 12 mmol, 1.0 mL). The reaction mixture was stirred at room temperature for 24 h. The reaction was diluted with ethyl acetate (30 mL) and washed with water (2 x 30 mL), dried over sodium sulfate and concentrated in vacuo. The desired product **1h** was obtained after column chromatography (Petroleum ether/EtOAc = 5 : 1, TLC R<sub>f</sub> = 0.30, UV) as a colorless oil (0.96 g, 3.1 mmol, 78% yield).

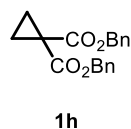

<sup>1</sup>H NMR (401 MHz, CDCl<sub>3</sub>) δ 7.36 – 7.26 (m, 10H), 5.15 (s, 4H), 1.49 (s, 4H) ppm;

<sup>13</sup>C NMR (101 MHz, CDCl<sub>3</sub>) δ 169.7, 135.6, 128.6, 128.3, 128.2, 67.3, 28.3, 17.1 ppm;

**HRMS (ESI, m/z):** calculated for C<sub>19</sub>H<sub>19</sub>O<sub>4</sub><sup>+</sup> [M+H]<sup>+</sup>: 311.1283, found: 311.1288.

**IR (film)** ν<sub>max</sub> 3034, 1731, 1498, 1456, 1383, 1318, 1199, 1128, 751, 697 cm<sup>-1</sup>.

**General Procedure D Preparation of dimethyl 2,2-dichlorocyclopropane-1,1-dicarboxylate (**1i**)**

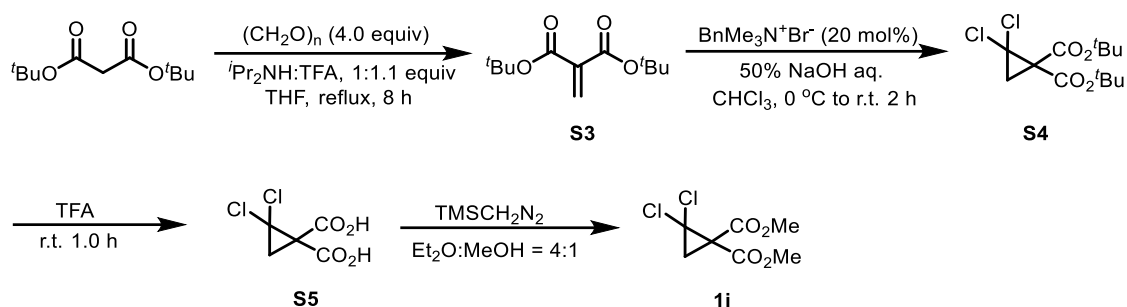

**di-tert-butyl 2-methylenemalonate (S3)** was prepared by a modified reported procedure.<sup>1</sup> To a 250 mL round bottom flask equipped with a stir bar were added di-tert-butyl malonate (1.0 equiv, 10 mmol, 2.84 g), paraformaldehyde (2.0 equiv, 20 mmol, 0.6 g), Diisopropylamine (10 mmol, 1.0 equiv, 1.4 mL), trifluoroacetic acid (11 mmol, 1.1 equiv, 0.82 mL) and dry THF (100 mL). The reaction mixture was stirred, open to the atmosphere, at reflux for 2 h. The mixture would become clear, then the reaction mixture was cooled down to room temperature and a second addition of paraformaldehyde (2.0 equiv, 20 mmol, 0.6 g) was performed. Next, the reaction mixture was stirred at reflux for an additional 6 h open to the atmosphere. The reaction mixture was cooled down and the solvent was removed under reduced pressure, dissolved in Et<sub>2</sub>O and washed with brine. The solution mixture was dried (Na<sub>2</sub>SO<sub>4</sub>) and concentrated under vacuum to get the **S3** as a clear liquid (90% yield) which was carried on directly to the next step. Spectral data matched that previously reported<sup>1</sup>.

**di-tert-butyl 2,2-dichlorocyclopropane-1,1-dicarboxylate (S4)** di-tert-butyl 2-methylenemalonate (**S3**, 2.0 g, 9.0 mmol), chloroform (5.0 mL), benzyltrimethylammonium bromide (0.41 g, 1.8 mmol, 2 mol%) were put in a flask equipped with a magnetic stirrer and thermometer. A 50% solution of sodium hydroxide (1.1 g, 27.0 mmol, 3.0 equiv) was added dropwise with cooling in an ice-salt bath (T < 5 °C). The mixture was stirred for 2.0 h under ambient temperature and quenched with water. The organic layer was separated and washed with water. The aqueous layer was extracted with dichloromethane. The combined organic layers were dried and the solvent was removed in vacuo. The **S4** was obtained after column chromatography (DCM = 100% to DCM/EA = 20 : 1, TLC (DCM) R<sub>f</sub> = 0.15, 10% phosphomolybdic acid hydrate in EtOH solution) as a white solid (0.98 g, 0.34 mmol, 35% yield).

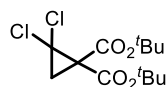

**S4**

<sup>1</sup>H NMR (400 MHz, CDCl<sub>3</sub>) δ 2.19 (s, 1H), 1.50 (s, 9H) ppm;

<sup>13</sup>C NMR (101 MHz, CDCl<sub>3</sub>) δ 163.2 , 83.4 , 59.4 , 44.9 , 30.3 , 27.9 ppm;

HRMS (ESI, m/z): calculated for C<sub>13</sub>H<sub>20</sub>Cl<sub>2</sub>NaO<sub>4</sub><sup>+</sup> [M+Na]<sup>+</sup>: 369.0272, found: 369.0280.

IR (film) ν<sub>max</sub> 2979, 1740, 1728, 1369, 1324, 1288, 1251, 1169, 1128, 843, 760 cm<sup>-1</sup>.

**2,2-dichlorocyclopropane-1,1-dicarboxylic acid (S5)**: Ester **S4** (310 mg, 1.0 mmol) and trifluoroacetic acid (1.0 mL) were allowed to stand for 1.0 h at ambient temperature. The reaction mixture was washed with hexane (5x5.0 mL) to give 2,2-dichlorocyclopropane-1,1-dicarboxylic acid (**S5**) as a sticky solid which was direct used in the next step without further purification.

**dimethyl 2,2-dichlorocyclopropane-1,1-dicarboxylate (1i):** The acid **S5** was dissolved in Et<sub>2</sub>O (8.0 mL) and MeOH (2.0 mL). The mixture was cooled to 0 °C, The Et<sub>2</sub>O solution of TMSCHN<sub>2</sub> (2.0 mmol, 2.0 equiv) was added at 0 °C. The mixture was stirred at 0 °C for 30 min. The volatile was removed under reduced pressure and the crude residue was purified by column chromatography (PE/EA = 20:1. R<sub>f</sub> = 0.27, 10% phosphomolybdic acid hydrate in EtOH solution) to afford the **1i** as a colourless liquid (0.14 g, 60%).

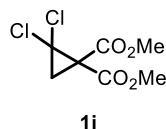

<sup>1</sup>H NMR (400 MHz, CDCl<sub>3</sub>) δ 3.83 (s, 6H), 2.37 (s, 2H) ppm;

<sup>13</sup>C NMR (101 MHz, CDCl<sub>3</sub>) δ 164.5 , 59.4 , 53.6 , 43.6 , 30.9 ;ppm;

HRMS (ESI, m/z): calculated for C<sub>7</sub>H<sub>8</sub>Cl<sub>2</sub>NaO<sub>4</sub><sup>+</sup> [M+Na]<sup>+</sup>: 248.9697, found: 348.9702.

IR (film) ν<sub>max</sub> 2925, 2854, 1743, 1437, 1324, 1291, 1254, 1126, 1054 cm<sup>-1</sup>.

**General Procedure E: Preparation of dimethyl 2,2-dibromocyclopropane-1,1-dicarboxylate (1j)**

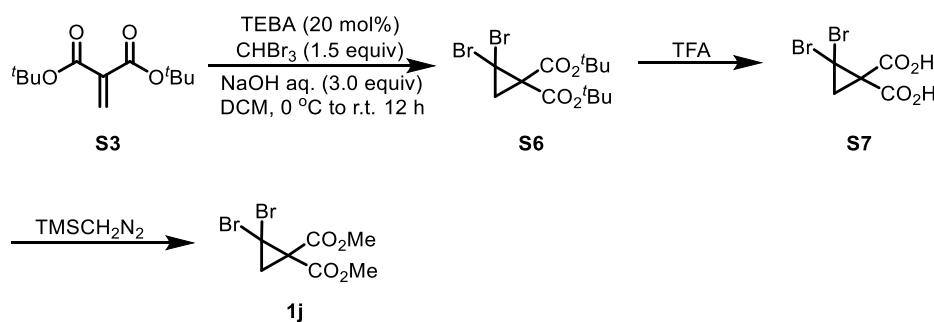

**di-tert-butyl 2,2-dibromocyclopropane-1,1-dicarboxylate (S6):** di-tert-butyl 2-methylenemalonate (2.0 g, 9.0 mmol), bromoform (1.1 mL, 13.5 mmol, 1.5 equiv), Benzyltriethylammonium chloride (TEBA, 0.4 g, 1.8 mmol, 2 mol%) and dichloromethane (20 mL) were put in a flask equipped with a magnetic stirrer and thermometer. A 50% solution of sodium hydroxide (1.1 g, 27.0 mmol, 3.0 equiv) was added dropwise with cooling in an ice-salt bath (T<5 °C). The mixture was stirred for 12 h under ambient temperature and quenched with water. The organic layer was separated and washed with water. The aqueous layer was extracted with dichloromethane. The combined organic layers were dried. The solvent was removed and the residue was crystallised from hexane giving ester **S6** as a colourless solid (0.9 g, 25%). Spectral data matched that previously reported<sup>5</sup>.

**2,2-dibromocyclopropane-1,1-dicarboxylic acid (S7):** Ester **S4** (0.79 g, 2.0 mmol) and trifluoroacetic acid (1.0 mL) were allowed to stand for 1 h at ambient temperature. The product was filtered and washed with hexane to give acid **S7** as a white solid (0.57 mg, 99%). Spectral data matched that previously reported<sup>5</sup>.

**dimethyl 2,2-dibromocyclopropane-1,1-dicarboxylate (1j):** The acid **S7** (0.5 mmol, 0.14 g) was dissolved in Et<sub>2</sub>O (4.0 mL) and MeOH (1.0 mL). The mixture was cooled to 0 °C, The Et<sub>2</sub>O solution of TMSCHN<sub>2</sub> (1.0 mmol, 2.0 equiv) was added at 0 °C. The mixture was stirred at 0 °C for 30 min. The volatile was removed under reduced pressure and the crude residue was purified by column chromatography (PE/EA = 20:1. R<sub>f</sub> = 0.25, UV) to afford the **1j** as a colourless liquid (0.25g, 80%).

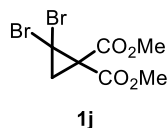

**<sup>1</sup>H NMR (401 MHz, CDCl<sub>3</sub>)** δ 2.32 (s, 2H), 1.52 (s, 18H) ppm;

**<sup>13</sup>C NMR (101 MHz, CDCl<sub>3</sub>)** δ 163.5 , 83.6 , 44.0 , 32.2 , 27.9 , 22.9 ppm;

**HRMS (ESI, m/z):** calculated for C<sub>7</sub>H<sub>8</sub>Br<sub>2</sub>O<sub>4</sub><sup>+</sup> [M+H]<sup>+</sup>: 314.8868, found: 314. 8867.

**IR (film)** ν<sub>max</sub> 2955, 1747, 1436, 1315, 1238, 1123, 1039, 874, 696 cm<sup>-1</sup>.

**General Procedure F Preparation of dibenzyl 2-fluorocyclopropane-1,1-dicarboxylate (1k)**

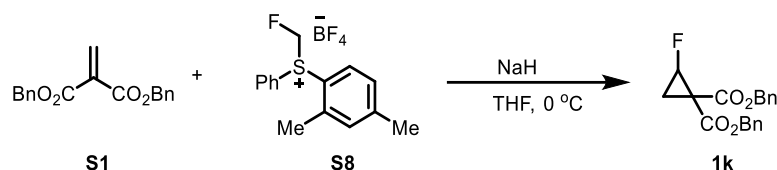

**dibenzyl 2-fluorocyclopropane-1,1-dicarboxylate (1k)** and (2,4-dimethylphenyl)(fluoromethyl)(phenyl)sulfonium tetrafluoroborate (**S8**) was prepared by a reported procedure.<sup>4</sup> To a solution of dibenzyl 2-methylenemalonate (**S1**, 296 mg, 1.0 mmol, 1.0 equiv) in anhydrous THF (100 mL) cooled in ice bath under N<sub>2</sub> atmosphere was added (2,4-dimethylphenyl)(fluoromethyl)(phenyl)sulfonium tetrafluoroborate (**S8**, 668 mg, 2.0 mmol, 2.0 equiv) followed by NaH (60% in mineral oil, 400 mg, 10 mmol, 10 equiv). The reaction mixture was stirred for 15 min at 0 °C. When the substrate was completely converted detected by TLC, the reaction was quenched with water, extracted with EA (15 x 3 mL), dried over sodium sulfate and concentrated in vacuo. The desired product **1k** was obtained after column chromatography (Petroleum ether/EtOAc = 20 : 1, TLC R<sub>f</sub> = 0.15, CAM solution, UV) as a colorless oil (0.11 g, 0.34 mmol, 34% yield).

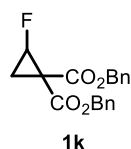

**<sup>1</sup>H NMR (400 MHz, CDCl<sub>3</sub>)** δ 7.36 – 7.26 (m, 10H), 5.28 – 5.01 (m, 5H), 2.24 (ddd, *J* = 22.3, 7.4, 4.2 Hz, 1H), 1.64 (dt, *J* = 13.7, 6.7 Hz, 1H) ppm;

**<sup>13</sup>C NMR (101 MHz, CDCl<sub>3</sub>)** δ 167.6 , 164.4 (d, *J* = 3.2 Hz), 135.1 , 134.9 , 128.6 , 128.5 , 128.4 , 128.3 , 128.1 , 128.1 , 75.1 (d, *J* = 235.5 Hz), 67.9 , 67.5 , 34.4 (d, *J* = 12.5 Hz), 20.3 (d, *J* = 9.1 Hz) ppm;

**<sup>19</sup>F NMR (376 MHz, CDCl<sub>3</sub>)** δ -211.59 (ddd, *J* = 63.4, 22.4, 15.0 Hz) ppm;

**HRMS (ESI, m/z):** calculated for C<sub>19</sub>H<sub>17</sub>FN<sub>2</sub>O<sub>4</sub><sup>+</sup> [M+Na]<sup>+</sup>: 351.1009, found: 351.1014.

**IR (film)** ν<sub>max</sub> 3035, 1738, 1498, 1455, 1381, 1317, 1282, 1215, 1124, 1074, 1027, 750, 697 cm<sup>-1</sup>.

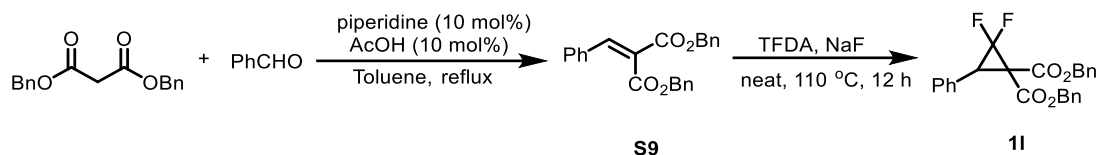

**dibenzyl 2-benzylidenemalonate (S9).** To an over dried 100 mL round-bottom flask was charged with anhydrous toluene (30 mL), dibenzyl malonate (1.0 equiv, 10 mmol, 2.84 g), benzaldehyde (1.0 equiv, 10 mmol, 1.06 g), piperidine (10 mol%, 1 mmol, 85 mg) and glacial acetic acid (10 mol%, 1 mmol, 60 mg). The reaction mixture was refluxed under Dean-Stark condition until water collection ceased. The reaction mixture was then sequentially washed with water, 5% aqueous HCl, saturated aqueous NaHCO<sub>3</sub> and brine. The organic layer was dried over anhydrous Na<sub>2</sub>SO<sub>4</sub> and the solvent was evaporated in vacuo. The desire product **S9** was obtained after column chromatography as a colorless oil. The analytical data obtained matched those reported in the literature.<sup>6</sup>

**dibenzyl 2,2-difluoro-3-phenylcyclopropane-1,1-dicarboxylate (II).** was prepared by a modified reported procedure. Under N<sub>2</sub> atmosphere, to a 50 mL two neck round bottom flask equipped with a stir bar were added NaF (20 mol%) and dibenzyl 2-benzylidenemalonate (**S9**, 1.0 equiv). The mixture was heated to 130 °C and stirred for 5 min. TFDA (FSO<sub>2</sub>CF<sub>2</sub>CO<sub>2</sub>SiMe<sub>3</sub>, 2.0 equiv) was added dropwise in 15 min and the mixture was stirred for further 15 h at 130 °C. Then the mixture was cooled to room temperature and the reaction mixture was subjected to column chromatography directly (Petroleum ether/EtOAc = 50 : 1, TLC R<sub>f</sub> = 0.20, CAM solution, UV) to afford the pure product **II** (0.29 g, 0.7 mmol, 27% yield over two steps) as a colorless oil.

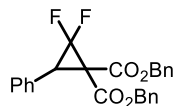

**II**

**<sup>1</sup>H NMR (401 MHz, CDCl<sub>3</sub>)** δ 7.36 – 7.19 (m, 13H), 6.98 (d, *J* = 7.6 Hz, 2H), 5.34 – 5.16 (m, 2H), 4.98 – 4.84 (m, 2H), 3.87 (dd, *J* = 14.3, 3.9 Hz, 1H) ppm;

**<sup>13</sup>C NMR (101 MHz, CDCl<sub>3</sub>)** δ 163.7, 161.8, 134.8, 134.6, 129.3, 128.7, 128.7, 128.6, 128.5, 128.5, 128.2, 109.6 (dd, *J* = 298.0, 291.4 Hz), 68.6, 67.7, 44.7 (dd, *J* = 12.5, 8.0 Hz), 36.3 (dd, *J* = 12.4, 7.9 Hz) ppm;

**<sup>19</sup>F NMR (377 MHz, CDCl<sub>3</sub>)** δ -124.79 (dd, *J* = 158.5, 14.4 Hz, 1F), -138.41 (dd, *J* = 158.4, 3.9 Hz, 1F) ppm;

**HRMS (ESI, m/z):** calculated for C<sub>25</sub>H<sub>20</sub>F<sub>2</sub>NaO<sub>4</sub><sup>+</sup> [M+Na]<sup>+</sup>: 321.0984, found: 321.0992.

**IR (film)** ν<sub>max</sub>, 1741, 1500, 1456, 1436, 1379, 1263, 1090, 971, 747, 697 cm<sup>-1</sup>.

### 3. Reaction Optimization

#### General Procedure for Screening of Unsaturated Systems

To an over dried 10 mL Schlenk tube equipped with a stir bar was added  $\text{AlCl}_3$  (20 mol%, 0.02 mmol, 2.7 mg) and DCE (1.0 mL) in a glove box. Then, the unsaturated systems (1.5 equiv, 0.15 mmol) and dibenzyl 2,2-difluorocyclopropane-1,1-dicarboxylate (1.0 equiv, 0.1 mmol) was added. Then, the reaction mixture was stirred at room temperature for 12 h. After this time, the solvent was removed *in vacuo* by rotary evaporation. The 1-iodo-4-(trifluoromethyl)benzene (0.1 mmol, 27.2 mg) was added to the crude residue and the mixture was dissolved with  $\text{CDCl}_3$ . Then the reaction mixture was analyzed by  $^{19}\text{F}$  NMR.

Table S1. Screening of Unsaturated Systems

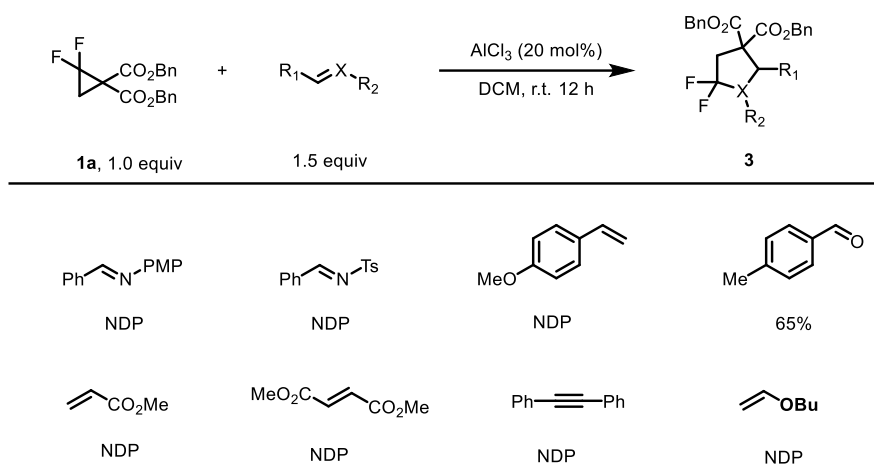

<sup>a</sup> Yields determined by  $^{19}\text{F}$  NMR.



General Procedure for optimization of Lewis acids

To an over dried 10 mL Schlenk tube equipped with a stir bar was added appropriate Lewis acid (20 mol%, 0.02 mmol) and DCM (1.0 mL) in a glove box. The tube was sealed with a cap and then charged with 4-methylbenzaldehyde (1.5 equiv, 0.15 mmol) followed by dibenzyl 2,2-difluorocyclopropane-1,1-dicarboxylate (1.0 equiv, 0.1 mmol) by microinjector. The reaction mixture was stirred at room temperature for 12 h. After 12 h, the solvent was removed *in vacuo* by rotary evaporation. The 1-iodo-4-(trifluoromethyl)benzene (0.1 mmol, 27.2 mg) was added to the crude residue and the mixture was dissolved with CDCl<sub>3</sub>. Then the reaction mixture was analyzed by <sup>19</sup>F NMR.

**Table S2. Screening of Lewis Acids<sup>a</sup>**

| Entry | LA (20 mol%)         | Yield of 3a (%) | Conversion of 1a (%) | Entry | LA (20 mol%)          | Yield of 3a (%) | Conversion of 1a (%) |
|-------|----------------------|-----------------|----------------------|-------|-----------------------|-----------------|----------------------|
| 1     | Sn(OTf) <sub>2</sub> | 0               | 100                  | 13    | MgI <sub>2</sub>      | 0               | 65                   |
| 2     | Zn(OTf) <sub>2</sub> | 11              | 12                   | 14    | TMSOTf                | trace           | 33                   |
| 3     | Yb(OTf) <sub>2</sub> | 34              | 47                   | 15    | BF <sub>3</sub> OEt   | 0               | 40                   |
| 4     | SnCl <sub>2</sub>    | 0               | 100                  | 16    | Ni(OTf) <sub>2</sub>  | 0               | 2                    |
| 5     | AlCl <sub>3</sub>    | 65              | 97                   | 17    | Fe(OTf) <sub>3</sub>  | 14              | 60                   |
| 6     | Cu(OTf) <sub>2</sub> | 6               | 26                   | 18    | TfOH                  | 0               | 15                   |
| 7     | Bi(OTf) <sub>2</sub> | 4               | 52                   | 19    | In(OTf) <sub>3</sub>  | 62              | 100                  |
| 8     | La(OTf) <sub>3</sub> | 0               | 10                   | 20    | Ga(OTf) <sub>3</sub>  | 12              | 35                   |
| 9     | NbCl <sub>5</sub>    | 0               | 100                  | 21    | MgCl <sub>2</sub>     | 0               | 8                    |
| 10    | Eu(OTf) <sub>3</sub> | 7               | 31                   | 22    | Ti(OEt) <sub>4</sub>  | 0               | 7                    |
| 11    | Sc(OTf) <sub>3</sub> | 0               | 100                  | 23    | TiCl <sub>4</sub>     | 0               | 100                  |
| 12    | AgSbF <sub>6</sub>   | 12              | 99                   | 24    | PPh <sub>3</sub> AuCl | 0               | 7                    |

<sup>a</sup> Yields determined by <sup>19</sup>F NMR.

### General Procedure for optimization of equivalent of Lewis acid

To an over dried 10 mL Schlenk tube equipped with a stir bar was added  $\text{AlCl}_3$  in appropriate equivalent and DCM (1.0 mL) in a glove box. The tube was sealed with a cap and then charged with 4-methylbenzaldehyde (1.5 equiv, 0.15 mmol) followed by dibenzyl 2,2-difluorocyclopropane-1,1-dicarboxylate (1.0 equiv, 0.1 mmol) by microinjector. The reaction mixture was stirred at this temperature for 12 h. After this time, the solvent was removed *in vacuo* by rotary evaporation. The 1-iodo-4-(trifluoromethyl)benzene (0.1 mmol, 27.2 mg) was added to the crude residue and the mixture was dissolved with  $\text{CDCl}_3$ . Then the reaction mixture was analyzed by  $^{19}\text{F}$  NMR.

**Table S3. Screening of Equivalent of Lewis Acid<sup>a</sup>**

**1a**, 1.0 equiv      **2a**, 1.5 equiv      **3a**

| Entry | Equivalent of Catalyst (n) | Yield of <b>3a</b> (%) | Conversion of <b>1a</b> (%) |
|-------|----------------------------|------------------------|-----------------------------|
| 1     | 1                          | 0                      | 5                           |
| 2     | 2                          | 0                      | 6                           |
| 3     | 5                          | trace                  | 9                           |
| 4     | 10                         | 56                     | 71                          |
| 5     | 20                         | 65                     | 97                          |
| 6     | 50                         | 33                     | 100                         |

<sup>a</sup> Yields determined by  $^{19}\text{F}$  NMR.

### General Procedure for optimization of solvent and temperature

To an over dried 10 mL Schlenk tube equipped with a stir bar was added AlCl<sub>3</sub> (20 mol%, 0.02 mmol) appropriate Solvent (1.0 mL) in a glove box. The tube was sealed with a cap and the mixture was cooled to appropriate temperature. The tube was then charged with 4-methylbenzaldehyde (1.5 equiv, 0.15 mmol) followed by dibenzyl 2,2-difluorocyclopropane-1,1-dicarboxylate (1.0 equiv, 0.1 mmol) by microinjector. The reaction mixture was stirred at the indicated temperature for 12 h. After this time, the solvent was removed *in vacuo* by rotary evaporation. The 1-iodo-4-(trifluoromethyl)benzene (0.1 mmol, 27.2 mg) was added to the crude residue and the mixture was dissolved with CDCl<sub>3</sub>. Then the reaction mixture was analyzed by <sup>19</sup>F NMR.

**Table S4. Screening of Solvent and Temperature**

Reaction scheme: 1a + 2a (1.5 equiv)  $\xrightarrow[\text{Solvent, r.t. 12 h}]{\text{AlCl}_3 (20 \text{ mol}\%)}$  3a

| Entry | Solvent | T (°C) | Yield of 3a (%) | Conversion of 1a (%) |
|-------|---------|--------|-----------------|----------------------|
| 1     | DCM     | 25     | 65              | 97                   |
| 2     | DCM     | 0      | 77              | 98                   |
| 3     | DCM     | -20    | 82              | 99                   |
| 4     | DCE     | 25     | 52              | 100                  |
| 5     | DCE     | -20    | 95              | 100                  |

<sup>a</sup>Yields determined by <sup>19</sup>F NMR.

### General Procedure for Screening of Other Unsaturated Systems

To an over dried 10 mL Schlenk tube equipped with a stir bar was added AlCl<sub>3</sub> (20 mol%, 0.02 mmol, 2.7 mg) and DCE (1.0 mL) in a glove box. Then, the unsaturated systems (1.5 equiv, 0.15 mmol) and dibenzyl 2,2-difluorocyclopropane-1,1-dicarboxylate (1.0 equiv, 0.1 mmol) was added. Then, the reaction mixture was stirred at room temperature for 12 h. After this time, the solvent was removed *in vacuo* by rotary evaporation. The 1-iodo-4-(trifluoromethyl)benzene (0.1 mmol, 27.2 mg) was added to the crude residue and the mixture was dissolved with CDCl<sub>3</sub>. Then the reaction mixture was analyzed by <sup>19</sup>F NMR.

**Table S5. Screening of Other Unsaturated Systems**

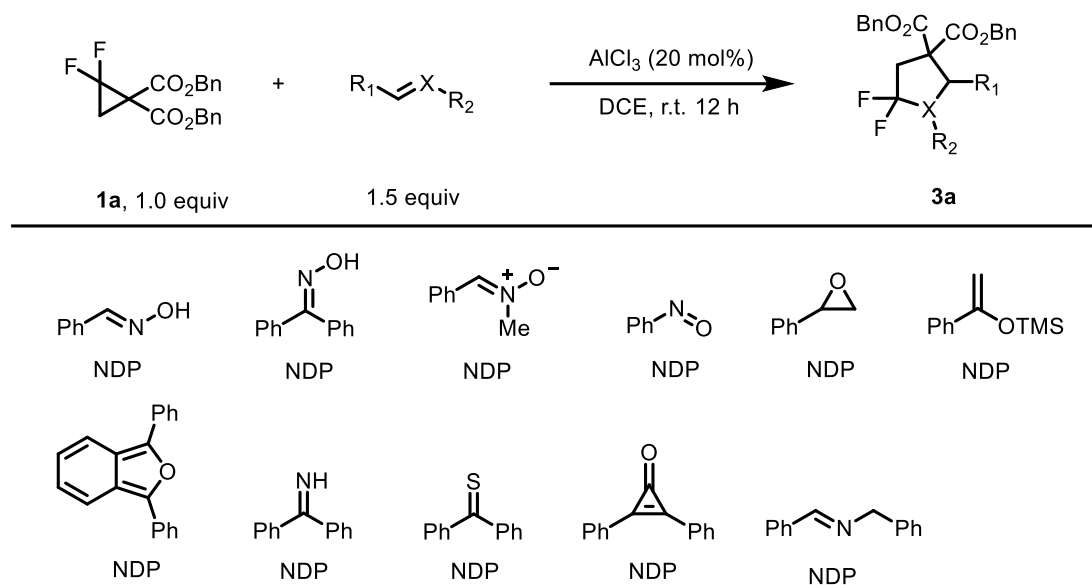

### General Procedure for Enantioselective reaction

To an over dried 10 mL Schlenk tube equipped with a stir bar was added Lewis acid (10 mol%, 0.01 mmol) and solvent (1.0 mL) in a glove box. The reaction mixture was stirred for 10 min. Then, dibenzyl 2,2-difluorocyclopropane-1,1-dicarboxylate **1a** (1.0 equiv, 0.1 mmol) and 4-methylbenzaldehyde **2a** (1.5 equiv, 0.1 mmol) was added. The tube was sealed and stirred at room temperature for 12 h. Then, the solvent was removed *in vacuo* by rotary evaporation. The 1-iodo-4-(trifluoromethyl)benzene (0.1 mmol, 27.2 mg) was added to the crude residue and the mixture was dissolved with CDCl<sub>3</sub>. Then the reaction mixture was analyzed by <sup>19</sup>F NMR.

**Table S6 Screening of Ligand**

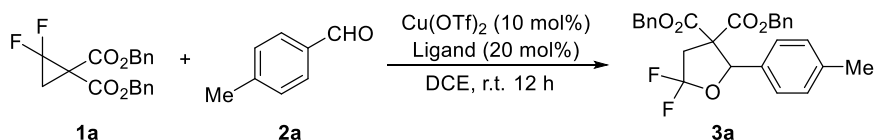

| Entry | Ligand     | Yield(%) | Conversion(%) |
|-------|------------|----------|---------------|
| 1     | -          | 39       | 40            |
| 2     | <b>L1</b>  | 0        | 7             |
| 3     | <b>L2</b>  | 0        | 9             |
| 4     | <b>L3</b>  | 0        | 3             |
| 5     | <b>L4</b>  | 0        | 6             |
| 6     | <b>L5</b>  | 0        | 0             |
| 7     | <b>L6</b>  | 0        | 2             |
| 8     | <b>L7</b>  | 0        | 2             |
| 9     | <b>L8</b>  | 0        | 8             |
| 10    | <b>L9</b>  | 0        | 9             |
| 11    | <b>L10</b> | 0        | 4             |
| 12    | <b>L11</b> | 0        | 0             |

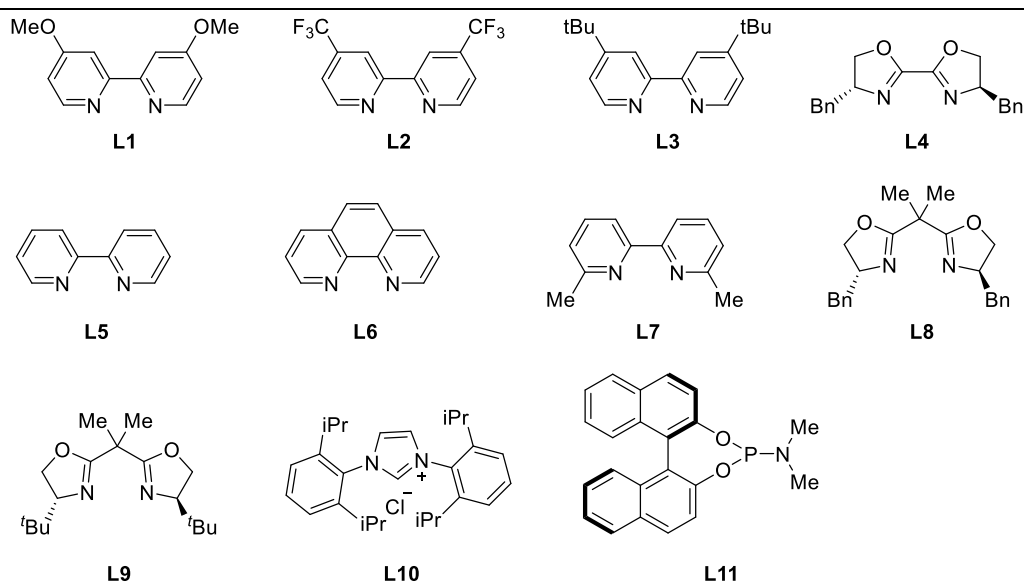



## 4. General Procedures

### General Procedure (GP1): Preparation of *gem*-Difluorotetrahydrofuran Derivatives 3-6

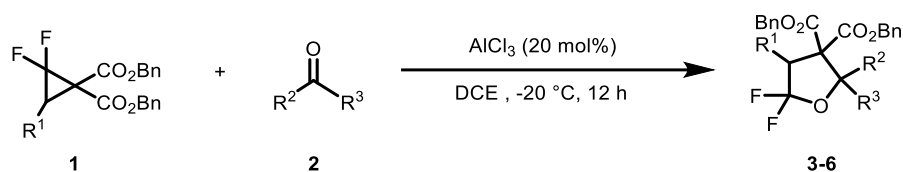

To an over dried 10 mL Schlenk tube equipped with a stir bar was added AlCl<sub>3</sub> (20 mol%, 0.04 mmol, 5.3 mg) and DCE (1.0 mL) in a glove box. The tube was sealed with a cap and the mixture was cooled to -20 °C. The tube was then charged with aldehydes or ketones (1.5 equiv, 0.3 mmol in 0.5 mL DCE) followed by *gem*-difluorocyclopropanes (1.0 equiv, 0.2 mmol in 0.5 mL DCE) by syringe. The reaction mixture was stirred at this temperature for 12 h. After this time, the solvent was removed *in vacuo* by rotary evaporation. The crude residue was further purified by column chromatography on silica gel (Petroleum ether/EtOAc = 50:1 to 5:1) to afford the desired product.

### General Procedure (GP2): Preparation of *gem*-Difluorotetrahydrofuran Derivatives 3-6

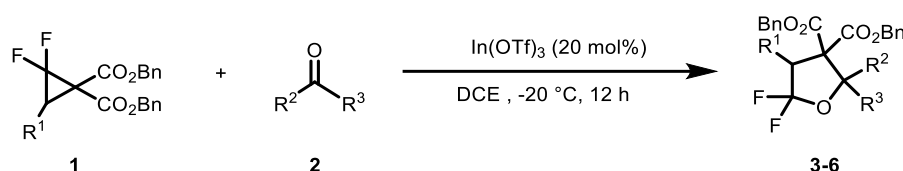

To an over dried 10 mL Schlenk tube equipped with a stir bar was added In(OTf)<sub>3</sub> (20 mol%, 0.04 mmol, 22.5 mg) and DCE (1.0 mL) in a glove box. The tube was sealed with a cap and the mixture was cooled to -20 °C. The tube was then charged with aldehydes or ketones (1.5 equiv, 0.3 mmol in 0.5 mL DCE) followed by *gem*-difluorocyclopropanes (1.0 equiv, 0.2 mmol in 0.5 mL DCE) by syringe. The reaction mixture was stirred at this temperature for 12 h. After this time, the solvent was removed *in vacuo* by rotary evaporation. The crude residue was further purified by column chromatography on silica gel (Petroleum ether/EtOAc = 50:1 to 5:1) to afford the desired product.

### General Procedure (GP3): Preparation of Tetrahydrofuran Derivatives 7-10

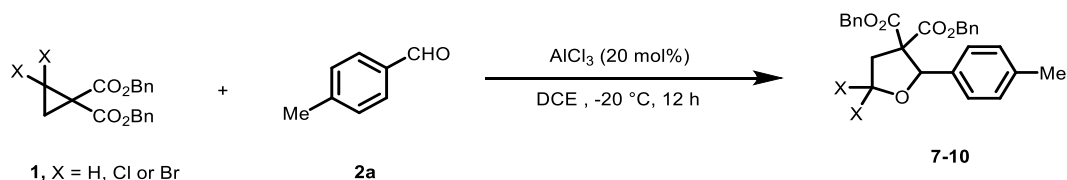

To an over dried 10 mL Schlenk tube equipped with a stir bar was added AlCl<sub>3</sub> (20 mol%, 0.04 mmol, 5.3 mg) and DCE (1.0 mL) in a glove box. The tube was sealed with a cap and the mixture was cooled to -20 °C. The tube was then charged with *p*-Tolualdehyde (1.5 equiv, 0.3 mmol in 0.5 mL DCE) followed by cyclopropanes (1.0 equiv, 0.2 mmol in 0.5 mL DCE) by syringe. The reaction mixture was stirred at this temperature for 12 h. After this time, the solvent was removed *in vacuo* by rotary evaporation. The crude residue was further purified by column chromatography on silica gel (Petroleum ether/EtOAc = 50:1) to afford the desired product.

**General Procedure (GP4): Preparation of gem-Difluorotetrahydrofuran Derivatives 11**

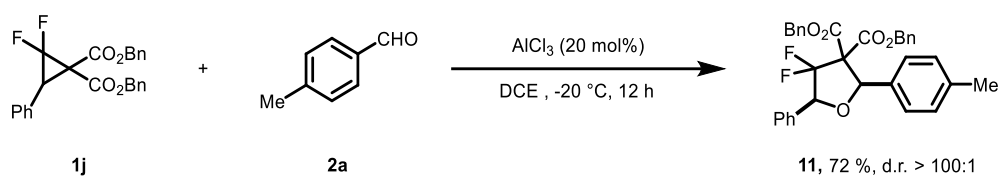

To an over dried 10 mL Schlenk tube equipped with a stir bar was added AlCl<sub>3</sub> (20 mol%, 0.04 mmol, 5.3 mg) and DCE (1.0 mL) in a glove box. The tube was sealed with a cap and the mixture was cooled to -20 °C. The tube was then charged with *p*-Tolualdehyde (1.5 equiv, 0.3 mmol in 0.5 mL DCE) followed by dibenzyl 2,2-difluoro-3-phenylcyclopropane-1,1-dicarboxylate (**1j**, 1.0 equiv, 0.2 mmol in 0.5 mL DCE). The reaction mixture was stirred at this temperature for 12 h. After this time, the solvent was removed *in vacuo* by rotary evaporation. The crude residue was further purified by column chromatography on silica gel (Petroleum ether/EtOAc = 20:1) to afford the desired product **5ja**.



## 5. DFT Study

The DFT calculations were performed with the Gaussian 09 program.<sup>7</sup> Geometries of the minimum energy structures and the transition states were optimized at the B3-LYP level of theory with the 6-31G(d, p) basis set in MeCN implicitly.<sup>8</sup> Harmonic vibrational frequency calculations were performed for all stationary points to confirm whether they are local minima or transition structures, and to derive the thermochemical corrections for the enthalpies and free energies. Solvent effects in CH<sub>2</sub>Cl<sub>2</sub> were considered implicitly using the SMD polarizable continuum model.<sup>9</sup> The single-point energies were obtained using the M06-2X functional with the 6-311G (d, p) basis set with more accurate energy information.<sup>10</sup>

### Scheme S2. DFT Study: Gibbs Free Energy (kcal/mol) Profile for [3+2] Cycloaddition of *gem*-Difluorocyclopropane 1b and Aldehyde 2a

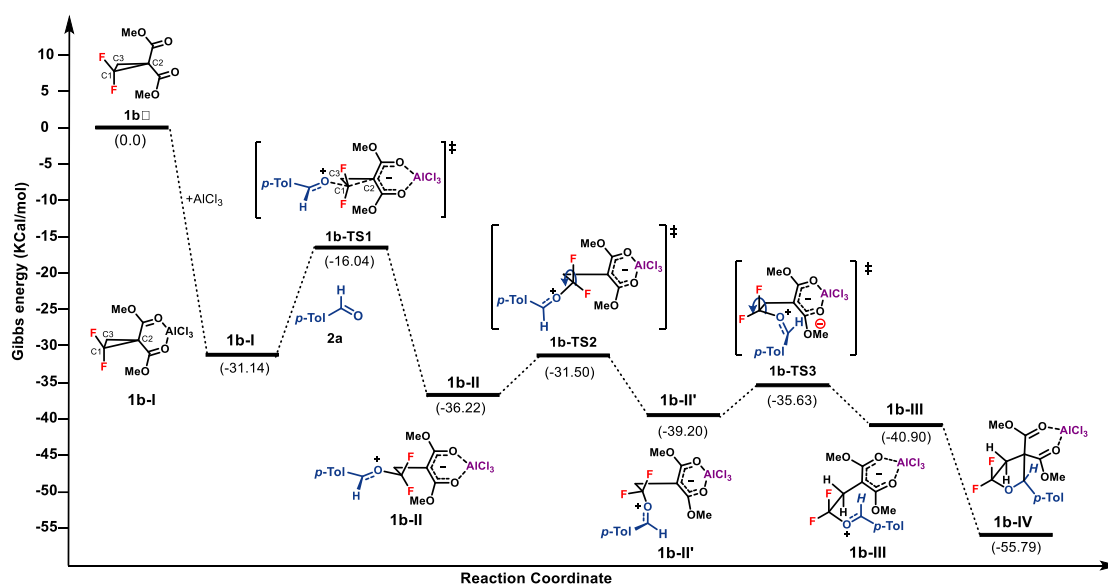

Table S5. The calculated Mulliken charge distribution of the *gem*-difluorocyclopropane 1b

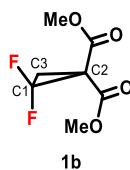

| Atom | value  |
|------|--------|
| C1   | 0.610  |
| C2   | -0.205 |
| C3   | -0.271 |

Table S6. The calculated Mulliken charge distribution of the intermediate 1b-I

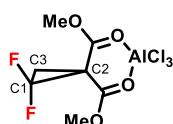

1b-I

| Atom | value  |
|------|--------|
| C1   | 0.649  |
| C2   | -0.270 |
| C3   | -0.240 |

Table S7. The Calculated Mulliken Charge Distribution of the 1b-TS1

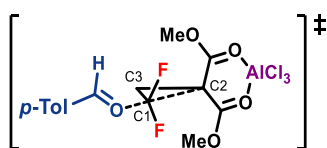

1b-TS1

| Atom | value  |
|------|--------|
| C1   | 0.712  |
| C2   | -0.285 |
| C3   | -0.214 |

Scheme S3. LUMO Orbital of 1b and 1b-I with the Isovalue of 0.1 Atomic Units

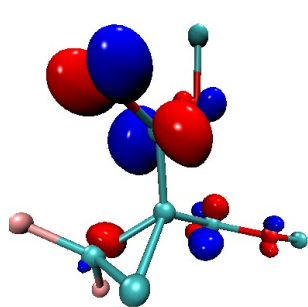

1b

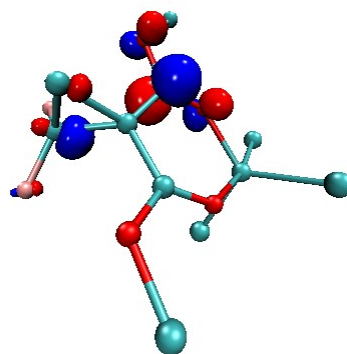

1b-I

Table S8 B3-LYP Calculated Energies, Enthalpies, and Free Energies

| Geometry | $E_{\text{(elec-B3LYP)}}^a$ | $G_{\text{(Corr-B3LYP)}}^b$ | $H_{\text{(Corr-B3LYP)}}^c$ | $E_{\text{(solv-M06)}}^d$ | G from shermo | IF <sup>e</sup> |
|----------|-----------------------------|-----------------------------|-----------------------------|---------------------------|---------------|-----------------|
| 1b       | -772.12403131               | 0.10786                     | 0.16549                     | -772.05448621             | -771.94955630 | -               |
| 2a       | -384.91694252               | 0.10339                     | 0.14646                     | -384.83179625             | -384.73107380 | -               |

|                         |                |          |         |                |                |         |
|-------------------------|----------------|----------|---------|----------------|----------------|---------|
| <b>AlCl<sub>3</sub></b> | -1623.24196790 | -0.02493 | 0.01095 | -1623.22504785 | -1623.25006630 | -       |
| <b>1b-I</b>             | -2395.42490186 | 0.10771  | 0.17902 | -2395.35088227 | -2395.24624210 | -       |
| <b>1b-TS1</b>           | -2780.33660540 | 0.22977  | 0.32658 | -2780.17426519 | -2779.950234   | -299.74 |
| <b>1b-II</b>            | -2780.37261839 | 0.23677  | 0.32940 | -2780.21334222 | -2779.98238620 | -       |
| <b>1b-TS2</b>           | -2780.36676157 | 0.23807  | 0.32837 | -2780.20712432 | -2779.97486630 | -21.43  |
| <b>1b-II'</b>           | -2780.37418279 | 0.23707  | 0.32950 | -2780.21839224 | -2779.98713890 | -       |
| <b>1b-TS3</b>           | -2780.36994498 | 0.23915  | 0.32831 | -2780.21478403 | -2779.98145020 | -17.34  |
| <b>1b-III</b>           | -2780.37691501 | 0.23811  | 0.32931 | -2780.22214567 | -2779.98985640 | -       |
| <b>1b-IV</b>            | -2780.38934716 | 0.24188  | 0.33027 | -2780.24961471 | -2780.01358710 | -       |

Relative energies (kcal/mol) for the studied complexes of at B3LYP/6-311G(d,p) level of theory. <sup>a</sup>The electronic energy calculated by B3-LYP in CH<sub>2</sub>Cl<sub>2</sub>. <sup>b</sup>The thermal correction to Gibbs free energy calculated by B3-LYP in CH<sub>2</sub>Cl<sub>2</sub>. <sup>c</sup>The thermal correction to enthalpy calculated by B3-LYP in CH<sub>2</sub>Cl<sub>2</sub>. <sup>d</sup>The electronic energy calculated by M06 in CH<sub>2</sub>Cl<sub>2</sub>. <sup>e</sup>The B3-LYP calculated imaginary frequencies for the transition states.

### B3-LYP Geometries for All the Optimized Species and Transition State

#### 1b

0 1

|   |             |             |             |
|---|-------------|-------------|-------------|
| C | -0.47438100 | -1.37601200 | 1.35954400  |
| C | -0.16565100 | -0.33182500 | 0.25343500  |
| C | -0.85421600 | -1.64147300 | -0.03259300 |
| H | 0.37089500  | -1.92026600 | 1.76761400  |
| H | -1.26194500 | -1.09096200 | 2.04937900  |
| F | -0.17846100 | -2.57130300 | -0.74323900 |
| F | -2.14885300 | -1.64134300 | -0.41331600 |
| C | -1.02251200 | 0.90714900  | 0.27249800  |
| O | -2.07336300 | 1.00253900  | 0.87094800  |
| O | -0.47275200 | 1.88057300  | -0.46539600 |
| C | 1.25535500  | -0.15254400 | -0.23628900 |
| O | 1.62433700  | -0.35585400 | -1.37206700 |
| O | 2.04471700  | 0.27721500  | 0.75843400  |
| C | -1.20903900 | 3.12362900  | -0.52793700 |
| H | -1.34134300 | 3.53864100  | 0.47356500  |
| H | -0.59991400 | 3.78870900  | -1.13896500 |
| H | -2.18360900 | 2.96412900  | -0.99456300 |
| C | 3.42098600  | 0.53573800  | 0.40020200  |
| H | 3.90443000  | 0.86683400  | 1.31875800  |
| H | 3.89584800  | -0.37409600 | 0.02620500  |

|             |             |             |             |
|-------------|-------------|-------------|-------------|
| H           | 3.47471200  | 1.31707200  | -0.36151100 |
| <b>2a</b>   |             |             |             |
| 0 1         |             |             |             |
| C           | 1.75586200  | -0.06378600 | -0.00770800 |
| C           | 1.16103300  | 1.20619300  | -0.00625700 |
| C           | -0.22550000 | 1.34424900  | -0.00164900 |
| C           | -1.04816000 | 0.20980700  | 0.00020300  |
| C           | -0.46077500 | -1.06737400 | -0.00302000 |
| C           | 0.92065400  | -1.19787100 | -0.00778200 |
| H           | 1.79192300  | 2.09080700  | -0.00899200 |
| H           | -0.67622000 | 2.33387000  | -0.00158000 |
| H           | -1.10475300 | -1.94152700 | -0.00395000 |
| H           | 1.36928500  | -2.18793200 | -0.01255300 |
| C           | -2.51232700 | 0.37121200  | 0.00358000  |
| O           | -3.31708500 | -0.54872100 | 0.00483300  |
| H           | -2.86082800 | 1.42553400  | 0.00548900  |
| C           | 3.25466200  | -0.22217800 | 0.00938100  |
| H           | 3.76154000  | 0.71898400  | -0.21986500 |
| H           | 3.59984300  | -0.55544100 | 0.99620400  |
| H           | 3.58320400  | -0.97604500 | -0.71390200 |
| <b>1b-I</b> |             |             |             |
| 0 1         |             |             |             |
| C           | 3.16144100  | 0.34247800  | -0.83596500 |
| C           | 1.67093900  | 0.15909800  | -0.40334500 |
| C           | 2.86814100  | 0.34911800  | 0.58481300  |
| H           | 3.62372900  | -0.54475900 | -1.25351300 |
| H           | 3.39096300  | 1.29010700  | -1.30991900 |
| F           | 3.17655800  | -0.68885800 | 1.36840600  |
| F           | 2.89553900  | 1.48528600  | 1.29132100  |
| C           | 0.72889500  | 1.29529200  | -0.53957900 |
| O           | -0.50606200 | 1.20083200  | -0.37587800 |
| O           | 1.28328600  | 2.43313300  | -0.82948400 |
| C           | 1.04593400  | -1.19125400 | -0.47893800 |
| O           | -0.16991200 | -1.38261100 | -0.36983500 |
| O           | 1.90024100  | -2.16381500 | -0.66749900 |
| C           | 0.43294300  | 3.62343800  | -0.90761400 |
| H           | -0.07519400 | 3.76912600  | 0.04562100  |
| H           | 1.12344900  | 4.43721200  | -1.11612400 |
| H           | -0.28695500 | 3.49946600  | -1.71677400 |
| C           | 1.37979000  | -3.52721000 | -0.70684600 |
| H           | 2.25905900  | -4.15345900 | -0.84101900 |
| H           | 0.87600000  | -3.75472500 | 0.23305300  |

|    |             |             |             |
|----|-------------|-------------|-------------|
| H  | 0.69284300  | -3.63190300 | -1.54725300 |
| Al | -1.77094800 | -0.16248800 | 0.11619400  |
| Cl | -1.64216100 | -1.08010000 | 2.10315200  |
| Cl | -3.23842500 | 1.45446800  | 0.58875700  |
| Cl | -2.82643500 | -1.13746400 | -1.53165800 |

**1b-TS1**

0 1

|    |             |             |             |
|----|-------------|-------------|-------------|
| C  | 0.43252300  | 0.28462900  | -1.25719400 |
| C  | -1.01202200 | 0.13407800  | -0.78797300 |
| C  | 0.77353900  | 0.21742500  | 0.14088500  |
| H  | 0.79770300  | -0.56185500 | -1.83316200 |
| H  | 0.65603400  | 1.24603500  | -1.71329200 |
| F  | 0.98418200  | -0.89464400 | 0.77247700  |
| F  | 0.81895000  | 1.25030300  | 0.91723100  |
| C  | -1.82275500 | 1.28248500  | -0.53121500 |
| O  | -3.04233400 | 1.25148600  | -0.19315200 |
| O  | -1.21849700 | 2.44566300  | -0.66653500 |
| C  | -1.63789600 | -1.16260800 | -0.71359000 |
| O  | -2.83107400 | -1.35241100 | -0.39712000 |
| O  | -0.84443900 | -2.17946900 | -1.01332300 |
| C  | -1.98036400 | 3.65374900  | -0.38877400 |
| H  | -2.32294900 | 3.64915600  | 0.64668800  |
| H  | -1.27890600 | 4.46795700  | -0.56091400 |
| H  | -2.83008100 | 3.72391800  | -1.06866600 |
| C  | -1.40765600 | -3.51603800 | -0.93082000 |
| H  | -0.58166900 | -4.18255500 | -1.17311500 |
| H  | -1.77547000 | -3.70656900 | 0.07838400  |
| H  | -2.21686200 | -3.62573800 | -1.65430700 |
| Al | -4.29324200 | -0.11416300 | 0.21347700  |
| Cl | -4.13957300 | -1.10551600 | 2.18104500  |
| Cl | -5.74925000 | 1.50203100  | 0.82488500  |
| Cl | -5.52322000 | -0.98639400 | -1.39781900 |
| O  | 3.17189500  | 0.48611800  | -0.21520300 |
| C  | 3.97393500  | -0.25026500 | 0.35978300  |
| C  | 5.42677100  | -0.13982200 | 0.24519600  |
| H  | 3.60960200  | -1.06147200 | 1.01749900  |
| C  | 6.02252900  | 0.84769500  | -0.56255700 |
| C  | 6.24172700  | -1.03398300 | 0.95621100  |
| C  | 7.40327700  | 0.92987500  | -0.65039600 |
| H  | 5.38765100  | 1.53830000  | -1.10861600 |
| C  | 7.62777600  | -0.94372500 | 0.86256300  |
| H  | 5.78453800  | -1.79610800 | 1.58219900  |
| C  | 8.23005200  | 0.03613000  | 0.05970000  |

|   |             |             |             |
|---|-------------|-------------|-------------|
| H | 7.86014100  | 1.69382500  | -1.27392300 |
| H | 8.25321900  | -1.63776700 | 1.41662900  |
| C | 9.72850600  | 0.13579100  | -0.05430700 |
| H | 10.05882400 | -0.10218400 | -1.07281200 |
| H | 10.07273000 | 1.15332900  | 0.16208700  |
| H | 10.23011600 | -0.55072200 | 0.63247200  |

**1b-II**

0 1

|    |             |             |             |
|----|-------------|-------------|-------------|
| C  | -0.68678600 | -0.24749600 | -0.66135100 |
| C  | 0.80222100  | -0.11112800 | -0.49141000 |
| C  | -1.41175600 | -0.34085100 | 0.66827200  |
| H  | -1.10233700 | 0.60985900  | -1.19698500 |
| H  | -0.93821000 | -1.15099400 | -1.22106900 |
| F  | -1.28033000 | 0.76876000  | 1.42285600  |
| F  | -1.03466100 | -1.39058500 | 1.40749200  |
| C  | 1.62950400  | -1.24060700 | -0.42400600 |
| O  | 2.90212800  | -1.23729700 | -0.27044400 |
| O  | 1.02689600  | -2.42594900 | -0.54574800 |
| C  | 1.41955700  | 1.15814200  | -0.37465900 |
| O  | 2.65660100  | 1.36435300  | -0.22595500 |
| O  | 0.59441900  | 2.21040200  | -0.44965800 |
| C  | 1.85130200  | -3.61153600 | -0.50354500 |
| H  | 2.33967100  | -3.70645000 | 0.46844500  |
| H  | 1.16116300  | -4.43992900 | -0.66185800 |
| H  | 2.60489800  | -3.58919900 | -1.29287800 |
| C  | 1.18707700  | 3.52368000  | -0.35488300 |
| H  | 0.35100300  | 4.21909800  | -0.42848000 |
| H  | 1.69890700  | 3.64826000  | 0.60143500  |
| H  | 1.89004000  | 3.69074300  | -1.17371800 |
| Al | 4.15962300  | 0.12322800  | -0.02448600 |
| Cl | 4.49915700  | 0.99714600  | 1.99571800  |
| Cl | 5.74561000  | -1.51363100 | 0.18196700  |
| Cl | 5.10315300  | 1.10759100  | -1.78443300 |
| O  | -2.84022500 | -0.57449800 | 0.46837800  |
| C  | -3.65877200 | 0.42930900  | 0.37049500  |
| C  | -5.02287400 | 0.22601700  | 0.13209300  |
| H  | -3.25476700 | 1.43267600  | 0.49060100  |
| C  | -5.59015400 | -1.07133400 | -0.02404900 |
| C  | -5.85647000 | 1.37498800  | 0.06050500  |
| C  | -6.94249200 | -1.19571800 | -0.24313800 |
| H  | -4.95454600 | -1.94835800 | 0.03109800  |
| C  | -7.21251600 | 1.22718100  | -0.15766800 |
| H  | -5.41913900 | 2.36159800  | 0.18005700  |

|   |             |             |             |
|---|-------------|-------------|-------------|
| C | -7.77865200 | -0.05361500 | -0.31153800 |
| H | -7.38330300 | -2.18027600 | -0.36387900 |
| H | -7.85200900 | 2.10179900  | -0.21121200 |
| C | -9.24943200 | -0.22374900 | -0.53603700 |
| H | -9.43478900 | -0.82954700 | -1.43022100 |
| H | -9.69869300 | -0.76450800 | 0.30626000  |
| H | -9.75982100 | 0.73508000  | -0.64475100 |

**1b-TS2**

0 1

|    |             |             |             |
|----|-------------|-------------|-------------|
| C  | -0.51827300 | 1.37741100  | -0.66786000 |
| C  | 0.83527200  | 0.76233800  | -0.45070700 |
| C  | -1.35025000 | 1.56253200  | 0.61494500  |
| H  | -0.41046000 | 2.37300500  | -1.10025500 |
| H  | -1.11167900 | 0.77703800  | -1.36194900 |
| F  | -1.74143000 | 2.84398100  | 0.79014800  |
| F  | -0.73965800 | 1.16592500  | 1.73409000  |
| C  | 0.96799400  | -0.61467800 | -0.23936400 |
| O  | 2.05989500  | -1.25839500 | -0.04983200 |
| O  | -0.17271900 | -1.31343600 | -0.23210400 |
| C  | 2.01284500  | 1.54638800  | -0.39960700 |
| O  | 3.18333100  | 1.09971700  | -0.23747900 |
| O  | 1.84028100  | 2.86614400  | -0.54186100 |
| C  | -0.08761100 | -2.74374400 | -0.04405200 |
| H  | 0.35376400  | -2.97942800 | 0.92619300  |
| H  | -1.11832600 | -3.09525900 | -0.08644300 |
| H  | 0.50266200  | -3.20359100 | -0.83897100 |
| C  | 3.02288100  | 3.69465000  | -0.52702200 |
| H  | 2.65553400  | 4.71489900  | -0.63686700 |
| H  | 3.55961100  | 3.58477100  | 0.41721700  |
| H  | 3.68330200  | 3.43871800  | -1.35830800 |
| Al | 3.85306500  | -0.72765200 | -0.01898900 |
| Cl | 4.83133800  | -0.03879200 | 1.85932800  |
| Cl | 4.40613900  | -2.93068400 | 0.27037000  |
| Cl | 4.93143000  | -0.48968800 | -1.95110100 |
| O  | -2.55727100 | 0.74072100  | 0.59745000  |
| C  | -3.66246500 | 1.19979000  | 0.09417100  |
| C  | -4.79947800 | 0.38774500  | 0.00191500  |
| H  | -3.68445100 | 2.23257100  | -0.24929100 |
| C  | -4.80931700 | -0.97116200 | 0.42843600  |
| C  | -5.97763800 | 0.96445500  | -0.54378700 |
| C  | -5.96362800 | -1.70979900 | 0.30668600  |
| H  | -3.90946700 | -1.41194100 | 0.84312200  |
| C  | -7.12652900 | 0.20571000  | -0.65579100 |

|   |             |             |             |
|---|-------------|-------------|-------------|
| H | -5.96430800 | 2.00031500  | -0.86842900 |
| C | -7.14201800 | -1.13826500 | -0.23393000 |
| H | -5.97992700 | -2.74643300 | 0.62817400  |
| H | -8.02790000 | 0.64315600  | -1.07207300 |
| C | -8.38565100 | -1.96497600 | -0.34302400 |
| H | -8.19389500 | -2.87166000 | -0.92868500 |
| H | -8.70748900 | -2.29739600 | 0.65149300  |
| H | -9.20337600 | -1.41103900 | -0.80778600 |

**1b-II'**

0 1

|    |             |             |             |
|----|-------------|-------------|-------------|
| C  | 0.01503900  | 2.56978300  | -1.04452400 |
| C  | 0.88704400  | 1.38974700  | -0.70602300 |
| C  | -0.98879500 | 2.92275200  | 0.03451200  |
| H  | 0.61160400  | 3.47409400  | -1.19277700 |
| H  | -0.54627400 | 2.39255600  | -1.96462500 |
| F  | -1.81270900 | 3.92215200  | -0.35085800 |
| F  | -0.42387500 | 3.27092800  | 1.19551200  |
| C  | 0.53747800  | 0.09443500  | -1.09956500 |
| O  | 1.20692900  | -0.97600200 | -0.87996300 |
| O  | -0.61243000 | -0.03139300 | -1.78009200 |
| C  | 2.09896300  | 1.54721300  | 0.01321000  |
| O  | 2.88879200  | 0.61637100  | 0.33612400  |
| O  | 2.40500000  | 2.80345600  | 0.35224000  |
| C  | -0.97753800 | -1.35037700 | -2.24495600 |
| H  | -1.11630600 | -2.03224200 | -1.40409300 |
| H  | -1.91633100 | -1.21168500 | -2.78063300 |
| H  | -0.21558600 | -1.74676000 | -2.91849600 |
| C  | 3.64484900  | 3.01922600  | 1.06013000  |
| H  | 3.67652900  | 4.09095900  | 1.25529300  |
| H  | 3.65531400  | 2.46260800  | 1.99914300  |
| H  | 4.49632500  | 2.72076100  | 0.44495400  |
| Al | 2.77817600  | -1.32321500 | 0.07292900  |
| Cl | 2.66069500  | -1.54881500 | 2.28452600  |
| Cl | 2.45526800  | -3.54204300 | -0.39210300 |
| Cl | 4.77746600  | -1.20977100 | -0.89611100 |
| O  | -1.82726700 | 1.79038200  | 0.41529800  |
| C  | -2.86786800 | 1.48479100  | -0.29896200 |
| C  | -3.66656400 | 0.38348900  | 0.02943700  |
| H  | -3.11290800 | 2.11850400  | -1.15013400 |
| C  | -3.37585900 | -0.47178400 | 1.13095600  |
| C  | -4.80015900 | 0.12304500  | -0.78743600 |
| C  | -4.19705100 | -1.54497500 | 1.38905900  |
| H  | -2.51010100 | -0.27456400 | 1.75346000  |



|   |             |             |             |
|---|-------------|-------------|-------------|
| C | -5.61232800 | -0.95916400 | -0.50973600 |
| H | -5.01860400 | 0.77982800  | -1.62402300 |
| C | -5.32687500 | -1.81054600 | 0.57617500  |
| H | -3.98020300 | -2.20298700 | 2.22454100  |
| H | -6.47873300 | -1.16101300 | -1.13070300 |
| C | -6.19831400 | -2.98962300 | 0.87991100  |
| H | -5.61395300 | -3.91639200 | 0.83056900  |
| H | -6.58896400 | -2.92201700 | 1.90218400  |
| H | -7.03745900 | -3.06747300 | 0.18609700  |

**1b-TS3**

0 1

|    |             |             |             |
|----|-------------|-------------|-------------|
| C  | 0.22597700  | 2.98295500  | 0.89234200  |
| C  | -0.58267400 | 1.75313600  | 0.57345800  |
| C  | 1.55642400  | 3.14907900  | 0.14214700  |
| H  | -0.32778800 | 3.90250100  | 0.67786000  |
| H  | 0.47160700  | 2.99331600  | 1.95497900  |
| F  | 2.47900600  | 3.75647100  | 0.92436900  |
| F  | 1.45043800  | 3.86431200  | -0.98438600 |
| C  | -0.75833000 | 0.72466500  | 1.51070000  |
| O  | -1.45401200 | -0.33796100 | 1.34397900  |
| O  | -0.13860500 | 0.87012000  | 2.69001400  |
| C  | -1.27385100 | 1.62477400  | -0.66179400 |
| O  | -1.99573900 | 0.65142300  | -1.00924900 |
| O  | -1.11697700 | 2.65251300  | -1.49996500 |
| C  | -0.36240900 | -0.13995900 | 3.70078300  |
| H  | -0.03059900 | -1.11946000 | 3.35209900  |
| H  | 0.23178800  | 0.18263200  | 4.55544900  |
| H  | -1.41911100 | -0.18315600 | 3.97099400  |
| C  | -1.79218100 | 2.58406100  | -2.77578400 |
| H  | -1.49605600 | 3.49140700  | -3.30128200 |
| H  | -1.47346200 | 1.70078700  | -3.33248800 |
| H  | -2.87484100 | 2.56205000  | -2.63574800 |
| Al | -2.38333500 | -1.05278000 | -0.11447300 |
| Cl | -1.26224400 | -2.05775900 | -1.75755900 |
| Cl | -2.69419700 | -2.95025700 | 1.12161800  |
| Cl | -4.54211300 | -0.60686600 | -0.38308100 |
| O  | 2.15052700  | 1.91591400  | -0.32521600 |
| C  | 2.39242600  | 0.96094900  | 0.52840800  |
| C  | 2.85108300  | -0.28769300 | 0.09985800  |
| H  | 2.25643900  | 1.16388000  | 1.59012900  |
| C  | 3.03943200  | -0.60832700 | -1.27589200 |
| C  | 3.10874400  | -1.27022800 | 1.09571800  |
| C  | 3.46309500  | -1.86989200 | -1.62351600 |

|   |            |             |             |
|---|------------|-------------|-------------|
| H | 2.84324600 | 0.13940500  | -2.03622400 |
| C | 3.53155200 | -2.53048600 | 0.72463800  |
| H | 2.96859800 | -1.01853700 | 2.14260000  |
| C | 3.70820200 | -2.85564600 | -0.63549600 |
| H | 3.60421300 | -2.12436000 | -2.66913900 |
| H | 3.72393300 | -3.28405100 | 1.48082800  |
| C | 4.12559600 | -4.23319000 | -1.04514000 |
| H | 3.26818000 | -4.76125100 | -1.48319000 |
| H | 4.90084800 | -4.19629900 | -1.81746600 |
| H | 4.48672200 | -4.81802700 | -0.19681400 |

**1b-III**

0 1

|    |             |             |             |
|----|-------------|-------------|-------------|
| C  | 0.02501700  | 2.86657300  | 0.98905600  |
| C  | 0.69969100  | 1.56218600  | 0.66470800  |
| C  | -1.11194600 | 3.23245900  | 0.04791000  |
| H  | -0.39996600 | 2.84683900  | 1.99414300  |
| H  | 0.72777600  | 3.70305800  | 0.93637900  |
| F  | -0.70271600 | 3.42912300  | -1.22329300 |
| F  | -1.76628700 | 4.33255500  | 0.44815100  |
| C  | 1.77109100  | 1.50274900  | -0.24724500 |
| O  | 2.45232700  | 0.46098200  | -0.54295200 |
| O  | 2.09612300  | 2.64625400  | -0.84697000 |
| C  | 0.38169400  | 0.36845200  | 1.36732600  |
| O  | 0.95110800  | -0.74695300 | 1.21776500  |
| O  | -0.61253000 | 0.47463600  | 2.25726300  |
| C  | 3.23854300  | 2.64685400  | -1.73434800 |
| H  | 3.08963600  | 1.94483100  | -2.55652400 |
| H  | 3.29954600  | 3.66709200  | -2.11176900 |
| H  | 4.14772000  | 2.38885600  | -1.18764800 |
| C  | -0.94044800 | -0.70059500 | 3.03186400  |
| H  | -1.77277500 | -0.39837500 | 3.66691700  |
| H  | -1.23809600 | -1.52385500 | 2.38038100  |
| H  | -0.08950900 | -1.00491600 | 3.64452400  |
| Al | 2.41943400  | -1.31868200 | 0.04503800  |
| Cl | 1.00013700  | -2.76593200 | -0.87939400 |
| Cl | 4.12909600  | -1.73145000 | -1.40856300 |
| Cl | 3.52670200  | -1.93158200 | 1.87018300  |
| O  | -2.12986600 | 2.20945900  | 0.03267400  |
| C  | -2.00524000 | 1.19401000  | -0.77601000 |
| C  | -2.86173800 | 0.09058900  | -0.66726400 |
| H  | -1.25429300 | 1.24875600  | -1.56000900 |
| C  | -3.84197600 | -0.02151100 | 0.35961300  |
| C  | -2.72499500 | -0.94613700 | -1.62789700 |

|   |             |             |             |
|---|-------------|-------------|-------------|
| C | -4.65288600 | -1.13272200 | 0.40185000  |
| H | -3.94192600 | 0.76687300  | 1.09745100  |
| C | -3.55163800 | -2.05197700 | -1.56932300 |
| H | -1.96944800 | -0.86049800 | -2.40277100 |
| C | -4.52598500 | -2.16603400 | -0.55921500 |
| H | -5.40340500 | -1.22588200 | 1.18079400  |
| H | -3.44956500 | -2.84437400 | -2.30335500 |
| C | -5.42839000 | -3.35973400 | -0.49032100 |
| H | -5.28704500 | -3.89129500 | 0.45862600  |
| H | -6.47865600 | -3.04669900 | -0.52046000 |
| H | -5.24454400 | -4.05624600 | -1.31020300 |

**1b-IV**

0 1

|   |             |             |             |
|---|-------------|-------------|-------------|
| C | 1.20818200  | 0.91087500  | 0.87707800  |
| O | 1.83672500  | 2.19227500  | 1.00930300  |
| C | 1.79729500  | 2.94405300  | -0.13978700 |
| C | 0.95542600  | 2.21674300  | -1.18619100 |
| C | 0.22619900  | 1.10807500  | -0.39943500 |
| H | 0.59864000  | 0.76269300  | 1.77173800  |
| H | 0.27825800  | 2.90117600  | -1.69556400 |
| H | 1.62661100  | 1.77260200  | -1.91879200 |
| F | 3.07377000  | 3.15968100  | -0.59443300 |
| F | 1.33229200  | 4.18427200  | 0.16968000  |
| C | 0.03573000  | -0.18910100 | -1.17822000 |
| O | -0.89377000 | -0.97872700 | -0.98919800 |
| O | 0.96860300  | -0.41019200 | -2.06422900 |
| C | -1.11316300 | 1.57370300  | 0.15454900  |
| O | -2.09109500 | 0.83873300  | 0.39401200  |
| O | -1.14312500 | 2.83697200  | 0.44071400  |
| C | 0.90839400  | -1.65755300 | -2.82184100 |
| H | -0.04317300 | -1.72159000 | -3.34990600 |
| H | 1.74058300  | -1.59694100 | -3.51985300 |
| H | 1.02965900  | -2.50007500 | -2.14014700 |
| C | -2.34819200 | 3.39316800  | 1.06271700  |
| H | -2.10621200 | 4.43960900  | 1.23248000  |
| H | -3.18786200 | 3.28611800  | 0.37599700  |
| H | -2.54387300 | 2.87261600  | 2.00037800  |
| C | 2.20272900  | -0.22388300 | 0.77712100  |
| C | 1.84745300  | -1.47034500 | 1.30602900  |
| C | 3.46207600  | -0.07326700 | 0.18081000  |
| C | 2.72294600  | -2.55235900 | 1.21741200  |
| H | 0.88321800  | -1.59975100 | 1.78987600  |
| C | 4.33436400  | -1.15671300 | 0.10636000  |

|    |             |             |             |
|----|-------------|-------------|-------------|
| H  | 3.76941200  | 0.88929300  | -0.21191100 |
| C  | 3.98062500  | -2.41607400 | 0.61530100  |
| H  | 2.42628300  | -3.51278300 | 1.62994800  |
| H  | 5.30907400  | -1.02269700 | -0.35587300 |
| C  | 4.94018800  | -3.57748900 | 0.54370600  |
| H  | 5.69245100  | -3.51728300 | 1.34040800  |
| H  | 4.41937000  | -4.53248300 | 0.65641700  |
| H  | 5.48160600  | -3.59052400 | -0.40761600 |
| Al | -2.68624400 | -0.96006900 | 0.04189400  |
| Cl | -1.91121700 | -2.72232500 | 1.08642800  |
| Cl | -3.66574300 | -1.17402000 | -1.89930700 |
| Cl | -4.45172600 | -0.55990000 | 1.34594400  |

## 6. Compound Data of Products

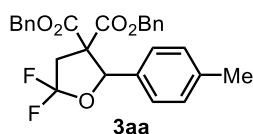

**dibenzyl 5,5-difluoro-2-(p-tolyl)dihydrofuran-3,3(2H)-dicarboxylate (3aa):** Follow the general procedure (*GPI*), **3aa** was obtained as a colorless oil (85.7 mg, 0.18 mmol, yield: 92%) after flash chromatography (Petroleum ether/EtOAc = 50:1, CAM solution, UV): TLC R<sub>f</sub> = 0.19;

**<sup>1</sup>H NMR (400 MHz, CDCl<sub>3</sub>)** δ 7.32 – 7.18 (m, 10H), 7.05 (d, *J* = 8.0 Hz, 2H), 6.91 (d, *J* = 6.9 Hz, 2H), 6.11 (d, *J* = 3.6 Hz, 1H), 5.18 (s, 2H), 4.71 (d, *J* = 12.1 Hz, 1H), 4.44 (d, *J* = 12.1 Hz, 1H), 3.44 (ddd, *J* = 16.8, 14.9, 7.6 Hz, 1H), 2.92 (ddd, *J* = 14.9, 8.5, 3.0 Hz, 1H), 2.30 (s, 3H) ppm;

**<sup>13</sup>C NMR (101 MHz, CDCl<sub>3</sub>)** δ 168.2, 166.1, 138.8, 134.5, 134.1, 131.8 (d, *J* = 1.5 Hz), 130.2 (dd, *J* = 256.7, 254.0 Hz), 128.9, 128.6, 128.6, 128.4, 128.2, 126.4, 84.4, 68.3, 68.0, 63.6 (d, *J* = 3.0 Hz), 40.3 (dd, *J* = 34.2, 30.4 Hz), 21.2 ppm;

**<sup>19</sup>F NMR (376 MHz, CDCl<sub>3</sub>)** δ -58.77 – -59.24 (m, 1F), -71.73 – -72.21 (m, 1F) ppm.

**HRMS (ESI, m/z):** calculated for C<sub>27</sub>H<sub>24</sub>F<sub>2</sub>NaO<sub>5</sub><sup>+</sup> [M+Na]<sup>+</sup>: 489.1489, found: 489.1495.

**IR (film)** ν<sub>max</sub> 1741, 1500, 1436, 1379, 1263, 1090, 971, 747, 697 cm<sup>-1</sup>.

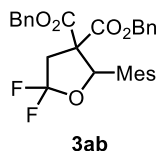

**dibenzyl 5,5-difluoro-2-mesityldihydrofuran-3,3(2H)-dicarboxylate (3ab):** Follow the general procedure (*GPI*), **3ab** was obtained as a colorless oil (74.1 mg, 0.15 mmol, yield: 75%) after flash chromatography (Petroleum ether/EtOAc = 20:1, CAM solution, UV): TLC R<sub>f</sub> = 0.25;

**<sup>1</sup>H NMR (400 MHz, CDCl<sub>3</sub>)** δ 7.35 – 7.27 (m, 4H), 7.26 – 7.21 (m, 4H), 6.87 – 6.82 (m, 2H), 6.63 (s, 1H), 5.21 (s, 2H), 4.64 (d, *J* = 11.9 Hz, 1H), 4.19 (d, *J* = 12.0 Hz, 1H), 3.65 (ddd, *J* = 24.5, 14.9, 6.1 Hz, 1H), 2.94 (ddd, *J* = 14.8, 6.9, 1.0 Hz, 1H), 2.34 (s, 3H), 2.22 (s, 6H) ppm;

**<sup>13</sup>C NMR (101 MHz, CDCl<sub>3</sub>)** δ 169.0, 166.5, 138.1, 134.6, 133.9, 131.4, 129.5 (dd, *J* = 259.8, 251.0 Hz), 129.4, 128.7, 128.6, 128.4, 128.4, 128.4, 128.3, 128.0, 81.7, 68.4, 68.1, 62.6 (d, *J* = 4.1 Hz), 41.5 (dd, *J* = 35.1, 29.6 Hz), 20.8 ppm;

**<sup>19</sup>F NMR (376 MHz, CDCl<sub>3</sub>)** δ -56.08 – -56.59 (m, 1F), -80.28 (dd, *J* = 145.5, 5.1 Hz, 1F) ppm;

**HRMS (ESI, m/z):** calculated for C<sub>29</sub>H<sub>28</sub>F<sub>2</sub>NaO<sub>5</sub><sup>+</sup> [M+Na]<sup>+</sup>: 517.1803, found: 517.1799.

**IR (film)** ν<sub>max</sub> 2979, 1749, 1725, 1457, 1378, 1324, 1276, 1220, 1195, 1116, 1049, 987, 910, 862, 753, 699 cm<sup>-1</sup>.

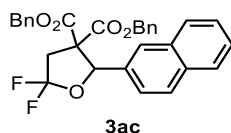

**dibenzyl 5,5-difluoro-2-(naphthalen-2-yl)dihydrofuran-3,3(2H)-dicarboxylate (3ac):** Follow the general procedure (*GPI*), **3ac** was obtained as a colorless oil (85.3 mg, 0.17 mmol, yield: 85%) after flash chromatography (Petroleum ether/EtOAc = 20:1, CAM solution, UV): TLC Rf = 0.25;

**<sup>1</sup>H NMR (400 MHz, CDCl<sub>3</sub>)** δ 7.83 – 7.78 (m, 2H), 7.73 (t, *J* = 8.0 Hz, 2H), 7.53 – 7.46 (m, 2H), 7.42 (dd, *J* = 8.6, 1.7 Hz, 1H), 7.36 – 7.27 (m, 3H), 7.22 (dd, *J* = 7.7, 1.7 Hz, 2H), 7.23 – 7.12 (m, 1H), 7.05 (t, *J* = 7.6 Hz, 2H), 6.63 (d, *J* = 7.2 Hz, 2H), 6.30 (d, *J* = 3.4 Hz, 1H), 5.21 (s, 2H), 4.57 (d, *J* = 12.0 Hz, 1H), 4.25 (d, *J* = 12.1 Hz, 1H), 3.53 (ddd, *J* = 16.4, 15.1, 7.7 Hz, 1H), 2.98 (ddd, *J* = 15.0, 8.7, 3.6 Hz, 1H) ppm;

**<sup>13</sup>C NMR (101 MHz, CDCl<sub>3</sub>)** δ 168.2, 166.2, 134.4, 133.7, 133.4, 132.7, 132.1, 130.4 (dd, *J* = 258.6, 255.5 Hz), 128.7, 128.7, 128.4, 128.3, 128.3, 128.2, 128.1, 127.7, 126.6, 126.4, 126.2, 123.7, 84.5, 68.4, 68.1, 63.7 (d, *J* = 3.0 Hz), 40.51 (dd, *J* = 34.2, 30.4 Hz) ppm;

**<sup>19</sup>F NMR (376 MHz, CDCl<sub>3</sub>)** δ -59.19 (ddd, *J* = 143.8, 16.3, 8.8 Hz, 1F), -71.58 – -72.08 (m, 1F) ppm.

**HRMS (ESI, m/z):** calculated for C<sub>30</sub>H<sub>24</sub>F<sub>2</sub>NaO<sub>5</sub><sup>+</sup> [M+Na]<sup>+</sup>: 525.1489, found: 525.1498.

**IR (film)** ν<sub>max</sub> 3036, 1735, 1456, 1337, 1271, 1249, 1199, 1156, 1114, 1055, 912, 743, 700 cm<sup>-1</sup>.

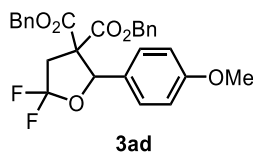

**dibenzyl 5,5-difluoro-2-(4-methoxyphenyl)dihydrofuran-3,3(2H)-dicarboxylate (3ad):** Follow the general procedure (*GPI*), **3ad** was obtained as a colorless oil (38.6 mg, 0.08 mmol, yield: 40%) after flash chromatography (Petroleum ether/EtOAc = 20:1, CAM solution, UV): TLC Rf = 0.25;

**<sup>1</sup>H NMR (400 MHz, CDCl<sub>3</sub>)** δ 7.32 – 7.19 (m, 10H), 6.95 – 6.90 (m, 2H), 6.79 – 6.73 (m, 2H), 6.09 (d, *J* = 3.5 Hz, 1H), 5.18 (d, *J* = 1.0 Hz, 2H), 4.72 (d, *J* = 12.2 Hz, 1H), 4.46 (d, *J* = 12.1 Hz, 1H), 3.76 (s, 3H), 3.43 (ddd, *J* = 16.8, 15.0, 7.6 Hz, 1H), 2.91 (ddd, *J* = 14.8, 8.6, 3.2 Hz, 1H) ppm;

**<sup>13</sup>C NMR (101 MHz, CDCl<sub>3</sub>)** δ 168.2, 166.2, 160.0, 134.5, 134.1, 130.1 (dd, *J* = 256.8, 253.9 Hz), 128.7, 128.6, 128.4, 128.2, 127.9, 126.8, 126.8, 113.6, 84.3, 68.3, 68.0, 63.6 (d, *J* = 2.8 Hz), 55.2, 40.3 (dd, *J* = 34.3, 30.4 Hz) ppm;

**<sup>19</sup>F NMR (376 MHz, CDCl<sub>3</sub>)** δ -59.19 (ddd, *J* = 144.4, 17.0, 8.5 Hz, 1F), -71.67 – -72.12 (m, 1F) ppm.

**HRMS (ESI, m/z):** calculated for C<sub>27</sub>H<sub>24</sub>F<sub>2</sub>NaO<sub>6</sub><sup>+</sup> [M+Na]<sup>+</sup>: 505.1439, found: 505.1434.

**IR (film)** ν<sub>max</sub> 1739, 1615, 1516, 1456, 1337, 1255, 1159, 1109, 1052, 1030, 944, 910, 748, 697 cm<sup>-1</sup>.

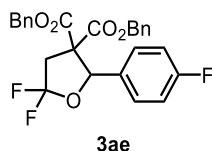

**dibenzyl 5,5-difluoro-2-(4-fluorophenyl)dihydrofuran-3,3(2H)-dicarboxylate (3ae):** Follow the general procedure (*GPI*), **3ae** was obtained as a white solid (57.3 mg, 0.12 mmol, yield: 61%) after flash chromatography (Petroleum ether/EtOAc = 50:1, CAM solution, UV): TLC Rf = 0.20;

**<sup>1</sup>H NMR (400 MHz, CDCl<sub>3</sub>)** δ 7.36 – 7.21 (m, 10H), 6.95 – 6.85 (m, 4H), 6.09 (d, *J* = 3.4 Hz, 1H), 5.19 (s, 2H), 4.70 (d, *J* = 12.1 Hz, 1H), 4.49 (d, *J* = 12.1 Hz, 1H), 3.48 – 3.37 (m, 1H), 2.93 (ddd, *J* = 14.9, 8.8, 3.8 Hz, 1H) ppm;

**<sup>13</sup>C NMR (101 MHz, CDCl<sub>3</sub>)** δ 168.1, 166.1, 162.9 (d, *J* = 248.0 Hz), 134.4, 133.9, 130.5, 130.0 (dd, *J* = 257.3, 254.4 Hz), 128.8, 128.7, 128.6, 128.5, 128.4, 128.3, 115.3, 83.7, 68.4, 68.1, 63.5, 40.4 (dd, *J* = 34.3, 30.3 Hz) ppm;

**<sup>19</sup>F NMR (376 MHz, CDCl<sub>3</sub>)** δ -59.51 (ddd, *J* = 143.2, 16.2, 8.9 Hz, 1F), -71.73 (ddt, *J* = 143.2, 7.1, 3.6 Hz, 1F), -112.09 (ddd, *J* = 13.5, 8.8, 5.6 Hz, 1F) ppm.

**HRMS (ESI, m/z):** calculated for C<sub>26</sub>H<sub>21</sub>F<sub>3</sub>NaO<sub>5</sub><sup>+</sup> [M+Na]<sup>+</sup>: 493.1239, found: 493.1237.

**IR (film)** ν<sub>max</sub> 1737, 1609, 1513, 1456, 1384, 1337, 1272, 1158, 1115, 1055, 948, 913, 851, 747, 700 cm<sup>-1</sup>.

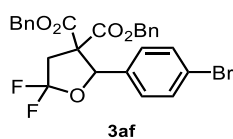

**dibenzyl 2-(4-bromophenyl)-5,5-difluorodihydrofuran-3,3(2H)-dicarboxylate (3af):** Follow the general procedure (*GPI*), **3af** was obtained as a white solid (71.0 mg, 0.13 mmol, yield: 67%) after flash chromatography (Petroleum ether/EtOAc = 50:1, CAM solution, UV): TLC Rf = 0.20;

**<sup>1</sup>H NMR (400 MHz, CDCl<sub>3</sub>)** δ 7.35 – 7.21 (m, 10H), 7.17 (d, *J* = 8.5 Hz, 2H), 6.91 (d, *J* = 6.8 Hz, 2H), 6.05 (d, *J* = 3.4 Hz, 1H), 5.19 (s, 2H), 4.69 (d, *J* = 12.0 Hz, 1H), 4.52 (d, *J* = 12.0 Hz, 1H), 3.42 (td, *J* = 15.4, 7.7 Hz, 1H), 2.92 (ddd, *J* = 15.0, 8.9, 4.0 Hz, 1H) ppm;

**<sup>13</sup>C NMR (101 MHz, CDCl<sub>3</sub>)** δ 168.0, 166.0, 134.4, 133.8, 133.7, 131.4, 130.0 (dd, *J* = 257.4, 255.0 Hz), 128.8, 128.7, 128.5, 128.5, 128.2, 123.2, 83.6, 68.4, 68.2, 63.4 (d, *J* = 2.7 Hz), 40.5 (dd, *J* = 34.4, 30.3 Hz) ppm;

**<sup>19</sup>F NMR (376 MHz, CDCl<sub>3</sub>)** δ -59.61 (ddd, *J* = 143.0, 14.9, 8.7 Hz), -71.66 (dd, *J* = 142.0, 9.6 Hz) ppm.

**HRMS (ESI, m/z):** calculated for C<sub>26</sub>H<sub>21</sub>BrF<sub>2</sub>NaO<sub>5</sub><sup>+</sup> [M+Na]<sup>+</sup>: 553.0438, found: 553.0443.

**IR (film)** ν<sub>max</sub> 3028, 1738, 1491, 1456, 1384, 1328, 1269, 1214, 1165, 1117, 1056, 1029, 980, 944, 912, 749, 701 cm<sup>-1</sup>.

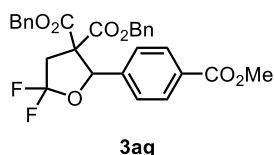

**dibenzyl 5,5-difluoro-2-(4-(methoxycarbonyl)phenyl)dihydrofuran-3,3(2H)-dicarboxylate (3ag):** Follow the general procedure (*GPI*), **3ag** was obtained as a colorless oil (79.5 mg, 0.16 mmol, yield: 78%) after flash chromatography (Petroleum ether/EtOAc = 20:1, CAM solution, UV): TLC Rf = 0.25;

**<sup>1</sup>H NMR (400 MHz, CDCl<sub>3</sub>)** δ 7.88 (d, *J* = 8.5 Hz, 2H), 7.39 (d, *J* = 8.3 Hz, 2H), 7.35 – 7.29 (m, 3H), 7.27 – 7.20 (m, 5H), 6.88 (d, *J* = 6.9 Hz, 2H), 6.15 (d, *J* = 3.4 Hz, 1H), 5.20 (s, 2H), 4.66 (d, *J* = 12.1 Hz, 1H), 4.46 (d, *J* = 12.1 Hz, 1H), 3.92 (s, 3H), 3.44 (td, *J* = 15.4, 7.6 Hz, 1H), 2.95 (ddd, *J* = 14.9, 8.8, 3.9 Hz, 1H) ppm;

**<sup>13</sup>C NMR (101 MHz, CDCl<sub>3</sub>)** δ 168.1, 166.6, 166.0, 139.7, 134.5, 133.9, 130.8, 130.2 (dd, *J* = 257.5, 254.9 Hz), 129.6, 128.9, 128.8, 128.7, 128.6, 128.6, 128.5, 126.6, 83.8, 68.6, 68.2, 63.7 (d, *J* = 2.7 Hz), 52.3, 40.6 (dd, *J* = 34.2, 30.3 Hz) ppm;

**<sup>19</sup>F NMR (376 MHz, CDCl<sub>3</sub>)** δ -59.34 – -59.86 (m, 1F), -71.55 – -72.01 (m, 1F) ppm.

**HRMS (ESI, m/z):** calculated for C<sub>28</sub>H<sub>24</sub>F<sub>2</sub>NaO<sub>7</sub><sup>+</sup> [M+Na]<sup>+</sup>: 533.1388, found: 533.1390.

**IR (film)** ν<sub>max</sub> 2953, 1739, 1723, 1457, 1438, 1383, 1326, 1271, 1216, 1199, 1113, 1054, 982, 947, 913, 750, 701 cm<sup>-1</sup>.

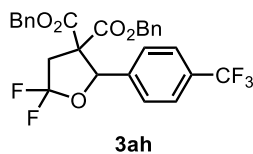

**dibenzyl 5,5-difluoro-2-(4-(trifluoromethyl)phenyl)dihydrofuran-3,3(2H)-dicarboxylate (3ah):** Follow the general procedure (*GPI*), **3ah** was obtained as a colorless oil (72.8 mg, 0.14 mmol, yield: 70%) after flash chromatography (Petroleum ether/EtOAc = 50:1, CAM solution, UV): TLC Rf = 0.25;

**<sup>1</sup>H NMR (400 MHz, CDCl<sub>3</sub>)** δ 7.47 – 7.41 (m, 4H), 7.35 – 7.28 (m, 4H), 7.26 – 7.21 (m, 4H), 6.86 (d, *J* = 7.2 Hz, 2H), 6.12 (d, *J* = 3.3 Hz, 1H), 5.20 (s, 2H), 4.66 (d, *J* = 12.0 Hz, 1H), 4.45 (d, *J* = 12.0 Hz, 1H), 3.43 (td, *J* = 15.2, 7.7 Hz, 1H), 2.94 (ddd, *J* = 15.0, 9.0, 4.3 Hz, 1H) ppm;

**<sup>13</sup>C NMR (101 MHz, CDCl<sub>3</sub>)** δ 167.9, 166.0, 138.6, 134.3, 133.6, 131.0 (q, *J* = 32.7 Hz), 130.2 (dd, *J* = 258.6, 255.5 Hz), 128.8, 128.7, 128.7, 128.5, 128.4, 127.0, 125.2, 125.1, 123.7 (q, *J* = 273.7 Hz), 83.4, 68.5, 68.3, 63.4 (d, *J* = 2.4 Hz), 40.6 (dd, *J* = 34.2, 30.3 Hz) ppm;

**<sup>19</sup>F NMR (376 MHz, CDCl<sub>3</sub>)** δ -59.71 (ddd, *J* = 143.2, 15.6, 8.7 Hz, 1F), -62.52 (s, 3F), -71.54 (ddt, *J* = 144.2, 8.1, 3.8 Hz, 1F) ppm.

**HRMS (ESI, m/z):** calculated for C<sub>27</sub>H<sub>21</sub>F<sub>5</sub>NaO<sub>5</sub><sup>+</sup> [M+Na]<sup>+</sup>: 543.1207, found: 543.1210.

**IR (film)** ν<sub>max</sub> 1739, 1457, 1383, 1333, 1270, 1217, 1162, 1130, 1071, 982, 944, 913, 856, 750, 701 cm<sup>-1</sup>.



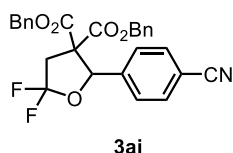

**dibenzyl 2-(4-cyanophenyl)-5,5-difluorodihydrofuran-3,3(2H)-dicarboxylate (3ai):** Follow the general procedure (*GPI*), **3ai** was obtained as a colorless oil (33.5 mg, 0.07 mmol, yield: 35%) after flash chromatography (Petroleum ether/EtOAc = 50:1, CAM solution, UV): TLC Rf = 0.25;

**<sup>1</sup>H NMR (400 MHz, CDCl<sub>3</sub>)** δ 7.41 – 7.32 (m, 8H), 7.31 – 7.25 (m, 4H), 6.88 (d, *J* = 7.3 Hz, 2H), 6.07 (d, *J* = 3.3 Hz, 1H), 5.22 (d, *J* = 5.2 Hz, 2H), 4.59 (s, 2H), 3.42 (td, *J* = 15.0, 7.8 Hz, 1H), 2.94 (ddd, *J* = 15.0, 9.1, 4.9 Hz, 1H) ppm;

**<sup>13</sup>C NMR (101 MHz, CDCl<sub>3</sub>)** δ 167.8, 165.9, 139.6 (d, *J* = 1.2 Hz), 134.3, 133.5, 131.8, 129.9 (dd, *J* = 258.4, 255.9 Hz), 128.9, 128.7, 128.6, 127.2, 118.3, 112.8, 83.1, 68.6, 68.2, 63.4 (d, *J* = 2.5 Hz), 40.7 (dd, *J* = 34.4, 30.0 Hz) ppm;

**<sup>19</sup>F NMR (376 MHz, CDCl<sub>3</sub>)** δ -60.10 (ddd, *J* = 143.1, 14.6, 8.9 Hz, 1F), -71.32 (ddt, *J* = 143.4, 8.4, 4.5 Hz, 1F).

**HRMS (ESI, m/z):** calculated for C<sub>27</sub>H<sub>21</sub>F<sub>2</sub>NO<sub>5</sub><sup>+</sup> [M+H]<sup>+</sup>: 478.1466, found: 478.1469.

**IR (film)** ν<sub>max</sub> 2230, 1738, 1498, 1456, 1378, 1275, 1197, 1158, 1113, 1052, 946, 910, 751, 698 cm<sup>-1</sup>.

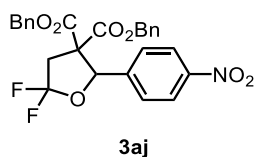

**dibenzyl 5,5-difluoro-2-(4-nitrophenyl)dihydrofuran-3,3(2H)-dicarboxylate (3aj):** Follow the general procedure (*GPI*), **3aj** was obtained as a colorless oil (52.7 mg, 0.11 mmol, yield: 53%) after flash chromatography (Petroleum ether/EtOAc = 50:1, CAM solution, UV): TLC Rf = 0.25;

**<sup>1</sup>H NMR (400 MHz, CDCl<sub>3</sub>)** δ 7.90 (d, *J* = 8.7 Hz, 1H), 7.43 (d, *J* = 8.8 Hz, 2H), 7.37 – 7.34 (m, 2H), 7.30 – 7.26 (m, 2H), 7.19 (t, *J* = 7.5 Hz, 1H), 6.85 (d, *J* = 7.4 Hz, 1H), 6.11 (d, *J* = 3.3 Hz, 1H), 5.28 (d, *J* = 12.0 Hz, 1H), 5.21 (d, *J* = 12.0 Hz, 1H), 4.66 (d, *J* = 11.9 Hz, 1H), 4.55 (d, *J* = 11.9 Hz, 1H), 3.45 (td, *J* = 14.8, 7.8 Hz, 1H), 2.96 (ddd, *J* = 14.7, 9.2, 5.1 Hz, 1H) ppm;

**<sup>13</sup>C NMR (101 MHz, CDCl<sub>3</sub>)** δ 167.7, 165.9, 147.9, 141.4, 134.3, 133.4, 129.9 (dd, *J* = 258.6, 256.5 Hz), 128.9, 128.9, 128.7, 128.7, 128.6, 128.4, 127.3, 123.2, 82.9, 68.6, 68.2, 63.4 (d, *J* = 2.0 Hz), 40.8 (dd, *J* = 34.4, 30.1 Hz) ppm;

**<sup>19</sup>F NMR (376 MHz, CDCl<sub>3</sub>)** δ -60.18 (ddd, *J* = 143.1, 14.7, 9.1 Hz, 1F), -71.09 (ddt, *J* = 143.2, 8.3, 4.1 Hz, 1F) ppm;

**HRMS (ESI, m/z):** calculated for C<sub>26</sub>H<sub>21</sub>F<sub>2</sub>NNaO<sub>7</sub><sup>+</sup> [M+Na]<sup>+</sup>: 520.1184, found: 520.1193.

**IR (film)** ν<sub>max</sub> 1749, 1729, 1608, 1514, 1456, 1432, 1351, 1269, 1150, 1129, 1100, 1039, 1006, 911, 758, 702 cm<sup>-1</sup>.

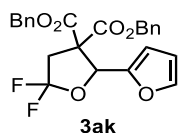

**dibenzyl 5,5-difluoro-2-(furan-2-yl)dihydrofuran-3,3(2H)-dicarboxylate (3ak):** Follow the general procedure (*GPI*), **3ak** was obtained as a colorless oil (62.8 mg, 0.14 mmol, yield: 71%) after flash chromatography (Petroleum ether/EtOAc = 50:1, CAM solution, UV): TLC Rf = 0.25;

**<sup>1</sup>H NMR (400 MHz, CDCl<sub>3</sub>)** δ 7.35 – 7.24 (m, 7H), 7.26 – 7.17 (m, 3H), 7.05 – 6.95 (m, 3H), 6.19 (d, *J* = 3.5 Hz, 1H), 5.19 (d, *J* = 1.4 Hz, 2H), 4.81 (d, *J* = 12.2 Hz, 1H), 4.56 (d, *J* = 12.2 Hz, 1H), 3.48 – 3.36 (m, 1H), 2.93 (ddd, *J* = 15.0, 8.8, 3.3 Hz, 1H) ppm;

**<sup>13</sup>C NMR (101 MHz, CDCl<sub>3</sub>)** δ 168.0, 166.0, 135.9 (d, *J* = 1.7 Hz), 134.4, 134.1, 130.1 (dd, *J* = 256.9, 254.6 Hz), 128.7, 128.6, 128.5, 128.4, 128.3, 126.2, 125.8, 123.7, 81.3, 68.4, 68.1, 63.3 (d, *J* = 2.7 Hz), 40.2 (dd, *J* = 33.8, 30.7 Hz) ppm;

**<sup>19</sup>F NMR (376 MHz, CDCl<sub>3</sub>)** δ -59.17 (ddd, *J* = 144.3, 16.0, 8.7 Hz, 1F), -70.58 (ddt, *J* = 144.2, 7.7, 3.4 Hz, 1F) ppm.

**HRMS (ESI, m/z):** calculated for C<sub>24</sub>H<sub>20</sub>F<sub>2</sub>NaO<sub>6</sub><sup>+</sup> [M+Na]<sup>+</sup>: 443.1306, found: 443.1308.

**IR (film)** ν<sub>max</sub> 3108, 2968, 1758, 1735, 1457, 1338, 1274, 1195, 1160, 1112, 1056, 1033, 938, 898, 795, 752, 697 cm<sup>-1</sup>.

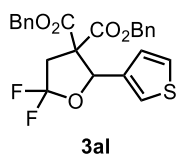

**dibenzyl 5,5-difluoro-2-(thiophen-3-yl)dihydrofuran-3,3(2H)-dicarboxylate (3al):** Follow the general procedure (*GPI*), **3al** was obtained as a colorless oil (49.4 mg, 0.11 mmol, yield: 54%) after flash chromatography (Petroleum ether/EtOAc = 50:1, CAM solution, UV): TLC Rf = 0.25;

**<sup>1</sup>H NMR (400 MHz, CDCl<sub>3</sub>)** δ 7.33 – 7.23 (m, 7H), 7.07 (dd, *J* = 7.7, 17 Hz, 3H), 6.33 (d, *J* = 3.2 Hz, 1H), 6.24 (dd, *J* = 3.3, 1.8 Hz, 1H), 6.12 (d, *J* = 3.8 Hz, 1H), 5.25 – 5.16 (m, 2H), 4.83 (q, *J* = 12.0 Hz, 2H), 3.56 (ddd, *J* = 18.9, 14.8, 7.6 Hz, 1H), 3.00 (dd, *J* = 14.9, 7.8 Hz, 1H) ppm;

**<sup>13</sup>C NMR (101 MHz, CDCl<sub>3</sub>)** δ 167.5, 165.0, 147.9 (d, *J* = 3.2 Hz), 143.7, 134.5, 134.2, 128.7, 128.6, 128.6, 128.5, 128.4, 128.4, 110.8, 110.4, 78.2, 68.6, 68.2, 62.6 (d, *J* = 2.9 Hz), 39.7 (t, *J* = 31.6 Hz) ppm;

**<sup>19</sup>F NMR (376 MHz, CDCl<sub>3</sub>)** δ -58.45 (ddd, *J* = 143.0, 18.0, 7.4 Hz, 1F), -70.30 (dd, *J* = 142.6, 10.4 Hz, 1F) ppm.

**HRMS (ESI, m/z):** calculated for C<sub>24</sub>H<sub>20</sub>F<sub>2</sub>NaO<sub>5</sub>S<sup>+</sup> [M+Na]<sup>+</sup>: 481.0897, found: 481.0892.

**IR (film)** ν<sub>max</sub> 1743, 1500, 1456, 1376, 1334, 1273, 1197, 1153, 1114, 1059, 1014, 937, 748, 698 cm<sup>-1</sup>.

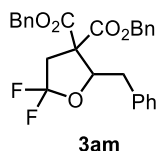

**dibenzyl 2-benzyl-5,5-difluorodihydrofuran-3,3(2H)-dicarboxylate (3am):** Follow the general procedure (*GPI*), **3am** was obtained as a colorless oil (49.4 mg, 0.11 mmol, yield: 53%) after flash chromatography (Petroleum ether/EtOAc = 50:1, CAM solution, UV): TLC R<sub>f</sub> = 0.22;

<sup>1</sup>H NMR (400 MHz, CDCl<sub>3</sub>) δ 7.36 – 7.31 (m, 6H), 7.30 – 7.22 (m, 7H), 7.12 (d, *J* = 6.7 Hz, 2H), 5.18 – 5.06 (m, 5H), 3.39 – 3.23 (m, 1H), 2.95 – 2.81 (m, 2H), 2.70 (dd, *J* = 14.2, 10.3 Hz, 1H) ppm;

<sup>13</sup>C NMR (101 MHz, CDCl<sub>3</sub>) δ 167.8, 166.6, 136.4, 134.5, 134.3, 130.0 (t, *J* = 130.5 Hz), 129.2, 128.8, 128.7, 128.7, 128.5, 128.4, 128.4, 126.9, 84.1, 68.3, 68.2, 61.3 (d, *J* = 1.8 Hz), 40.8 (dd, *J* = 34.2, 31.5 Hz), 37.3 ppm;

<sup>19</sup>F NMR (376 MHz, CDCl<sub>3</sub>) δ -59.72 (ddd, *J* = 144.3, 13.2, 9.5 Hz, 1F), -66.89 (ddt, *J* = 144.4, 8.8, 4.9 Hz, 1F) ppm;

**HRMS (ESI, m/z):** calculated for C<sub>27</sub>H<sub>24</sub>F<sub>2</sub>NaO<sub>5</sub><sup>+</sup> [M+Na]<sup>+</sup>: 489.1489, found: 489.1492.

**IR (film)** ν<sub>max</sub> 3034, 1739, 1498, 1456, 1377, 1334, 1270, 1198, 1169, 1114, 1074, 748, 698 cm<sup>-1</sup>.

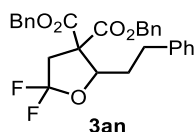

**dibenzyl 5,5-difluoro-2-phenethyldihydrofuran-3,3(2H)-dicarboxylate (3an):** Follow the general procedure (*GPI*), **3an** was obtained as a colorless oil (62.4 mg, 0.13 mmol, yield: 65%) after flash chromatography (Petroleum ether/EtOAc = 50:1, CAM solution, UV): TLC R<sub>f</sub> = 0.25;

<sup>1</sup>H NMR (400 MHz, CDCl<sub>3</sub>) δ 7.35 – 7.17 (m, 13H), 7.04 (d, *J* = 7.0 Hz, 2H), 5.19 – 5.09 (m, 3H), 5.02 (d, *J* = 12.0 Hz, 1H), 4.87 (dt, *J* = 10.1, 3.7 Hz, 1H), 3.26 (td, *J* = 14.4, 13.9, 8.2 Hz, 1H), 2.84 (dddd, *J* = 19.4, 14.4, 9.4, 5.4 Hz, 2H), 2.61 (ddd, *J* = 13.9, 9.3, 7.6 Hz, 1H), 1.81 – 1.64 (m, 2H) ppm;

<sup>13</sup>C NMR (101 MHz, CDCl<sub>3</sub>) δ 167.9, 166.6, 140.4, 134.6, 134.3, 130.0 (t, *J* = 255.4 Hz), 128.8, 128.6, 128.4, 128.3, 126.1, 82.7, 68.1, 61.4 (d, *J* = 2.2 Hz), 40.8 (dd, *J* = 33.9, 31.8 Hz), 32.8, 32.0 ppm;

<sup>19</sup>F NMR (376 MHz, CDCl<sub>3</sub>) δ -59.31 – -59.82 (m, 1F), -67.16 (dd, *J* = 149.0, 7.8 Hz, 1F) ppm.

**HRMS (ESI, m/z):** calculated for C<sub>28</sub>H<sub>26</sub>F<sub>2</sub>O<sub>5</sub><sup>+</sup> [M+Na]<sup>+</sup>: 503.1646, found: 503.1649.

**IR (film)** ν<sub>max</sub> 2960, 2926, 2855, 1742, 1502, 1456, 1263, 1171, 1113, 1031, 995, 909, 803, 751, 698 cm<sup>-1</sup>.

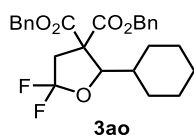

**dibenzyl 2-cyclohexyl-5,5-difluorodihydrofuran-3,3(2H)-dicarboxylate (3ao):** Follow the general procedure, **3ao** was obtained as a colorless oil (53.1 mg, 0.12 mmol, yield: 58%) after flash chromatography (Petroleum ether/EtOAc = 50:1, CAM solution, UV): TLC Rf = 0.25;

**<sup>1</sup>H NMR (400 MHz, CDCl<sub>3</sub>)** δ 7.36 – 7.31 (m, 6H), 7.29 – 7.23 (m, 4H), 5.19 (d, *J* = 12.0 Hz, 1H), 5.15 (s, 2H), 5.05 (d, *J* = 11.9 Hz, 1H), 4.73 (dd, *J* = 6.1, 3.8 Hz, 1H), 3.24 (td, *J* = 14.5, 7.8 Hz, 1H), 2.80 (ddd, *J* = 14.6, 9.2, 5.0 Hz, 1H), 1.72 – 1.50 (m, 5H), 1.42 (m, 1H), 1.12 – 0.99 (m, 3H), 0.98 – 0.84 (m, 2H) ppm;

**<sup>13</sup>C NMR (101 MHz, CDCl<sub>3</sub>)** δ 168.4, 166.9, 134.6, 134.3, 129.8 (t, *J* = 254.5 Hz), 128.89, 128.8, 128.7, 128.6, 128.4, 88.0, 68.1, 68.12, 61.0 (d, *J* = 2.3 Hz), 42.1 (dd, *J* = 34.8, 30.8 Hz), 39.1, 29.9, 27.7, 25.8, 25.6, 25.4 . ppm;

**<sup>19</sup>F NMR (376 MHz, CDCl<sub>3</sub>)** δ -58.95 (ddd, *J* = 144.2, 14.1, 9.1 Hz, 1F), -70.04 (ddt, *J* = 144.2, 8.3, 4.7 Hz, 1F) ppm.

**HRMS (ESI, m/z):** calculated for C<sub>26</sub>H<sub>28</sub>F<sub>2</sub>NaO<sub>5</sub><sup>+</sup> [M+Na]<sup>+</sup>: 481.1803, found: 481.1809.

**IR (film)** ν<sub>max</sub> 2930, 2855, 1739, 1498, 1455, 1335, 1269, 1213, 1113, 1028, 972, 909, 751, 698 cm<sup>-1</sup>.

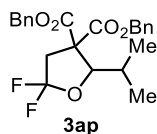

**dibenzyl 5,5-difluoro-2-isopropyldihydrofuran-3,3(2H)-dicarboxylate(3ap):** Follow the general procedure (*GPI*), **3ap** was obtained as a colorless oil (52.7 mg, 0.13 mmol, yield: 64%) after flash chromatography (Petroleum ether/EtOAc = 50:1, CAM solution, UV): TLC Rf = 0.30;

**<sup>1</sup>H NMR (400 MHz, CDCl<sub>3</sub>)** δ 7.36 – 7.30 (m, 6H), 7.26 – 7.21 (m, 4H), 5.14 (t, *J* = 5.6 Hz, 4H), 4.76 (dd, *J* = 6.2, 3.9 Hz, 1H), 3.26 (td, *J* = 14.7, 7.8 Hz, 1H), 2.89 – 2.77 (m, 1H), 1.85 (h, *J* = 6.6 Hz, 1H), 0.90 (d, *J* = 6.6 Hz, 6H) ppm;

**<sup>13</sup>C NMR (101 MHz, CDCl<sub>3</sub>)** δ 168.4, 134.4, 129.8 (t, *J* = 250.3 Hz), 128.6, 128.6, 99.0, 68.0, 67.1, 43.2 (t, *J* = 31.8 Hz), 34.2, 19.2, 17.9 ppm;

**<sup>19</sup>F NMR (376 MHz, CDCl<sub>3</sub>)** δ -59.18 (ddd, *J* = 144.2, 14.5, 9.1 Hz, 1F), -70.08 (ddt, *J* = 144.2, 8.2, 4.3 Hz, 1F).

**HRMS (ESI, m/z):** calculated for C<sub>23</sub>H<sub>24</sub>F<sub>2</sub>NaO<sub>5</sub><sup>+</sup> [M+Na]<sup>+</sup>: 441.1489, found: 441.1495.

**IR (film)** ν<sub>max</sub> 3055, 2969, 1739, 1498, 1456, 1373, 1334, 1269, 1169, 1127, 1087, 1060, 909, 751, 698 cm<sup>-1</sup>.

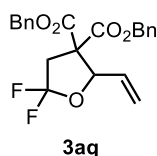

**dibenzyl 5,5-difluoro-2-vinyldihydrofuran-3,3(2H)-dicarboxylate (3aq):** Follow the general procedure (*GPI*), **3aq** was obtained as a colorless oil (61.1 mg, 0.15 mmol, yield: 76%) after flash chromatography (Petroleum ether/EtOAc = 50:1, KMnO<sub>4</sub>, UV): TLC Rf = 0.25;

**<sup>1</sup>H NMR (400 MHz, CDCl<sub>3</sub>)** δ 7.35 – 7.30 (m, 5H), 7.27 – 7.20 (m, 4H), 5.66 (ddd, *J* = 16.9, 10.5, 6.2 Hz, 1H), 5.48 – 5.44 (m, 1zH), 5.40 (dt, *J* = 17.1, 1.3 Hz, 1H), 5.23 – 5.14 (m, 3H), 5.05 (dd, *J* = 21.4, 12.0 Hz, 2H), 3.24 (ddd, *J* = 16.3, 15.0, 7.8 Hz, 1H), 2.89 (ddd, *J* = 14.9, 8.4, 3.2 Hz, 1H) ppm;

**<sup>13</sup>C NMR (101 MHz, CDCl<sub>3</sub>)** δ 167.7, 165.9, 134.5, 134.3, 130.7 (d, *J* = 2.1 Hz), 130.2 (t, *J* = 255.6 Hz), 128.70, 128.67, 128.62, 128.58, 128.54, 128.35, 120.1, 83.3, 68.3, 68.2, 62.3 (d, *J* = 2.7 Hz), 39.8 (t, *J* = 32.1 Hz) ppm;

**<sup>19</sup>F NMR (376 MHz, CDCl<sub>3</sub>)** δ -59.00 (ddd, *J* = 144.4, 16.4, 8.4 Hz, 1F), -68.83 (ddt, *J* = 144.5, 7.3, 3.3 Hz, 1F) ppm.

**HRMS (ESI, m/z):** calculated for C<sub>22</sub>H<sub>20</sub>F<sub>2</sub>NaO<sub>5</sub><sup>+</sup> [M+Na]<sup>+</sup>: 425.1176, found: 425.1174.

**IR (film)** ν<sub>max</sub> 1741, 1499, 1456, 1377, 1334, 1271, 1199, 1166, 1105, 1058, 948, 910, 750, 697 cm<sup>-1</sup>.

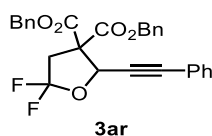

**dibenzyl 5,5-difluoro-2-(phenylethynyl)dihydrofuran-3,3(2H)-dicarboxylate (3ar):** Follow the general procedure (*GPI*), **3ar** was obtained as a white solid (85.7 mg, 0.18 mmol, yield: 90%) after flash chromatography (Petroleum ether/EtOAc = 20:1, KMnO<sub>4</sub>, UV): TLC R<sub>f</sub> = 0.25;

**<sup>1</sup>H NMR (400 MHz, CDCl<sub>3</sub>)** δ 7.38 – 7.17 (m, 15H), 5.97 (d, *J* = 3.6 Hz, 1H), 5.22 (q, *J* = 12.1 Hz, 2H), 5.12 (s, 2H), 3.47 (ddd, *J* = 17.8, 14.9, 8.1 Hz, 1H), 3.03 (ddd, *J* = 14.8, 8.1, 1.5 Hz, 1H) ppm;

**<sup>13</sup>C NMR (101 MHz, CDCl<sub>3</sub>)** δ 166.9, 165.0, 134.4, 134.3, 131.9, 130.6 (dd, *J* = 259.1, 255.4 Hz), 129.3, 128.7, 128.6, 128.5, 128.4, 128.3, 128.2, 120.9, 89.7, 81.3 (d, *J* = 4.0 Hz), 73.4, 68.6, 68.4, 63.9 (d, *J* = 2.4 Hz), 39.5 (t, *J* = 31.7 Hz) ppm;

**<sup>19</sup>F NMR (376 MHz, CDCl<sub>3</sub>)** δ -59.12 (ddd, *J* = 143.1, 17.9, 9.0 Hz, 1F), -66.71 – -67.41 (m, 1F) ppm.

**HRMS (ESI, m/z):** calculated for C<sub>28</sub>H<sub>22</sub>F<sub>2</sub>NaO<sub>5</sub><sup>+</sup> [M+Na]<sup>+</sup>: 499.1333, found: 499.1336.

**IR (film)** ν<sub>max</sub> 3035, 2235, 1745, 1491, 1456, 1332, 1308, 1274, 1195, 1159, 1117, 1057, 757, 696 cm<sup>-1</sup>.

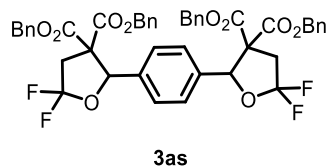

**tetrabenzyl 2,2'-(1,4-phenylene)bis(5,5-difluorodihydrofuran-3,3(2H)-dicarboxylate)(3as):**

Follow the general procedure (*GPI*), **3as** was obtained as a white solid (85.7 mg, 0.18 mmol, yield: 90%) after flash chromatography (Petroleum ether/EtOAc = 20:1, CAM solution, UV): TLC R<sub>f</sub> = 0.25;

**<sup>1</sup>H NMR (400 MHz, CDCl<sub>3</sub>)** δ 7.35 – 7.18 (m, 20H), 6.97 (d, *J* = 7.7 Hz, 2H), 6.92 (d, *J* = 7.7 Hz, 2H), 6.09 (dd, *J* = 6.1, 3.5 Hz, 2H), 5.20 (d, *J* = 8.7 Hz, 4H), 4.70 (dd, *J* = 16.8, 12.1 Hz, 2H), 4.47 (t, *J* = 11.6 Hz, 2H), 3.49 – 3.33 (m, 2H), 2.95 (dd, *J* = 14.8, 8.7 Hz, 2H) ppm;

$^{13}\text{C}$  NMR (101 MHz,  $\text{CDCl}_3$ )  $\delta$  168.3 , 168.2 , 166.1 , 165.8 , 135.9 , 135.7 , 134.6 , 134.5 , 134.1 , 134.0 , 130.4 (dd,  $J = 261.9, 254.8$  Hz), 130.3 (dd,  $J = 261.9, 254.8$  Hz), 126.7 , 126.6 , 84.0 , 84.0 , 68.6 , 68.6 , 68.3 , 68.3 , 63.7 (t,  $J = 3.2$  Hz), 41.0 – 39.8 (m) ppm;

$^{19}\text{F}$  NMR (376 MHz,  $\text{CDCl}_3$ )  $\delta$  -58.53 – -59.88 (m), -71.47 – -72.78 (m) ppm;

HRMS (ESI,  $m/z$ ): calculated for  $\text{C}_{46}\text{H}_{38}\text{F}_4\text{NaO}_{10}^+$   $[\text{M}+\text{Na}]^+$ : 849.2299, found: 849.2302.

IR (film)  $\nu_{\text{max}}$  3035, 1739, 1499, 1456, 1337, 1273, 1198, 1159, 1111, 1053, 700, 697  $\text{cm}^{-1}$ .

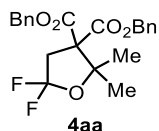

**benzyl 3-((benzylperoxy)-1,2-methyl)-5,5-difluoro-2,2-dimethyltetrahydrofuran-3-carboxylate (4aa):**

Follow the general procedure (*GP1*), **4aa** was obtained as a colorless oil (72.7 mg, 0.18 mmol, yield: 90%) after flash chromatography (Petroleum ether/EtOAc = 50:1, CAM solution, UV): TLC  $R_f$  = 0.30;

$^1\text{H}$  NMR (400 MHz,  $\text{CDCl}_3$ )  $\delta$  7.35 – 7.31 (m, 6H), 7.30 – 7.26 (m, 4H), 5.19 (d,  $J = 12.2$  Hz, 2H), 5.14 (d,  $J = 12.2$  Hz, 2H), 3.11 (t,  $J = 9.1$  Hz, 2H), 1.43 (s, 6H) ppm;

$^{13}\text{C}$  NMR (101 MHz,  $\text{CDCl}_3$ )  $\delta$  167.5 , 134.6 , 129.6 (t,  $J = 253.9$  Hz), 128.6 , 128.4 , 87.8 , 67.9 , 65.3 , 41.5 (t,  $J = 32.8$  Hz), 24.8 ppm;

$^{19}\text{F}$  NMR (376 MHz,  $\text{CDCl}_3$ )  $\delta$  -59.35 (t,  $J = 9.1$  Hz, 2F) ppm.

HRMS (ESI,  $m/z$ ): calculated for  $\text{C}_{22}\text{H}_{22}\text{F}_2\text{NaO}_5^+$   $[\text{M}+\text{Na}]^+$ : 427.1333, found: 427.1330.

IR (film)  $\nu_{\text{max}}$  3035, 2986, 1742, 1456, 1390, 1272 , 1100, 1029, 907, 750, 697  $\text{cm}^{-1}$ .

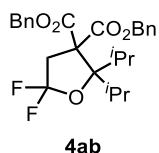

**benzyl 3-((benzylperoxy)-1,2-methyl)-5,5-difluoro-2,2-diisopropyltetrahydrofuran-3-carboxylate (4ab):**

Follow the general procedure (*GP2*), **4ab** was obtained as a colorless oil (62.7 mg, 0.14 mmol, yield: 68%) after flash chromatography (Petroleum ether/EtOAc = 50:1, CAM solution, UV): TLC  $R_f$  = 0.30;

$^1\text{H}$  NMR (400 MHz,  $\text{CDCl}_3$ )  $\delta$  7.38 – 7.31 (m, 6H), 7.31 – 7.26 (m, 4H), 5.13 (d,  $J = 2.8$  Hz, 4H), 3.13 (t,  $J = 8.7$  Hz, 2H), 2.39 (hept,  $J = 7.0$  Hz, 2H), 0.97 (d,  $J = 6.9$  Hz, 6H), 0.92 (d,  $J = 7.0$  Hz, 6H).

$^{13}\text{C}$  NMR (101 MHz,  $\text{CDCl}_3$ )  $\delta$  168.4 , 134.4 , 129.8 (t,  $J = 250.3$  Hz), 128.6 , 128.6 , 99.0 , 68.0 , 67.1 , 43.2 (t,  $J = 31.8$  Hz), 34.2 , 19.2 , 17.9 ppm;

$^{19}\text{F}$  NMR (376 MHz,  $\text{CDCl}_3$ )  $\delta$  -59.11 (t,  $J = 8.5$  Hz, 2F) ppm;

HRMS (ESI,  $m/z$ ): calculated for  $\text{C}_{26}\text{H}_{30}\text{F}_2\text{NaO}_5^+$   $[\text{M}+\text{Na}]^+$ : 483.1959, found: 483.1958.

IR (film)  $\nu_{\text{max}}$  2978, 1741, 1456, 1395, 1344, 1256, 1139, 1041, 1013, 907, 752, 697  $\text{cm}^{-1}$ .

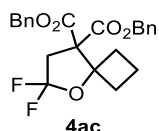

**dibenzyl 6,6-difluoro-5-oxaspiro[3.4]octane-8,8-dicarboxylate (4ac):** Follow the general procedure (*GPI*), **4ac** was obtained as a colorless oil (57.4 mg, 0.14 mmol, yield: 69%) after flash chromatography (Petroleum ether/EtOAc = 50:1, CAM solution, UV): TLC Rf = 0.25;

<sup>1</sup>H NMR (400 MHz, CDCl<sub>3</sub>) δ 7.36 – 7.31 (m, 6H), 7.30 – 7.26 (m, 4H), 5.20 (d, *J* = 12.1 Hz, 2H), 5.14 (d, *J* = 12.1 Hz, 2H), 3.01 (t, *J* = 9.1 Hz, 2H), 2.48 – 2.29 (m, 4H), 2.02 – 1.89 (m, 1H), 1.55 – 1.44 (m, 1H) ppm;

<sup>13</sup>C NMR (101 MHz, CDCl<sub>3</sub>) δ 166.7 , 134.6 , 129.3 (t, *J* = 255.2 Hz), 128.7 , 128.6 , 128.4 , 90.6 , 67.9 , 63.6 , 40.7 (t, *J* = 32.6 Hz), 31.4 , 14.1 ppm;

<sup>19</sup>F NMR (376 MHz, CDCl<sub>3</sub>) δ -62.0 (t, *J* = 9.3 Hz, 2F) ppm.

HRMS (ESI, *m/z*): calculated for C<sub>23</sub>H<sub>22</sub>F<sub>2</sub>NaO<sub>5</sub><sup>+</sup> [M+Na]<sup>+</sup>: 439.1333, found: 439.1337.

IR (film) ν<sub>max</sub> 2957, 1742, 1456, 1267, 1149, 1116, 1092, 1029, 908, 750, 697 cm<sup>-1</sup>.

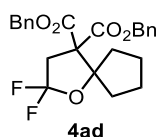

**dibenzyl 2,2-difluoro-1-oxaspiro[4.4]nonane-4,4-dicarboxylate (4ad):** Follow the general procedure (*GPI*), **4ad** was obtained as a colorless oil (73.1 mg, 0.17 mmol, yield: 85%) after flash chromatography (Petroleum ether/EtOAc = 50:1, CAM solution, UV): TLC Rf = 0.25;

<sup>1</sup>H NMR (400 MHz, CDCl<sub>3</sub>) δ 7.34 – 7.30 (m, 6H), 7.27 – 7.24 (m, 4H), 5.17 (d, *J* = 12.2 Hz, 2H), 5.12 (d, *J* = 12.2 Hz, 2H), 3.09 (t, *J* = 9.1 Hz, 2H), 2.09 – 1.97 (m, 2H), 1.84 – 1.65 (m, 4H), 1.55 – 1.46 (m, 2H) ppm;

<sup>13</sup>C NMR (101 MHz, CDCl<sub>3</sub>) δ 167.2 , 134.6 , 129.4 (t, *J* = 253.7 Hz), 128.6 , 128.4 , 97.8 , 67.8 , 64.0 , 42.2 (t, *J* = 32.7 Hz), 35.2 , 23.7 ppm;

<sup>19</sup>F NMR (376 MHz, CDCl<sub>3</sub>) δ -60.08 (t, *J* = 8.9 Hz, 2F) ppm.

HRMS (ESI, *m/z*): calculated for C<sub>24</sub>H<sub>24</sub>F<sub>2</sub>NaO<sub>5</sub><sup>+</sup> [M+Na]<sup>+</sup>: 453.1489, found: 453.1492.

IR (film) ν<sub>max</sub> 2962, 1742, 1455, 1331, 1266, 1157, 1095, 1030, 1013, 975, 908, 750, 697 cm<sup>-1</sup>.

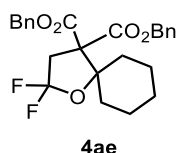

**dibenzyl 2,2-difluoro-1-oxaspiro[4.5]decane-4,4-dicarboxylate (4ae):** Follow the general procedure (*GPI*), **4ae** was obtained as a colorless oil (63.9 mg, 0.14 mmol, yield: 72%) after flash chromatography (Petroleum ether/EtOAc = 50:1, TLC Rf = 0.25, CAM solution, UV).

**<sup>1</sup>H NMR (400 MHz, CDCl<sub>3</sub>)** δ 7.38 – 7.29 (m, 6H), 7.28 (dd, *J* = 6.7, 3.1 Hz, 4H), 5.20 (d, *J* = 12.2 Hz, 2H), 5.13 (d, *J* = 12.2 Hz, 2H), 3.10 (t, *J* = 9.1 Hz, 2H), 1.80 (d, *J* = 9.5 Hz, 2H), 1.69 – 1.49 (m, 7H), 1.16 – 1.01 (m, 1H) ppm;

**<sup>13</sup>C NMR (101 MHz, CDCl<sub>3</sub>)** δ 167.3 , 134.6 , 129.6 (t, *J* = 253.7 Hz), 128.6 , 128.5 , 128.3 , 89.8 , 67.7 , 65.7 , 41.3 (t, *J* = 32.9 Hz), 32.0 , 24.8 , 21.9 ppm;

**<sup>19</sup>F NMR (376 MHz, CDCl<sub>3</sub>)** δ -58.92 (t, *J* = 9.1 Hz, 2F) ppm.

**HRMS (ESI, m/z):** calculated for C<sub>25</sub>H<sub>26</sub>F<sub>2</sub>NaO<sub>5</sub><sup>+</sup> [M+Na]<sup>+</sup>: 467.1646, found: 467.1644.

**IR (film)** ν<sub>max</sub> 3035, 2939, 2866, 1743, 1455, 1339, 1263, 1105, 1015, 958, 916, 833, 750, 697 cm<sup>-1</sup>.

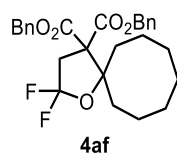

**dibenzyl 2,2-difluoro-1-oxaspiro[4.7]dodecane-4,4-dicarboxylate (4af):** Follow the general procedure (*GPI*), **4af** was obtained as a colorless oil (53.6 mg, 0.11 mmol, yield: 57%) after flash chromatography (Petroleum ether/EtOAc = 50:1, TLC R<sub>f</sub> = 0.25, CAM solution, UV);

**<sup>1</sup>H NMR (400 MHz, CDCl<sub>3</sub>)** δ 7.36 – 7.26 (m, 10H), 5.20 (d, *J* = 12.1 Hz, 2H), 5.12 (d, *J* = 12.1 Hz, 2H), 3.10 (t, *J* = 9.2 Hz, 2H), 1.85 (t, *J* = 5.5 Hz, 4H), 1.70 – 1.57 (m, 3H), 1.56 – 1.43 (m, 3H), 1.43 – 1.28 (m, 3H) ppm;

**<sup>13</sup>C NMR (101 MHz, CDCl<sub>3</sub>)** δ 167.8 , 134.5 , 129.5 (t, *J* = 253.4 Hz), 128.6 , 128.6 , 128.5 , 93.0 , 67.8 , 67.3 , 42.2 (t, *J* = 32.7 Hz), 32.0 , 27.5 , 23.7 , 21.0 ppm;

**<sup>19</sup>F NMR (376 MHz, CDCl<sub>3</sub>)** δ -58.91 (t, *J* = 9.2 Hz, 2F) ppm;

**HRMS (ESI, m/z):** calculated for C<sub>27</sub>H<sub>30</sub>F<sub>2</sub>NaO<sub>5</sub><sup>+</sup> [M+Na]<sup>+</sup>: 495.1959, found: 495.1961.

**IR (film)** ν<sub>max</sub> 3034, 2925, 1740, 1455, 1337, 1269, 1164, 1094, 1029, 908, 751, 697 cm<sup>-1</sup>.

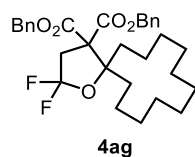

**dibenzyl 2,2-difluoro-1-oxaspiro[4.11]hexadecane-4,4-dicarboxylate (4ag):** Follow the general procedure (*GP2*), **4ag** was obtained as a colorless oil (70.7 mg, 0.13 mmol, yield: 67%) after flash chromatography (Petroleum ether/EtOAc = 50:1, TLC R<sub>f</sub> = 0.25);

**<sup>1</sup>H NMR (400 MHz, CDCl<sub>3</sub>)** δ 7.37 – 7.31 (m, 10H), 7.31 – 7.27 (m, 5H), 5.24 (d, *J* = 11.9 Hz, 2H), 5.06 (d, *J* = 11.9 Hz, 2H), 3.14 (t, *J* = 9.3 Hz, 2H), 1.69 – 1.61 (m, 6H), 1.37 – 1.23 (m, 5H), 1.22 – 1.10 (m, 12H).

**<sup>13</sup>C NMR (101 MHz, CDCl<sub>3</sub>)** δ 167.7 , 134.47 , 129.12 (t, *J* = 252.9 Hz), 128.85 , 128.71 , 128.62 , 93.52 , 67.88 , 66.12 , 42.85 (t, *J* = 33.0 Hz), 31.04 , 26.18 , 25.80 , 22.45 , 21.87 , 19.46 .

**<sup>19</sup>F NMR (376 MHz, CDCl<sub>3</sub>)** δ -59.79 (s, 2F) ppm;



**HRMS (ESI, m/z):** calculated for  $C_{31}H_{38}F_2NaO_5^+$   $[M+Na]^+$ : 551.2585, found: 551.2593.

**IR (film)**  $\nu_{max}$  2930, 2892, 1747, 1729, 1473, 1331, 1263, 1198, 1150, 1098, 1029, 945, 907, 752, 698  $cm^{-1}$ .

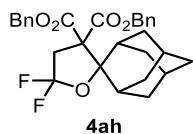

**dibenzyl (1r,3r,5r,7r)-5',5'-difluorodihydro-3'H-spiro[adamantane-2,2'-furan]-3',3'-dicarboxylate (4ah):** Follow the general procedure (*GPI*), **4ah** was obtained as a white solid (70.4 mg, 0.14 mmol, yield: 71%) after flash chromatography (Petroleum ether/EtOAc = 50:1, CAM solution, UV): TLC Rf = 0.25;

**$^1H$  NMR (400 MHz,  $CDCl_3$ )**  $\delta$  7.35 – 7.31 (m, 6H), 7.28 – 7.22 (m, 4H), 5.11 (s, 4H), 3.38 (t,  $J$  = 9.2 Hz, 2H), 2.61 (s, 2H), 2.26 (d,  $J$  = 11.4 Hz, 2H), 1.77 (d,  $J$  = 10.5 Hz, 3H), 1.64 (s, 2H), 1.62 – 1.53 (m, 5H).

**$^{13}C$  NMR (101 MHz,  $CDCl_3$ )**  $\delta$  167.1, 134.3, 128.6, 128.5, 128.3 (t,  $J$  = 277.5 Hz), 95.7, 68.1, 64.3, 43.5 (t,  $J$  = 32.2 Hz), 37.8, 34.7, 33.9, 33.3, 26.4, 25.9 ppm;

**$^{19}F$  NMR (376 MHz,  $CDCl_3$ )**  $\delta$  -61.28 (t,  $J$  = 9.2 Hz, 2F) ppm.

**HRMS (ESI, m/z):** calculated for  $C_{29}H_{30}F_2NaO_5^+$   $[M+Na]^+$ : 519.1959, found: 519.1960.

**IR (film)**  $\nu_{max}$  2923, 1731, 1455, 1330, 1248, 1223, 1188, 1056, 1027, 1005, 899, 749, 694  $cm^{-1}$ .

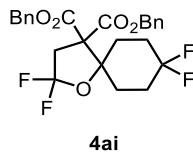

**dibenzyl 2,2,8,8-tetrafluoro-1-oxaspiro[4.5]decane-4,4-dicarboxylate (4ai):** Follow the general procedure (*GP2*), **4ai** was obtained as a colorless oil (68.2 mg, 0.14 mmol, yield: 71%) after flash chromatography (Petroleum ether/EtOAc = 50:1, TLC Rf = 0.25, CAM solution, UV);

**$^1H$  NMR (400 MHz,  $CDCl_3$ )**  $\delta$  7.36 – 7.31 (m, 4H), 7.29 – 7.25 (m, 3H), 5.20 (d,  $J$  = 12.1 Hz, 1H), 5.12 (d,  $J$  = 12.1 Hz, 1H), 3.12 (t,  $J$  = 9.2 Hz, 1H), 2.16 – 1.83 (m, 6H).

**$^{13}C$  NMR (101 MHz,  $CDCl_3$ )**  $\delta$  166.84, 134.27, 129.42 (t,  $J$  = 255.2 Hz), 128.73, 128.66, 128.45, 122.01 (dd,  $J$  = 243.4, 238.5 Hz), 87.22, 68.11, 64.58, 41.34 (t,  $J$  = 32.6 Hz), 29.67 (t,  $J$  = 25.0 Hz), 28.69, 28.59.

**$^{19}F$  NMR (376 MHz,  $CDCl_3$ )**  $\delta$  -59.64 (t,  $J$  = 9.2 Hz), -93.52 (d,  $J$  = 237.4 Hz), -103.33 – -104.27 (m).

**HRMS (ESI, m/z):** calculated for  $C_{25}H_{24}F_4NaO_5^+$   $[M+Na]^+$ : 503.1458, found: 503.1463.

**IR (film)**  $\nu_{max}$  3035, 2951, 1742, 1456, 1390, 1266, 1171, 1111, 1078, 992, 911, 750, 698  $cm^{-1}$ .

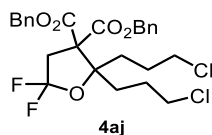

**dibenzyl 2,2-bis(3-chloropropyl)-5,5-difluorodihydrofuran-3,3(2H)-dicarboxylate (4aj):**

Follow the general procedure (*GPI*), **4aj** was obtained as a colorless oil (82.4 mg, 0.16 mmol, yield: 78%) after flash chromatography (Petroleum ether/EtOAc = 50:1, TLC Rf = 0.20, CAM solution, UV);

<sup>1</sup>H NMR (400 MHz, CDCl<sub>3</sub>) δ 7.37 – 7.32 (m, 7H), 7.31 – 7.26 (m, 4H), 5.20 (d, *J* = 12.0 Hz, 2H), 5.11 (d, *J* = 12.0 Hz, 2H), 3.31 (t, *J* = 5.7 Hz, 4H), 3.14 (t, *J* = 9.2 Hz, 2H), 1.94 – 1.71 (m, 6H) ppm;

<sup>13</sup>C NMR (101 MHz, CDCl<sub>3</sub>) δ 167.3 , 134.3 , 129.1 (t, *J* = 254.0 Hz), 128.8 , 128.8 , 128.7 , 91.4 , 68.2 , 66.2 , 44.8 , 42.1 (t, *J* = 32.5 Hz), 32.1 , 26.4 ppm;

<sup>19</sup>F NMR (376 MHz, CDCl<sub>3</sub>) δ -59.83 (s, 2F) ppm;

HRMS (ESI, *m/z*): calculated for C<sub>26</sub>H<sub>28</sub>Cl<sub>2</sub>F<sub>2</sub>NaO<sub>5</sub><sup>+</sup> [M+Na]<sup>+</sup>: 551.1180, found: 551.1176.

IR (film) ν<sub>max</sub> 3714, 3034, 2961, 1741, 1456, 1264, 1215, 1153, 1099, 752, 698 cm<sup>-1</sup>.

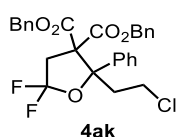

**dibenzyl 2-(2-chloroethyl)-5,5-difluoro-2-phenyldihydrofuran-3,3(2H)-dicarboxylate (4ak)**: Follow the general procedure (*GPI*), **4ak** was obtained as a colorless oil (86.4 mg, 0.17 mmol, yield: 84%) after flash chromatography (Petroleum ether/EtOAc = 50:1, TLC Rf = 0.25, CAM solution, UV);

<sup>1</sup>H NMR (400 MHz, CDCl<sub>3</sub>) δ 7.60 (dd, *J* = 6.7, 2.9 Hz, 2H), 7.34 – 7.19 (m, 11H), 6.93 (d, *J* = 6.4 Hz, 1H), 5.18 (d, *J* = 12.0 Hz, 1H), 5.13 (d, *J* = 12.0 Hz, 1H), 4.64 (d, *J* = 12.2 Hz, 1H), 4.29 (d, *J* = 12.2 Hz, 1H), 3.58 (td, *J* = 11.3, 4.9 Hz, 1H), 3.35 (ddd, *J* = 15.4, 9.5, 5.8 Hz, 1H), 3.22 – 3.10 (m, 2H), 3.03 (td, *J* = 11.2, 4.4 Hz, 1H), 2.42 (td, *J* = 12.7, 4.3 Hz, 1H) ppm;

<sup>13</sup>C NMR (101 MHz, CDCl<sub>3</sub>) δ 167.0 , 166.3 , 136.0 , 134.2 , 134.0 , 129.3 (t, *J* = 254.8 Hz), 128.8 , 128.7 , 128.6 , 128.5 , 128.4 , 128.2 , 128.2 , 126.1 , 91.7 , 68.2 , 67.9 , 67.4 , 41.7 (dd, *J* = 35.0, 29.3 Hz), 40.4 , 39.0 ppm;

<sup>19</sup>F NMR (376 MHz, CDCl<sub>3</sub>) δ -54.40 (ddd, *J* = 145.9, 11.4, 5.6 Hz, 1F), -65.17 (dt, *J* = 145.8, 10.4 Hz, 1F) ppm.

HRMS (ESI, *m/z*): calculated for C<sub>28</sub>H<sub>25</sub>ClF<sub>2</sub>NaO<sub>5</sub><sup>+</sup> [M+Na]<sup>+</sup>: 537.1256, found: 537.1258.

IR (film) ν<sub>max</sub> 3034, 1740, 1498, 1456, 1342, 1269, 1168, 1108, 1049, 1029, 947, 909, 750, 696 cm<sup>-1</sup>.

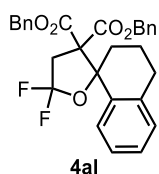

**dibenzyl 5,5-difluoro-3',4,4',5-tetrahydro-2'H,3H-spiro[furan-2,1'-naphthalene]-3,3-dicarboxylate (4al)**: Follow the general procedure (*GPI*), **4al** was obtained as a colorless oil (68.9 mg, 0.14 mmol, yield: 70%) after flash chromatography (Petroleum ether/EtOAc = 50:1, TLC Rf = 0.25, CAM solution, UV);

<sup>1</sup>H NMR (400 MHz, CDCl<sub>3</sub>) δ 7.36 – 7.30 (m, 5H), 7.28 (d, *J* = 7.3 Hz, 2H), 7.25 – 7.10 (m, 4H), 6.99 (d, *J*

= 7.2 Hz, 1H), 6.85 (d,  $J = 6.9$  Hz, 2H), 5.30 (d,  $J = 12.1$  Hz, 1H), 5.15 (d,  $J = 12.2$  Hz, 1H), 4.77 (d,  $J = 11.9$  Hz, 1H), 4.34 (d,  $J = 11.9$  Hz, 1H), 3.72 (ddd,  $J = 15.8, 13.7, 9.7$  Hz, 1H), 3.25 (ddd,  $J = 15.9, 8.9, 2.6$  Hz, 1H), 2.63 (dt,  $J = 16.7, 5.5$  Hz, 1H), 2.37 – 2.24 (m, 2H), 2.21 – 2.13 (m, 1H), 1.90 – 1.79 (m, 1H), 1.74 – 1.62 (m, 1H).

$^{13}\text{C}$  NMR (101 MHz,  $\text{CDCl}_3$ )  $\delta$  168.5, 167.3, 138.3, 136.4 (d,  $J = 2.0$  Hz), 134.4, 134.1, 130.4 (dd,  $J = 252.3, 255.5$  Hz), 129.5, 128.7, 128.6, 128.5, 128.4, 128.4, 128.3, 126.2, 125.8, 90.5, 68.1, 68.0, 68.0, 43.4 (t,  $J = 32.2$  Hz), 34.4, 29.3, 19.2 ppm;

$^{19}\text{F}$  NMR (376 MHz,  $\text{CDCl}_3$ )  $\delta$  -57.24 (ddd,  $J = 145.9, 14.0, 9.1$  Hz, 1F), -59.58 (dd,  $J = 145.7, 9.2$  Hz, 1F) ppm.

HRMS (ESI,  $m/z$ ): calculated for  $\text{C}_{29}\text{H}_{26}\text{F}_2\text{NaO}_5^+$   $[\text{M}+\text{Na}]^+$ : 515.1646, found: 515.1646.

IR (film)  $\nu_{\text{max}}$  3726, 3034, 2943, 1741, 1455, 1274, 1109, 1045, 909, 752, 697  $\text{cm}^{-1}$ .

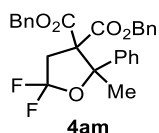

**dibenzyl 5,5-difluoro-2-methyl-2-phenyldihydrofuran-3,3(2H)-dicarboxylate (4am):** Follow the general procedure (*GPI*), **4am** was obtained as a colorless oil (65.2 mg, 0.14 mmol, yield: 72%) after flash chromatography (Petroleum ether/EtOAc = 50:1, TLC  $R_f = 0.25$ , CAM solution, UV);

$^1\text{H}$  NMR (400 MHz,  $\text{CDCl}_3$ )  $\delta$  7.64 – 7.58 (m, 2H), 7.34 – 7.20 (m, 11H), 6.95 (dd,  $J = 7.6, 1.5$  Hz, 2H), 5.18 (d,  $J = 12.1$  Hz, 1H), 5.13 (d,  $J = 12.0$  Hz, 1H), 4.69 (d,  $J = 12.2$  Hz, 1H), 4.36 (d,  $J = 12.2$  Hz, 1H), 3.34 (ddd,  $J = 15.2, 9.4, 5.7$  Hz, 1H), 3.19 (dt,  $J = 15.4, 10.8$  Hz, 1H), 1.89 (s, 3H) ppm;

$^{13}\text{C}$  NMR (101 MHz,  $\text{CDCl}_3$ )  $\delta$  167.5, 166.9, 139.5, 134.4, 134.2, 129.4 (t,  $J = 253.5$  Hz), 128.7, 128.6, 128.5, 128.3, 128.3, 128.1, 127.8, 125.8, 91.0, 68.0, 67.8, 67.2, 42.0 (dd,  $J = 35.4, 29.6$  Hz), 26.1 ppm;

$^{19}\text{F}$  NMR (376 MHz,  $\text{CDCl}_3$ )  $\delta$  -53.48 – -54.01 (m, 1F), -64.46 (dt,  $J = 145.8, 10.8$  Hz, 1F) ppm.

HRMS (ESI,  $m/z$ ): calculated for  $\text{C}_{27}\text{H}_{24}\text{F}_2\text{NaO}_5^+$   $[\text{M}+\text{Na}]^+$ : 489.1489, found: 489.1492.

IR (film)  $\nu_{\text{max}}$  3034, 1741, 1456, 1343, 1243, 1169, 1110, 1025, 908, 765, 740, 697  $\text{cm}^{-1}$ .

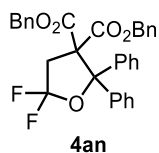

**dibenzyl 5,5-difluoro-2,2-diphenyldihydrofuran-3,3(2H)-dicarboxylate (4an):** Follow the general procedure (*GPI*), **4an** was obtained as a colorless oil (53.9 mg, 0.10 mmol, yield: 51%) after flash chromatography (Petroleum ether/EtOAc = 50:1, TLC  $R_f = 0.25$ , CAM solution, UV);

$^1\text{H}$  NMR (400 MHz,  $\text{CDCl}_3$ )  $\delta$  7.43 (dd,  $J = 8.0, 1.6$  Hz, 4H), 7.34 – 7.25 (m, 6H), 7.24 – 7.17 (m, 6H), 7.08 – 7.03 (m, 4H), 4.85 (d,  $J = 12.0$  Hz, 2H), 4.80 (d,  $J = 12.0$  Hz, 2H), 3.40 (t,  $J = 8.8$  Hz, 2H) ppm;

$^{13}\text{C}$  NMR (101 MHz,  $\text{CDCl}_3$ )  $\delta$  167.5, 140.6, 134.1, 130.0 (t,  $J = 253.6$  Hz), 128.5, 128.5, 128.0, 127.9,

127.1 , 95.2 , 68.3 , 68.2 , 42.9 (t,  $J = 31.3$  Hz) ppm;

$^{19}\text{F}$  NMR (376 MHz,  $\text{CDCl}_3$ )  $\delta$  -59.71 (t,  $J = 8.9$  Hz, 2F) ppm.

HRMS (ESI, m/z): calculated for  $\text{C}_{32}\text{H}_{26}\text{F}_2\text{NaO}_5^+$  [ $\text{M}+\text{Na}$ ] $^+$ : 551.1646, found: 551.1651.

IR (film)  $\nu_{\text{max}}$  3066, 3034, 2957, 1741, 1722, 1497, 1448, 1379, 1347, 1292, 1146, 1055, 935, 898, 750, 697, 624  $\text{cm}^{-1}$ .

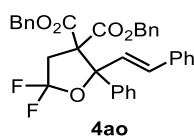

**dibenzyl (E)-5,5-difluoro-2-phenyl-2-styryldihydrofuran-3,3(2H)-dicarboxylate (4ao):** Follow the general procedure (*GPI*), **4ao** was obtained as a colorless oil (33.2 mg, 0.06 mmol, yield: 30%) after flash chromatography (Petroleum ether/EtOAc = 20:1, TLC  $R_f$  = 0.30,  $\text{KMnO}_4$ , UV);

$^1\text{H}$  NMR (400 MHz,  $\text{CDCl}_3$ )  $\delta$  7.73 – 7.64 (m, 2H), 7.32 – 7.20 (m, 16H), 7.00 (dd,  $J = 7.6, 1.8$  Hz, 2H), 6.83 (s, 2H), 5.22 (d,  $J = 12.0$  Hz, 1H), 5.12 (d,  $J = 12.0$  Hz, 1H), 4.71 (d,  $J = 12.2$  Hz, 1H), 4.50 (d,  $J = 12.1$  Hz, 1H), 3.29 – 3.14 (m, 2H) ppm;

$^{13}\text{C}$  NMR (101 MHz,  $\text{CDCl}_3$ )  $\delta$  167.2 , 166.7 , 138.8 (d,  $J = 2.5$  Hz), 136.0 , 134.4 , 134.2 , 131.4 , 129.7 (dd,  $J = 255.2, 252.8$  Hz), 128.7 , 128.7 , 128.6 , 128.5 , 128.4 , 128.4 , 128.2 , 128.1 , 128.1 , 128.0 , 127.85 , 127.8 , 126.9 , 126.0 , 92.3 , 68.2 , 67.9 , 41.1 (dd,  $J = 33.3, 29.3$  Hz) ppm;

$^{19}\text{F}$  NMR (376 MHz,  $\text{CDCl}_3$ )  $\delta$  -57.55 (dd,  $J = 140.6, 8.4$  Hz, 1F), -60.89 – -61.48 (m, 1F) ppm.

HRMS (ESI, m/z): calculated for  $\text{C}_{34}\text{H}_{28}\text{F}_2\text{NaO}_5^+$  [ $\text{M}+\text{Na}$ ] $^+$ : 577.1803, found: 577.1808.

IR (film)  $\nu_{\text{max}}$  3062, 3032, 1742, 1449, 1344, 1263, 1241, 1161, 1111, 746, 695  $\text{cm}^{-1}$ .

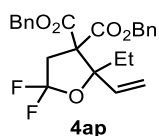

**benzyl 3-((benzylperoxy)-1(2-methyl)-2-ethyl-5,5-difluoro-2-vinyltetrahydrofuran-3-carboxylate (4ap):** Follow the general procedure (*GPI*), **4ap** was obtained as a colorless oil (55.0 mg, 0.13 mmol, yield: 64%) after flash chromatography (Petroleum ether/EtOAc = 50:1, TLC  $R_f$  = 0.25,  $\text{KMnO}_4$ , UV);

$^1\text{H}$  NMR (400 MHz,  $\text{CDCl}_3$ )  $\delta$  7.34 – 7.30 (m, 6H), 7.28 – 7.24 (m, 4H), 5.76 (dd,  $J = 17.2, 11.1$  Hz, 1H), 5.39 (dd,  $J = 17.1, 1.2$  Hz, 1H), 5.20 – 5.02 (m, 5H), 3.08 (td,  $J = 9.1, 1.4$  Hz, 2H), 1.86 – 1.68 (m, 2H), 0.83 (t,  $J = 7.3$  Hz, 3H) ppm;

$^{13}\text{C}$  NMR (101 MHz,  $\text{CDCl}_3$ )  $\delta$  167.3 , 167.0 , 134.6 (d,  $J = 3.8$  Hz), 134.0 (d,  $J = 1.6$  Hz), 129.7 (t,  $J = 255.3$  Hz), 128.6 , 128.5 , 128.5 , 128.4 , 128.4 , 117.5 , 91.9 , 67.9 , 67.9 , 66.3 , 40.8 (dd,  $J = 33.8, 30.7$  Hz), 28.1 , 7.5 .

$^{19}\text{F}$  NMR (376 MHz,  $\text{CDCl}_3$ )  $\delta$  -56.43 (dt,  $J = 146.1, 9.0$  Hz, 1F), -62.92 (dt,  $J = 146.1, 8.9$  Hz, 1F) ppm.

**HRMS (ESI, m/z):** calculated for  $C_{24}H_{24}F_2NaO_5^+$   $[M+Na]^+$ : 453.1489, found: 453.1494.

**IR (film)**  $\nu_{max}$  2939, 1742, 1456, 1282, 1266, 1102, 1041, 939, 907, 698  $cm^{-1}$ .

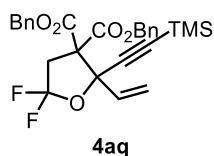

**dibenzyl 5,5-difluoro-2-((trimethylsilyl)ethynyl)-2-vinyldihydrofuran-3,3(2H)-dicarboxylate (4aq):** Follow the general procedure (*GPI*), **4aq** was obtained as a colorless oil (64.7 mg, 0.13 mmol, yield: 65%) after flash chromatography (Petroleum ether/EtOAc = 50:1, TLC Rf = 0.25,  $KMnO_4$ , UV);

**$^1H$  NMR (400 MHz,  $CDCl_3$ )**  $\delta$  7.34 – 7.22 (m, 10H), 6.05 (dd,  $J$  = 17.0, 10.6 Hz, 1H), 5.61 (d,  $J$  = 17.0 Hz, 1H), 5.24 – 5.05 (m, 5H), 3.35 (ddd,  $J$  = 15.2, 12.6, 10.5 Hz, 1H), 3.13 – 3.03 (m, 1H), 0.14 (s, 9H) ppm;

**$^{13}C$  NMR (101 MHz,  $CDCl_3$ )**  $\delta$  166.2, 166.1, 134.5, 134.4, 131.6, 129.7 (dd,  $J$  = 259.1, 255.4 Hz), 128.5, 128.5, 128.3, 128.1, 119.5, 99.1, 95.4, 84.0 (d,  $J$  = 2.4 Hz), 68.1, 68.0, 67.6, 41.2 (dd,  $J$  = 34.5, 29.3 Hz), -0.6 ppm;

**$^{19}F$  NMR (376 MHz,  $CDCl_3$ )**  $\delta$  -58.77 (ddd,  $J$  = 142.1, 10.4, 4.5 Hz, 1F), -62.20 (ddd,  $J$  = 142.6, 12.7, 9.6 Hz, 1F) ppm.

**HRMS (ESI, m/z):** calculated for  $C_{27}H_{28}F_2NaO_5Si^+$   $[M+Na]^+$ : 521.1572, found: 521.1575.

**IR (film)**  $\nu_{max}$  2961, 1745, 1456, 1336, 1272, 1238, 1157, 1112, 948, 849, 750, 697  $cm^{-1}$ .

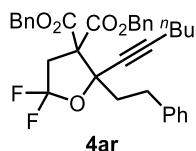

**benzyl 3-((benzylperoxy)-12-methyl)-5,5-difluoro-2-(hex-1-yn-1-yl)-2-phenethyltetrahydrofuran-3-carboxylate (4ar):** Follow the general procedure (*GPI*), **4ar** was obtained as a colorless oil (104.2 mg, 0.19 mmol, yield: 93%) after flash chromatography (Petroleum ether/EtOAc = 50:1, TLC Rf = 0.25,  $KMnO_4$ , UV);

**$^1H$  NMR (400 MHz,  $CDCl_3$ )**  $\delta$  7.38 – 7.16 (m, 15H), 7.05 (d,  $J$  = 7.0 Hz, 2H), 5.23 – 5.15 (m, 3H), 5.10 (d,  $J$  = 12.1 Hz, 1H), 3.36 (ddd,  $J$  = 15.1, 12.6, 10.6 Hz, 1H), 3.12 – 2.94 (m, 2H), 2.81 (td,  $J$  = 13.2, 4.8 Hz, 1H), 2.32 (td,  $J$  = 13.0, 4.2 Hz, 1H), 2.17 – 2.07 (m, 3H), 1.47 – 1.34 (m, 4H), 0.90 (t,  $J$  = 7.1 Hz, 3H) ppm;

**$^{13}C$  NMR (101 MHz,  $CDCl_3$ )**  $\delta$  166.8, 166.4, 141.2, 134.7, 134.4, 129.9 (dd,  $J$  = 258.6, 254.1 Hz), 128.6, 128.5, 128.45, 128.4, 128.4, 128.3, 128.3, 125.9, 90.8, 85.4 (d,  $J$  = 2.0 Hz), 75.7 (d,  $J$  = 2.5 Hz), 68.0, 66.9, 41.5 (dd,  $J$  = 34.6, 29.8 Hz), 38.0, 31.2, 30.2, 21.8, 18.2, 13.5 ppm;

**$^{19}F$  NMR (376 MHz,  $CDCl_3$ )**  $\delta$  -58.51 – -59.07 (m), -61.92 (dt,  $J$  = 143.1, 10.7 Hz) ppm.

**HRMS (ESI, m/z):** calculated for  $C_{34}H_{34}F_2NaO_5^+$   $[M+Na]^+$ : 583.2272, found: 583.2277.

**IR (film)**  $\nu_{max}$  2958, 2245, 1746, 1498, 1455, 1270, 1240, 1158, 1112, 1039, 950, 749, 698  $cm^{-1}$ .

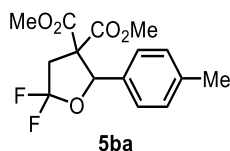

**dimethyl 5,5-difluoro-2-(p-tolyl)dihydrofuran-3,3(2H)-dicarboxylate (5ba):** Follow the general procedure (*GPI*), **5ba** was obtained as a colorless oil (59.7 mg, 0.19 mmol, yield: 95%) after flash chromatography (Petroleum ether/EtOAc = 50:1, TLC R<sub>f</sub> = 0.25, UV);

**<sup>1</sup>H NMR (400 MHz, CDCl<sub>3</sub>)** δ 7.23 (d, *J* = 8.2 Hz, 2H), 7.14 (d, *J* = 7.5 Hz, 2H), 6.09 (d, *J* = 3.6 Hz, 1H), 3.83 (s, 3H), 3.39 (ddd, *J* = 17.2, 14.9, 7.5 Hz, 1H), 3.26 (s, 3H), 2.90 (ddd, *J* = 14.9, 8.4, 2.8 Hz, 1H), 2.32 (s, 3H) ppm;

**<sup>13</sup>C NMR (101 MHz, CDCl<sub>3</sub>)** δ 169.0, 166.7, 138.9, 131.9 (d, *J* = 1.6 Hz), 130.2 (dd, *J* = 253.3, 256.5 Hz), 128.9, 126.3, 84.4, 53.6, 52.9, 40.1 (dd, *J* = 34.3, 30.2 Hz), 21.2 ppm;

**<sup>19</sup>F NMR (376 MHz, CDCl<sub>3</sub>)** δ -59.09 (ddd, *J* = 24.3, 18.0, 9.0 Hz, 1F), -72.08 – -72.56 (m, 1F) ppm;

**HRMS (ESI, m/z):** calculated for C<sub>15</sub>H<sub>16</sub>F<sub>2</sub>NaO<sub>5</sub><sup>+</sup> [M+Na]<sup>+</sup>: 337.0863, found: 337.0867.

**IR (film)** ν<sub>max</sub> 2957, 1743, 1518, 1437, 1337, 1280, 1256, 1209, 1161, 1115, 1060, 944, 800 cm<sup>-1</sup>.

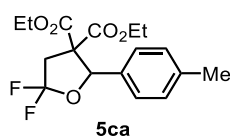

**diethyl 5,5-difluoro-2-(p-tolyl)dihydrofuran-3,3(2H)-dicarboxylate (5ca):** Follow the general procedure (*GPI*), **5ca** was obtained as a colorless oil (49.2 mg, 0.14 mmol, yield: 72%) after flash chromatography (Petroleum ether/EtOAc = 50:1, TLC R<sub>f</sub> = 0.25, UV);

**<sup>1</sup>H NMR (400 MHz, CDCl<sub>3</sub>)** δ 7.24 (d, *J* = 8.1 Hz, 2H), 7.13 (d, *J* = 7.9 Hz, 2H), 6.10 (d, *J* = 3.7 Hz, 1H), 4.37 – 4.21 (m, 2H), 3.80 (dq, *J* = 10.7, 7.2 Hz, 1H), 3.58 (dq, *J* = 10.7, 7.2 Hz, 1H), 3.40 (ddd, *J* = 17.4, 14.9, 7.6 Hz, 1H), 2.89 (ddd, *J* = 14.9, 8.4, 2.8 Hz, 1H), 2.31 (s, 3H), 1.27 (t, *J* = 7.1 Hz, 3H), 0.87 (t, *J* = 7.1 Hz, 3H) ppm;

**<sup>13</sup>C NMR (101 MHz, CDCl<sub>3</sub>)** δ 168.5, 166.3, 138.8, 132.0 (d, *J* = 2.0 Hz), 130.3 (d, *J* = 256.8, 253.7 Hz), 128.8, 126.5, 84.4, 63.4 (d, *J* = 2.8 Hz), 62.6, 62.2, 40.1 (dd, *J* = 33.8, 30.2 Hz), 21.1, 13.9, 13.3 ppm;

**<sup>19</sup>F NMR (376 MHz, CDCl<sub>3</sub>)** δ -59.06 (ddd, *J* = 144.0, 17.5, 8.4 Hz, 1F), -72.27 (ddt, *J* = 143.1, 6.2, 2.7 Hz, 1F) ppm.

**HRMS (ESI, m/z):** calculated for C<sub>17</sub>H<sub>20</sub>F<sub>2</sub>NaO<sub>5</sub><sup>+</sup> [M+Na]<sup>+</sup>: 365.1176, found: 365.1173.

**IR (film)** ν<sub>max</sub> 2985, 1740, 1518, 1447, 1369, 1336, 1271, 1204, 1161, 1109, 1059, 1019, 990, 863, 807 cm<sup>-1</sup>.

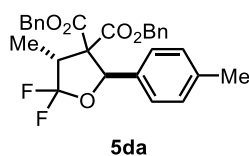

**dibenzyl 5,5-difluoro-4-methyl-2-(p-tolyl)dihydrofuran-3,3(2H)-dicarboxylate (5da)**: Follow the general procedure (*GPI*), **5da** was obtained as a white solid (70.0 mg, 0.15 mmol, yield: 73%, d.r.=8:1) after flash chromatography (Petroleum ether/EtOAc = 50:1, TLC Rf = 0.25, CAM solution, UV);

**<sup>1</sup>H NMR (400 MHz, CDCl<sub>3</sub>)** δ 7.34 – 7.21 (m, 8H), 7.15 (d, *J* = 8.1 Hz, 2H), 7.06 (d, *J* = 8.1 Hz, 2H), 6.94 (d, *J* = 6.9 Hz, 2H), 6.03 (d, *J* = 3.9 Hz, 1H), 5.18 (s, 2H), 4.75 (d, *J* = 12.1 Hz, 1H), 4.36 (d, *J* = 12.1 Hz, 1H), 3.60 (dp, *J* = 14.8, 7.3 Hz, 1H), 2.31 (s, 3H), 1.18 (d, *J* = 7.2 Hz, 3H) ppm;

**<sup>13</sup>C NMR (101 MHz, CDCl<sub>3</sub>)** δ 167.5 , 166.3 , 138.9 , 134.4 , 134.2 , 132.4 (d, *J* = 2.7 Hz), 130.5 (dd, *J* = 260.8, 252.2 Hz), 129.0 , 128.6 , 128.6 , 128.6 , 128.4 , 128.4 , 126.8 , 83.8 (d, *J* = 1.0 Hz), 68.1 , 67.8 , 66.70 (d, *J* = 3.9 Hz), 43.9 (t, *J* = 30.0 Hz), 21.2 , 9.4 (d, *J* = 4.8 Hz) ppm;

**<sup>19</sup>F NMR (376 MHz, CDCl<sub>3</sub>)** δ -71.64 (dd, *J* = 143.5, 14.8 Hz, 1F), -76.45 – -76.92 (m, 1F) ppm;

**HRMS (ESI, m/z)**: calculated for C<sub>28</sub>H<sub>26</sub>F<sub>2</sub>NaO<sub>5</sub><sup>+</sup> [M+Na]<sup>+</sup>: 503.1646, found: 503.1646.

**IR (film)** ν<sub>max</sub> 3032, 1735, 1456, 1387, 1338, 1269, 1246, 1203, 1135, 1058, 1016, 978, 906, 746, 696 cm<sup>-1</sup>.

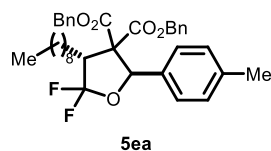

**dibenzyl 5,5-difluoro-4-nonyl-2-(p-tolyl)dihydrofuran-3,3(2H)-dicarboxylate(5ea)** : Follow the general procedure (*GPI*), **5ea** was obtained as a white solid (92.3 mg, 0.16 mmol, yield: 78%, d.r.=10:1) after flash chromatography (Petroleum ether/EtOAc = 50:1, TLC Rf = 0.25, CAM solution, UV);

**<sup>1</sup>H NMR (400 MHz, CDCl<sub>3</sub>)** δ 7.34 – 7.25 (m, 8H), 7.12 (d, *J* = 7.9 Hz, 2H), 7.06 (d, *J* = 8.1 Hz, 2H), 6.98 (d, *J* = 7.4 Hz, 2H), 5.99 (d, *J* = 2.7 Hz, 1H), 5.24 (d, *J* = 12.0 Hz, 1H), 5.13 (d, *J* = 12.0 Hz, 1H), 4.74 (d, *J* = 12.1 Hz, 1H), 4.37 (d, *J* = 12.1 Hz, 1H), 3.52 – 3.40 (m, 1H), 2.31 (s, 3H), 1.40 – 1.16 (m, 16H). 0.88 (t, *J* = 6.9 Hz, 3H) ppm;

**<sup>13</sup>C NMR (101 MHz, CDCl<sub>3</sub>)** δ 167.8 , 166.2 , 138.9 , 134.5 , 134.2 , 132.6 , 130.8 (dd, *J* = 260.0, 255.5 Hz), 129.0 , 128.7 , 128.6 , 128.6 , 128.4 , 126.9 , 83.9 , 68.1 , 67.8 , 66.7 , 66.6 , 48.2 (t, *J* = 28.4 Hz), 31.9 , 29.6 , 29.5 , 29.3 , 26.9 , 25.5 , 22.7 , 21.2 , 14.1 ppm;

**<sup>19</sup>F NMR (376 MHz, CDCl<sub>3</sub>)** δ -70.62 – -71.54 (m) ppm;

**HRMS (ESI, m/z)**: calculated for C<sub>36</sub>H<sub>43</sub>F<sub>2</sub>O<sub>5</sub><sup>+</sup> [M+H]<sup>+</sup>: 593.3079, found: 593.3069.

**IR (film)** ν<sub>max</sub> 2919, 2851, 1734, 1499, 1262, 1233, 1201, 1037, 744, 698 cm<sup>-1</sup>

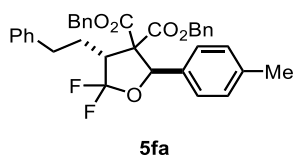

**dibenzyl 5,5-difluoro-4-phenethyl-2-(p-tolyl)dihydrofuran-3,3(2H)-dicarboxylate (5fa)** : Follow the general procedure (*GPI*), **5fa** was obtained as a white solid (100.0 mg, 0.18 mmol, yield: 88%, d.r.=7:1) after flash chromatography (Petroleum ether/EtOAc = 50:1, TLC Rf = 0.20, CAM solution, UV);

**<sup>1</sup>H NMR (400 MHz, CDCl<sub>3</sub>)** δ 7.33 – 7.24 (m, 7H), 7.19 (t, *J* = 7.3 Hz, 4H), 7.13 (d, *J* = 8.1 Hz, 2H), 7.06 (d, *J* = 7.9 Hz, 4H), 6.98 (d, *J* = 7.2 Hz, 2H), 6.03 (s, 1H), 5.22 (d, *J* = 11.9 Hz, 1H), 5.11 (d, *J* = 12.0 Hz, 1H), 4.76 (d, *J* = 12.1 Hz, 1H), 4.39 (d, *J* = 12.1 Hz, 1H), 3.57 (ddt, *J* = 15.0, 10.3, 4.9 Hz, 1H), 2.84 (td, *J* = 13.1, 4.7 Hz, 1H), 2.73 – 2.61 (m, 1H), 2.31 (s, 3H), 1.93 (ddd, *J* = 17.3, 11.3, 5.5 Hz, 1H), 1.82 – 1.68 (m, 1H) ppm;

**<sup>13</sup>C NMR (101 MHz, CDCl<sub>3</sub>)** δ 167.6, 166.1, 141.1, 138.9, 134.3, 134.14, 132.4, 130.7 (dd, *J* = 255.8, 258.3 Hz), 129.0, 128.8, 128.7, 128.6, 128.5, 128.4, 128.3, 128.3, 126.8, 126.0, 84.0, 68.3, 67.8, 66.6, 48.0 (t, *J* = 28.5 Hz), 33.1, 27.3, 21.2 ppm;

**<sup>19</sup>F NMR (376 MHz, CDCl<sub>3</sub>)** δ -70.69 (dd, *J* = 11.1, 6.7 Hz, 2F) ppm;

**HRMS (ESI, m/z):** calculated for C<sub>35</sub>H<sub>32</sub>F<sub>2</sub>NaO<sub>5</sub><sup>+</sup> [M+Na]<sup>+</sup>: 593.2116, found: 593.2123.

**IR (film)** ν<sub>max</sub> 3031, 1735, 1456, 1335, 1272, 1259, 1226, 1201, 1103, 1033, 975, 909, 752, 699 cm<sup>-1</sup>.

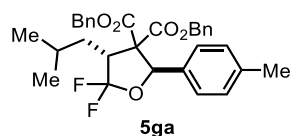

**dibenzyl 5,5-difluoro-4-isobutyl-2-(p-tolyl)dihydrofuran-3,3(2H)-dicarboxylate (5ga)** : Follow the general procedure (**GPI**), **5ga** was obtained as a white solid (41.8 mg, 0.08 mmol, yield: 40%, d.r.=50:1) after flash chromatography (Petroleum ether/EtOAc = 50:1, TLC R<sub>f</sub> = 0.25, CAM solution, UV);

**<sup>1</sup>H NMR (400 MHz, CDCl<sub>3</sub>)** δ 7.35 – 7.26 (m), 7.14 (d, *J* = 8.1 Hz), 7.07 (d, *J* = 8.0 Hz), 6.99 (d, *J* = 7.2 Hz), 5.99 (d, *J* = 3.6 Hz), 5.26 (d, *J* = 12.0 Hz), 5.15 (d, *J* = 12.0 Hz), 4.75 (d, *J* = 12.1 Hz), 4.38 (d, *J* = 12.1 Hz), 3.68 – 3.54 (m), 2.32 (s), 1.85 – 1.70 (m), 1.43 – 1.24 (m), 0.87 (dd, *J* = 13.9, 6.6 Hz) ppm;

**<sup>13</sup>C NMR (101 MHz, CDCl<sub>3</sub>)** δ 167.9, 166.3, 138.9, 134.5, 134.2, 132.6 (d, *J* = 2.6 Hz), 130.8 (dd, *J* = 253.2, 261.1 Hz), 129.0, 128.8, 128.7, 128.6, 128.5, 128.4, 126.9, 84.0, 68.1, 67.8, 66.7 (d, *J* = 4.2 Hz), 45.9 (t, *J* = 28.5 Hz), 34.2, 24.8, 23.5, 21.2, 21.1 ppm;

**<sup>19</sup>F NMR (376 MHz, CDCl<sub>3</sub>)** δ -70.84 (dd, *J* = 144.6, 15.0 Hz, 1F), -71.56 (ddd, *J* = 144.8, 8.1, 2.7 Hz, 1F) ppm;

**HRMS (ESI, m/z):** calculated for C<sub>31</sub>H<sub>32</sub>F<sub>2</sub>NaO<sub>5</sub><sup>+</sup> [M+Na]<sup>+</sup>: 545.2116, found: 545.2121.

**IR (film)** ν<sub>max</sub> 3037, 2961, 1735, 1500, 1469, 1379, 1279, 1231, 1200, 1166, 1123, 1089, 1053, 1040, 1020, 941, 902, 805, 744, 697, cm<sup>-1</sup>.

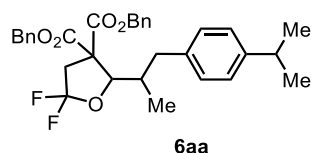

**dibenzyl 5,5-difluoro-2-(1-(4-isopropylphenyl)propan-2-yl)dihydrofuran-3,3(2H)-dicarboxylate (6aa):** Follow the general procedure, **6aa** was obtained as a colorless oil (69.7 mg, 0.13 mmol, yield: 65%, d.r.=1:1) after flash chromatography (Petroleum ether/EtOAc = 50:1, TLC R<sub>f</sub> = 0.25, CAM solution, UV);



**<sup>1</sup>H NMR (400 MHz, CDCl<sub>3</sub>)** δ 7.36 – 7.26 (m, 6H), 7.25 – 7.20 (m, 4H), 7.10 (d, *J* = 5.8 Hz, 2H), 6.94 (dd, *J* = 17.7, 7.1 Hz, 2H), 5.23 – 5.01 (m, 4.5H), 4.79 (dd, *J* = 7.5, 3.0 Hz, 0.5H), 3.42 – 3.20 (m, 1H), 2.96 – 2.81 (m, 2.5H), 2.73 (dd, *J* = 13.6, 5.5 Hz, 0.5H), 2.41 – 2.27 (m, 1H), 2.08 – 1.90 (m, 1H), 1.24 (d, *J* = 7.0 Hz, 6H), 0.76 (d, *J* = 6.6 Hz, 3H) ppm;

**<sup>13</sup>C NMR (101 MHz, CDCl<sub>3</sub>)** δ 168.4, 168.3, 167.0, 166.6, 146.6, 146.5, 136.7, 136.5, 134.6, 134.6, 134.3, 134.3, 130.1 (t, *J* = 254.5 Hz), 129.6 (t, *J* = 24.5 Hz), 129.3, 129.0, 128.8, 128.7, 128.6, 128.5, 128.3, 128.3, 126.3, 126.2, 87.8, 86.6, 68.2, 68.2, 68.2, 61.2, 61.2, 42.6 (dd, *J* = 35.1, 30.5 Hz), 41.4 (dd, *J* = 33.9, 31.3 Hz), 40.4, 37.9, 36.4, 33.7, 24.0, 15.7, 13.3 ppm;

**<sup>19</sup>F NMR (376 MHz, CDCl<sub>3</sub>)** δ -57.96 (ddd, *J* = 144.5, 16.6, 8.5 Hz, 0.5F), -59.98 (ddd, *J* = 143.9, 12.5, 10.4 Hz, 0.5F), -68.72 – -69.80 (m, 0.5F), -70.36 – -71.46 (m, 0.5F) ppm;

**HRMS (ESI, m/z):** calculated for C<sub>31</sub>H<sub>32</sub>F<sub>2</sub>NaO<sub>5</sub><sup>+</sup> [M+Na]<sup>+</sup>: 545.2116, found: 545.2114.

**IR (film)** ν<sub>max</sub> 2961, 1740, 1456, 1266, 1242, 1213, 1120, 1058, 750, 697 cm<sup>-1</sup>.

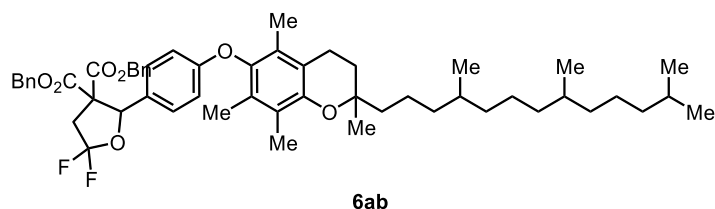

**dibenzyl 5,5-difluoro-2-(4-((2,5,7,8-tetramethyl-2-(4,8,12-trimethyltridecyl)chroman-6-yl)oxy)phenyl)dihydrofuran-3,3(2H)-dicarboxylate (6ab):** Follow the general procedure (**GP2**), **6ab** was obtained as a colorless (143.8 mg, 0.16 mmol, yield: 82%) after flash chromatography (Petroleum ether/EtOAc = 20:1, TLC R<sub>f</sub> = 0.30, UV);

**<sup>1</sup>H NMR (400 MHz, CDCl<sub>3</sub>)** δ 7.25 (ddd, *J* = 21.1, 14.7, 7.0 Hz, 10H), 6.98 (d, *J* = 6.4 Hz, 2H), 6.70 (d, *J* = 8.7 Hz, 2H), 6.11 (d, *J* = 3.3 Hz, 1H), 5.18 (d, *J* = 2.6 Hz, 2H), 4.79 (d, *J* = 12.2 Hz, 1H), 4.36 (d, *J* = 12.2 Hz, 1H), 3.53 – 3.37 (m, 1H), 2.92 (ddd, *J* = 14.9, 8.5, 2.9 Hz, 1H), 2.59 (t, *J* = 6.7 Hz, 2H), 2.12 (s, 3H), 1.95 (s, 3H), 1.91 (s, 3H), 1.89 – 1.78 (m, 2H), 1.66 – 1.37 (m, 7H), 1.34 – 1.22 (m, 11H), 1.19 – 1.04 (m, 7H), 0.88 (t, *J* = 6.6 Hz, 12H) ppm;

**<sup>13</sup>C NMR (101 MHz, CDCl<sub>3</sub>)** δ 168.2, 166.2, 159.4, 148.8, 143.1, 134.5, 134.1, 130.0 (dd, *J* = 256.9, 253.9 Hz), 128.6, 128.6, 128.5, 128.4, 128.4, 128.1, 128.0, 127.9, 127.0, 126.0, 123.3, 117.9, 114.5, 84.3, 75.0, 68.3, 67.9, 63.6, 63.5, 40.3 (dd, *J* = 34.1, 30.5 Hz), 39.96, 39.33, 37.6, 37.4, 37.4, 37.3, 32.8, 32.7, 31.2, 31.2, 27.95, 24.79, 24.42, 23.8, 23.8, 22.7, 22.6, 21.0, 20.6, 19.7 (t, *J* = 6.9 Hz), 12.8, 11.9, 11.8 ppm;

**<sup>19</sup>F NMR (376 MHz, CDCl<sub>3</sub>)** δ -59.19 (ddd, *J* = 144.0, 16.9, 8.6 Hz, 1F), -71.75 – -72.23 (m, 1F) ppm;

**HRMS (ESI, m/z):** calculated for C<sub>55</sub>H<sub>70</sub>F<sub>2</sub>NaO<sub>7</sub><sup>+</sup> [M+Na]<sup>+</sup>: 903.4987, found: 903.4991.

**IR (film)** ν<sub>max</sub> 2927, 2867, 1740, 1611, 1507, 1456, 1411, 1378, 1251, 1161, 1110, 1052, 939, 911, 737, 696 cm<sup>-1</sup>.

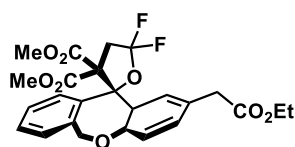

**6bc**

**dimethyl 2-(2-ethoxy-2-oxoethyl)-5',5'-difluoro-4',5'-dihydro-3'H,6H-spiro[dibenzo[b,e]oxepine-11,2'-furan]-3',3'-dicarboxylate (6bc):** Follow the general procedure (*GPI*), **6bc** was obtained as a colorless oil (29.4 mg, 0.06 mmol, yield: 30%) after flash chromatography (Petroleum ether/EtOAc = 5:1, TLC Rf = 0.10, CAM solution, UV);

**<sup>1</sup>H NMR (400 MHz, CDCl<sub>3</sub>)** δ 7.83 – 7.78 (m, 1H), 7.51 (d, *J* = 2.1 Hz, 1H), 7.27 – 7.19 (m, 3H), 7.04 (d, *J* = 8.1 Hz, 1H), 6.91 – 6.87 (m, 1H), 5.40 (d, *J* = 15.5 Hz, 1H), 4.94 (d, *J* = 15.5 Hz, 1H), 4.11 (q, *J* = 7.1 Hz, 2H), 3.58 (d, *J* = 3.5 Hz, 2H), 3.55 (s, 3H), 3.48 (s, 3H), 3.31 (dt, *J* = 14.5, 7.4 Hz, 1H), 3.18 (dt, *J* = 14.3, 9.4 Hz, 1H), 1.23 (t, *J* = 7.1 Hz, 3H) ppm;

**<sup>13</sup>C NMR (101 MHz, CDCl<sub>3</sub>)** δ 171.4, 167.4, 167.2, 152.9, 136.8, 136.6, 135.1, 131.0, 130.7, 129.7 (t, *J* = 253.7 Hz), 128.5, 126.6, 126.4, 126.1, 125.3, 121.1, 94.0, 73.0, 67.1, 60.9, 53.0, 52.9, 42.3 (t, *J* = 29.9 Hz), 41.0, 14.1 ppm;

**<sup>19</sup>F NMR (376 MHz, CDCl<sub>3</sub>)** δ -64.14 – -64.23 (m, 2F) ppm;

**HRMS (ESI, m/z):** calculated for C<sub>25</sub>H<sub>24</sub>F<sub>2</sub>NaO<sub>8</sub><sup>+</sup> [M+Na]<sup>+</sup>: 513.1337, found: 513.1335.

**IR (film)** ν<sub>max</sub> 2953, 1739, 1499, 1434, 1340, 1251, 1146, 1103, 1031, 946, 772, 756 cm<sup>-1</sup>.

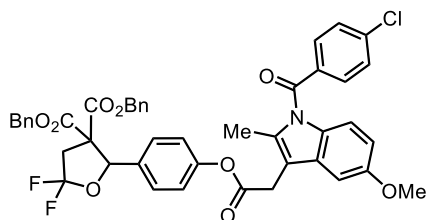

**6ad**

**dibenzyl 2-(4-(2-(1-(4-chlorobenzoyl)-5-methoxy-2-methyl-1H-indol-3-yl)acetoxyl)phenyl)-5,5-difluorodihydrofuran-3,3(2H)-dicarboxylate (6ad):** Follow the general procedure (*GPI*), **6ad** was obtained as a colorless oil (114.6 mg, 0.14 mmol, yield: 71%) after flash chromatography (Petroleum ether/EtOAc = 5:1, TLC Rf = 0.25, UV);

**<sup>1</sup>H NMR (400 MHz, CDCl<sub>3</sub>)** δ 7.68 (d, *J* = 8.4 Hz, 2H), 7.47 (d, *J* = 8.4 Hz, 2H), 7.36 – 7.29 (m, 5H), 7.22 – 7.17 (m, 5H), 7.06 (d, *J* = 2.5 Hz, 1H), 6.98 (d, *J* = 8.6 Hz, 2H), 6.93 (d, *J* = 6.3 Hz, 2H), 6.90 (d, *J* = 9.0 Hz, 1H), 6.71 (dd, *J* = 9.0, 2.5 Hz, 1H), 6.11 (d, *J* = 3.3 Hz, 1H), 5.22 – 5.12 (m, 2H), 4.73 (d, *J* = 12.1 Hz, 1H), 4.40 (d, *J* = 12.1 Hz, 1H), 3.91 (s, 2H), 3.83 (s, 3H), 3.43 (td, *J* = 15.6, 7.7 Hz, 1H), 2.92 (ddd, *J* = 14.9, 8.8, 3.7 Hz, 1H), 2.47 (s, 3H) ppm;

**<sup>13</sup>C NMR (101 MHz, CDCl<sub>3</sub>)** δ 168.9, 168.2, 168.0, 166.1, 156.1, 151.1, 139.3, 136.2, 134.4, 134.0, 133.7, 132.4, 131.2, 130.8, 130.4, 130.0 (dd, *J* = 257.6, 254.8 Hz), 129.1, 128.7, 128.6, 128.4, 127.7, 121.3, 115.0, 111.8, 111.7, 101.2, 83.7, 68.4, 68.1, 63.6, 63.5, 55.7, 40.4 (dd, *J* = 34.4, 30.2 Hz), 30.5, 13.4 ppm;

<sup>19</sup>F NMR (376 MHz, CDCl<sub>3</sub>) δ -59.47 (ddd, *J* = 143.8, 16.1, 8.8 Hz, 1F), -71.73 (ddt, *J* = 143.5, 7.3, 3.0 Hz, 1F) ppm;

HRMS (ESI, *m/z*): calculated for C<sub>45</sub>H<sub>36</sub>ClF<sub>2</sub>NNaO<sub>9</sub><sup>+</sup> [M+Na]<sup>+</sup>: 830.1944, found: 830.1949.

IR (film)  $\nu_{\max}$  3034, 2957, 1738, 1683, 1508, 1478, 1456, 1323, 1122, 1014, 926, 834, 753, 697 cm<sup>-1</sup>.

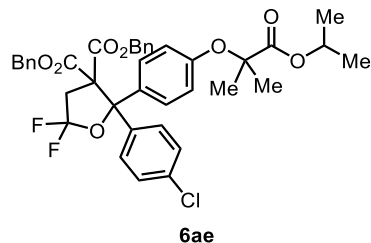

**dibenzyl 2-(4-chlorophenyl)-5,5-difluoro-2-(4-((1-isopropoxy-2-methyl-1-oxopropan-2-yl)oxy)phenyl)dihydrofuran-3,3(2H)-dicarboxylate (6ae):** Follow the general procedure (*GPI*), **6ae** was obtained as a colorless oil (64.9 mg, 0.09 mmol, yield: 46%) after flash chromatography (Petroleum ether/EtOAc = 20:1, TLC R<sub>f</sub> = 0.2, CAM solution, UV);

<sup>1</sup>H NMR (400 MHz, CDCl<sub>3</sub>) δ 7.37 – 7.28 (m, 8H), 7.17 (d, *J* = 9.0 Hz, 2H), 7.11 – 7.02 (m, 6H), 6.66 (d, *J* = 9.0 Hz, 2H), 5.04 (hept, *J* = 6.3 Hz, 1H), 4.90 – 4.77 (m, 4H), 3.44 (dt, *J* = 15.5, 9.9 Hz, 1H), 3.28 (ddd, *J* = 15.5, 8.8, 6.5 Hz, 1H), 1.55 (s, 6H), 1.16 (d, *J* = 6.7 Hz, 6H) ppm;

<sup>13</sup>C NMR (101 MHz, CDCl<sub>3</sub>) δ 173.3, 167.5, 167.0, 155.5, 139.2, 129.9 (t, *J* = 253.7 Hz), 128.7, 128.6, 128.6, 128.5, 128.5, 128.5, 128.2, 127.8, 117.7, 94.5, 79.1, 69.0, 68.4, 68.3, 42.9 (t, *J* = 31.4 Hz), 25.3, 21.5 ppm;

<sup>19</sup>F NMR (376 MHz, CDCl<sub>3</sub>) δ -58.89 – -60.48 (m, 2F) ppm;

HRMS (ESI, *m/z*): calculated for C<sub>39</sub>H<sub>37</sub>ClF<sub>2</sub>NaO<sub>8</sub><sup>+</sup> [M+Na]<sup>+</sup>: 729.2043, found: 729.2045.

IR (film)  $\nu_{\max}$  2983, 1731, 1608, 1509, 1289, 1148, 1105, 1010, 934, 829, 750, 697 cm<sup>-1</sup>.

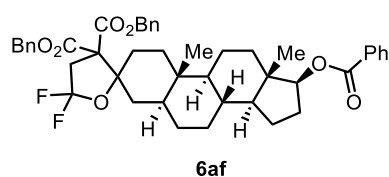

**dibenzyl (5S,8R,9S,10S,13S,14S,17S)-17-(benzoyloxy)-5',5'-difluoro-10,13-dimethyloctadecahydro-3'H-spiro[cyclopenta[a]phenanthrene-3,2'-furan]-3',3'-dicarboxylate (6af):** Follow the general procedure (*GPI*), **6af** was obtained as a colorless oil (85.9 mg, 0.12 mmol, yield: 58%) after flash chromatography (Petroleum ether/EtOAc = 5:1, TLC R<sub>f</sub> = 0.25, CAM solution, UV);

<sup>1</sup>H NMR (400 MHz, CDCl<sub>3</sub>) δ 8.03 (d, *J* = 7.2 Hz, 2H), 7.54 (t, *J* = 7.4 Hz, 1H), 7.42 (t, *J* = 7.7 Hz, 2H), 7.35 – 7.27 (m, 10H), 5.23 (dd, *J* = 14.7, 12.1 Hz, 2H), 5.10 (t, *J* = 12.1 Hz, 2H), 4.81 (t, *J* = 8.3 Hz, 1H), 3.09 (t, *J* = 9.0 Hz, 2H), 2.34 – 2.21 (m, 1H), 1.86 – 1.73 (m, 2H), 1.71 – 1.58 (m, 5H), 1.55 – 1.43 (m, 3H), 1.38 – 1.24 (m, 5H), 1.23 – 1.14 (m, 2H), 1.14 – 0.97 (m, 3H), 0.90 (s, 3H), 0.76 (m, 1H), 0.57 (s, 3H) ppm;

$^{13}\text{C}$  NMR (101 MHz,  $\text{CDCl}_3$ )  $\delta$  167.5, 167.4, 166.5, 134.6, 134.5, 132.7, 130.7, 129.6 (t,  $J = 254.5$  Hz), 129.5, 128.7, 128.6, 128.6, 128.5, 128.3, 90.2, 83.3, 67.8, 65.5, 53.4, 50.6, 43.0, 41.2 (t,  $J = 32.8$  Hz), 41.2, 36.9, 35.2, 35.1, 34.6, 34.0, 31.2, 28.0, 27.9, 27.67, 23.6, 20.4, 12.4, 11.3 ppm;

$^{19}\text{F}$  NMR (376 MHz,  $\text{CDCl}_3$ )  $\delta$  -58.07 (dt,  $J = 146.6, 8.8$  Hz, 1F), -59.00 (dt,  $J = 146.6, 9.0$  Hz, 1F) ppm;

HRMS (ESI,  $m/z$ ): calculated for  $\text{C}_{45}\text{H}_{50}\text{F}_2\text{NaO}_7^+$   $[\text{M}+\text{Na}]^+$ : 763.3422, found: 763.3428.

IR (film)  $\nu_{\text{max}}$  2029, 1741, 1716, 1451, 1276, 1115, 1099, 907, 7751, 712, 697  $\text{cm}^{-1}$ .

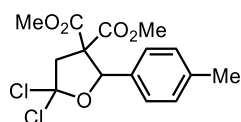

9

**dimethyl 5,5-dichloro-2-(p-tolyl)dihydrofuran-3,3(2H)-dicarboxylate (9)**: Follow the general procedure (GP3), **9** was obtained as a white solid (38.0 mg, 0.11 mmol, yield: 55%) after flash chromatography (Petroleum ether/EtOAc = 5:1, TLC  $R_f$  = 0.20, UV);

$^1\text{H}$  NMR (400 MHz,  $\text{CDCl}_3$ )  $\delta$  7.27 (d,  $J = 6.5$  Hz, 2H), 7.12 (d,  $J = 8.0$  Hz, 2H), 5.67 (s, 1H), 3.82 (s, 3H), 3.62 (s, 3H), 3.25 (d,  $J = 17.5$  Hz, 1H), 3.05 (d,  $J = 17.5$  Hz, 1H), 2.32 (s, 3H) ppm;

$^{13}\text{C}$  NMR (101 MHz,  $\text{CDCl}_3$ )  $\delta$  175.9, 168.1, 167.7, 139.1, 133.1, 128.8, 128.4, 63.4, 62.3, 53.3, 52.9, 35.3, 21.1 ppm;

HRMS (ESI,  $m/z$ ): calculated for  $\text{C}_{15}\text{H}_{16}\text{Cl}_2\text{NaO}_5^+$   $[\text{M}+\text{Na}]^+$ : 369.0272, found: 369.0280.

IR (film)  $\nu_{\text{max}}$  2952, 1742, 1714, 1500, 1430, 1413, 1309, 1288, 1249, 1195, 1065, 953, 889  $\text{cm}^{-1}$ .

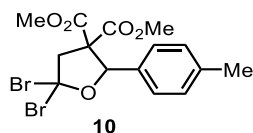

10

**dimethyl 5,5-dibromo-2-(p-tolyl)dihydrofuran-3,3(2H)-dicarboxylate(10)**: Follow the general procedure (GP3), **10** was obtained as a white solid (13.0 mg, 0.03 mmol, yield: 15%) after flash chromatography (Petroleum ether/EtOAc = 10:1, TLC  $R_f$  = 0.30, UV);

$^1\text{H}$  NMR (400 MHz,  $\text{CDCl}_3$ )  $\delta$  7.24 (d,  $J = 8.2$  Hz, 2H), 7.16 (d,  $J = 8.0$  Hz, 2H), 6.14 (s, 1H), 3.84 (s, 3H), 3.48 (d,  $J = 18.0$  Hz, 1H), 3.29 (s, 3H), 2.96 (d,  $J = 18.0$  Hz, 1H), 2.33 (s, 3H) ppm;

$^{13}\text{C}$  NMR (101 MHz,  $\text{CDCl}_3$ )  $\delta$  172.7, 168.8, 167.2, 139.1, 131.3, 129.0, 126.1, 82.4, 61.9, 53.6, 52.9, 36.2, 21.2 ppm;

HRMS (ESI,  $m/z$ ): calculated for  $\text{C}_{15}\text{H}_{16}\text{Br}_2\text{NaO}_5^+$   $[\text{M}+\text{Na}]^+$ : 456.9260, found: 456.9260.

IR (film)  $\nu_{\text{max}}$  2956, 1795, 1738, 1436, 1400, 1270, 1207, 1181, 1071, 1031,  $\text{cm}^{-1}$ .

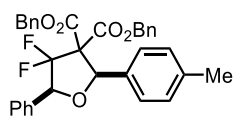

11

**dibenzyl 4,4-difluoro-5-phenyl-2-(p-tolyl)dihydrofuran-3,3(2H)-dicarboxylate(11)** : Follow the general procedure (**GP4**), **11** was obtained as a white solid (78.0 mg, 0.14 mmol, yield: 72%, d.r.> 50:1) after flash chromatography (Petroleum ether/EtOAc = 20:1, TLC Rf = 0.25, CAM solution, UV);

**<sup>1</sup>H NMR (400 MHz, CDCl<sub>3</sub>)** δ 7.62 – 7.57 (m, 2H), 7.54 (d, *J* = 8.1 Hz, 2H), 7.41 – 7.37 (m, 3H), 7.28 – 7.17 (m, 8H), 7.14 (d, *J* = 8.1 Hz, 2H), 6.81 (d, *J* = 7.5 Hz, 2H), 5.80 (s, 1H), 5.28 – 5.14 (m, 3H), 4.75 (d, *J* = 12.1 Hz, 1H), 4.50 (d, *J* = 12.1 Hz, 1H), 2.33 (s, 3H) ppm;

**<sup>13</sup>C NMR (101 MHz, CDCl<sub>3</sub>)** δ 164.7 (d, *J* = 3.9 Hz), 163.0 (d, *J* = 6.7 Hz), 138.7 , 134.7 , 134.1 , 132.7 , 131.7 , 128.9 , 128.8 , 128.4 , 128.3 , 128.2 , 128.0 , 127.8 , 126.9 , 126.5 (dd, *J* = 279.8, 249.2 Hz), 85.3 (dd, *J* = 35.2, 24.6 Hz), 81.6 (d, *J* = 2.9 Hz), 70.6 (dd, *J* = 24.7, 19.1 Hz), 67.9 , 67.6 , 21.3 ppm;

**<sup>19</sup>F NMR (376 MHz, CDCl<sub>3</sub>)** δ -88.24 (dd, *J* = 241.1, 20.4 Hz), -108.95 (dd, *J* = 241.0, 8.9 Hz) ppm;

**HRMS (ESI, m/z)**: calculated for C<sub>33</sub>H<sub>28</sub>F<sub>2</sub>NaO<sub>5</sub><sup>+</sup> [M+Na]<sup>+</sup>: 565.1803, found: 565.1809.

**IR (film)** ν<sub>max</sub> 3034, 1739, 1517, 1498, 1456, 1379, 1313, 1270, 1231, 1120, 1068, 1038, 997, 907, 749, 696 cm<sup>-1</sup>.

## 7. References:

- (1) A. Bugarin, K. D. Jones, B. T. Connell, *Chem. Commun.* 2010, **46**, 1715-1717.
- (2) F. Tian, V. Kruger, O. Bautista, J.-X. Duan, A.-R. Li, W. R. Dolbier and Q.-Y. Chen, *Org. Lett.*, 2000, **2**, 563-564.
- (3) F. de Nanteuil, J. Waser, *Angew. Chem. Int. Ed.* 2013, **52**, 9009-9013.
- (4) (a) A. Kazia, R. Melngaile, A. Mishnev and J. Veliks, *Org. Biomol. Chem.*, 2020, **18**, 1384-1388. (b) A. Sperga, R. Melngaile, A. Kazia, S. Belyakov and J. Veliks, *J. Org. Chem.*, 2021, **86**, 3196-3212.
- (5) M. S. Baird, V. M. Boitsov, A. V. Stepanov, A. P. Molchanov, J. Kopf, M. Rajaratnam, R. R. Kostikov, *Tetrahedron* 2007, **63**, 7717-7726.
- (6) S. Hajra, S. M. Aziz, R. Maji, *RSC Advances* 2013, **3**, 10185-10188.
- (7) Frischi, M. J.; Trucks, G. W.; Schlegel, H. B.; Scuseria, G. E.; Robb, M. A.; Cheeseman, J. R.; Scalmani, G.; Barone, V.; Mennucci, B.; Petersson, G. A.; Nakatsuji, H.; Caricato, M.; Li, X.; Hratchian, H. P.; Izmaylov, A. F.; Bloino, J.; Zheng, G.; Sonnenberg J. L.; Hada, M.; Ehara, M.; Toyota, K.; Fukuda, R.; Hasegawa, J.; Ishida, M.; Nakajima, T.; Honda, Y.; Kitao, O.; Nakai, H.; Vreven, T.; Montgomery, J. A.; Jr., Peralta, J. E.; Ogliaro, F.; Bearpark, M.; Heyd, J. J.; Brothers, E.; Kudin, K. N.; Staroverov, V. N.; Keith, T.; Kobayashi, R.; Normand, J.; Raghavachari, K.; Rendell, A.; Burant, J. C.; Iyengar, S. S.; Tomasi, J.; Cossi, M.; Rega, N.; Millam, J. M.; Klene, M.; Knox, J. E.; Cross, J. B.; Bakken, V.; Adamo, C.; Jaramillo, J.; Gomperts, R.; Stratmann, R. E.; Yazyev, O.; Austin, A. J.; Cammi, R.; Pomelli, C.; Ochterski, J. W.; Martin, R. L.; Morokuma, K.; Zakrzewski, V. G.; Voth, G. A.; Salvador, P.; Dannenberg, J. J.; Dapprich, S.; Daniels, A. D.; Farkas, O.; Foresman, J. B.; Ortiz, J. V.; Cioslowski, J.; Fox, D. J.; Gaussian 09, Revision D.01;
- (8) (a) A. D. Becke, *J. Chem. Phys.*, 1993, **98**, 5648-5652. (b) C. Lee, W. Yang and R. G. Parr, *Phys. Rev. B*, 1988, **37**, 785-789. (c) R. Peverati and D. G. Truhlar, *J. Phys. Chem. Lett.*, 2011, **2**, 2810-2817.
- (9) (a) M. Cossi, V. Barone, R. Cammi, J. Tomasi, *Chem. Phys. Lett.* 1996, **255**, 327-335. (b) B. Mennucci, E. Cancès, J. Tomasi, *J. Phys. Chem. B* 1997, **101**, 10506-10517.
- (10) Y. Zhao, D. G. Truhlar, *Theor. Chem. Acc.* 2008, **120**, 215-241.

## 8. NMR-Spectra of New Compounds

lhd-2234-1  
single\_pulse

7.26  
7.26  
7.25  
7.25  
7.24  
7.22  
7.22  
7.21  
7.20  
7.20  
7.19

5.13

2.29  
2.27  
2.25

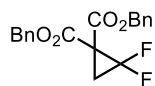

**1a**

<sup>1</sup>H NMR (400 MHz, CDCl<sub>3</sub>)

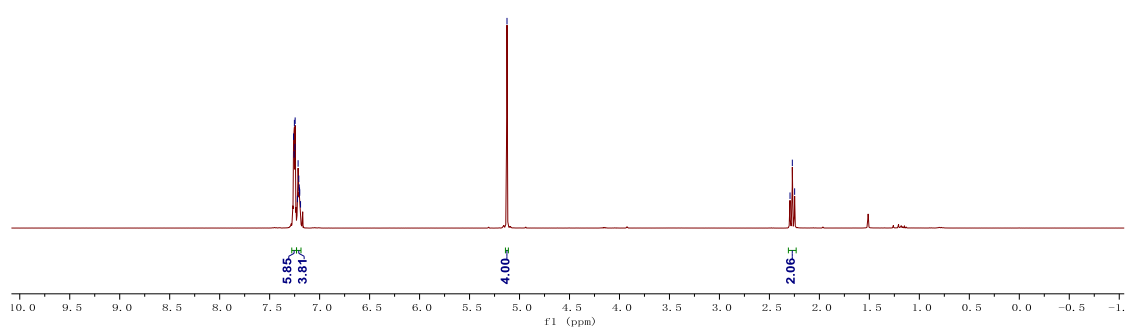

LHD-4132-3-2  
single\_pulse decoupled gated NOE

169.4

134.7

128.5

128.4

128.1

112.1

109.2

106.3

77.3

77.0

76.7

68.1

39.2

39.0

38.9

21.6

21.5

21.4

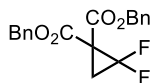

**1a**

<sup>13</sup>C NMR (101 MHz, CDCl<sub>3</sub>)

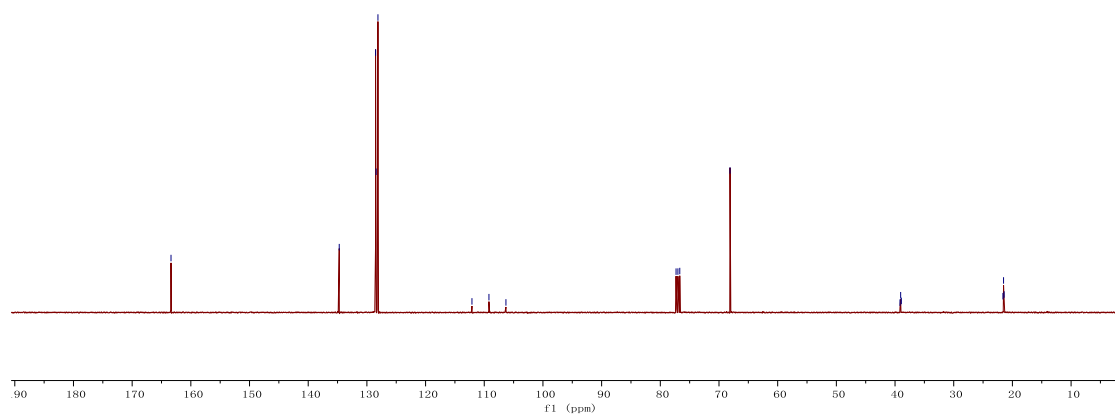

lhd-2234-1  
single\_pulse

-131.72  
-131.74  
-131.77

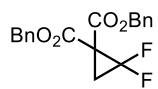

**1a**

<sup>19</sup>F NMR (376 MHz, CDCl<sub>3</sub>)

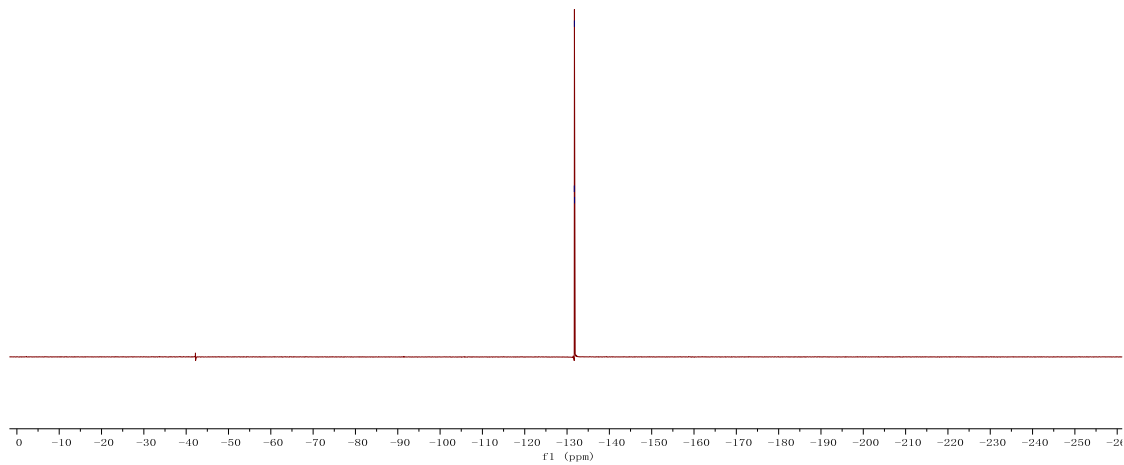

LHD-6043-5-1  
single\_pulse

-7.26 CDCl<sub>3</sub>

3.81

2.34  
2.32  
2.30

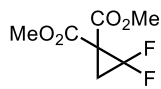

**1b**

<sup>1</sup>H NMR (400 MHz, CDCl<sub>3</sub>)

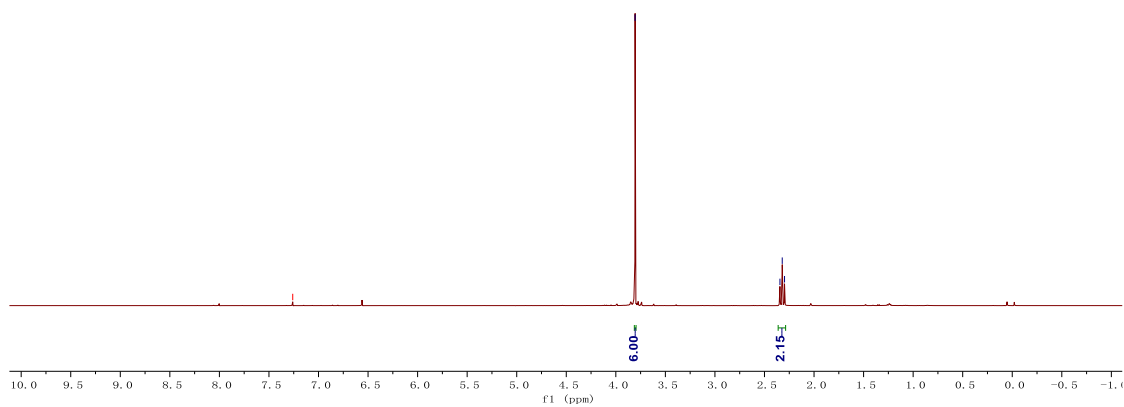



LHD-6043-5-1  
single pulse decoupled gated NOE

164.0

112.0  
109.1  
106.2

77.3 CDCl<sub>3</sub>  
77.0 CDCl<sub>3</sub>  
76.7 CDCl<sub>3</sub>

53.4

38.9  
38.8  
38.6

21.6  
21.5  
21.4

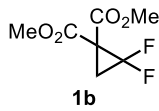

<sup>13</sup>C NMR (101 MHz, CDCl<sub>3</sub>)

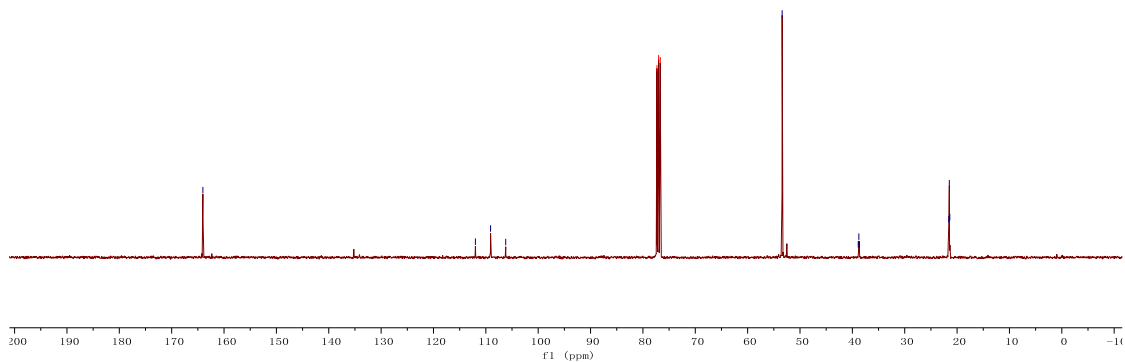

LHD-6043-5-1  
single\_pulse

-132.10  
-132.12  
-132.15

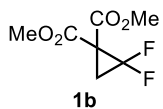

<sup>19</sup>F NMR (376 MHz, CDCl<sub>3</sub>)

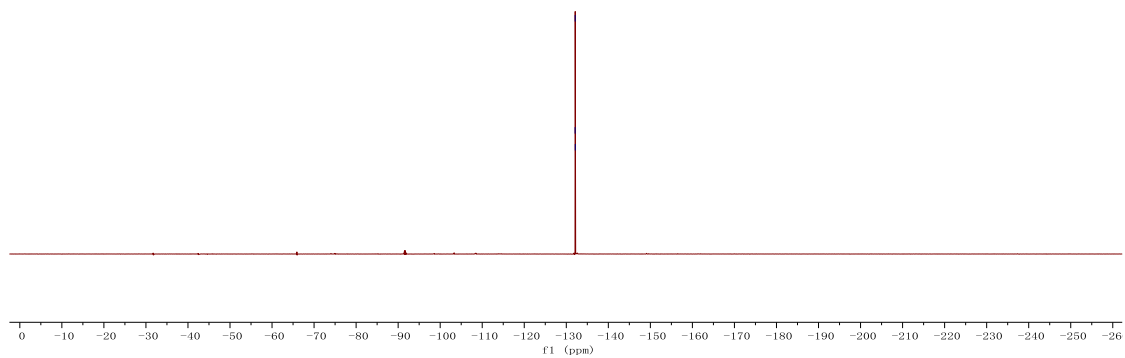

LHD-5177-3  
single\_pulse

— 7.26 CDCl<sub>3</sub>

4.24  
4.23  
4.22  
4.20  
4.18

2.25  
2.23  
2.21

1.26  
1.24  
1.23

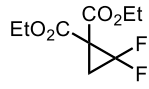

**1c**

<sup>1</sup>H NMR (400 MHz, CDCl<sub>3</sub>)

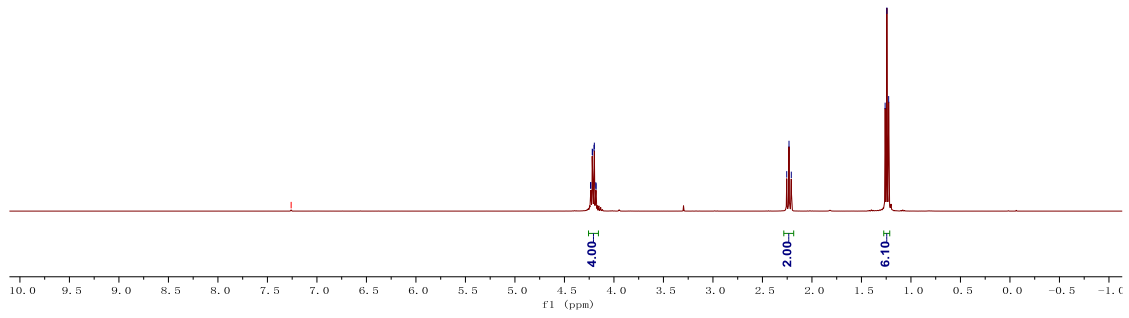

LHD-5177-3  
single\_pulse decoupled gated NOE

— 163.5

— 112.0  
— 109.1  
— 106.2

77.3 CDCl<sub>3</sub>  
77.0 CDCl<sub>3</sub>  
76.7 CDCl<sub>3</sub>

— 62.4

39.1  
38.9  
38.8

21.2  
21.1  
21.0  
— 13.7

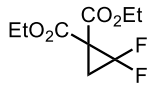

**1c**

<sup>13</sup>C NMR (101 MHz, CDCl<sub>3</sub>)

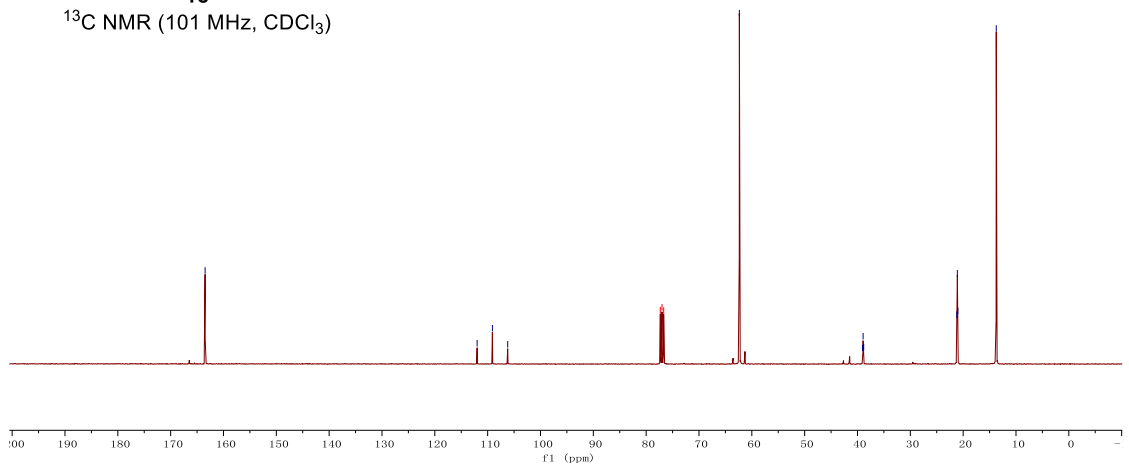

LHD-5177-3  
single\_pulse

-132.50  
-132.53  
-132.55

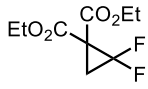

**1c**

<sup>19</sup>F NMR (376 MHz, CDCl<sub>3</sub>)

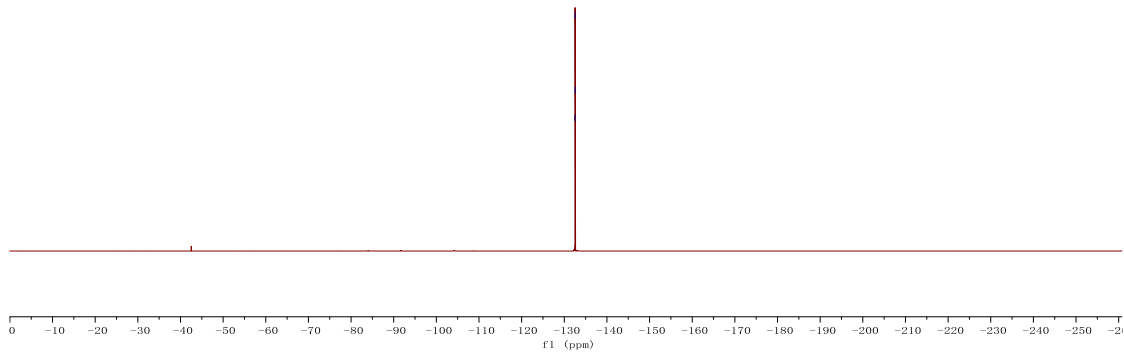

LHD-6021-1  
single\_pulse

7.83  
7.82  
7.81  
7.50  
7.50  
7.48  
7.45  
7.46  
7.25  
7.24

5.21  
5.17  
5.17  
5.13

2.70  
2.69  
2.68  
2.67  
2.66  
2.65  
2.64  
2.63  
2.62  
2.61

1.24  
1.23  
1.22  
1.21

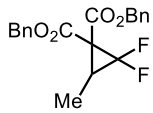

**1d**

<sup>1</sup>H NMR (400 MHz, CDCl<sub>3</sub>)

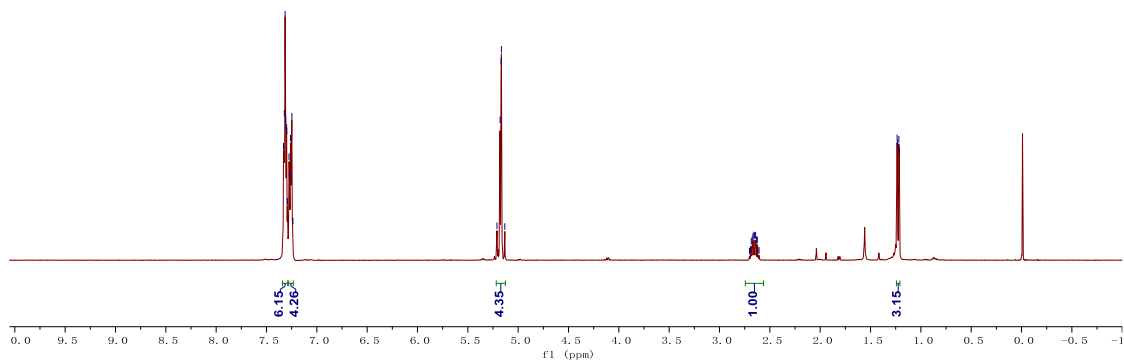

LHD-6021-1  
single pulse decoupled gated NOE

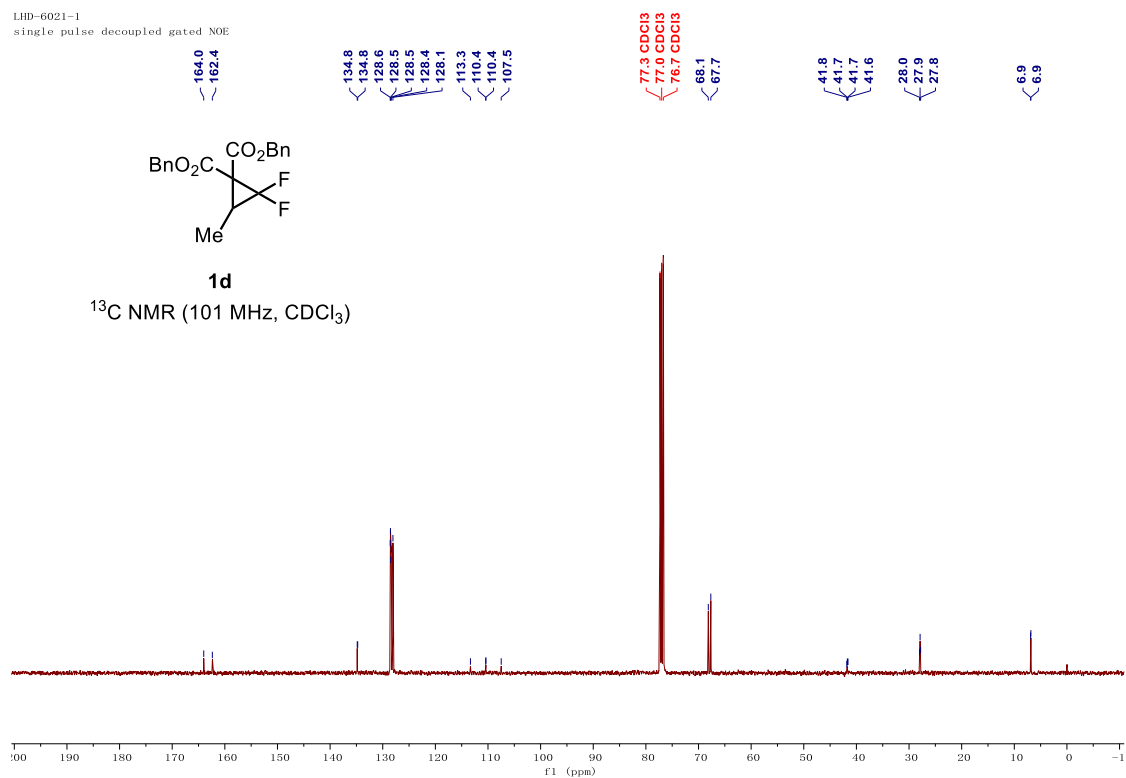

LHD-6021-1  
single\_pulse

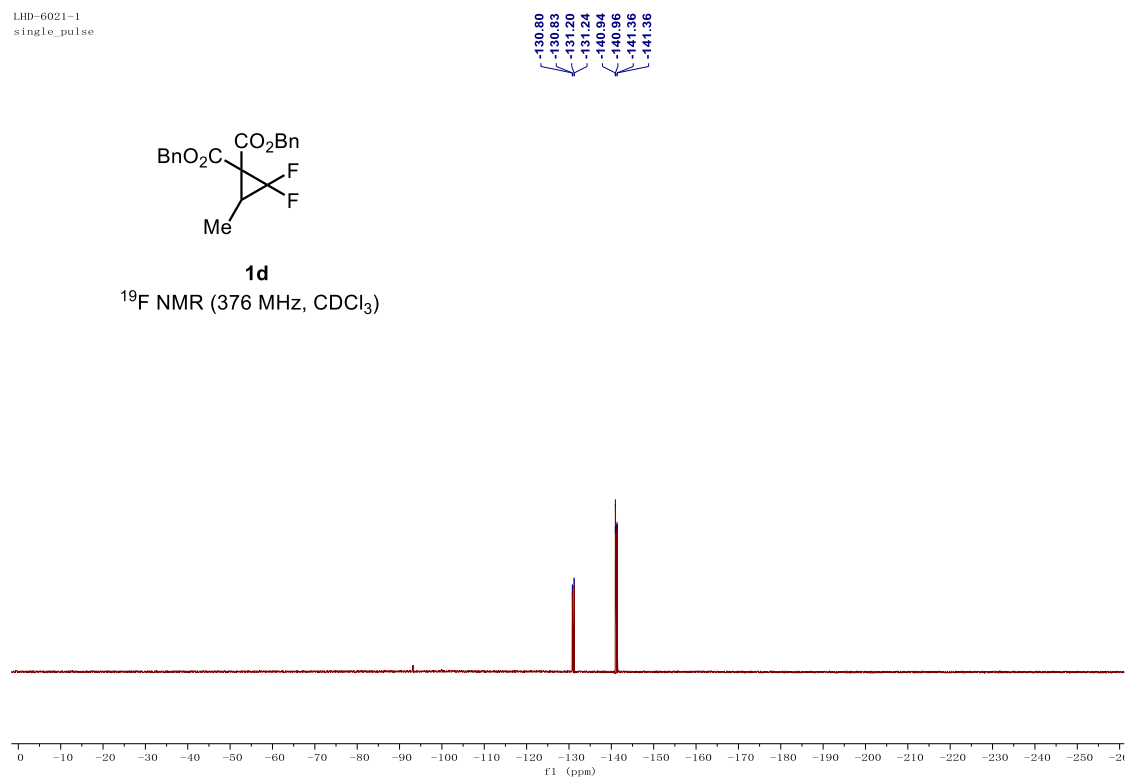

LHD-6099-7-3  
single\_pulse

7.33  
7.32  
7.31  
7.30  
7.27  
7.26

5.21  
5.19  
5.18  
5.15  
5.13  
5.12

2.60  
2.59  
2.56  
2.52

1.40  
1.23  
0.89  
0.87  
0.86

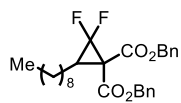

**1e**

<sup>1</sup>H NMR (400 MHz, CDCl<sub>3</sub>)

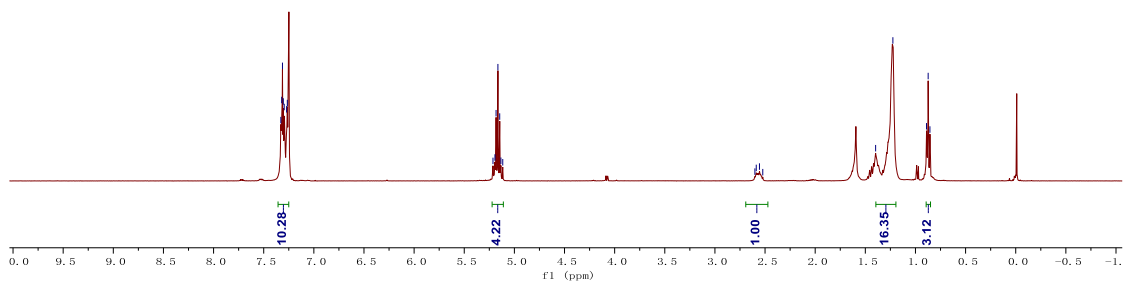

LHD-6099-7-3  
single\_pulse decoupled gated NOE

164.1  
162.5

134.8  
128.6  
128.5  
128.4  
128.0  
113.3  
110.4  
110.4  
107.5

77.3 CDCl3  
77.0 CDCl3  
76.7 CDCl3  
68.1  
67.6

41.9  
41.8  
41.8  
41.7  
33.0  
32.9  
28.4  
28.3  
28.2  
28.9  
28.1  
22.7  
22.3  
22.3  
14.1

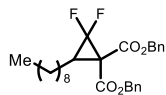

**1e**

<sup>13</sup>C NMR (101 MHz, CDCl<sub>3</sub>)

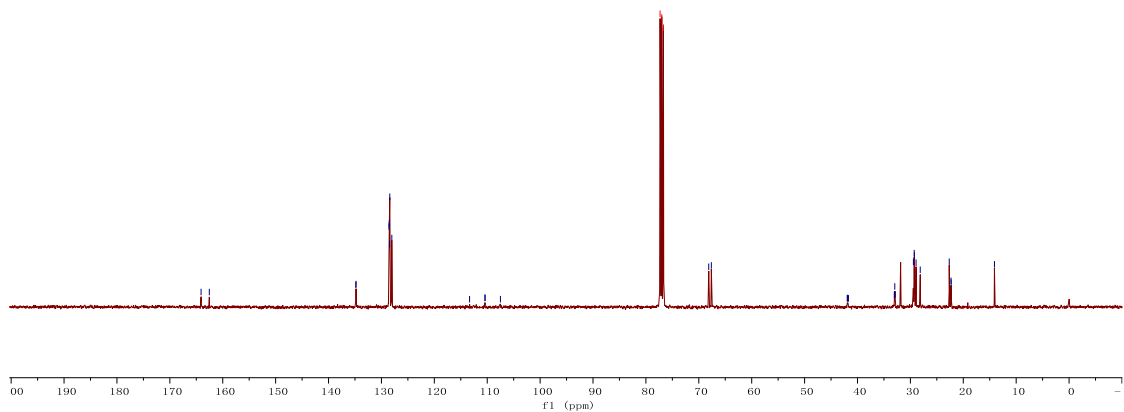

LHD-6099-7-3  
single\_pulse

-128.54  
-128.55  
-128.55  
-128.95  
-128.96  
-128.99  
-130.00  
-140.97  
-141.37  
-141.38

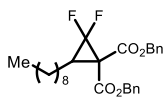

**1e**

<sup>19</sup>F NMR (376 MHz, CDCl<sub>3</sub>)

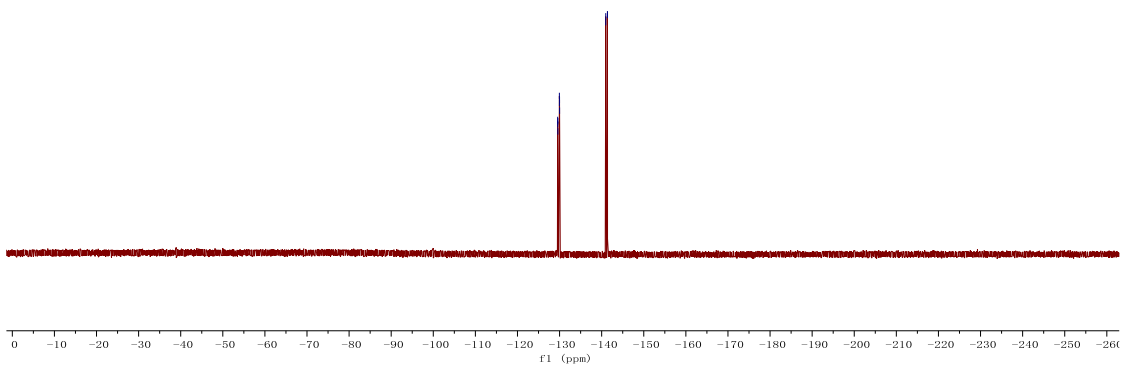

LHD-6073-3-4  
single\_pulse

7.33  
7.32  
7.32  
7.30  
7.29  
7.28  
7.26  
7.24  
7.23  
7.21  
7.19  
7.17  
7.10  
7.09  
5.21  
5.19  
5.17  
5.16  
5.14  
5.13  
2.75  
2.74  
2.71  
2.70  
2.68  
2.66  
2.64  
2.62  
2.61  
2.59  
2.58  
2.57  
2.56  
1.99  
1.97  
1.96  
1.94  
1.92  
1.90  
1.83  
1.81  
1.79  
1.77  
1.76  
1.74  
-0.00

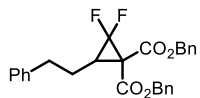

**1f**

<sup>1</sup>H NMR (400 MHz, CDCl<sub>3</sub>)

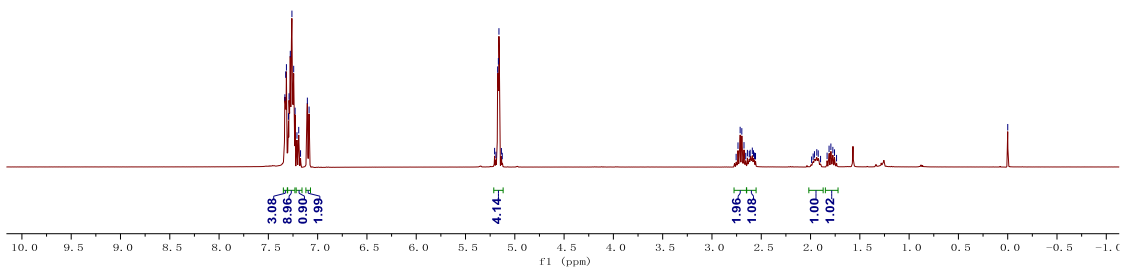

LHD-6073-3-2  
single pulse decoupled gated NOE

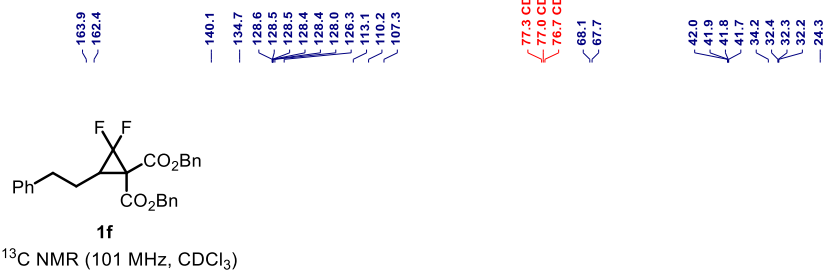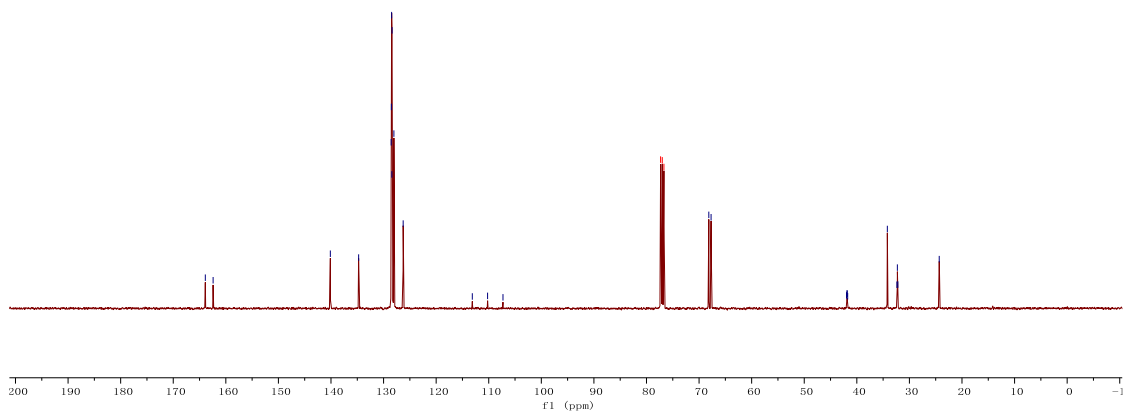

LHD-6071-3-5  
single\_pulse

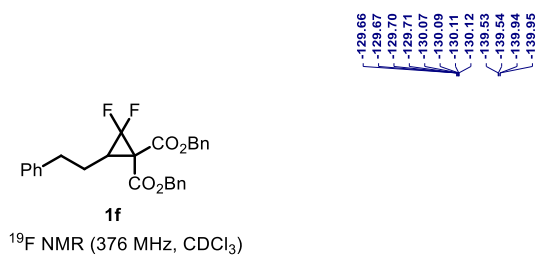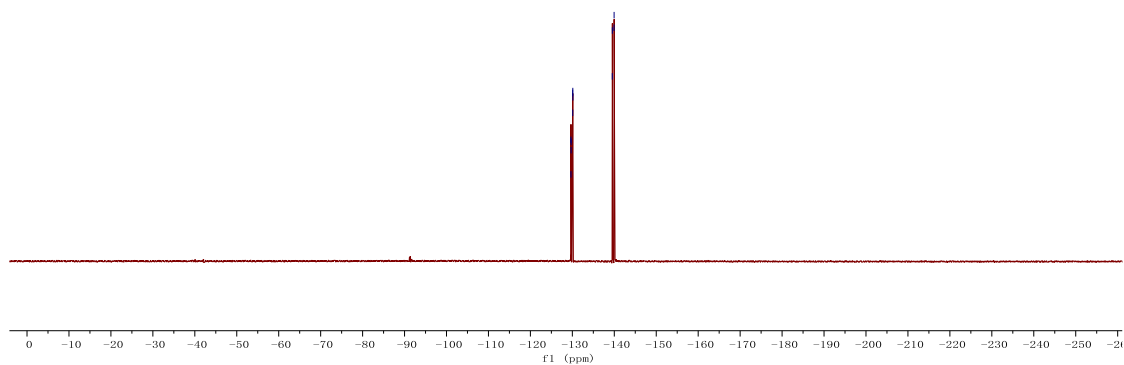

LHD-6071-3-6  
single\_pulse

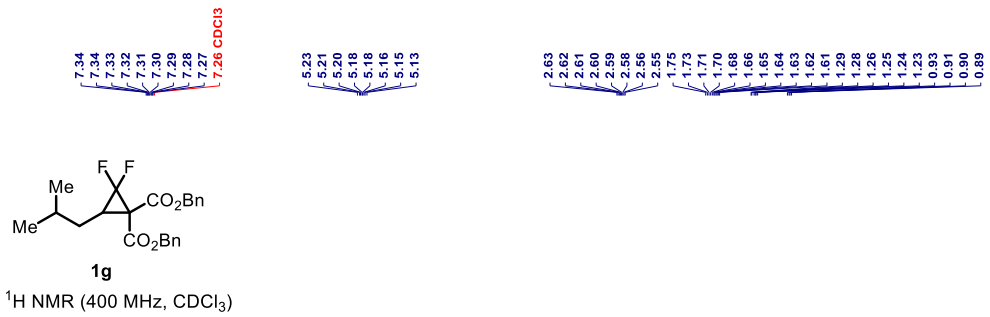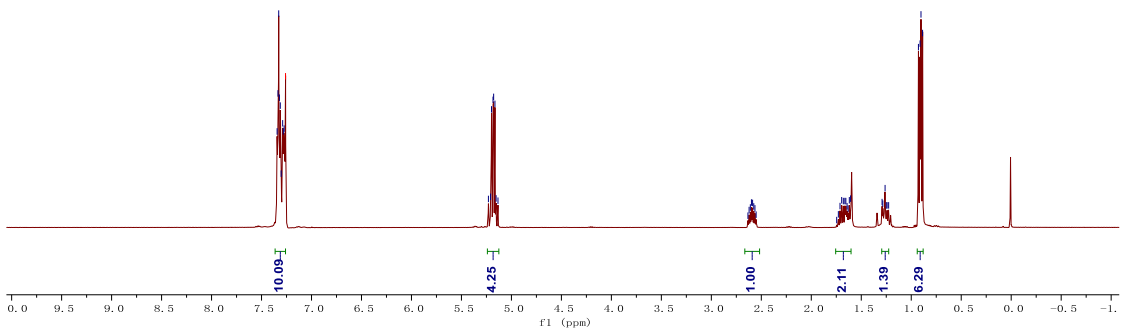

LHD-6071-3-4  
single\_pulse decoupled gated NOE

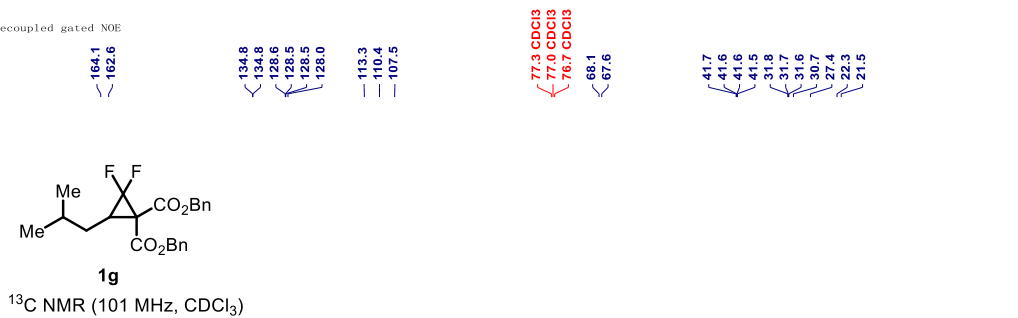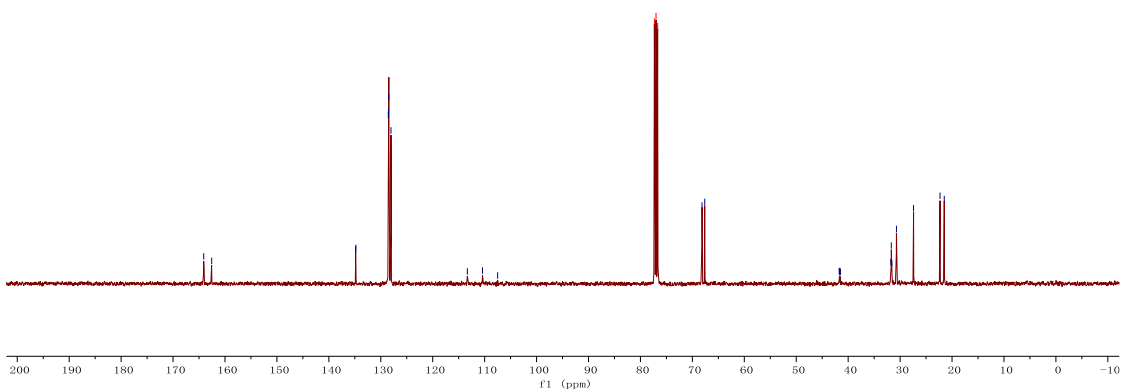



LHD-6071-3-5  
single\_pulse

-129.66  
-129.57  
-129.70  
-129.71  
-130.00  
-130.09  
-130.11  
-130.12  
-139.53  
-139.54  
-139.94  
-139.95

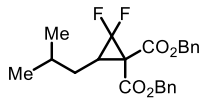

**1g**

<sup>19</sup>F NMR (376 MHz, CDCl<sub>3</sub>)

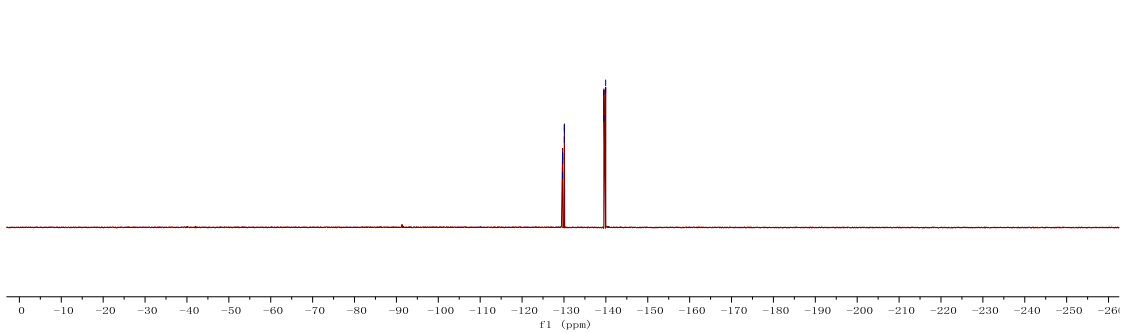

LHD-6085-1  
single\_pulse

7.33  
7.32  
7.32  
7.31  
7.30  
7.29  
7.26 CDCl3

-5.16

-1.50

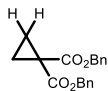

**1h**

<sup>1</sup>H NMR (400 MHz, CDCl<sub>3</sub>)

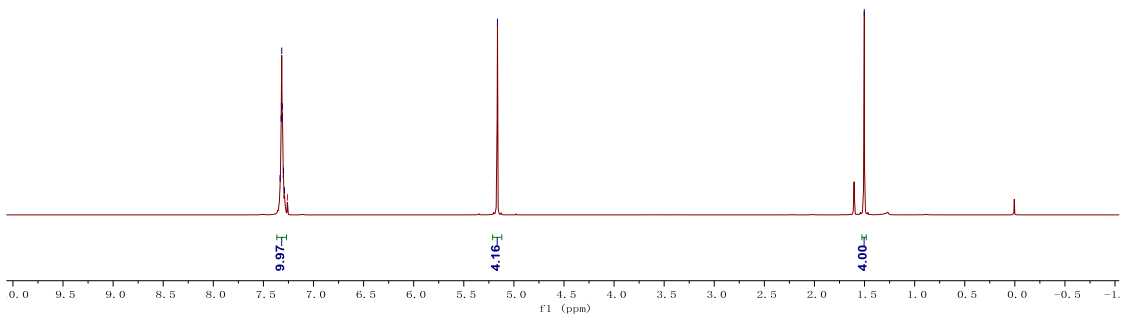

LHD-6085-1  
single pulse decoupled gated NOE

169.5

135.5

128.5

128.2

128.0

77.3 CDCl<sub>3</sub>

77.0 CDCl<sub>3</sub>

76.7 CDCl<sub>3</sub>

67.2

28.2

17.0

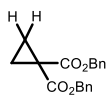

**1h**

<sup>13</sup>C NMR (101 MHz, CDCl<sub>3</sub>)

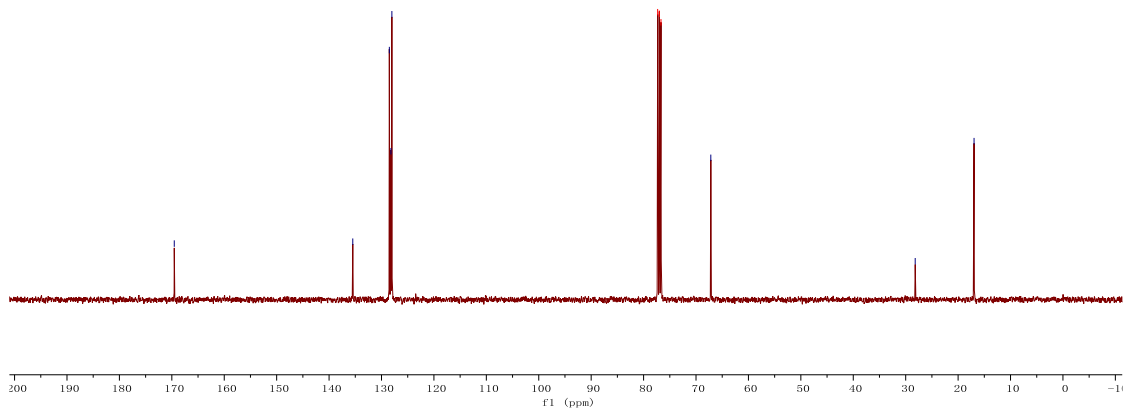

LHD-8114-2-2  
single\_pulse

7.26 CDCl<sub>3</sub>

2.19

1.50

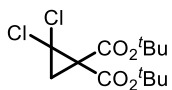

**S4**

<sup>1</sup>H NMR (400 MHz, CDCl<sub>3</sub>)

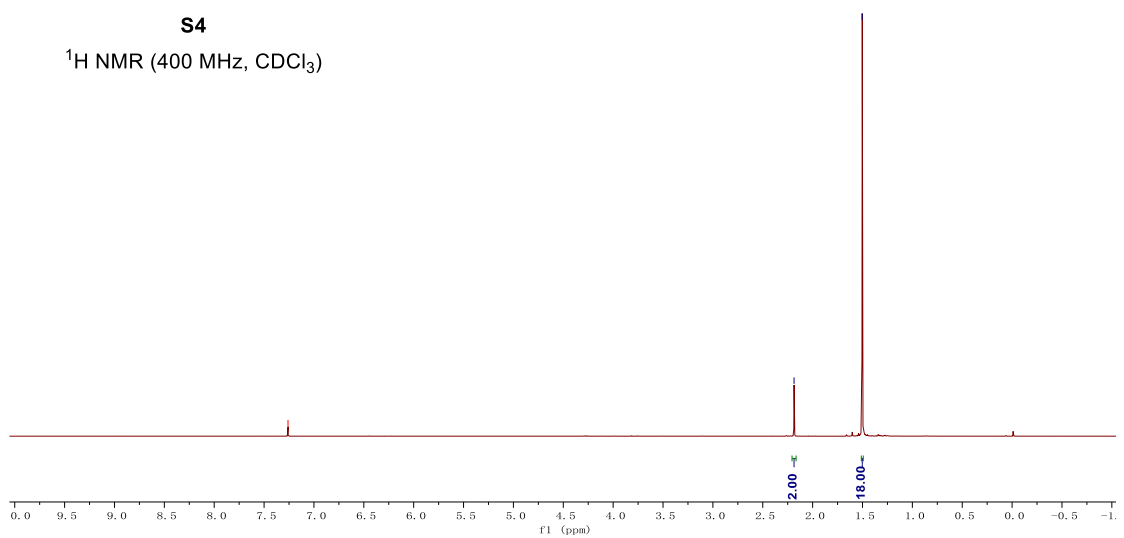

LHD-8114-2-2  
single pulse decoupled gated NOE

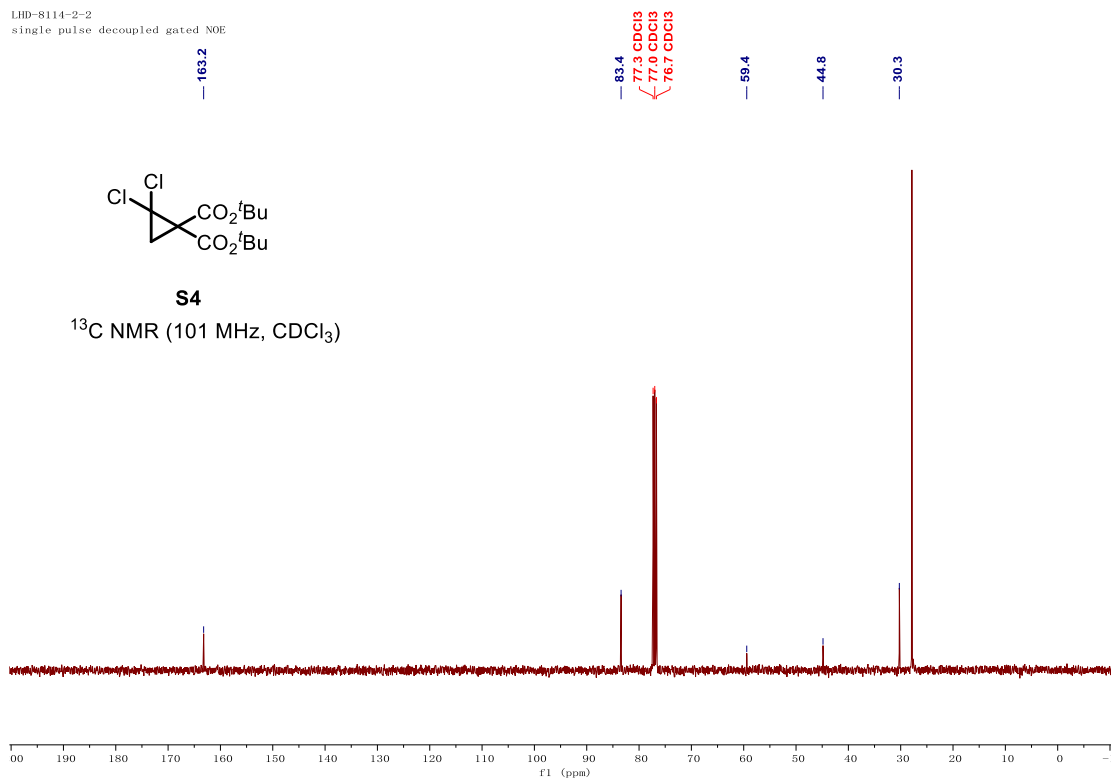

LHD-8117-2  
single\_pulse

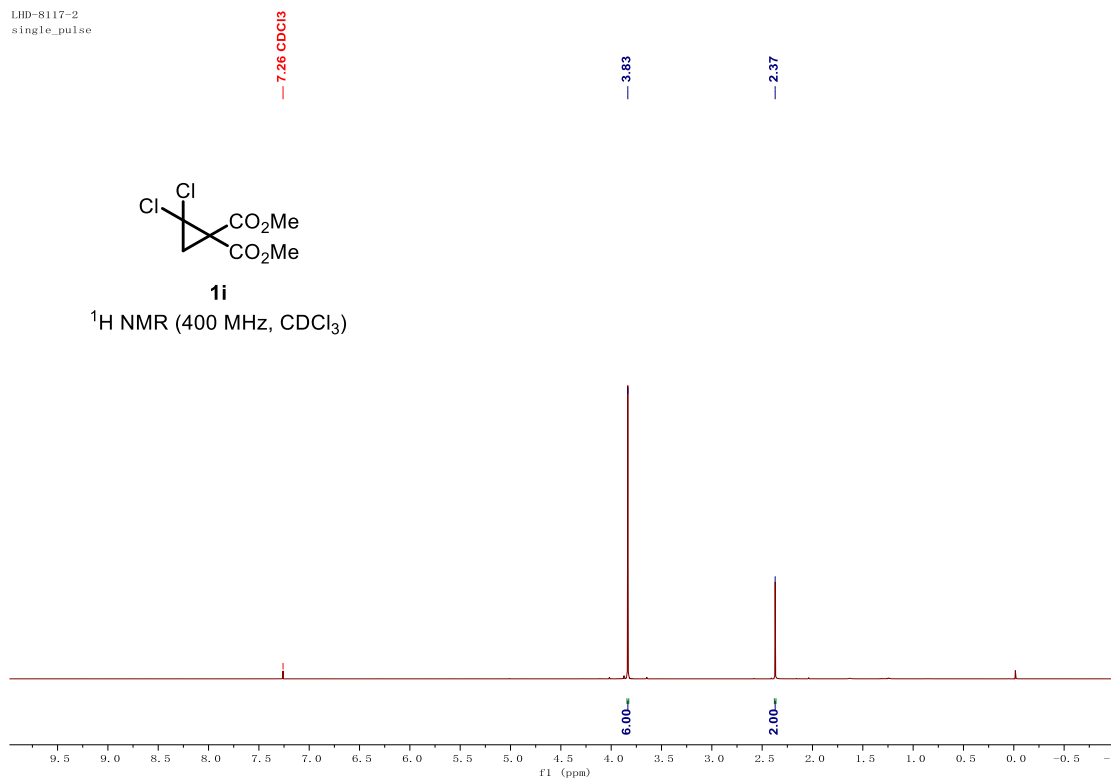

LHD-8117-2  
single pulse decoupled gated NOE

164.5

77.3 CDCl<sub>3</sub>  
77.0 CDCl<sub>3</sub>  
76.7 CDCl<sub>3</sub>

59.4

53.6

43.6

30.9

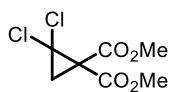

**1i**

<sup>13</sup>C NMR (101 MHz, CDCl<sub>3</sub>)

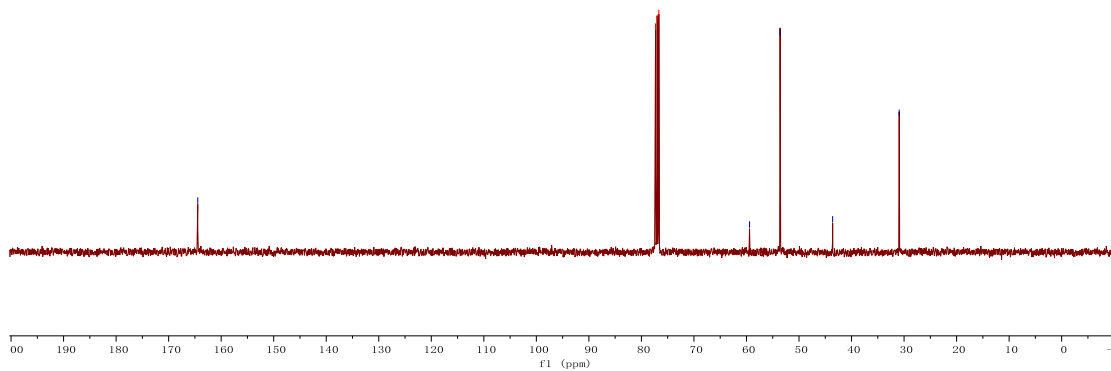

LHD-7059  
single\_pulse

3.80

2.45

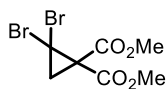

**1j**

<sup>1</sup>H NMR (400 MHz, CDCl<sub>3</sub>)

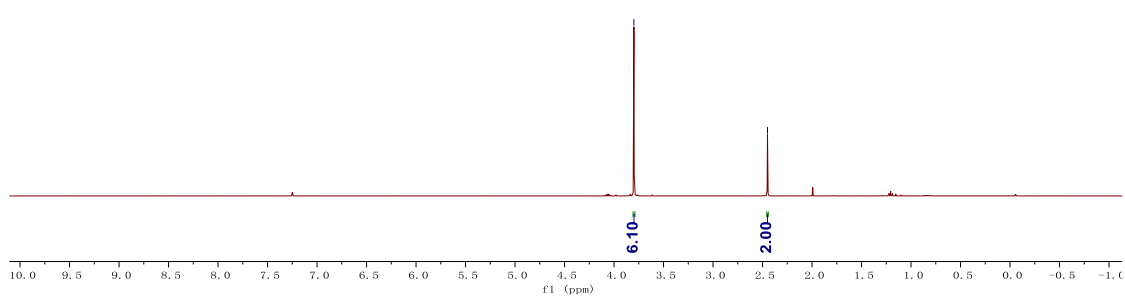

LHD-7059  
single pulse decoupled gated NOE

164.7

77.3 CDCl<sub>3</sub>  
77.0 CDCl<sub>3</sub>  
76.7 CDCl<sub>3</sub>

53.5

42.9

32.7

22.2

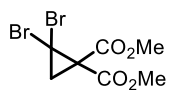

**1j**

<sup>13</sup>C NMR (101 MHz, CDCl<sub>3</sub>)

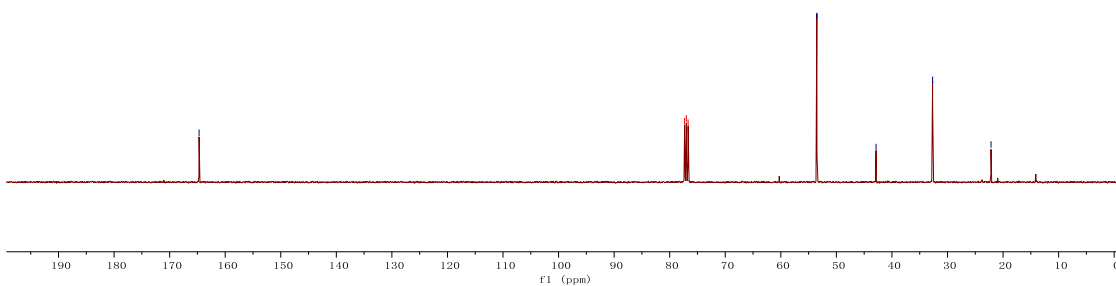

LHD-7162-1  
single\_pulse

7.35  
7.34  
7.34  
7.32  
7.29  
7.26 CDCl<sub>3</sub>

5.28  
5.25  
5.22  
5.21  
5.20  
5.20  
5.19  
5.18  
5.13  
5.10  
5.05  
5.04  
5.04  
5.03

2.29  
2.28  
2.27  
2.26  
2.23  
2.22  
2.22  
2.20  
1.68  
1.66  
1.64  
1.63  
1.61

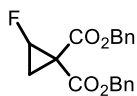

**1k**

<sup>1</sup>H NMR (400 MHz, CDCl<sub>3</sub>)

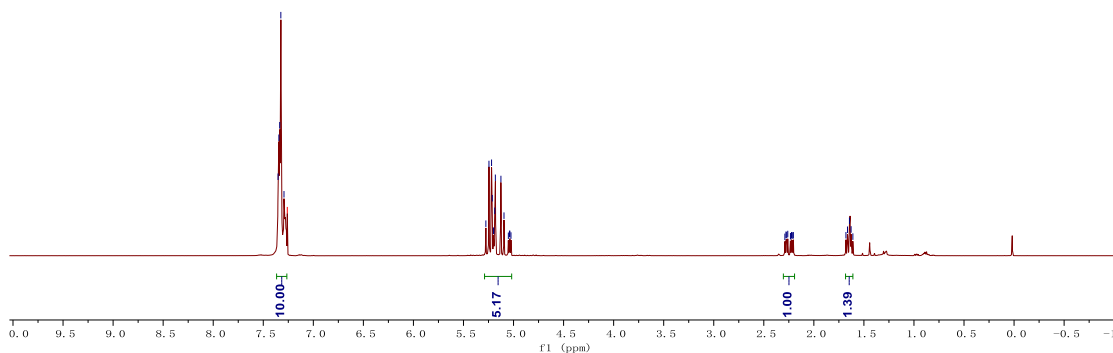

LHD-7162-1  
single pulse decoupled gated NOE

167.6  
164.4  
164.3

135.1  
134.9  
128.6  
128.5  
128.4  
128.3  
128.1  
128.1

77.3 CDCl<sub>3</sub>  
77.0 CDCl<sub>3</sub>  
76.7 CDCl<sub>3</sub>  
74.0  
67.9  
67.5

34.4  
34.3

20.4  
20.3

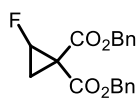

**1k**

<sup>13</sup>C NMR (101 MHz, CDCl<sub>3</sub>)

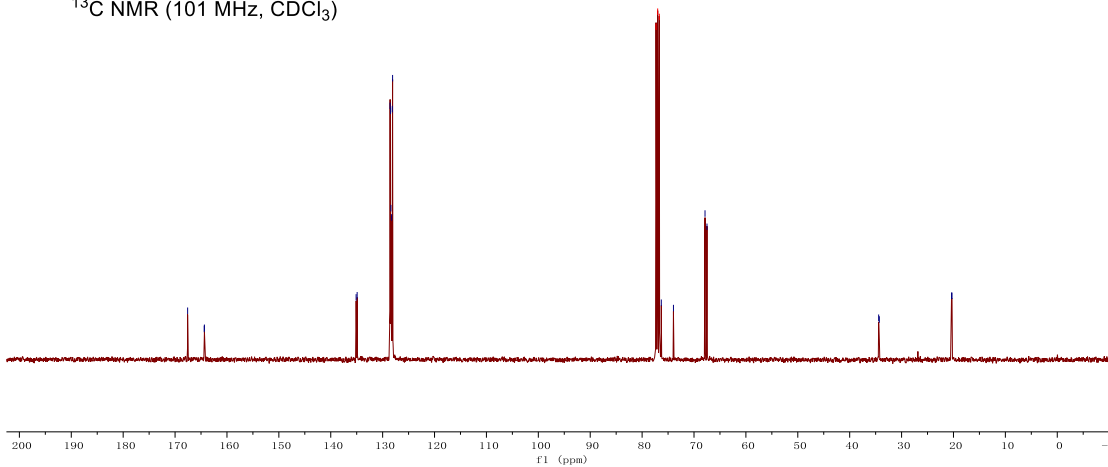

LHD-8117-3  
single\_pulse

211.46  
211.50  
211.52  
211.56  
211.63  
211.67  
211.69  
211.73

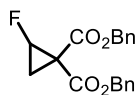

**1k**

<sup>19</sup>F NMR (376 MHz, CDCl<sub>3</sub>)

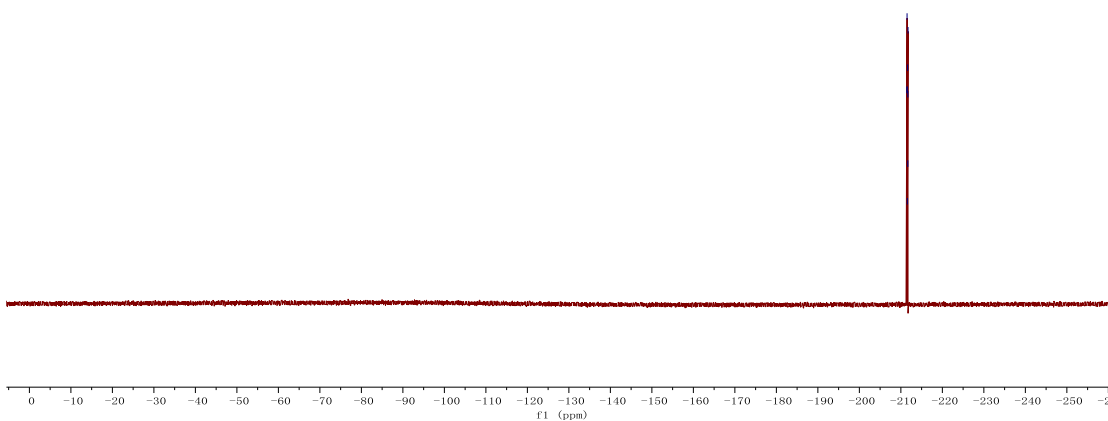

LHD-6083-3-6  
single\_pulse

7.33  
7.30  
7.29  
7.27  
7.24  
7.22  
7.20  
6.99  
6.97  
5.31  
5.28  
5.23  
5.20  
4.95  
4.92  
4.90  
4.87  
3.90  
3.89  
3.86  
3.85

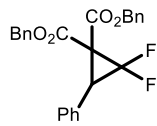

11

$^1\text{H}$  NMR (400 MHz,  $\text{CDCl}_3$ )

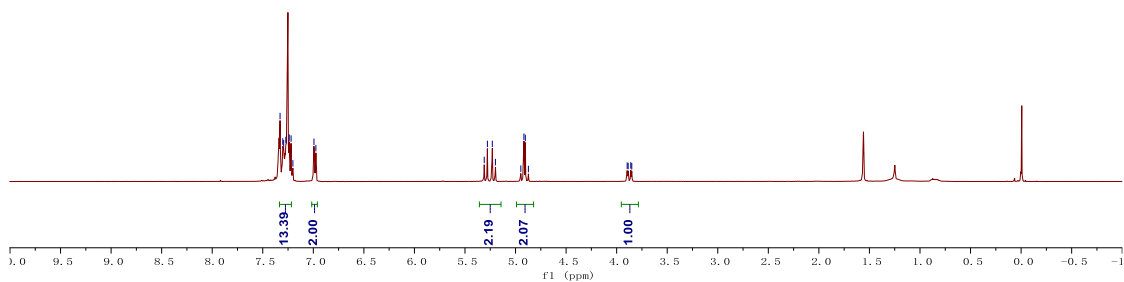

LHD-6083-3-6  
single\_pulse decoupled gated NOE

163.6  
161.7  
134.7  
134.5  
129.2  
128.6  
128.5  
128.4  
128.3  
128.1  
112.4  
109.5  
109.3  
106.6  
77.3  $\text{CDCl}_3$   
77.0  $\text{CDCl}_3$   
76.7  $\text{CDCl}_3$   
68.5  
67.6  
44.7  
44.6  
44.6  
44.5  
36.3  
36.2  
36.1  
36.0

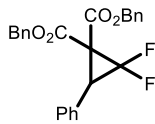

11

$^{13}\text{C}$  NMR (101 MHz,  $\text{CDCl}_3$ )

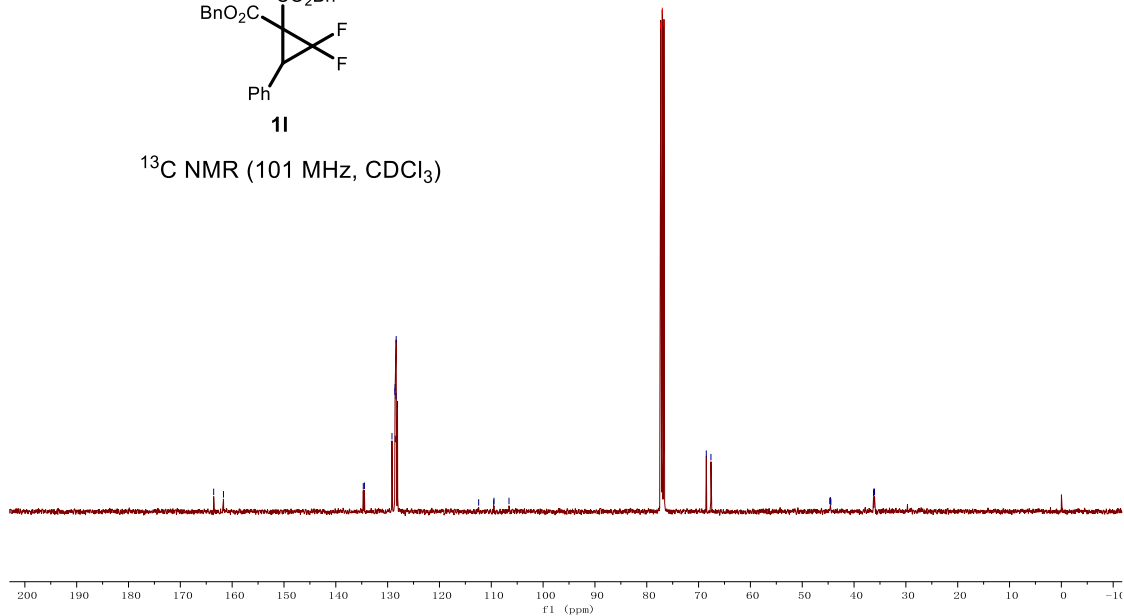

LHD-6083-3-6  
single\_pulse

-124.56  
-124.59  
-124.98  
-125.01  
-138.20  
-138.21  
-138.62  
-138.63

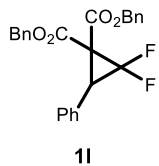

<sup>19</sup>F NMR (376 MHz, CDCl<sub>3</sub>)

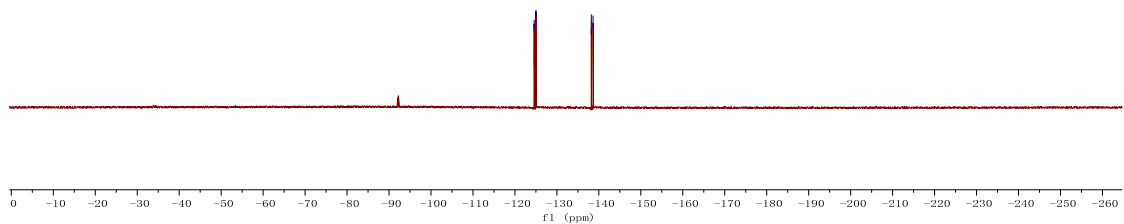

LHD-5181-4-2  
single\_pulse

7.31  
7.30  
7.29  
7.29  
7.28  
7.26  
7.25  
7.24  
7.22  
7.22  
7.19  
7.06  
7.04  
6.92  
6.91  
6.12  
6.11

5.18  
4.72  
4.69  
4.45  
4.42  
3.48  
3.47  
3.45  
3.44  
3.43  
3.42  
3.41  
3.39  
2.89  
2.88  
2.93  
2.92  
2.91  
2.91  
2.89  
2.89  
2.30

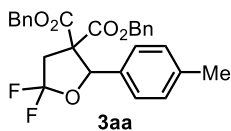

<sup>1</sup>H NMR (400 MHz, CDCl<sub>3</sub>)

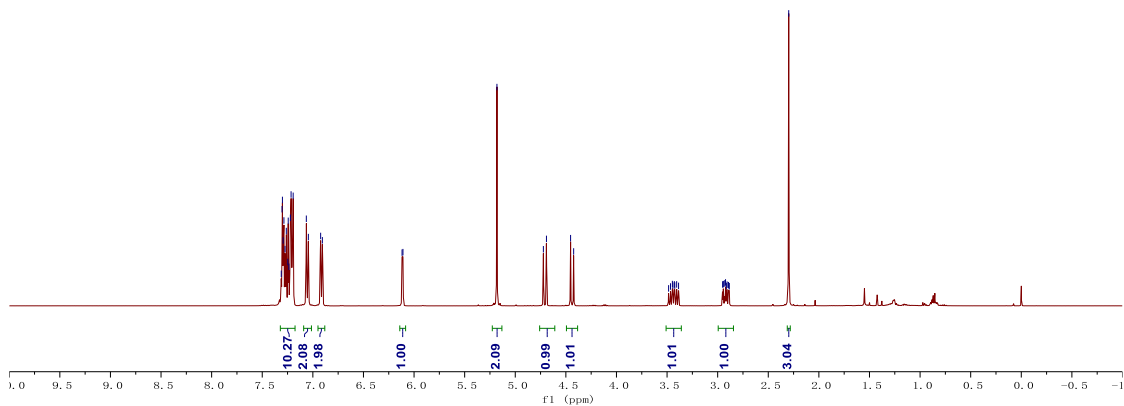



LHD-5181-4-2  
single pulse decoupled gated NOE

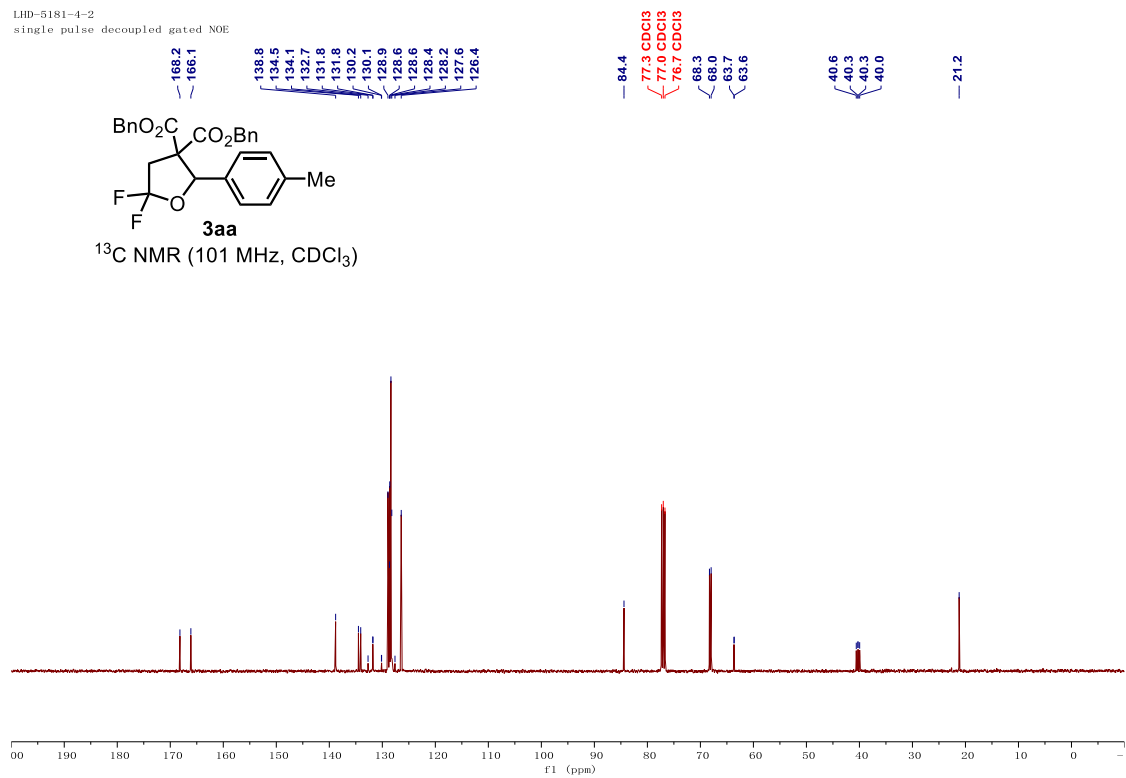

LHD-5181-4-2  
single\_pulse

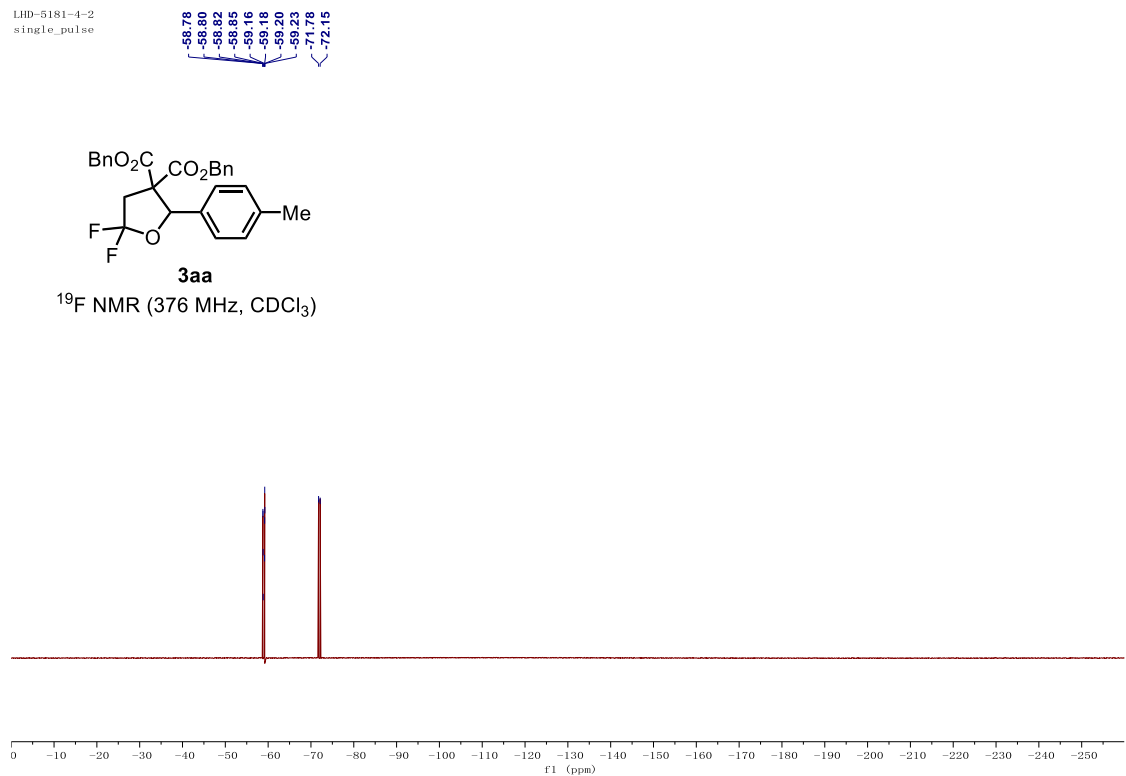

LHD-5193-4-1  
single pulse

7.274, 7.276, 7.306, 7.300, 7.299, 7.288, 7.288, 7.277, 7.266, 7.264, 7.224, 7.222, 7.221, 7.220, 7.200, 6.844, 6.822, 6.822, 6.775, 6.669, 6.662, 5.20, 4.64, 4.61, 4.19, 4.16, 3.69, 3.68, 3.66, 3.64, 3.63, 3.62, 3.59, 3.56, 2.95, 2.93, 2.93, 2.91, 2.90, 2.89, 2.33, 2.20, 0.00

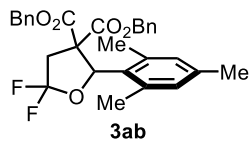

<sup>1</sup>H NMR (400 MHz, CDCl<sub>3</sub>)

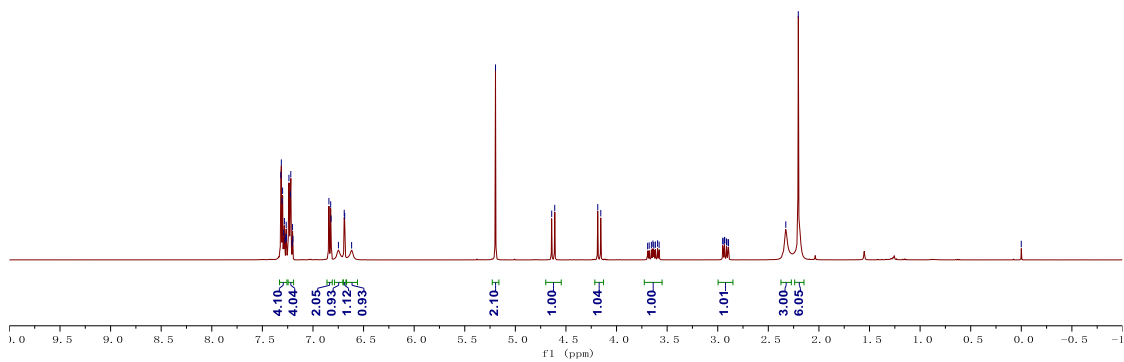

LHD-5193-4-2  
single pulse decoupled gated NOE

169.0, 166.5, 138.1, 134.6, 133.9, 132.0, 131.4, 129.5, 129.4, 129.4, 128.7, 128.6, 128.4, 128.4, 128.3, 128.0, 126.9, 81.7, 77.5 CDCl<sub>3</sub>, 77.0 CDCl<sub>3</sub>, 76.7 CDCl<sub>3</sub>, 68.4, 68.1, 62.6, 62.5, 41.8, 41.5, 41.4, 41.1, 21.2, 20.8

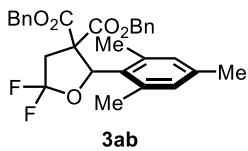

<sup>13</sup>C NMR (101 MHz, CDCl<sub>3</sub>)

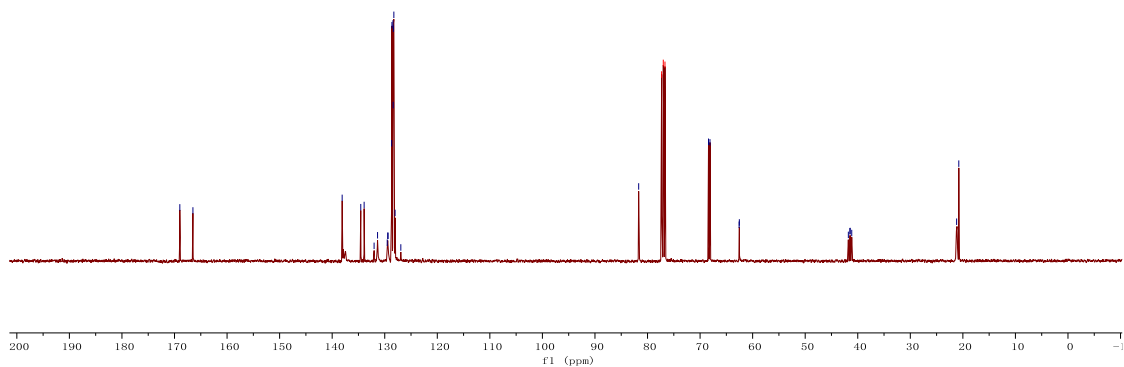

LHD-5193-4  
single\_pulse

56.11  
56.12  
56.17  
56.19  
56.49  
56.56  
56.57  
80.08  
80.09  
80.47  
80.48

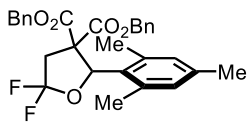

**3ab**

<sup>19</sup>F NMR (376 MHz, CDCl<sub>3</sub>)

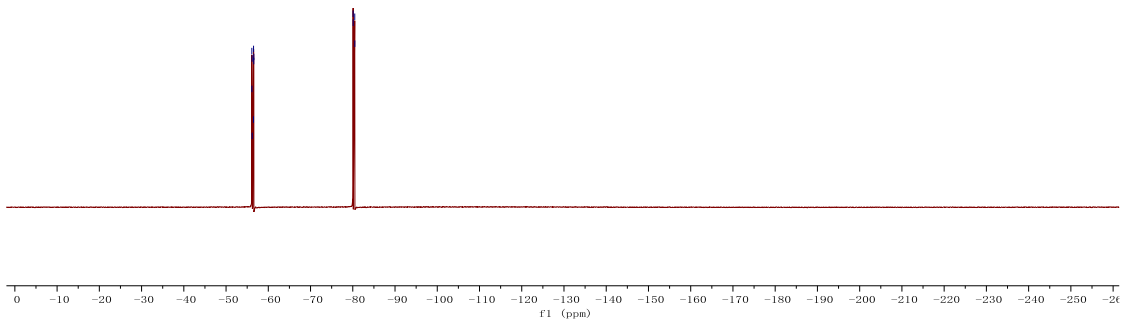

LHD-6033-3  
single\_pulse

7.84  
7.75  
7.73  
7.72  
7.62  
7.51  
7.50  
7.49  
7.45  
7.44  
7.43  
7.33  
7.32  
7.26 CDCl<sub>3</sub>  
7.25  
7.25  
7.23  
7.23  
7.19  
7.09  
7.07  
6.85  
6.85  
6.64  
6.33  
6.32  
5.23  
4.60  
4.57  
4.28  
4.25  
3.59  
3.57  
3.56  
3.55  
3.54  
3.53  
3.52  
3.50  
3.03  
3.03  
3.01  
3.00  
3.00  
2.99  
2.97  
2.97

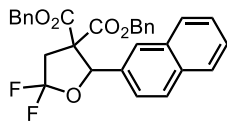

**3ac**

<sup>1</sup>H NMR (400 MHz, CDCl<sub>3</sub>)

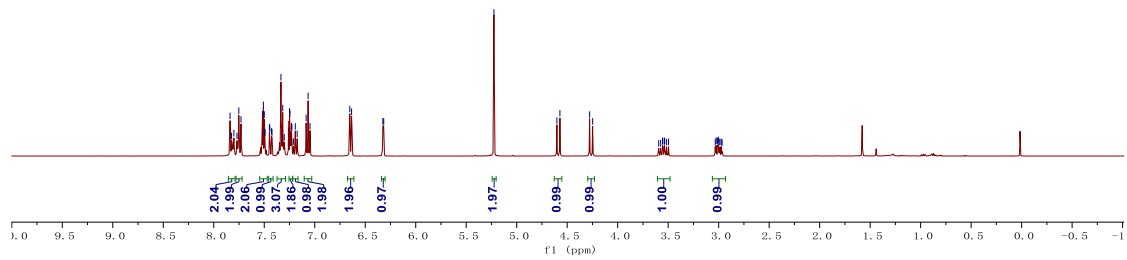

LHD-6033-3  
single pulse decoupled gated NOE

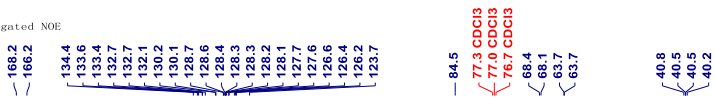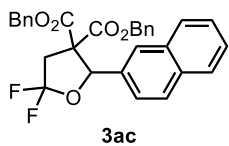

<sup>13</sup>C NMR (101 MHz, CDCl<sub>3</sub>)

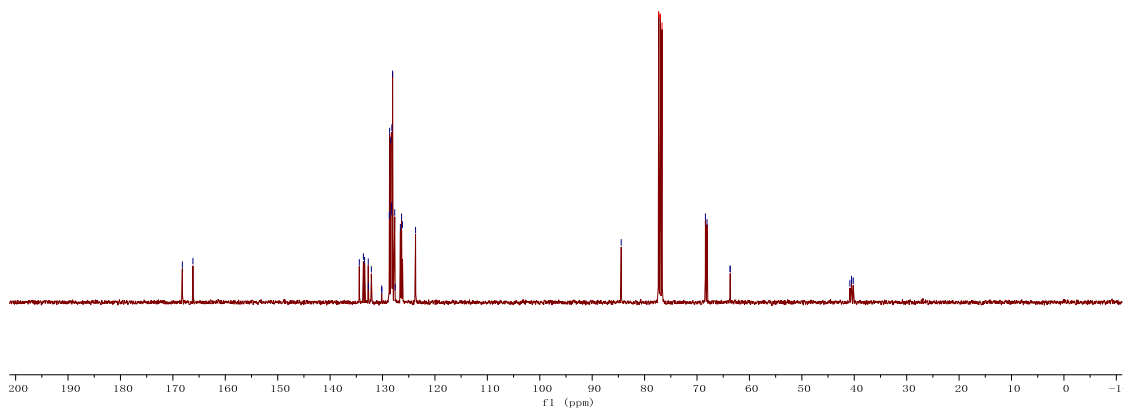

LHD-6033-3  
single\_pulse

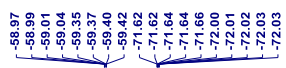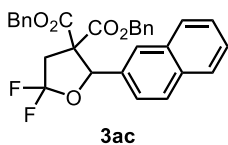

<sup>19</sup>F NMR (376 MHz, CDCl<sub>3</sub>)

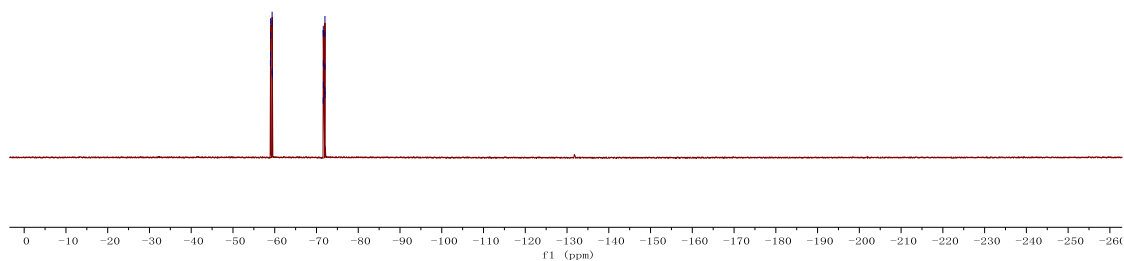

LHD-6005  
single

7.336  
7.314  
7.31  
7.30  
7.28  
7.27  
7.26  
7.25  
7.23  
7.23  
7.21  
6.95  
6.94  
6.93  
6.92  
6.92  
6.91  
6.89  
6.88  
6.87  
6.77  
6.76  
6.75  
6.75  
6.10  
6.09

5.19  
5.19  
4.74  
4.71  
4.49  
4.46  
3.77  
3.49  
3.47  
3.45  
3.44  
3.43  
3.43  
3.41  
3.39  
2.95  
2.94  
2.93  
2.92  
2.91  
2.90  
2.89  
2.88

0.00

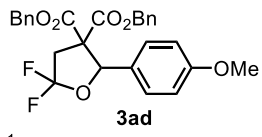

<sup>1</sup>H NMR (400 MHz, CDCl<sub>3</sub>)

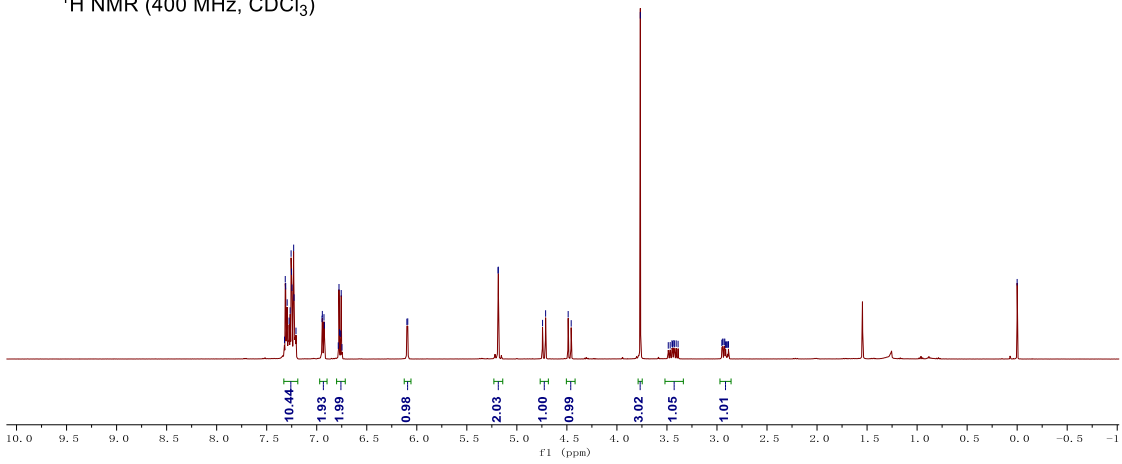

LHD-6005-2-2  
single pulse decoupled gated NOE

168.2  
166.2  
160.0

134.5  
134.1  
132.6  
130.1  
130.0  
128.7  
128.6  
128.4  
128.2  
127.9  
126.5  
126.6  
113.6

84.3  
77.3 CDCl<sub>3</sub>  
77.0 CDCl<sub>3</sub>  
76.7 CDCl<sub>3</sub>  
68.3  
63.6  
63.6  
55.2

40.7  
40.4  
40.3  
40.0

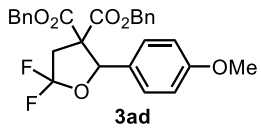

<sup>13</sup>C NMR (101 MHz, CDCl<sub>3</sub>)

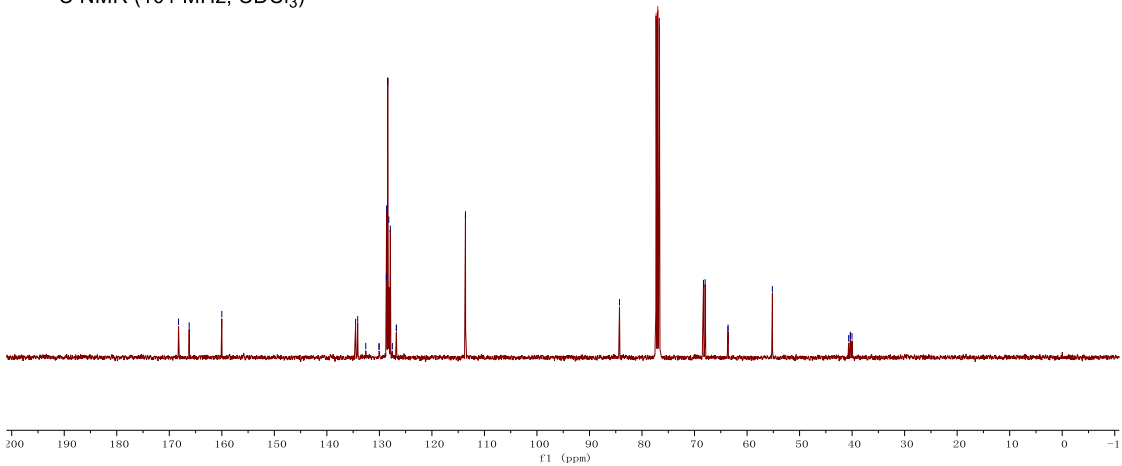

LHD-6005-2  
single\_pulse

58.97  
58.99  
58.01  
58.03  
59.35  
59.30  
59.42  
-71.69  
-71.70  
-71.71  
-71.72  
-72.08  
-72.09  
-72.10

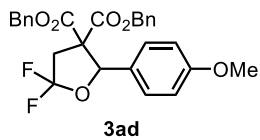

<sup>19</sup>F NMR (376 MHz, CDCl<sub>3</sub>)

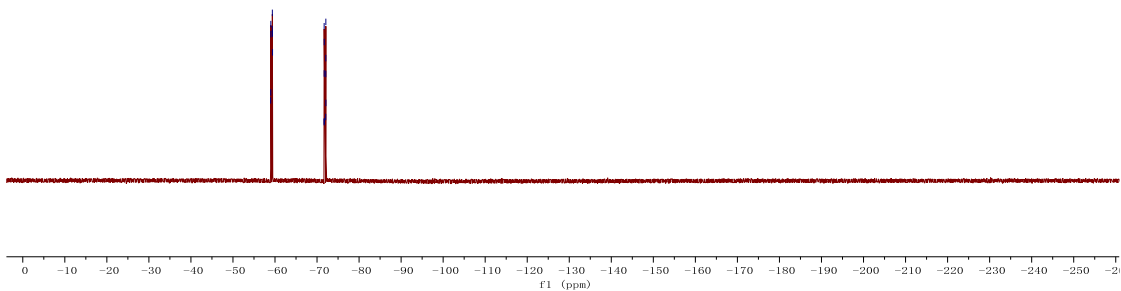

LHD-6027-7  
single\_pulse

7.33  
7.32  
7.31  
7.29  
7.28  
7.26  
7.24  
7.21  
6.93  
6.91  
6.89  
6.87  
6.09  
6.09  
5.19  
4.71  
4.68  
4.51  
4.48  
3.48  
3.46  
3.44  
3.44  
3.42  
3.42  
3.40  
3.38  
2.96  
2.95  
2.94  
2.93  
2.92  
2.92  
2.90  
2.89  
-0.00

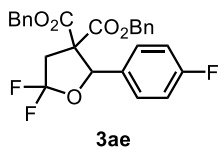

<sup>1</sup>H NMR (400 MHz, CDCl<sub>3</sub>)

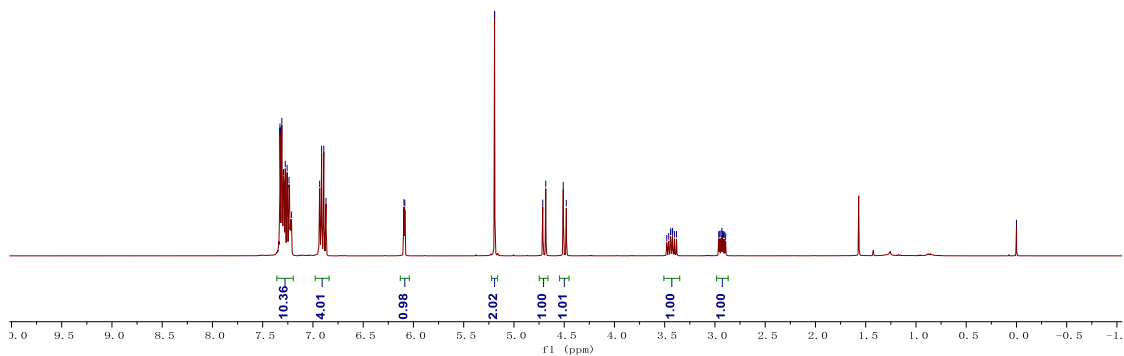

LHD-6027-7  
single pulse decoupled gated NOE

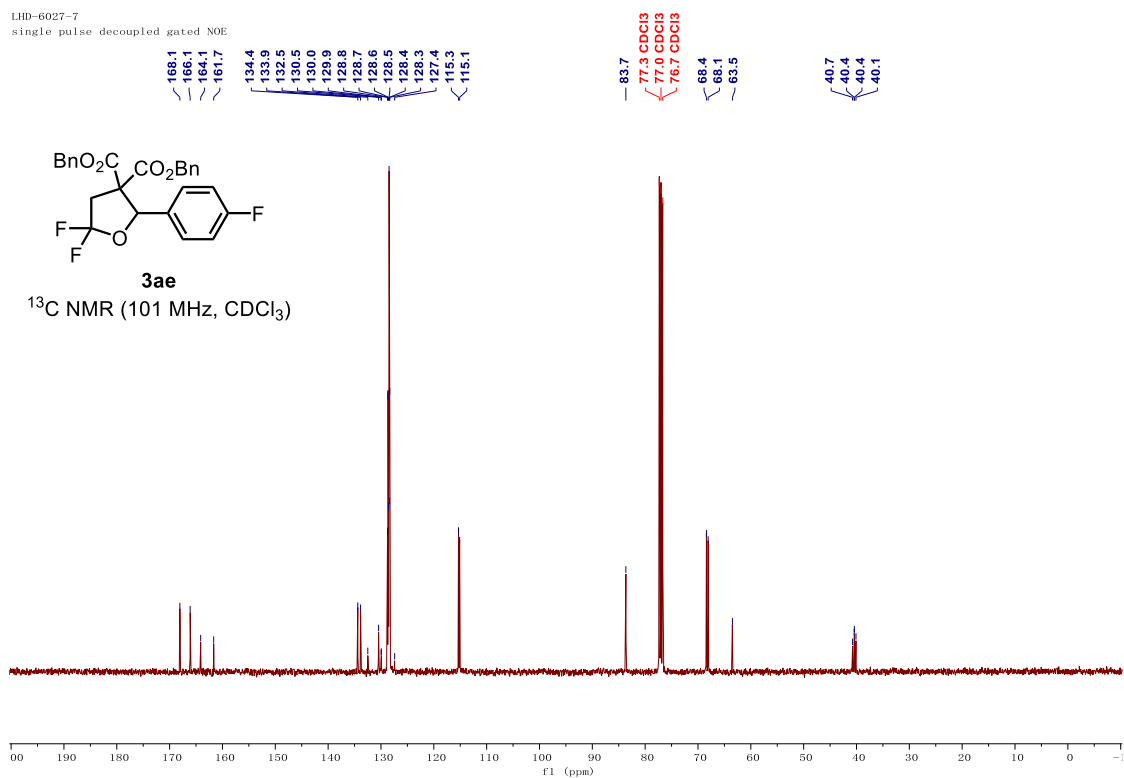

LHD-6027-7  
single\_pulse

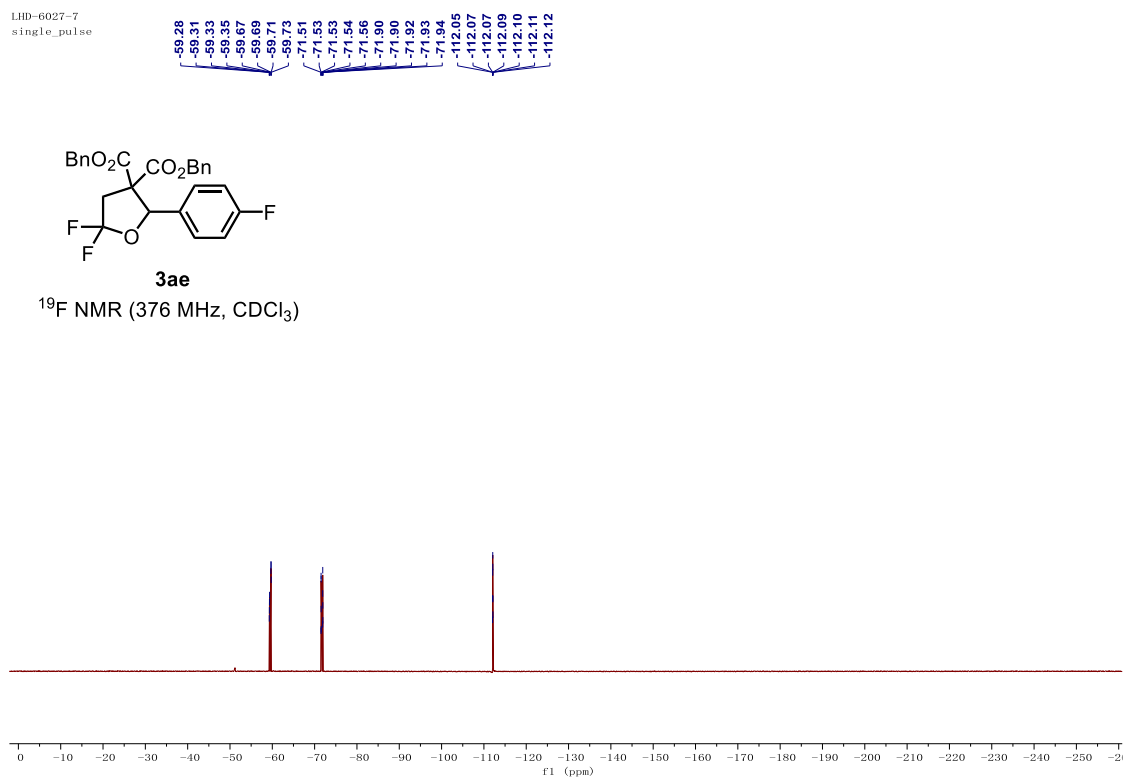

LHD-5193-3-2  
single\_pulse

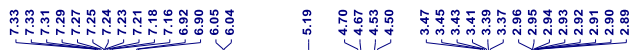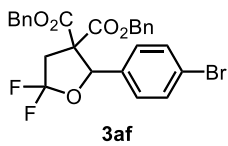

<sup>1</sup>H NMR (400 MHz, CDCl<sub>3</sub>)

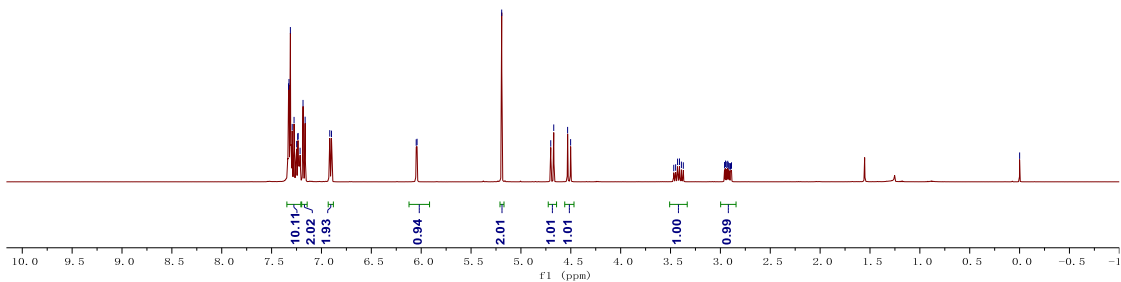

LHD-5193-3  
single pulse decoupled gated NOE

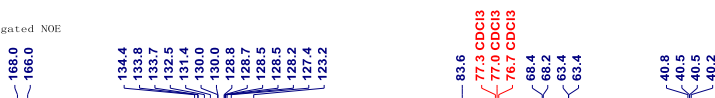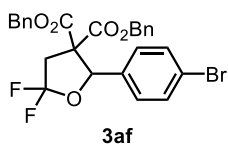

<sup>13</sup>C NMR (101 MHz, CDCl<sub>3</sub>)

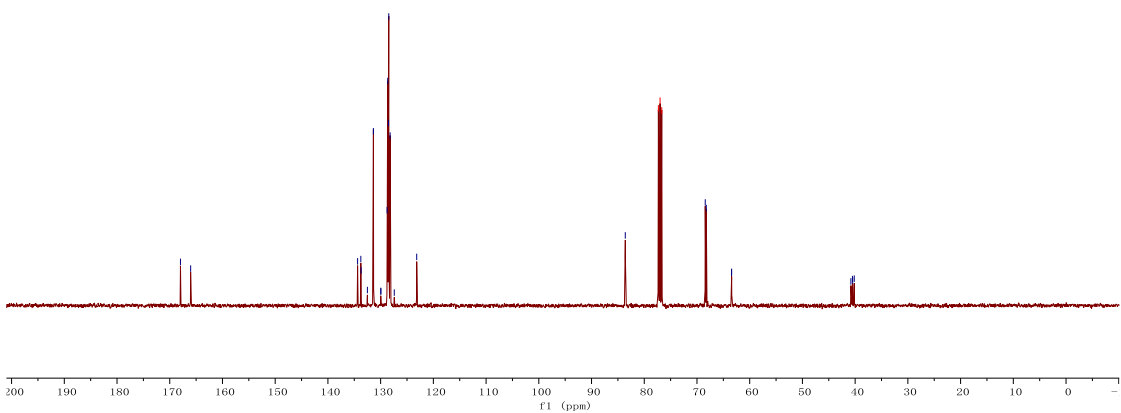



LHD-5193-3-2  
single\_pulse

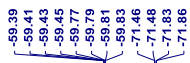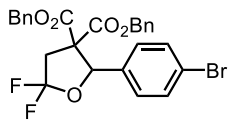

<sup>19</sup>F NMR (376 MHz, CDCl<sub>3</sub>)

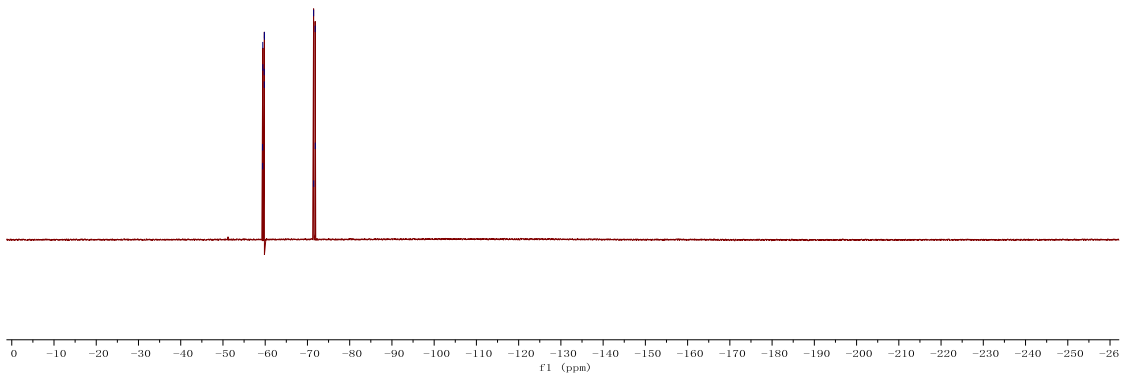

LHD-6027-6  
single\_pulse

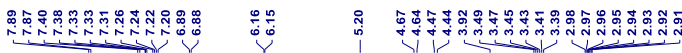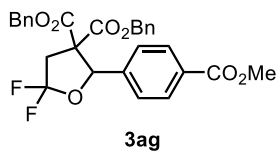

<sup>1</sup>H NMR (400 MHz, CDCl<sub>3</sub>)

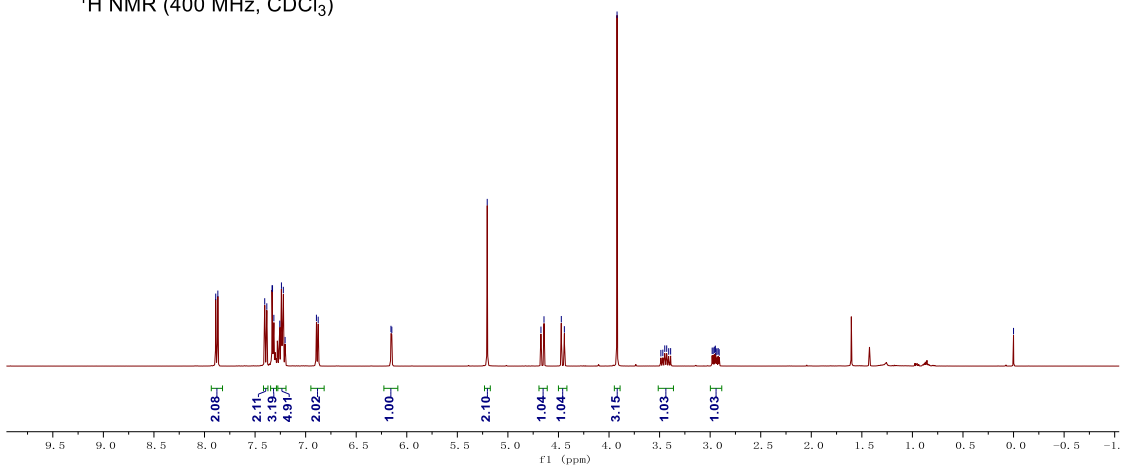

LHD-6027-6  
single pulse decoupled gated NOE

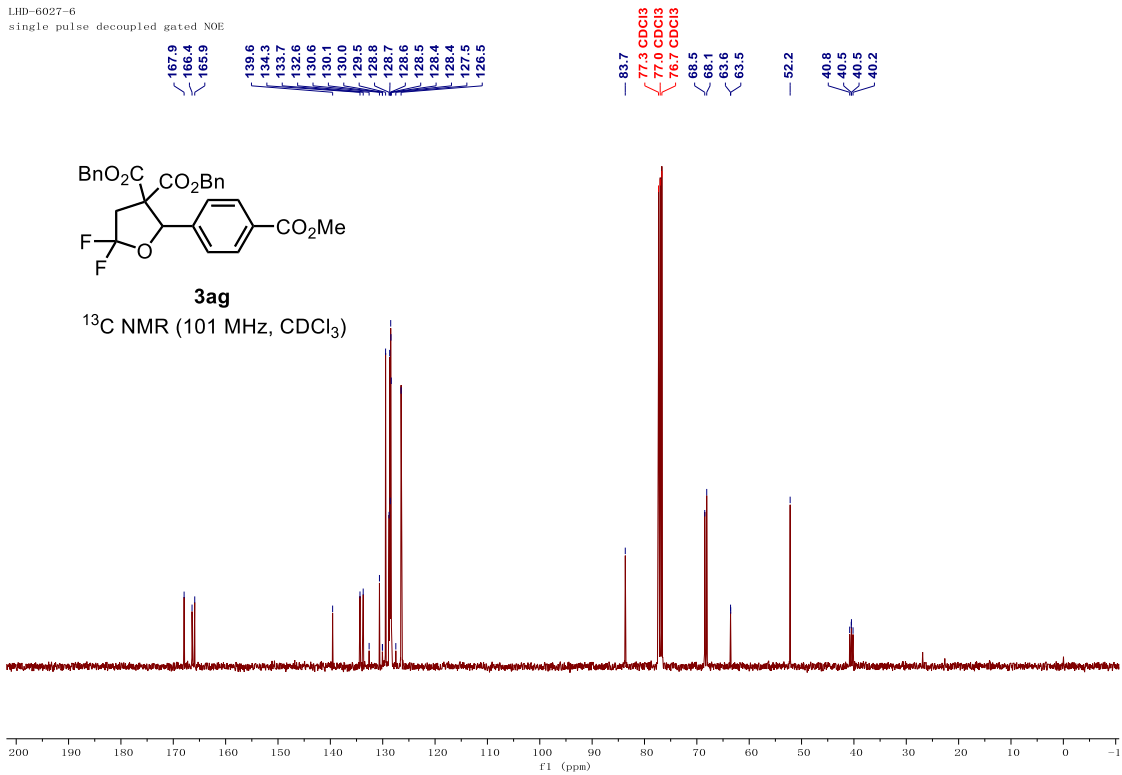

LHD-6027-6  
single\_pulse

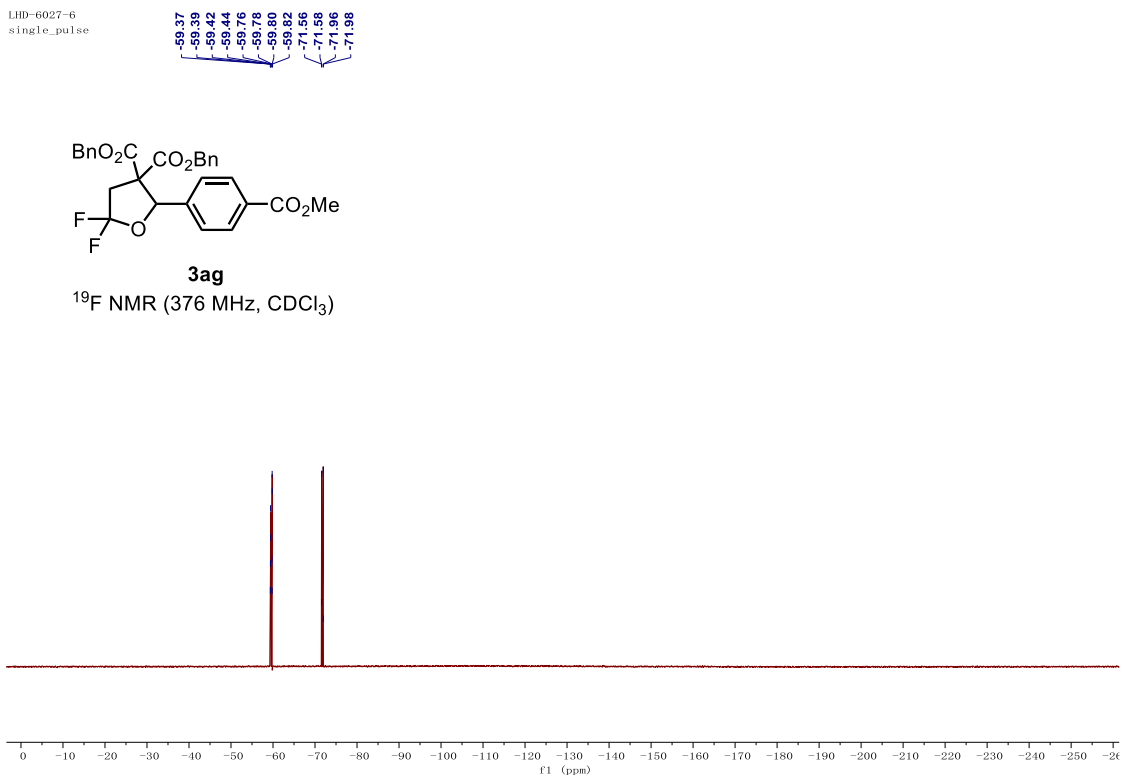

LHD-6033-4  
single\_pulse

7.47  
7.46  
7.45  
7.34  
7.34  
7.34  
7.32  
7.31  
7.29  
7.26  
7.26  
7.25  
7.23  
6.88  
6.86  
6.14  
6.13  
5.21  
4.88  
4.85  
4.47  
4.44  
3.49  
3.47  
3.45  
3.43  
3.41  
3.39  
2.99  
2.98  
2.97  
2.95  
2.95  
2.94  
2.93  
2.92  
0.00

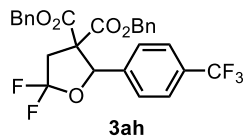

<sup>1</sup>H NMR (400 MHz, CDCl<sub>3</sub>)

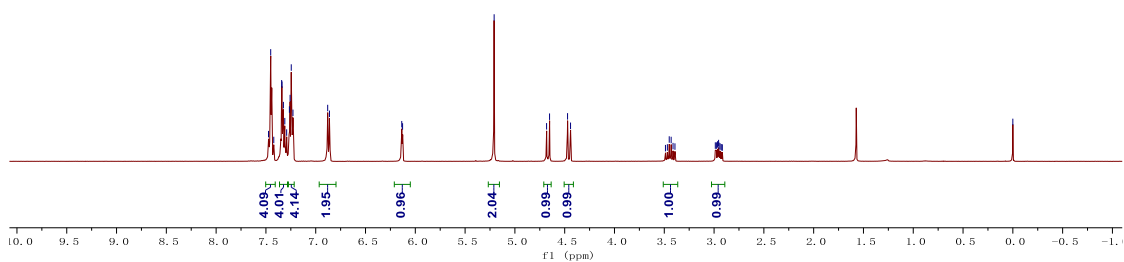

LHD-6033-4  
single\_pulse decoupled gated NOE

167.9  
166.0  
138.6  
134.3  
133.6  
132.5  
131.5  
131.2  
130.8  
130.5  
130.0  
130.0  
128.8  
128.7  
128.7  
128.5  
128.4  
127.8  
127.4  
127.0  
125.2  
125.1  
122.4  
119.7  
83.4  
77.3 CDCl3  
77.0 CDCl3  
76.7 CDCl3  
66.5  
66.3  
63.5  
63.4  
40.9  
40.6  
40.5  
40.2

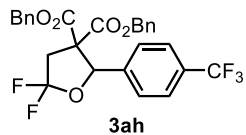

<sup>13</sup>C NMR (101 MHz, CDCl<sub>3</sub>)

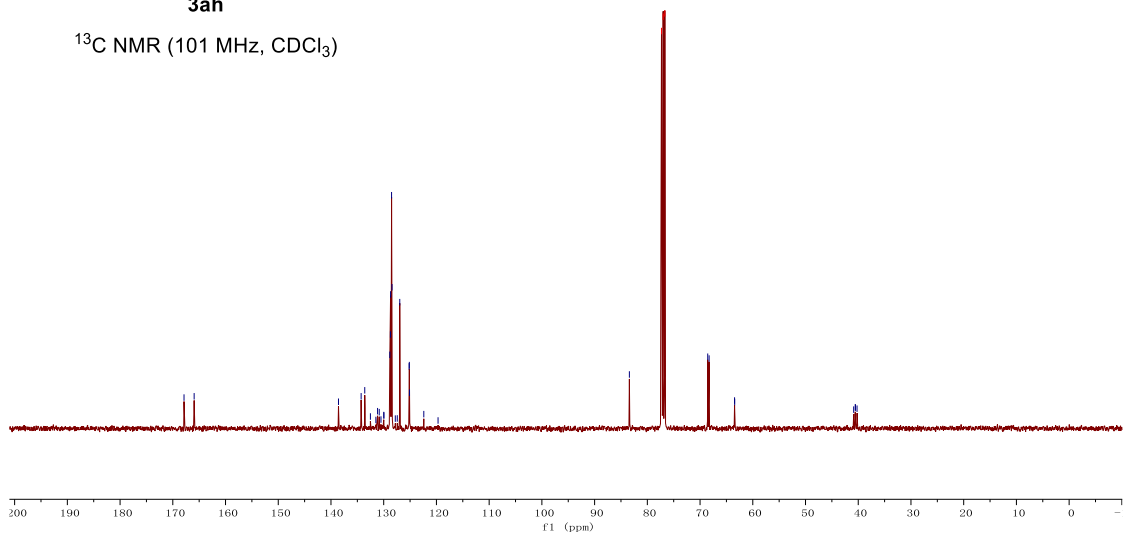

LHD-6033-4  
single\_pulse

-59.49  
-59.51  
-59.53  
-59.55  
-59.87  
-59.89  
-59.91  
-59.93  
-62.52  
-71.33  
-71.34  
-71.35  
-71.36  
-71.37  
-71.71  
-71.72  
-71.73  
-71.74  
-71.75

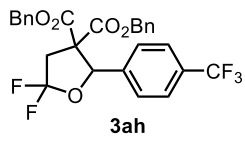

<sup>19</sup>F NMR (376 MHz, CDCl<sub>3</sub>)

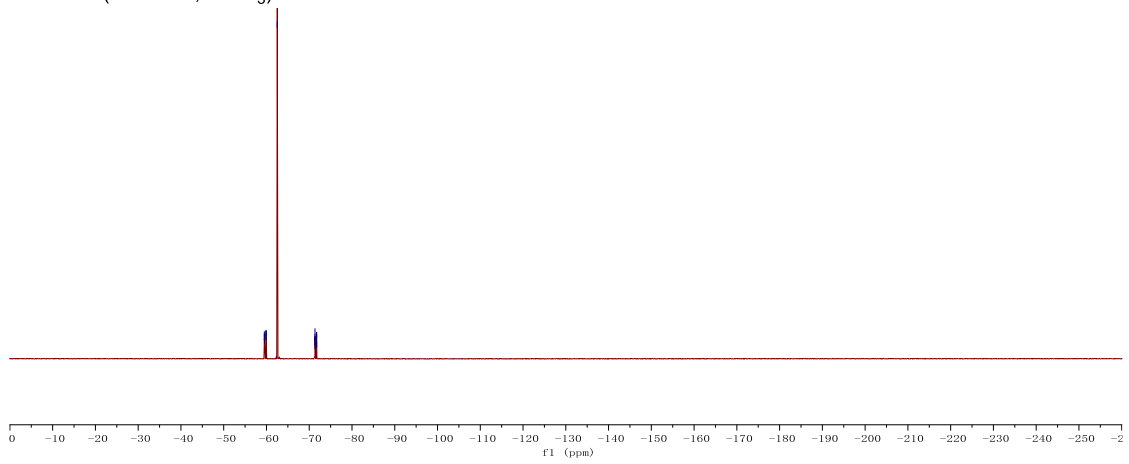

LHD-6105-8  
single\_pulse

7.39  
7.38  
7.36  
7.35  
7.30  
7.28  
6.90  
6.88  
6.09  
6.08  
5.24  
5.22  
4.60  
3.48  
3.46  
3.44  
3.42  
3.40  
3.38  
2.99  
2.98  
2.97  
2.95  
2.94  
2.93  
2.92  
-0.00

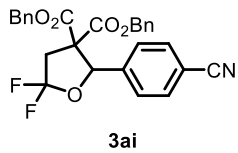

<sup>1</sup>H NMR (400 MHz, CDCl<sub>3</sub>)

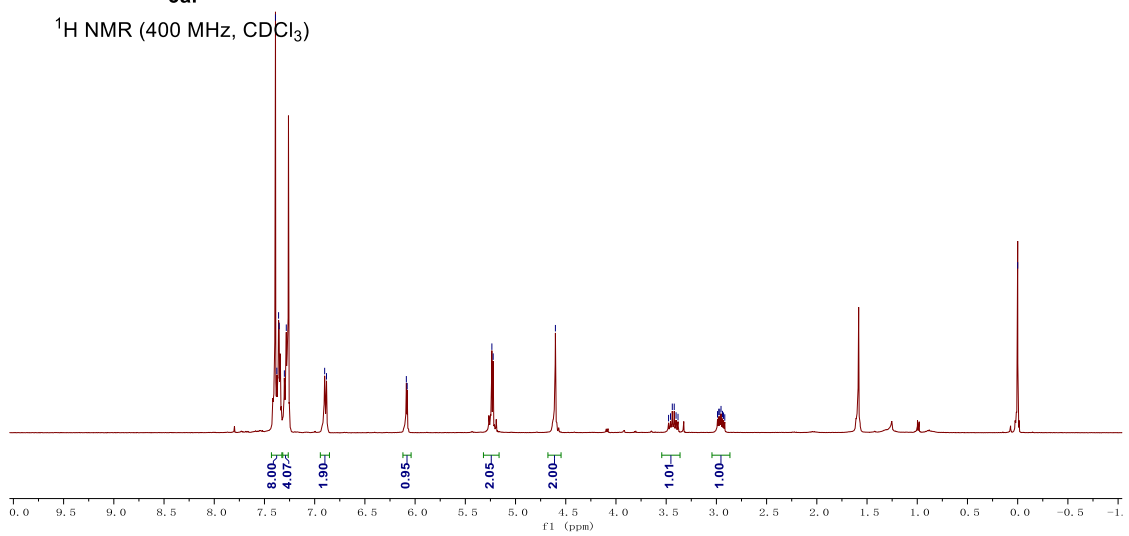

lhd-6105-8  
single pulse decoupled gated NOE

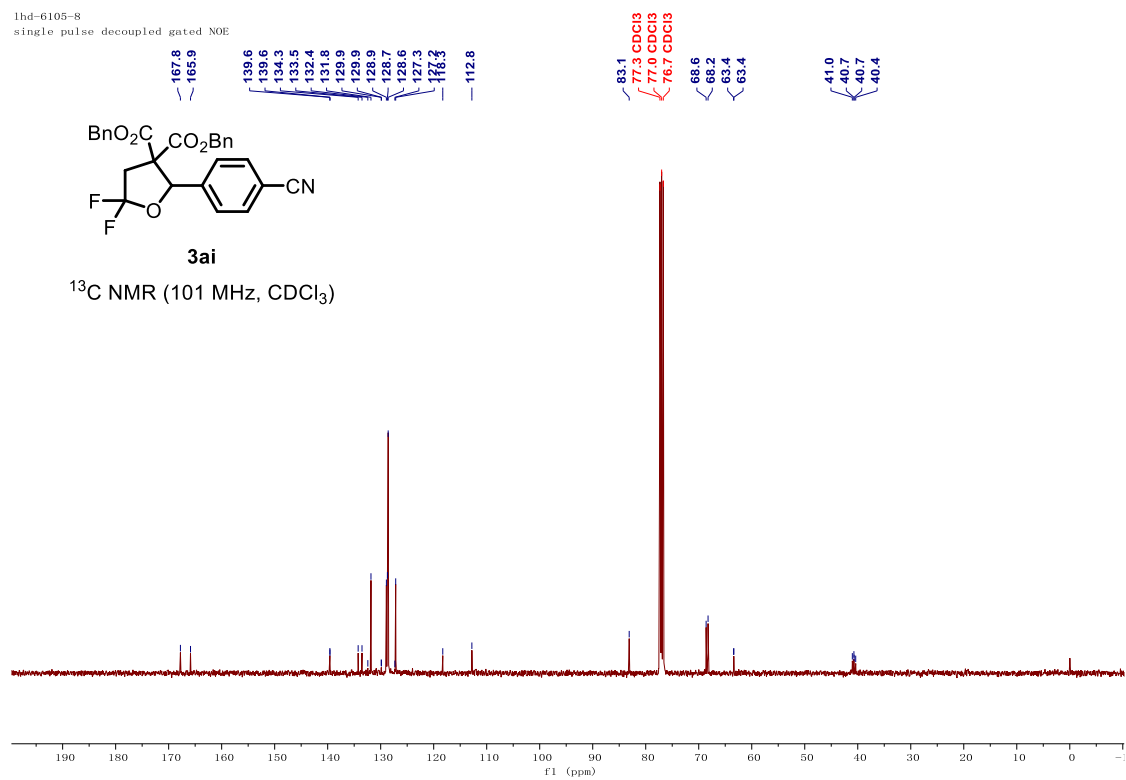

LHD-6105-8  
single\_pulse

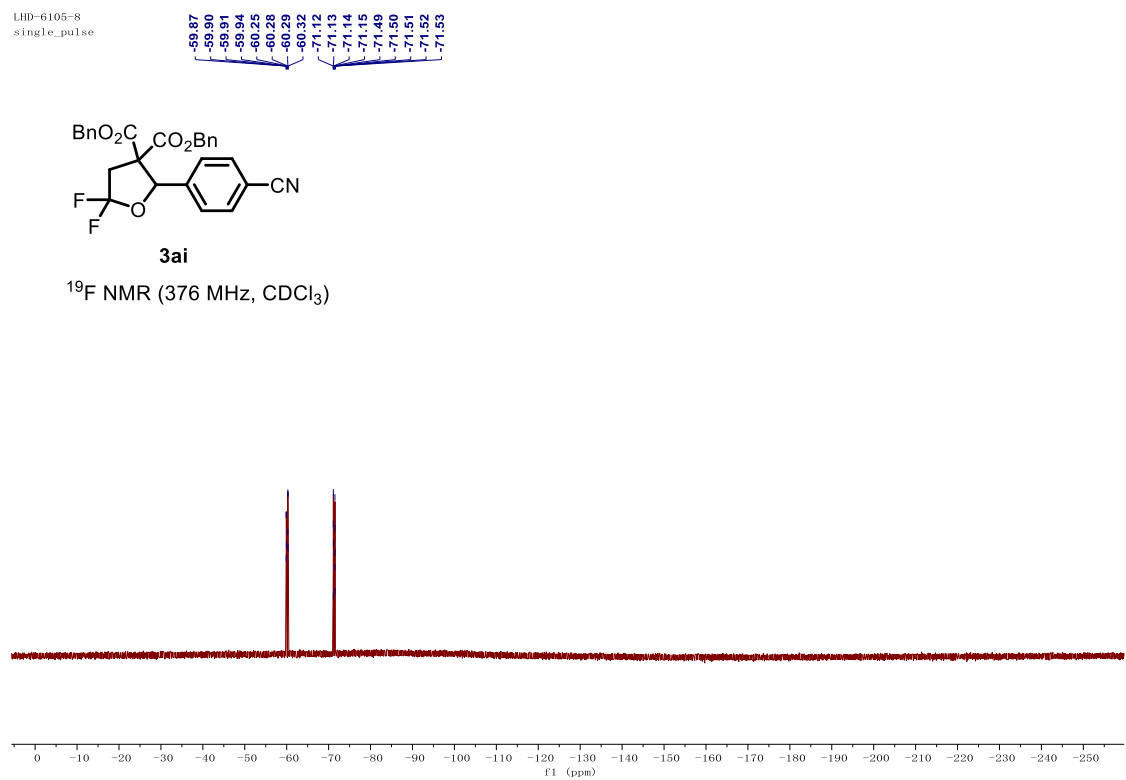

LHD-6105-7  
single\_pulse

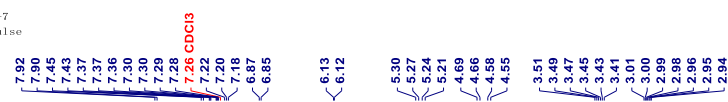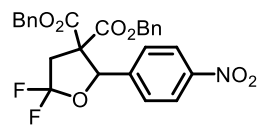

<sup>1</sup>H NMR (400 MHz, CDCl<sub>3</sub>)

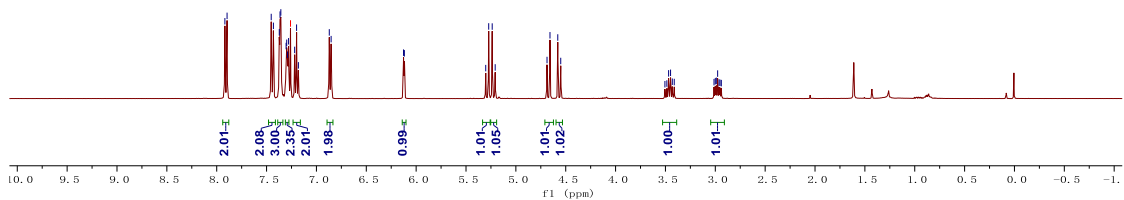

LHD-6105-7  
single\_pulse decoupled gated NOE

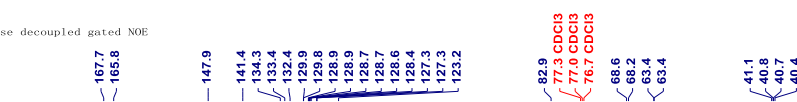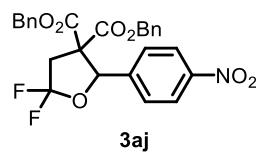

<sup>13</sup>C NMR (101 MHz, CDCl<sub>3</sub>)

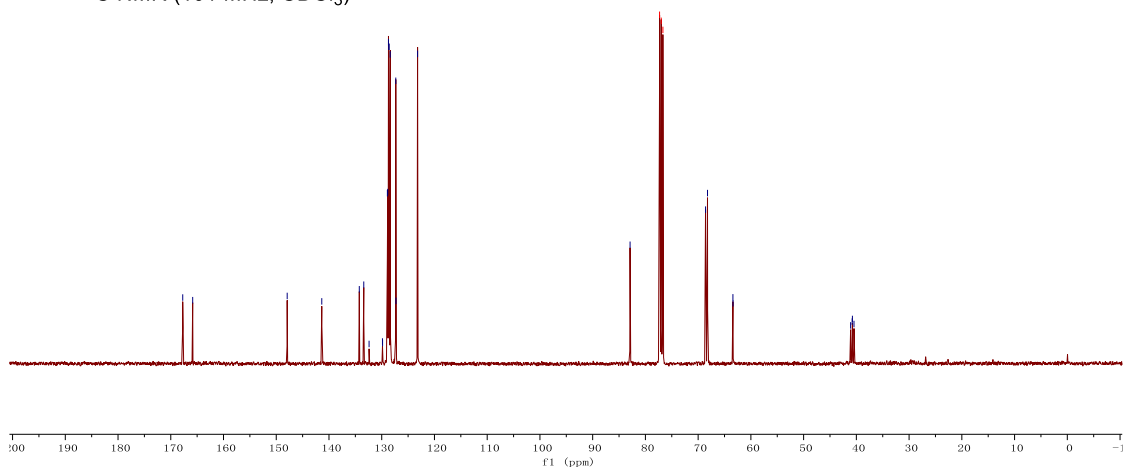

LHD-6105-7  
single\_pulse

59.96  
59.98  
59.99  
60.02  
60.34  
60.36  
60.37  
60.40  
70.88  
70.89  
70.90  
70.91  
70.92  
71.26  
71.27  
71.28  
71.29  
71.30

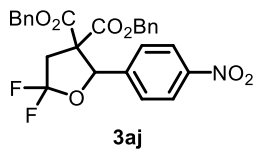

<sup>19</sup>F NMR (376 MHz, CDCl<sub>3</sub>)

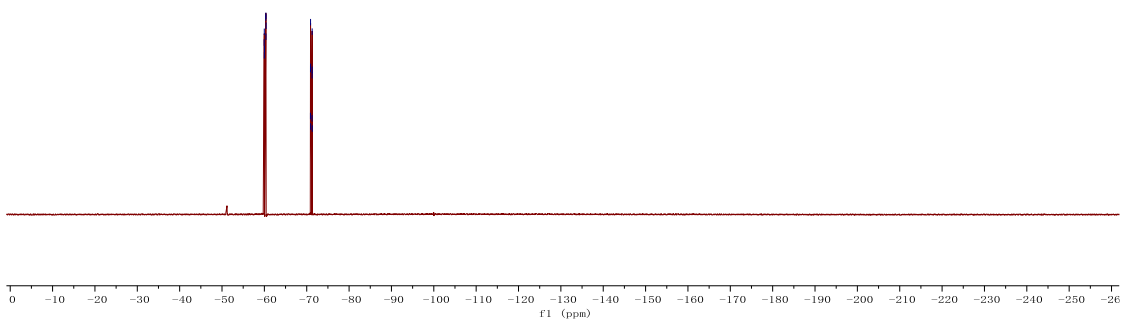

LHD-6013-8  
single\_pulse

7.33  
7.31  
7.31  
7.28  
7.28  
7.24  
7.24  
7.21  
7.03  
7.02  
7.01  
7.00  
6.99  
6.20  
6.19  
5.20  
5.20  
4.84  
4.81  
4.59  
4.36  
3.46  
3.44  
3.44  
3.42  
3.42  
3.40  
3.38  
2.98  
2.97  
2.96  
2.95  
2.94  
2.93  
2.92  
2.91  
0.01

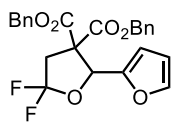

<sup>1</sup>H NMR (400 MHz, CDCl<sub>3</sub>)

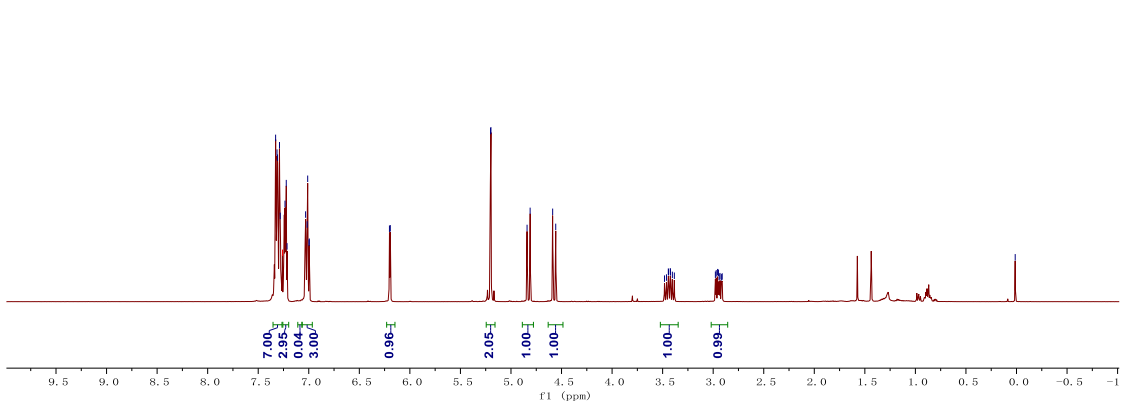

LHD-6013-8  
single pulse decoupled gated NOE

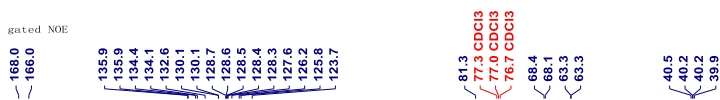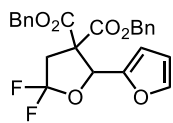

**3ak**

<sup>13</sup>C NMR (101 MHz, CDCl<sub>3</sub>)

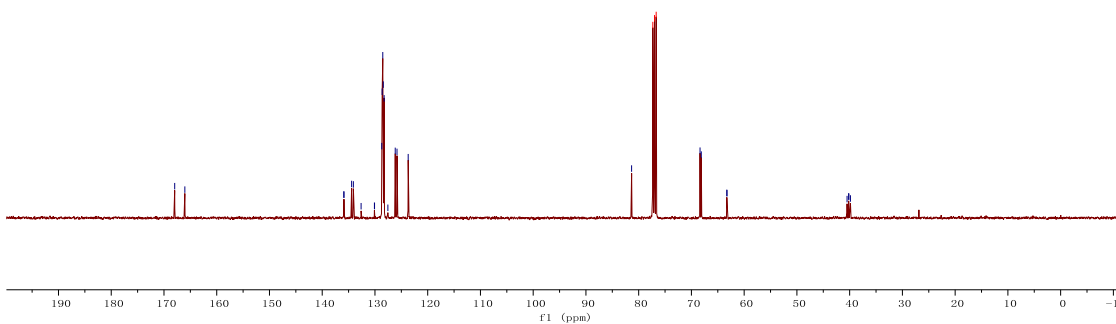

LHD-6013-8  
single\_pulse

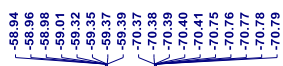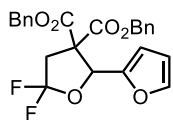

**3ak**

<sup>19</sup>F NMR (376 MHz, CDCl<sub>3</sub>)

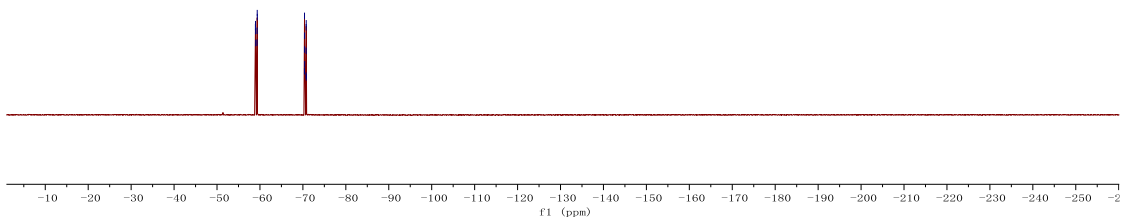



LHD-6013-9  
single\_pulse

7.33  
7.32  
7.31  
7.30  
7.28  
7.27  
7.25  
7.24  
7.09  
7.06  
7.06  
6.34  
6.33  
6.25  
6.24  
6.24  
6.12  
6.12  
5.24  
5.21  
5.20  
5.17  
4.88  
4.81  
4.78  
3.61  
3.69  
3.68  
3.56  
3.56  
3.55  
3.51  
3.03  
3.01  
2.99  
2.97

-0.00

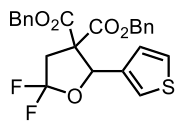

**3al**

<sup>1</sup>H NMR (400 MHz, CDCl<sub>3</sub>)

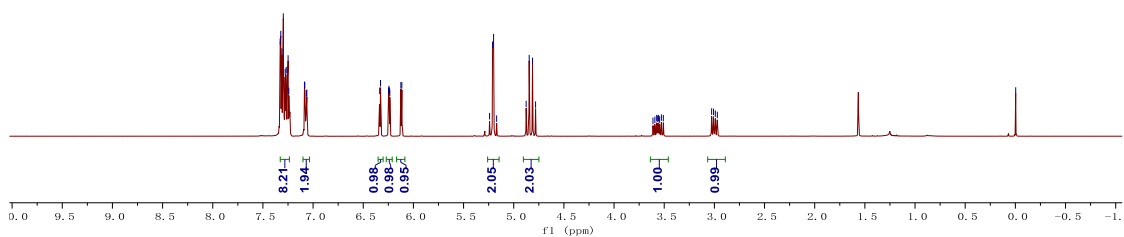

LHD-6013-9  
single\_pulse decoupled gated NOE

167.5  
165.0  
147.9  
147.9  
143.7  
134.5  
134.2  
133.0  
130.5  
128.7  
128.6  
128.6  
128.5  
128.4  
128.4  
127.9  
110.8  
110.4  
78.2  
77.3 CDCl3  
77.0 CDCl3  
76.7 CDCl3  
68.6  
68.2  
62.8  
62.6  
40.0  
39.7  
39.3

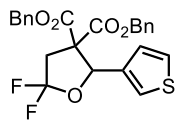

**3al**

<sup>13</sup>C NMR (101 MHz, CDCl<sub>3</sub>)

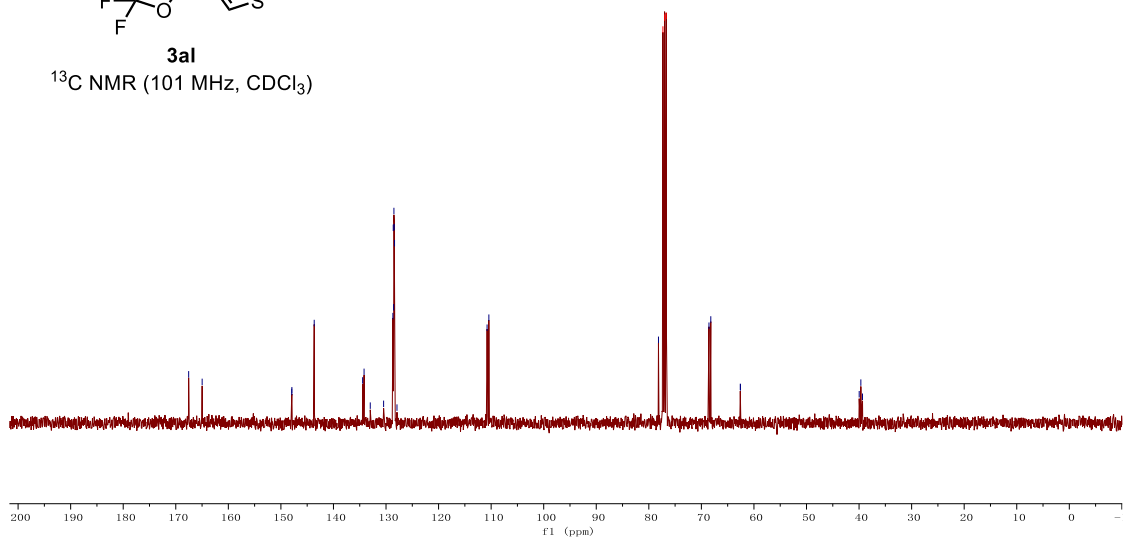

LHD-6013-9  
single\_pulse

58.22  
58.25  
58.27  
58.29  
58.60  
58.63  
58.66  
70.10  
70.13  
70.48  
70.51

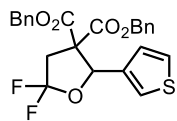

**3al**

<sup>19</sup>F NMR (376 MHz, CDCl<sub>3</sub>)

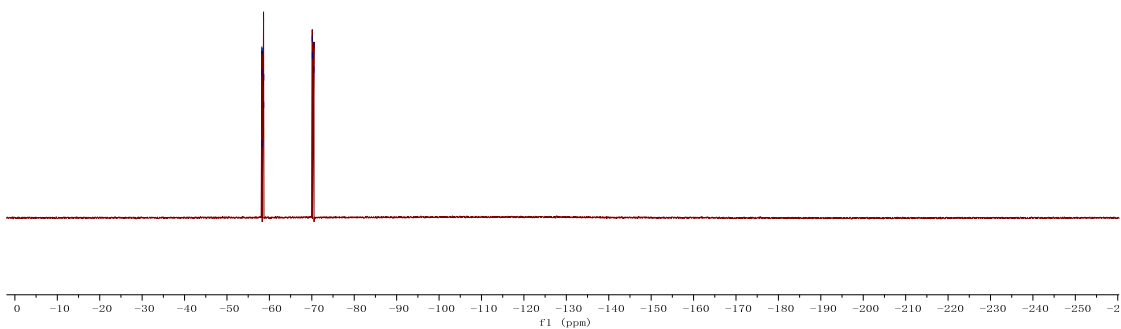

LHD-6087-3-2  
single\_pulse

7.34  
7.33  
7.32  
7.27  
7.25  
7.25  
7.13  
7.12

5.17  
5.16  
5.10  
5.10

3.36  
3.34  
3.32  
3.30  
3.29  
3.27  
2.94  
2.93  
2.92  
2.91  
2.89  
2.88  
2.87  
2.83  
2.73  
2.71  
2.70  
2.67

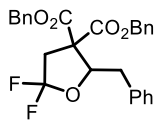

**3am**

<sup>1</sup>H NMR (400 MHz, CDCl<sub>3</sub>)

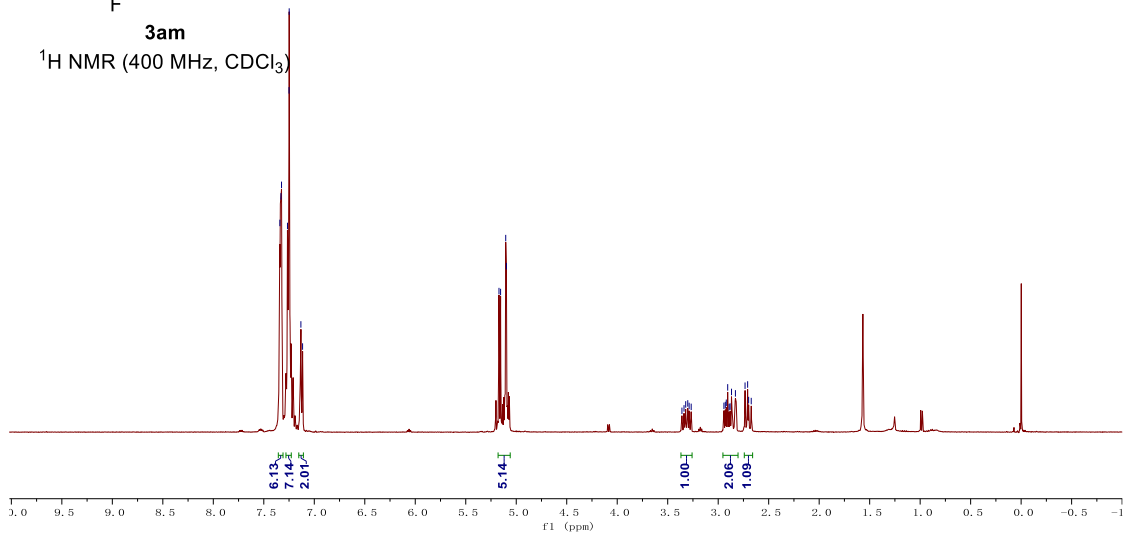

LHD-6087-3-2  
single pulse decoupled gated NOE

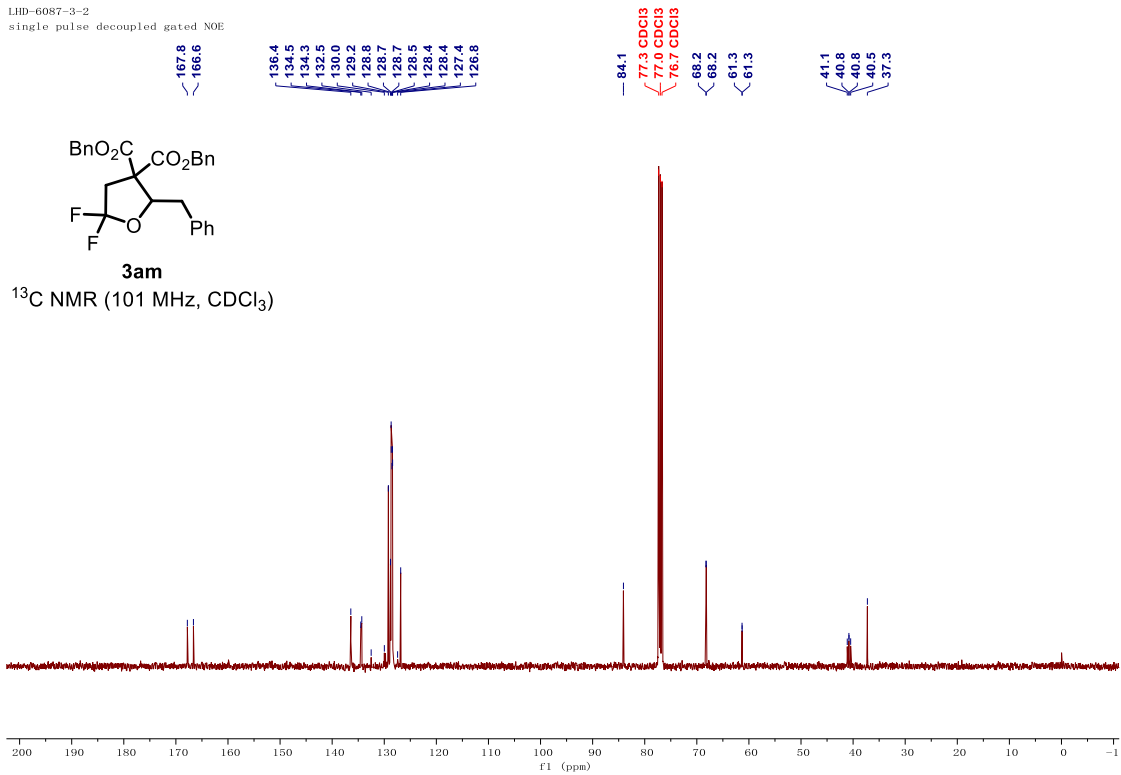

LHD-6087-3-2  
single\_pulse

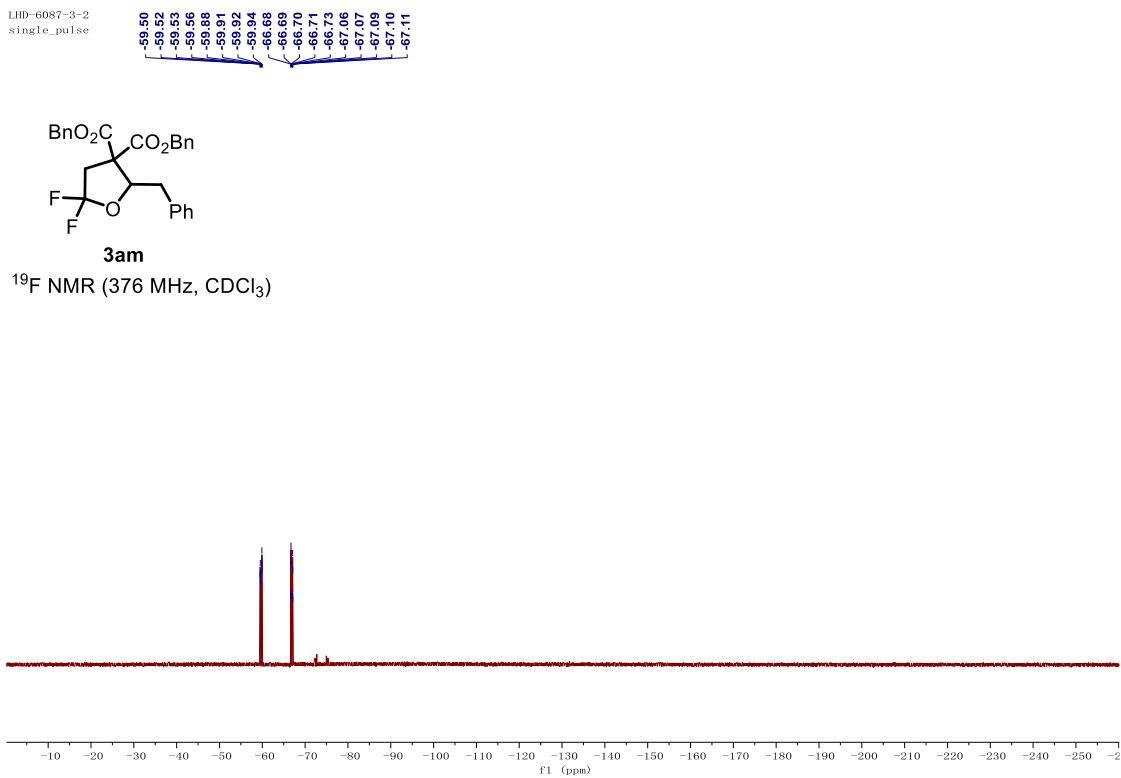

LHD-5191-5-2  
single\_pulse

7.34  
7.35  
7.32  
7.28  
7.25  
7.23  
7.21  
7.19  
7.04  
7.03  
5.18  
5.15  
5.15  
5.13  
5.10  
5.04  
5.01  
4.90  
4.89  
4.85  
4.82  
4.82  
4.82  
4.85  
3.31  
3.29  
3.27  
3.25  
3.24  
3.22  
2.90  
2.89  
2.88  
2.87  
2.85  
2.84  
2.83  
2.82  
2.80  
2.79  
2.78  
2.65  
2.63  
2.62  
2.61  
2.60  
2.59  
2.57  
1.74  
1.73  
1.72  
1.61  
1.61  
1.65

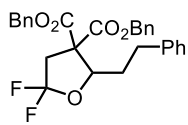

**3an**

<sup>1</sup>H NMR (400 MHz, CDCl<sub>3</sub>)

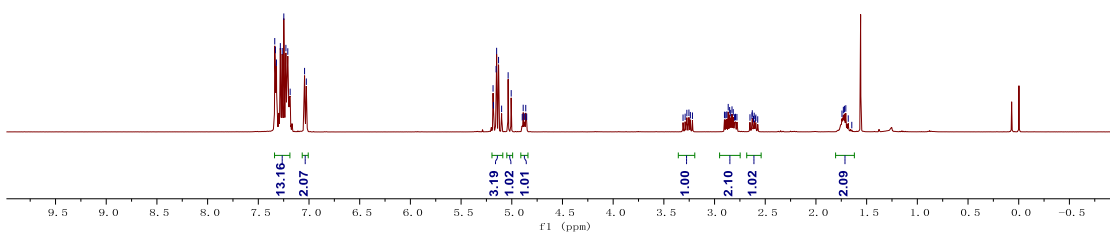

LHD-5191-5-2  
single\_pulse decoupled gated NOE

167.9  
166.6  
140.4  
134.6  
134.3  
132.5  
130.0  
128.8  
128.6  
128.4  
128.3  
127.5  
126.1  
82.6  
77.3 CDCl3  
77.0 CDCl3  
76.7 CDCl3  
68.1  
61.4  
61.4  
41.1  
40.8  
40.8  
40.4  
32.8  
32.0

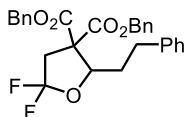

**3an**

<sup>13</sup>C NMR (101 MHz, CDCl<sub>3</sub>)

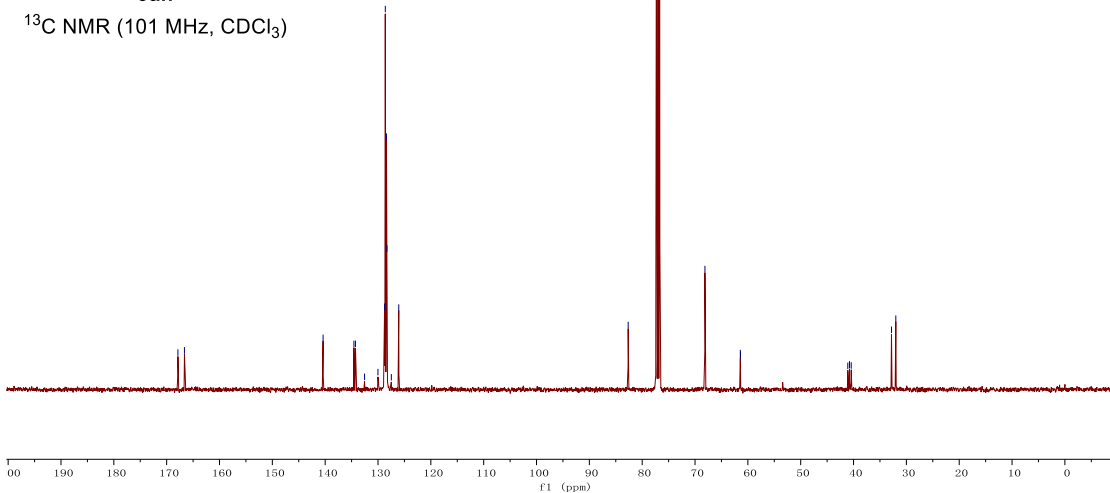

LHD-5191-5-2  
single\_pulse

59.34  
59.36  
59.40  
59.73  
59.75  
66.95  
66.97  
67.35  
67.37

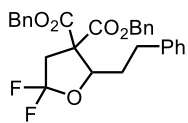

**3an**

<sup>19</sup>F NMR (376 MHz, CDCl<sub>3</sub>)

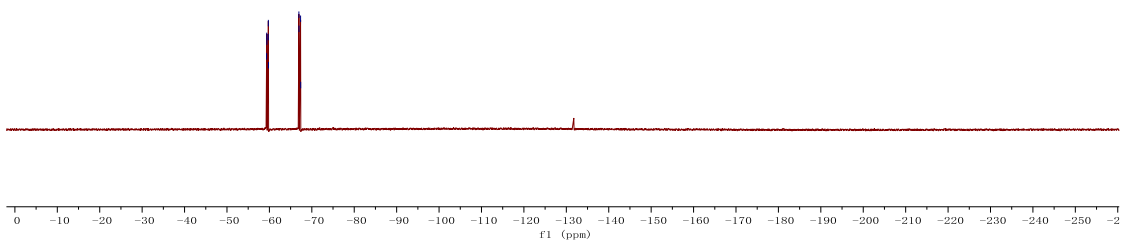

LHD-6035-3-3  
single\_pulse

7.34  
7.33  
7.32  
7.28  
7.27  
7.26  
7.25

5.20  
5.17  
5.15  
5.07  
5.04  
4.74  
4.73  
4.72

3.28  
3.26  
3.25  
3.23  
3.19  
2.84  
2.83  
2.82  
2.80  
2.79  
2.78  
2.77  
1.69  
1.66  
1.63  
1.57  
1.54  
1.52  
1.46  
1.43  
1.42  
1.39  
1.10  
1.07  
1.04  
1.01  
0.96  
0.93  
0.92  
0.87

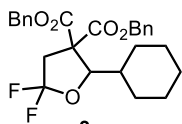

**3ao**

<sup>1</sup>H NMR (400 MHz, CDCl<sub>3</sub>)

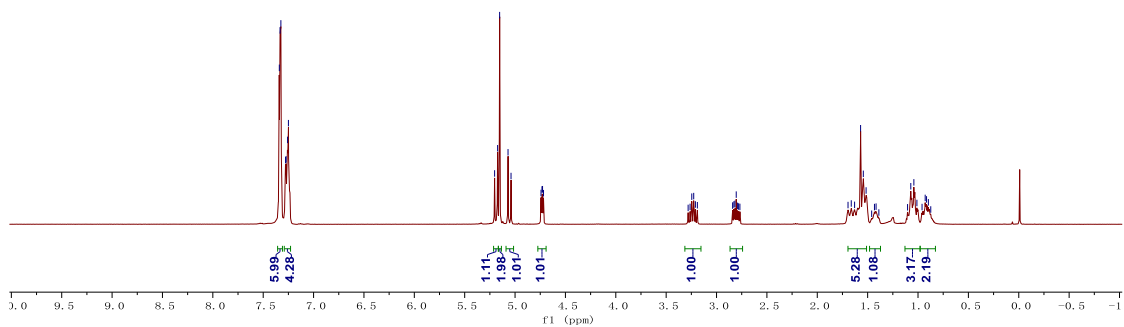

LHD-6035-3-2  
single pulse decoupled gated NOE

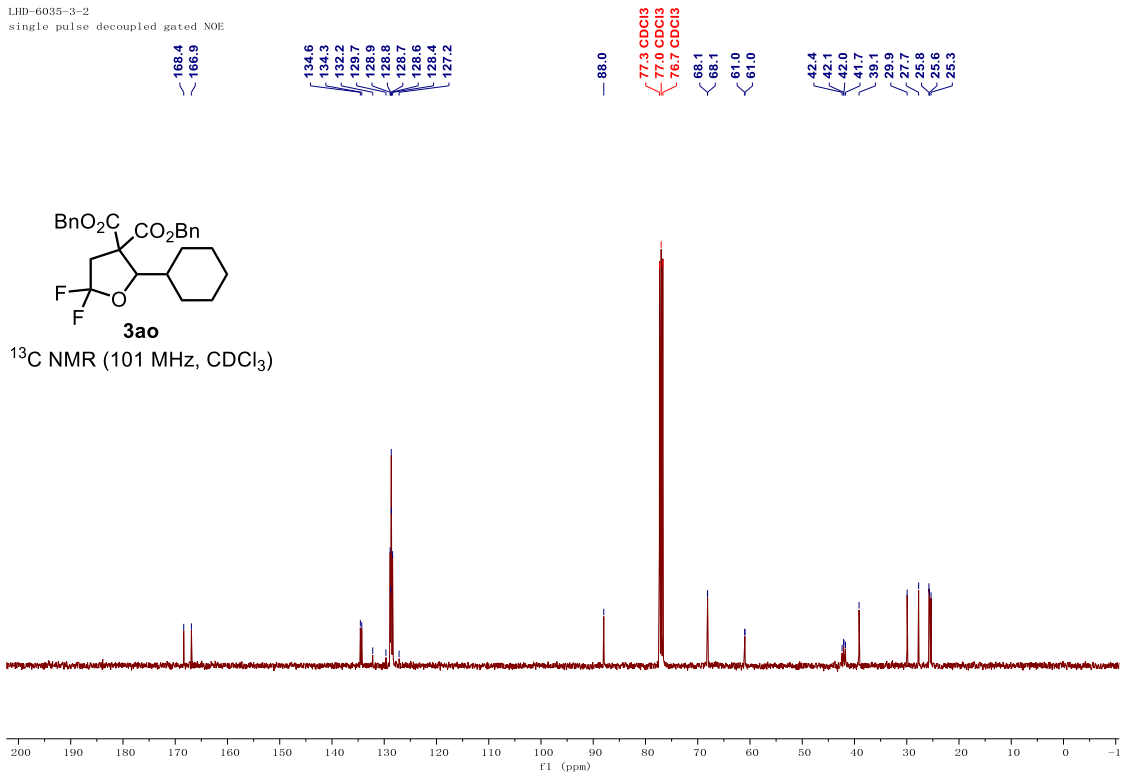

LHD-6035-3-2  
single\_pulse

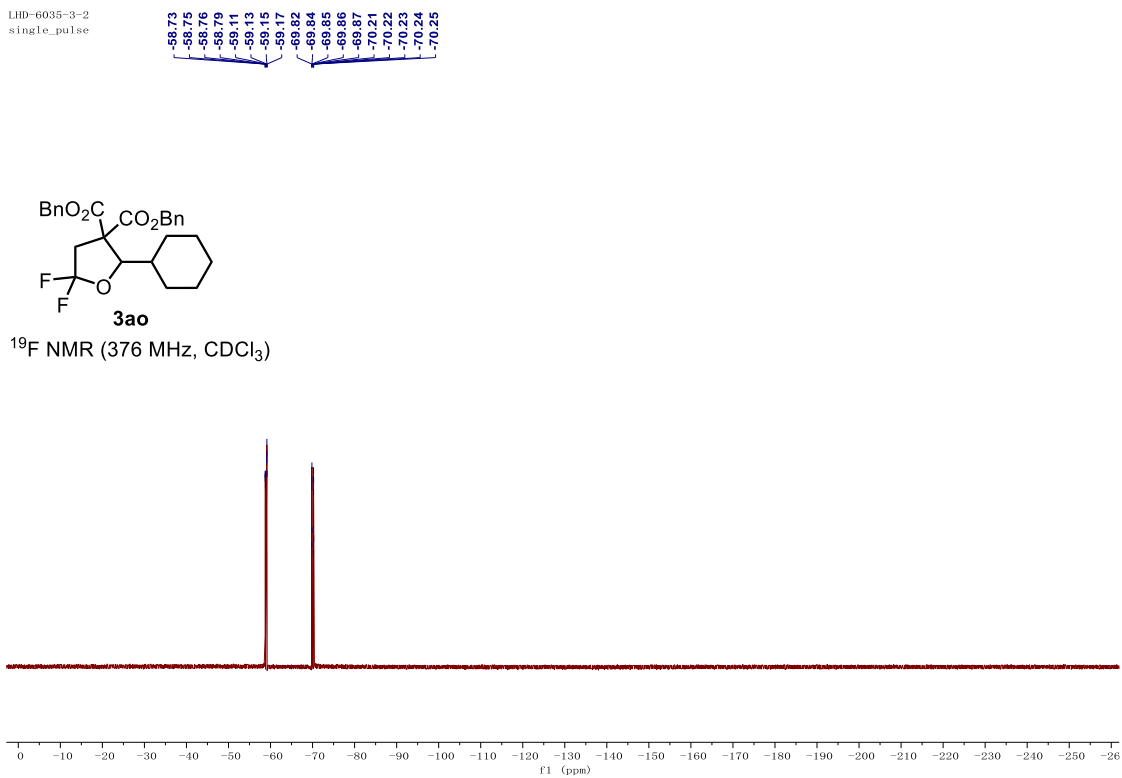

LHD-6097-3  
single\_pulse

7.34  
7.33  
7.33  
7.32  
7.26  
7.25  
7.23

5.19  
5.16  
5.14  
5.13  
5.10  
4.78  
4.77  
4.76  
4.75  
3.31  
3.29  
3.27  
3.25  
3.24  
3.22  
2.87  
2.86  
2.85  
2.84  
2.82  
2.81  
2.80  
1.89  
1.88  
1.86  
1.84  
1.83  
1.81  
0.92  
0.90  
0.00

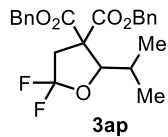

<sup>1</sup>H NMR (400 MHz, CDCl<sub>3</sub>)

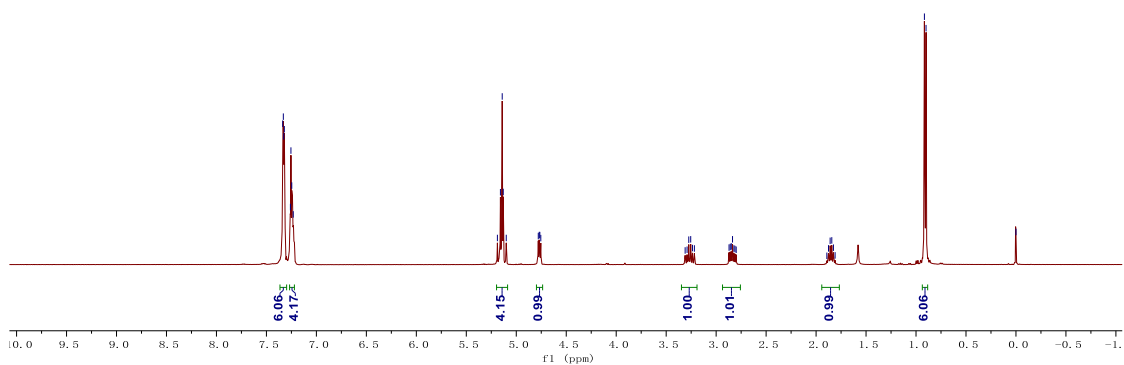

LHD-6097-2  
single\_pulse decoupled gated NOE

168.4  
134.4  
132.2  
129.8  
128.6  
128.6  
127.3  
99.0  
77.3 CDCl<sub>3</sub>  
77.0 CDCl<sub>3</sub>  
76.7 CDCl<sub>3</sub>  
68.0  
67.1  
43.6  
43.2  
42.9  
34.2  
19.2  
17.9

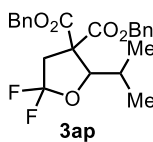

<sup>13</sup>C NMR (101 MHz, CDCl<sub>3</sub>)

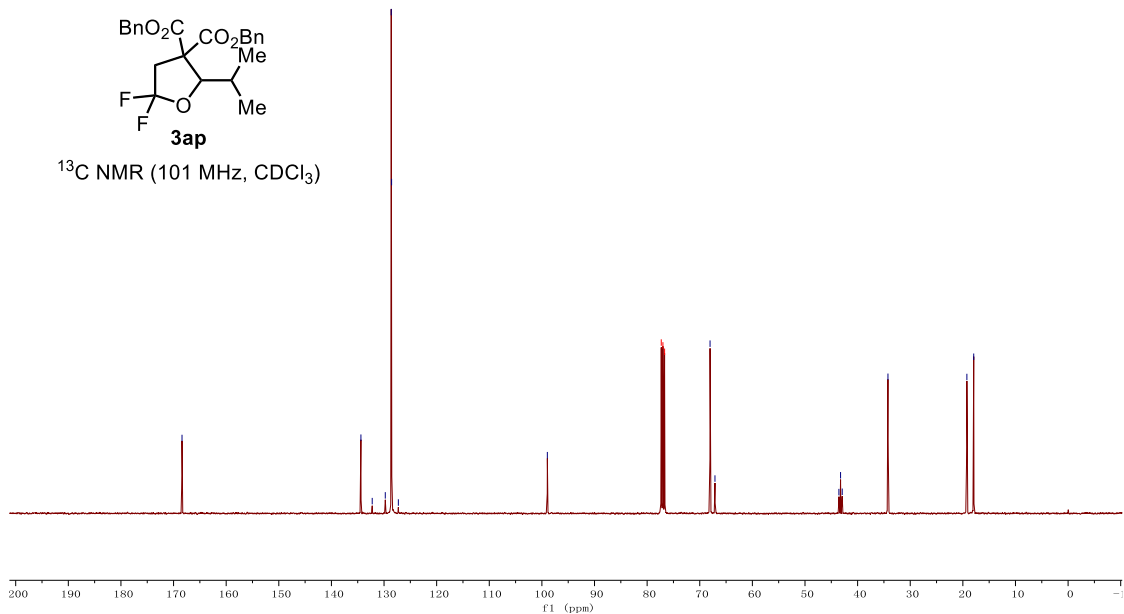

LHD-6097-3  
single\_pulse

58.96  
58.98  
59.00  
59.02  
59.34  
59.37  
59.38  
59.40  
69.87  
69.88  
69.89  
69.90  
70.25  
70.26  
70.27  
70.28

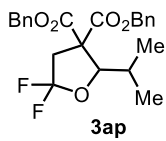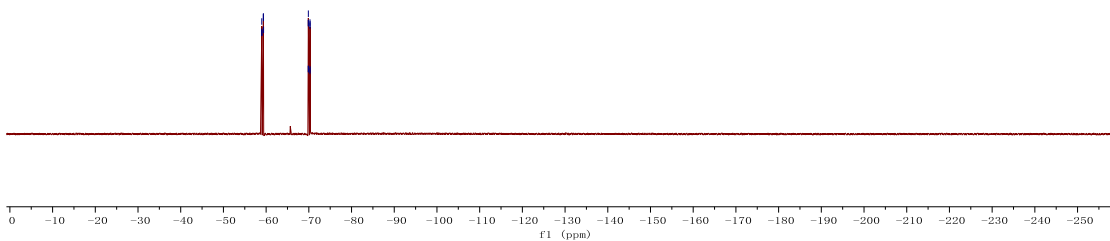

7.33  
7.32  
7.31  
7.25  
7.24  
7.23  
7.22  
7.21  
5.70  
5.69  
5.68  
5.66  
5.64  
5.63  
5.62  
5.47  
5.46  
5.45  
5.44  
5.43  
5.42  
5.42  
5.39  
5.38  
5.38  
5.22  
5.19  
5.18  
5.18  
5.16  
5.16  
5.15  
5.15  
5.11  
5.08  
5.06  
5.03  
3.29  
3.27  
3.25  
3.24  
3.23  
3.23  
3.21  
3.19  
2.93  
2.92  
2.90  
2.90  
2.89  
2.88  
2.87  
0.00

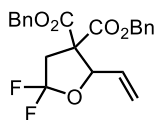

<sup>1</sup>H NMR (400 MHz, CDCl<sub>3</sub>)

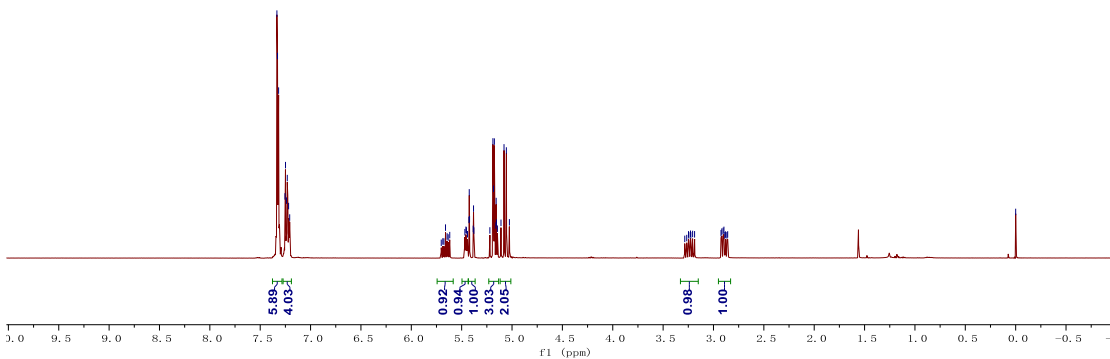



LHD-6013-1  
single pulse decoupled gated NOE

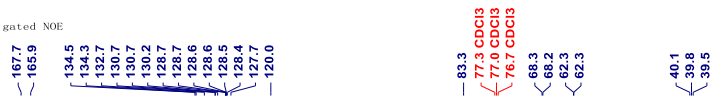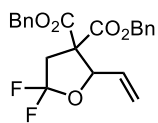

**3aq**

<sup>13</sup>C NMR (101 MHz, CDCl<sub>3</sub>)

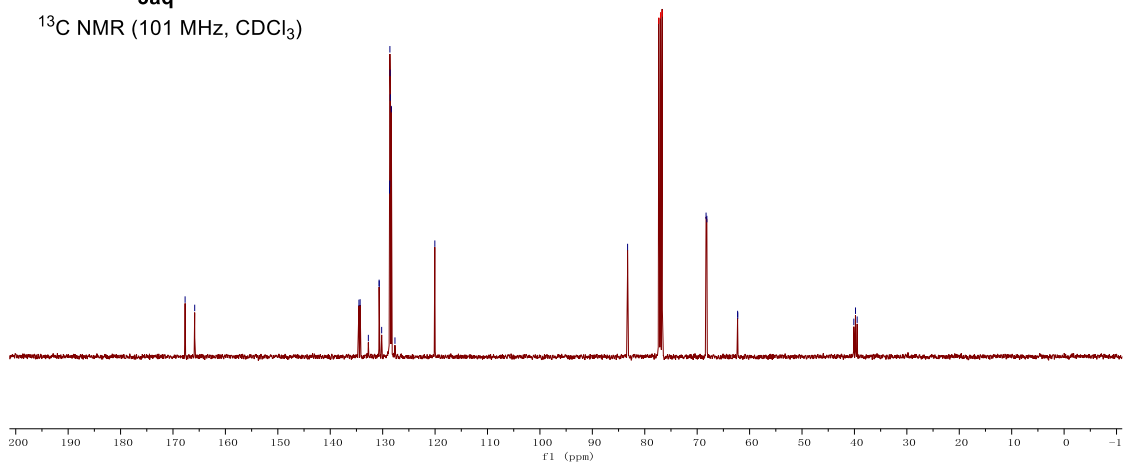

LHD-6013-1  
single\_pulse

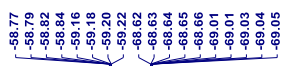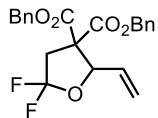

**3aq**

<sup>19</sup>F NMR (376 MHz, CDCl<sub>3</sub>)

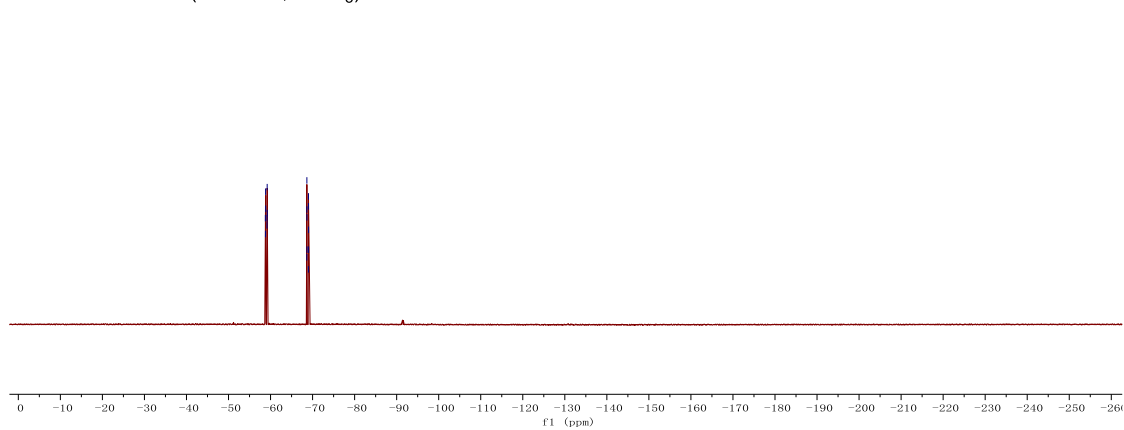

LHD-5185-4-3  
single\_pulse

7.35  
7.32  
7.31  
7.26  
7.23  
7.22  
7.19

5.96  
5.95

5.25  
5.22  
5.19  
5.16  
5.11

3.50  
3.48  
3.47  
3.46  
3.45  
3.44  
3.42  
3.40

3.04  
3.02  
3.02  
3.00  
3.00  
2.88  
2.88

-0.00

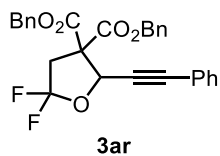

<sup>1</sup>H NMR (400 MHz, CDCl<sub>3</sub>)

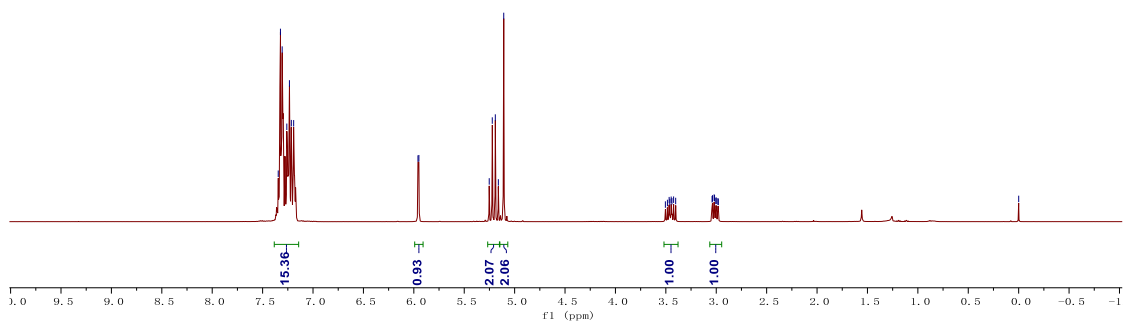

LHD-5185-4-3  
single\_pulse decoupled gated NOE

166.9  
165.0  
134.4  
134.3  
133.2  
131.9  
130.6  
129.3  
128.7  
128.6  
128.5  
128.3  
128.2  
128.0  
120.9

89.7  
81.3  
77.3 CDCl<sub>3</sub>  
77.2 CDCl<sub>3</sub>  
76.7 CDCl<sub>3</sub>  
75.4  
68.6  
68.4  
63.9  
39.8  
39.5  
39.2

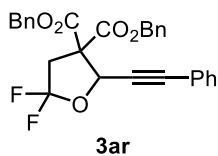

<sup>13</sup>C NMR (101 MHz, CDCl<sub>3</sub>)

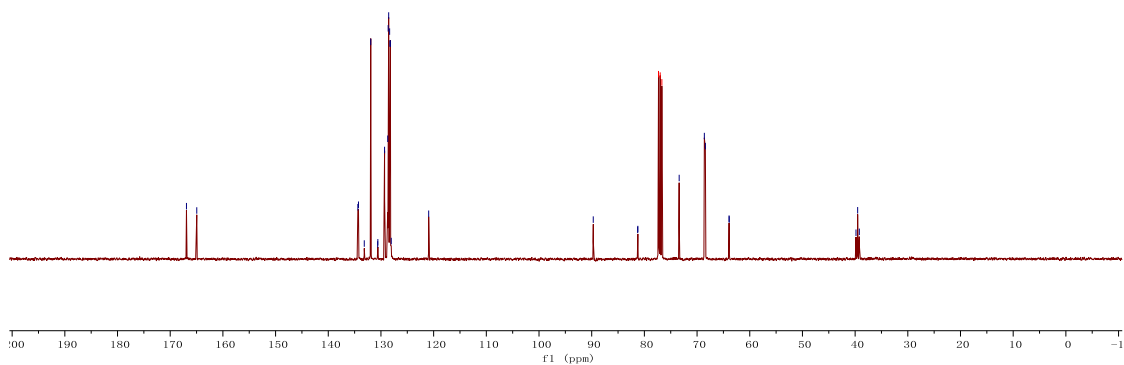

LHD-5185-4-3  
single\_pulse

58.89  
58.92  
58.94  
58.97  
59.27  
59.30  
59.32  
59.35  
66.80  
66.82  
67.16  
67.20

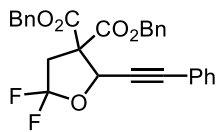

**3ar**

<sup>19</sup>F NMR (376 MHz, CDCl<sub>3</sub>)

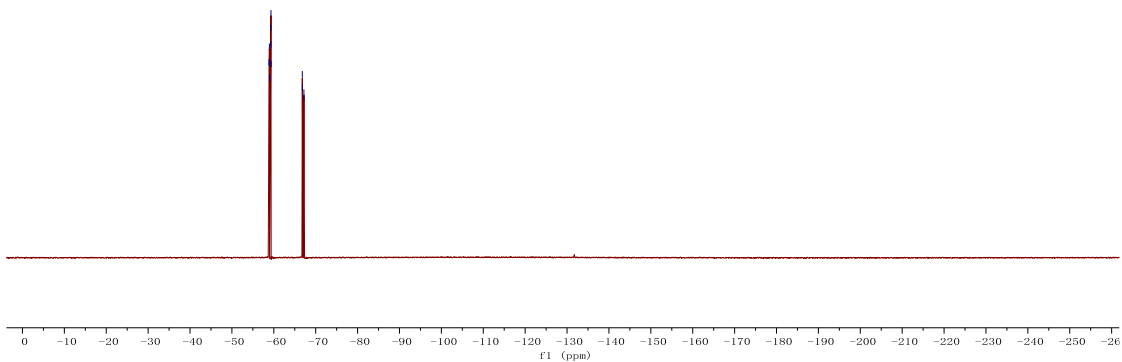

LHD-6087-5-2  
single\_pulse

7.34  
7.33  
7.31  
7.29  
7.27  
7.25  
7.23  
7.21  
7.19  
6.98  
6.96  
6.93  
6.91  
6.10  
6.10  
6.09  
6.08  
5.21  
5.19  
4.74  
4.71  
4.70  
4.67  
4.50  
4.47  
4.44  
3.48  
3.46  
3.44  
3.42  
3.40  
3.39  
3.37  
3.35  
2.98  
2.96  
2.94  
2.92

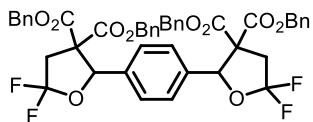

**3as**

<sup>1</sup>H NMR (400 MHz, CDCl<sub>3</sub>)

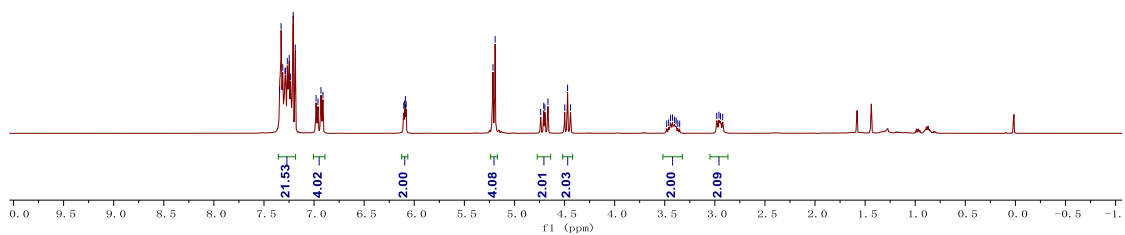

LHD-6087-5-2  
single pulse decoupled gated NOE

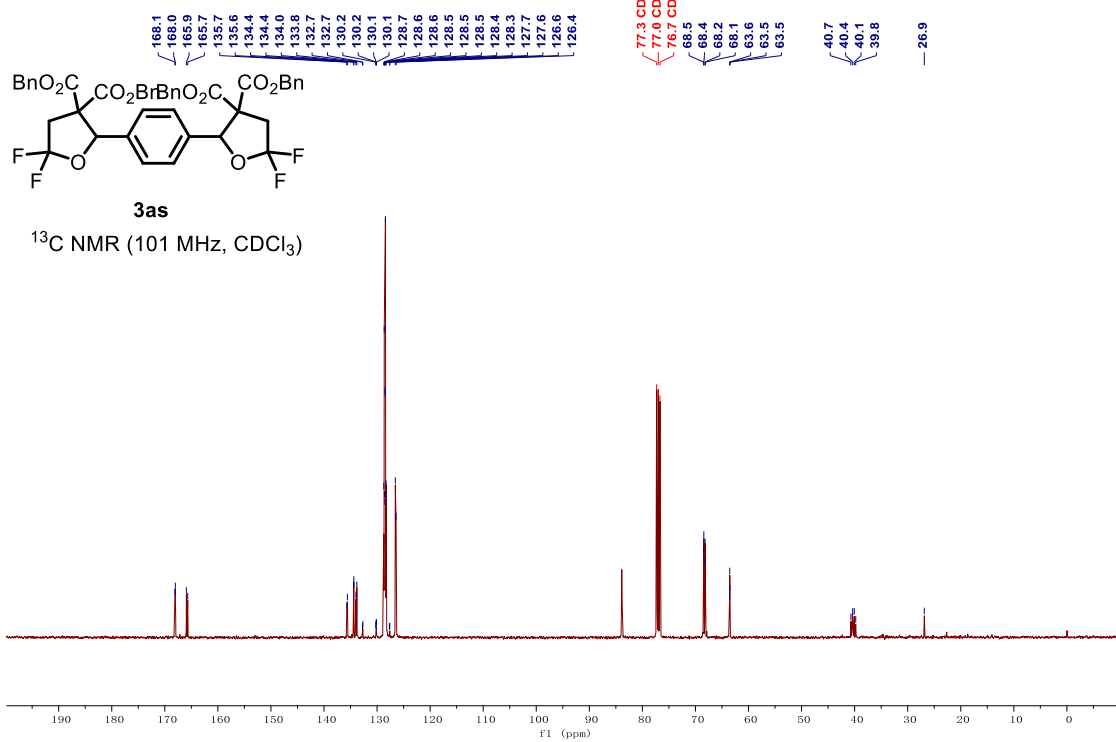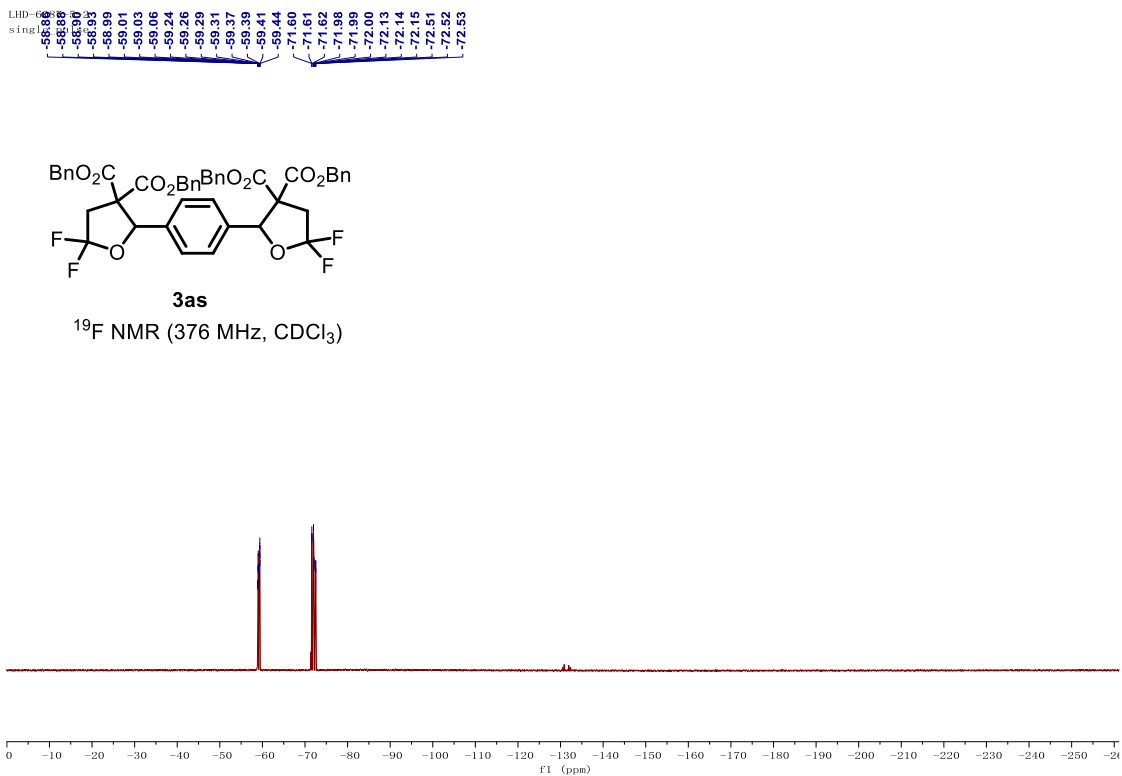

LHD-6003-3  
single\_pulse

7.34  
7.33  
7.32  
7.29  
7.28  
7.26

5.21  
5.18  
5.15  
5.12

3.13  
3.11  
3.09

1.43

-0.00

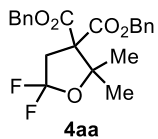

<sup>1</sup>H NMR (400 MHz, CDCl<sub>3</sub>)

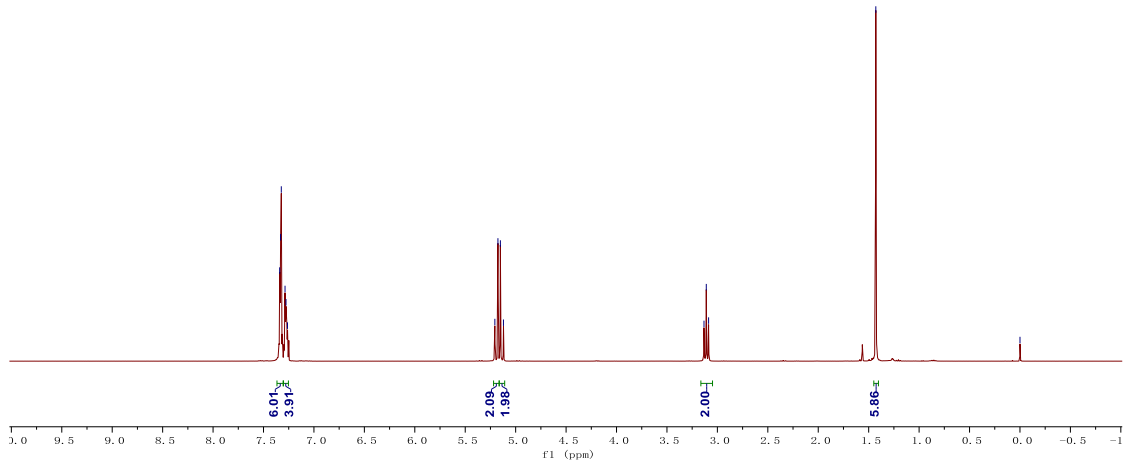

LHD-6003-3  
single\_pulse decoupled gated NOE

167.5

134.6  
132.1  
129.5  
128.6  
128.4  
127.0

87.8

77.3 CDCl<sub>3</sub>  
77.0 CDCl<sub>3</sub>  
76.7 CDCl<sub>3</sub>

67.9  
65.3

41.8  
41.5  
41.2

24.8

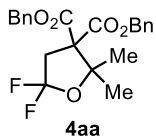

<sup>13</sup>C NMR (101 MHz, CDCl<sub>3</sub>)

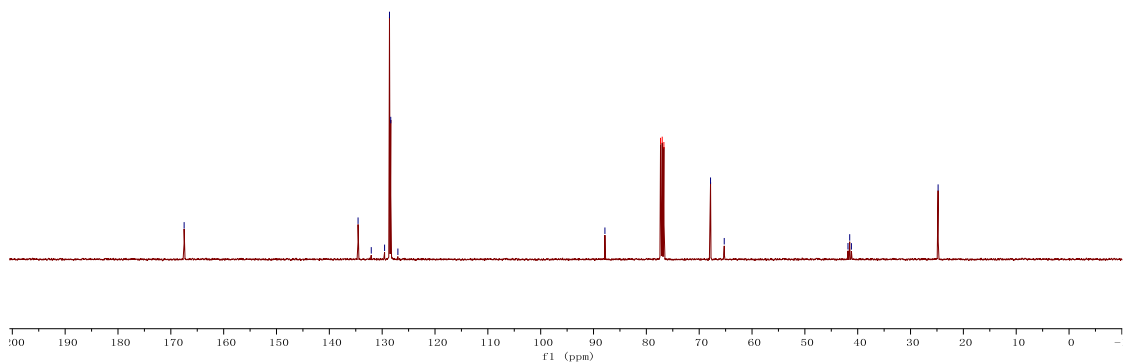

LHD-6003-3  
single\_pulse

-59.32  
-59.34  
-59.37

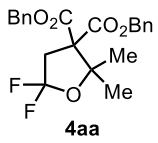

<sup>19</sup>F NMR (376 MHz, CDCl<sub>3</sub>)

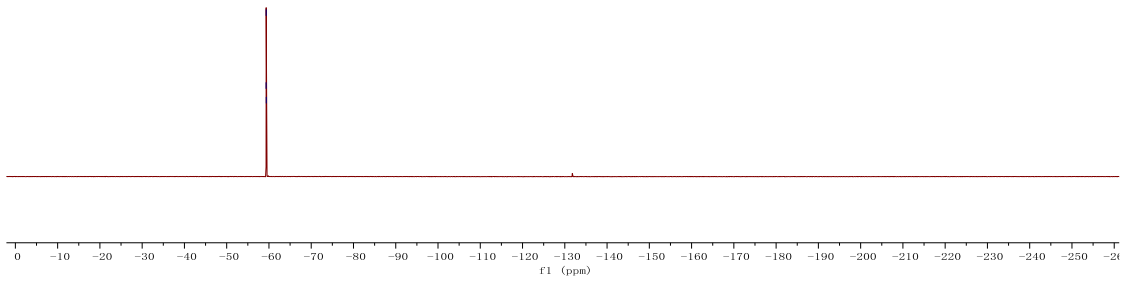

LHD-6097-2  
single\_pulse

7.34  
7.33  
7.32  
7.29  
7.28  
7.27  
7.26

5.16  
5.13  
5.12  
5.09

3.15  
3.12  
3.10  
2.44  
2.42  
2.40  
2.38  
2.37  
2.35  
2.33

0.98  
0.96  
0.93  
0.91

-0.00

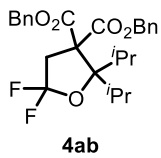

<sup>1</sup>H NMR (400 MHz, CDCl<sub>3</sub>)

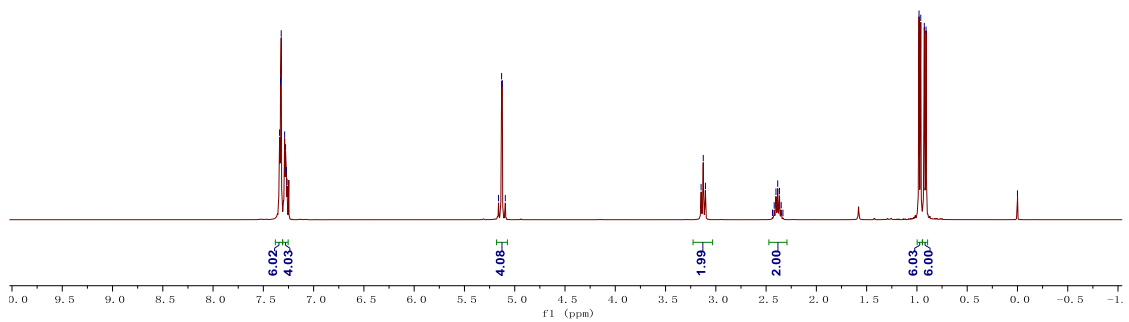

LHD-6097-2  
single pulse decoupled gated NOE

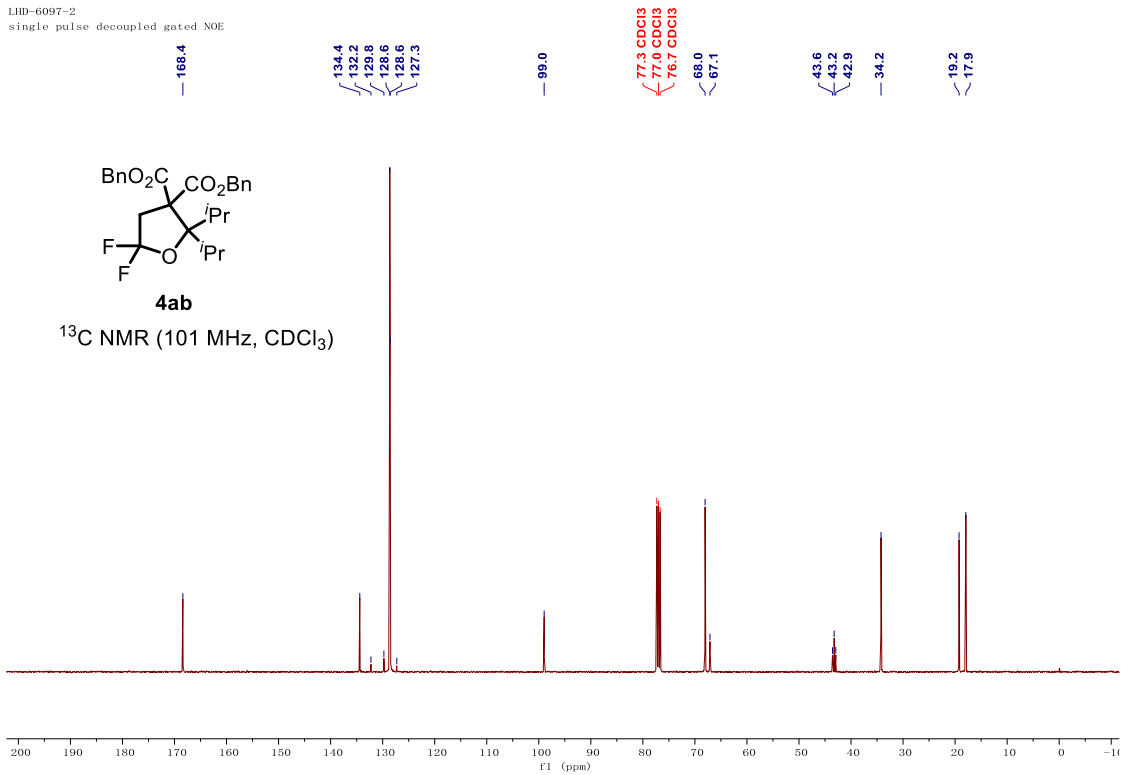

LHD-6097-2  
single\_pulse

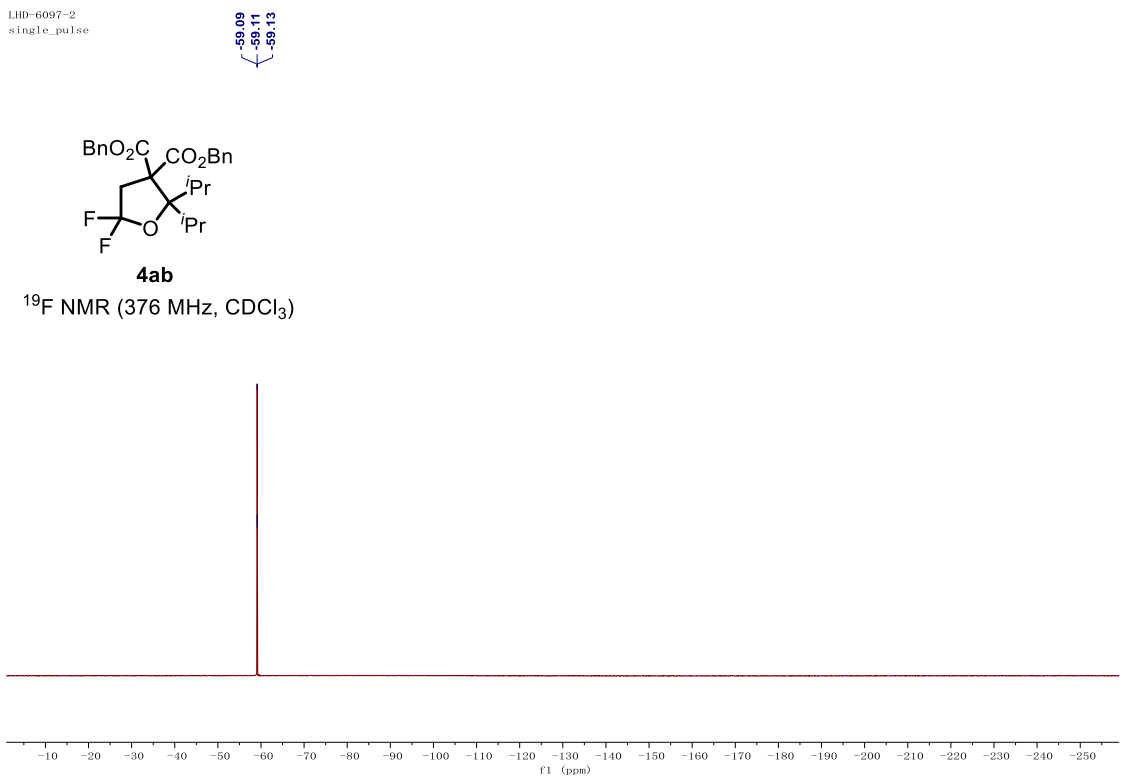

LHD-6009-2  
single\_pulse

7.34  
7.34  
7.33  
7.32  
7.29  
7.28  
7.27  
7.26

5.21  
5.18  
5.16  
5.13

3.04  
3.01  
2.99  
2.45  
2.42  
2.40  
2.37  
2.35  
2.31  
2.01  
1.99  
1.97  
1.94  
1.91  
1.90  
1.55  
1.53  
1.52  
1.50  
1.48  
1.47  
1.46  
1.44  
0.00

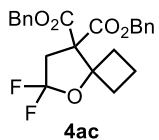

<sup>1</sup>H NMR (400 MHz, CDCl<sub>3</sub>)

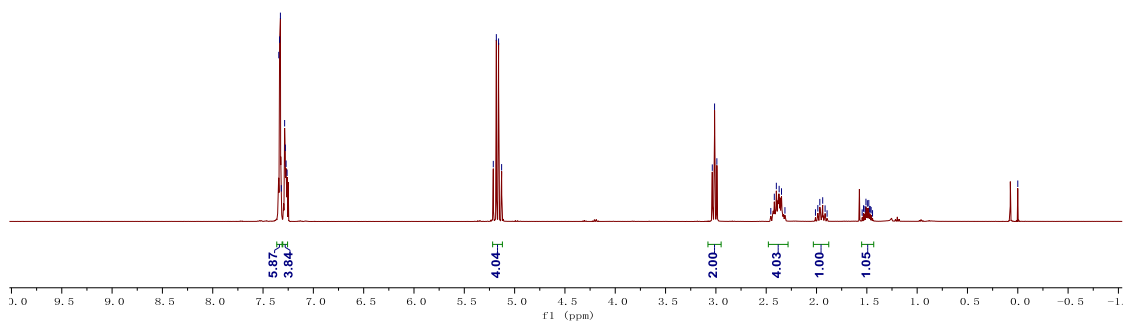

LHD-6009-2  
single\_pulse decoupled gated NOE

166.7

134.6  
131.8  
129.3  
128.7  
128.6  
128.4  
126.7

90.6

77.3 CDCl<sub>3</sub>  
77.0 CDCl<sub>3</sub>  
76.7 CDCl<sub>3</sub>

67.9  
63.6

41.1  
40.7  
40.4

31.4

14.1

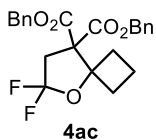

<sup>13</sup>C NMR (101 MHz, CDCl<sub>3</sub>)

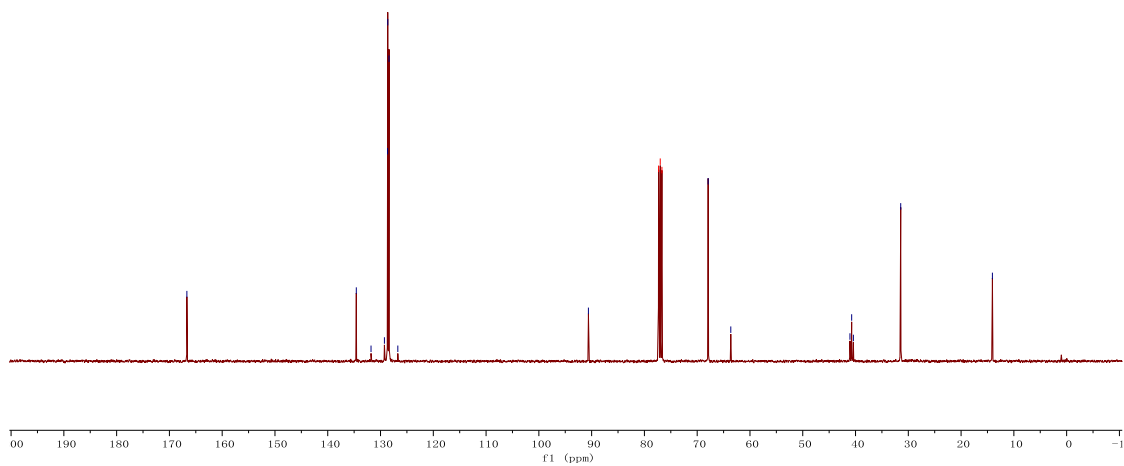



LHD-6009-2  
single\_pulse

61.98  
62.00  
62.03

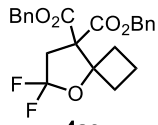

**4ac**

$^{19}\text{F}$  NMR (376 MHz,  $\text{CDCl}_3$ )

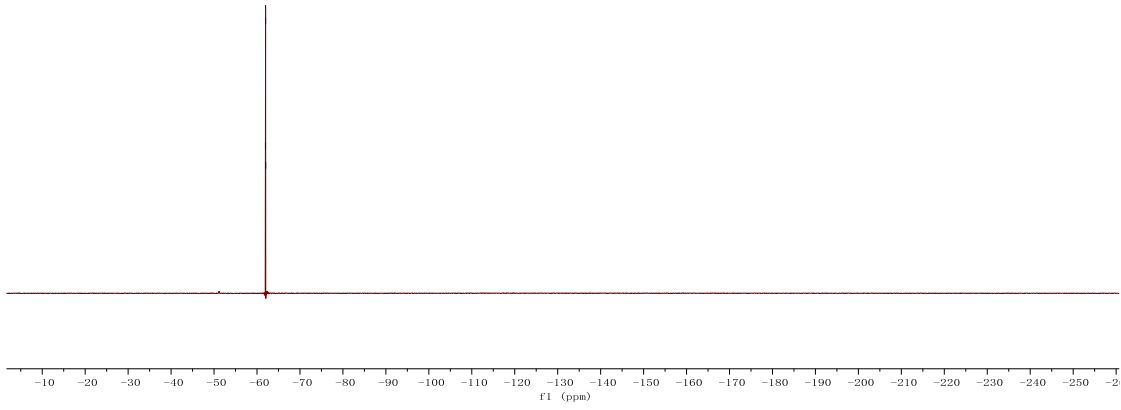

LHD-6003-2  
single\_pulse

7.34  
7.33  
7.32  
7.27  
7.25

5.19  
5.16  
5.14  
5.11

3.12  
3.09  
3.07  
2.06  
2.05  
2.02  
1.81  
1.79  
1.76  
1.72  
1.69  
1.55  
1.54  
1.52  
1.50

-0.00

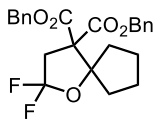

**4ad**

$^1\text{H}$  NMR (400 MHz,  $\text{CDCl}_3$ )

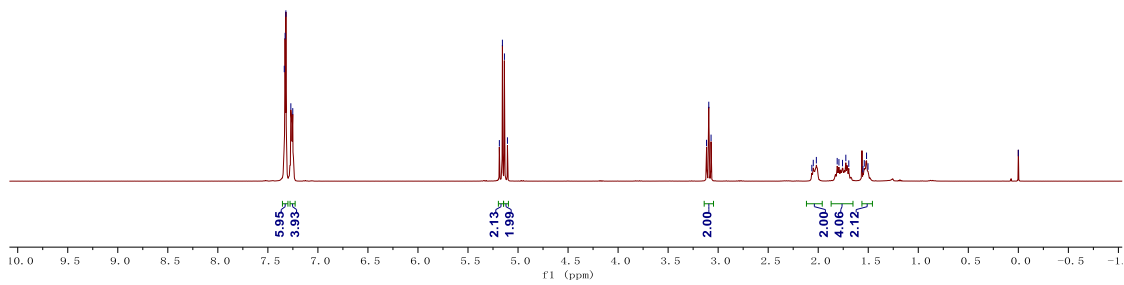

LHD-6003-2  
single pulse decoupled gated NOE

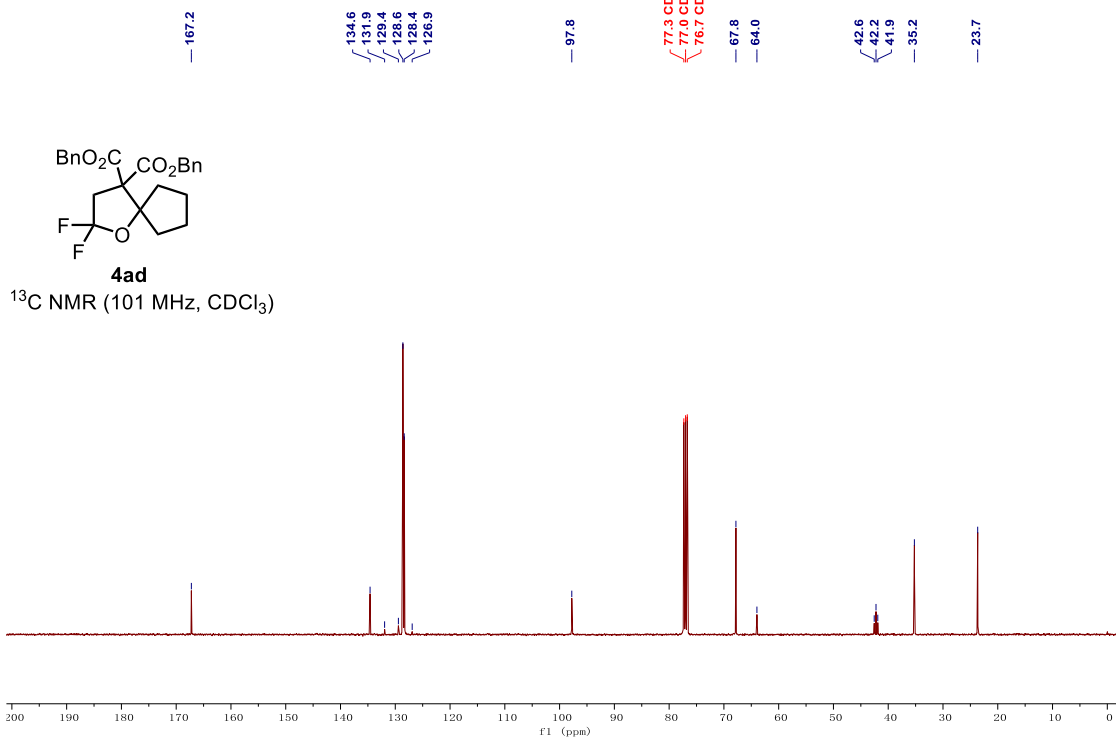

LHD-6003-2  
single\_pulse

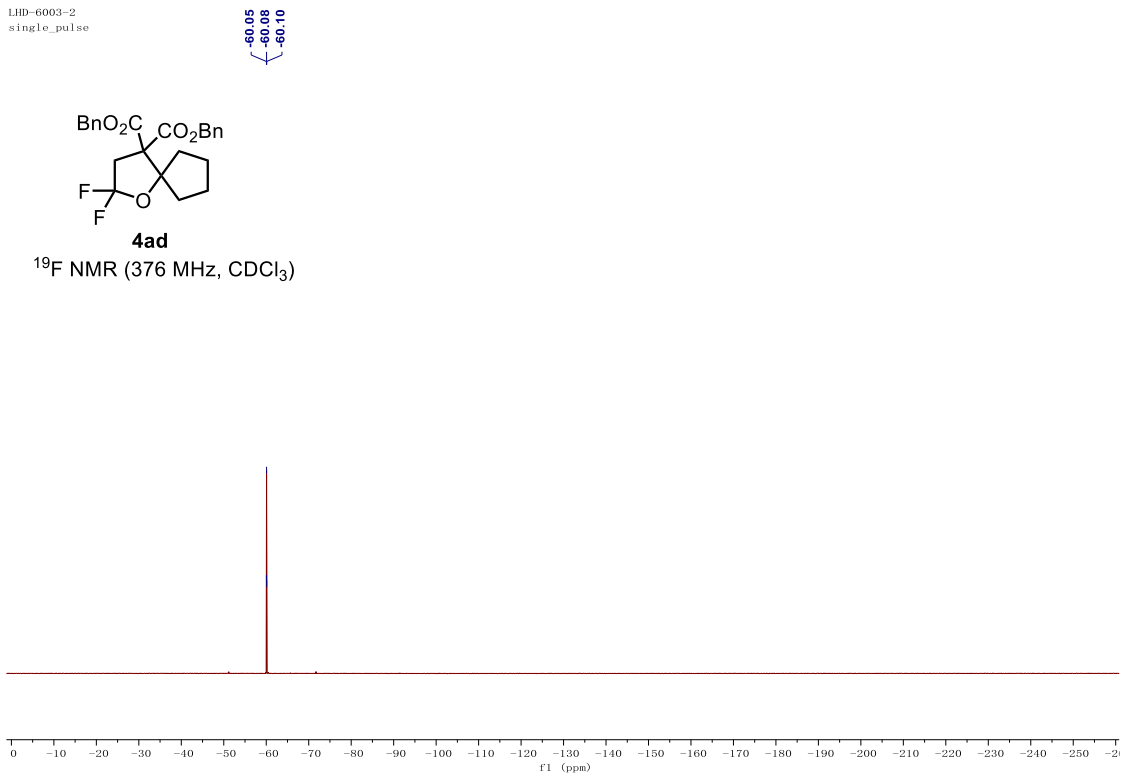

LHD-5185-2  
single\_pulse

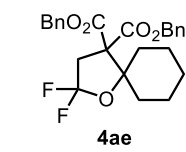

<sup>1</sup>H NMR (400 MHz, CDCl<sub>3</sub>)

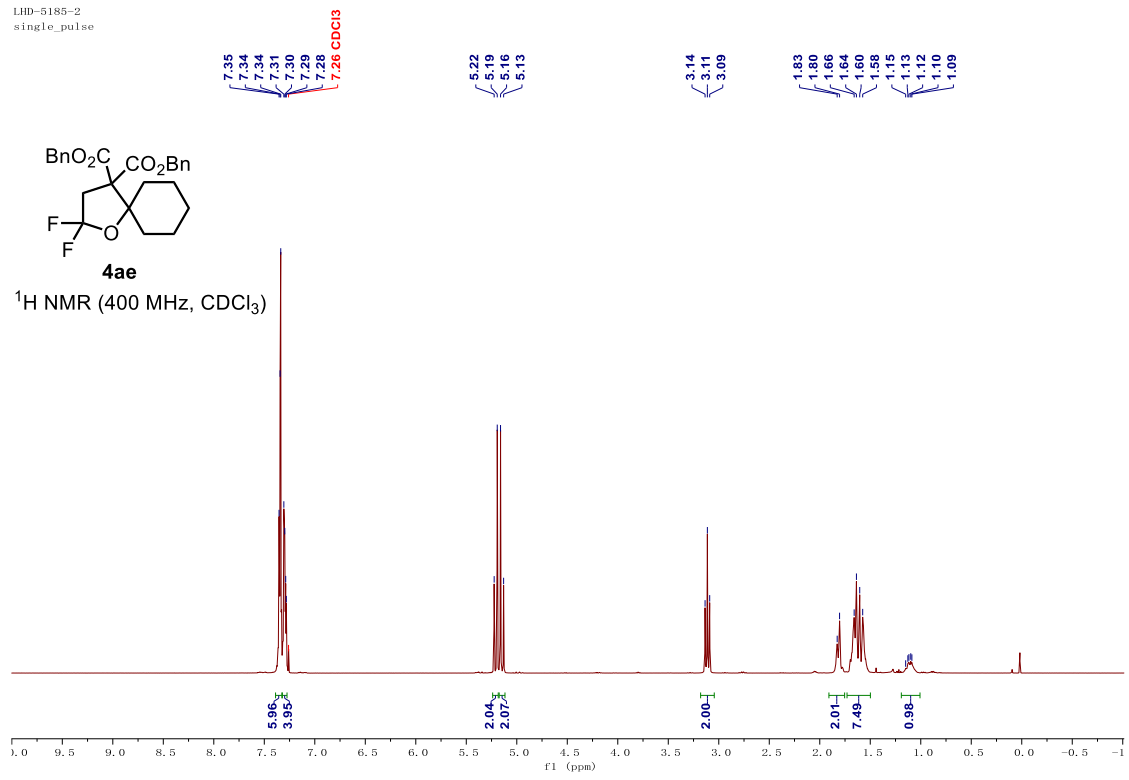

LHD-5185-2  
single\_pulse decoupled gated NOE

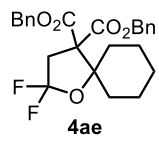

<sup>13</sup>C NMR (101 MHz, CDCl<sub>3</sub>)

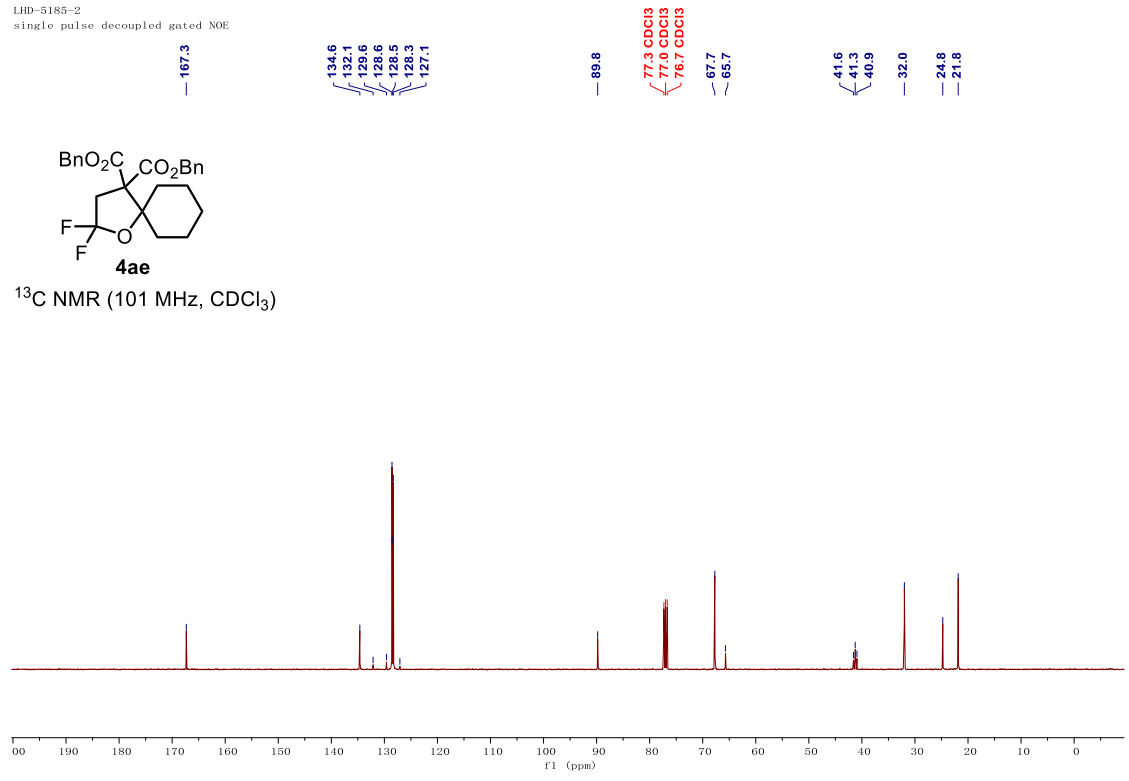

LHD-5185-2  
single\_pulse

-58.89  
-58.92  
-58.94

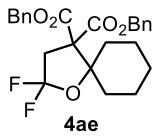

<sup>19</sup>F NMR (376 MHz, CDCl<sub>3</sub>)

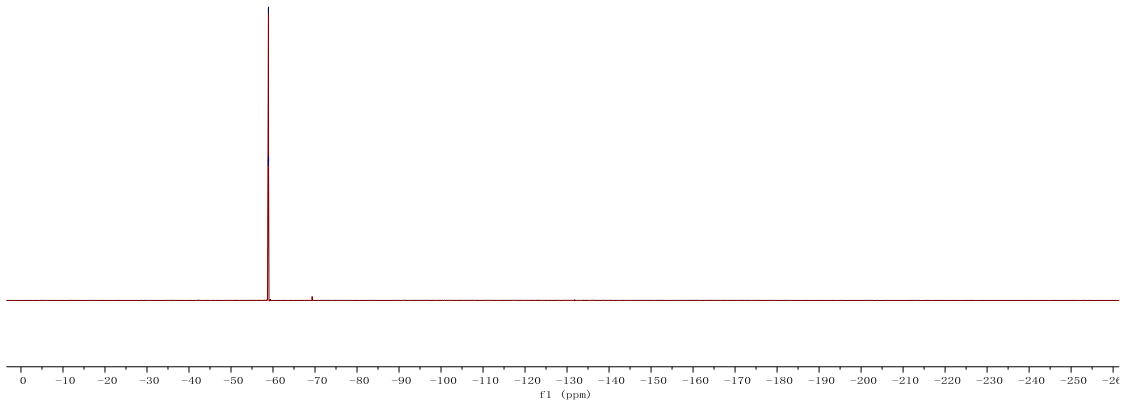

LHD-6029-2  
single\_pulse

7.35  
7.34  
7.33  
7.31  
7.30  
7.28 CDCl<sub>3</sub>

5.22  
5.19  
5.15  
5.12

3.13  
3.11  
3.09  
1.87  
1.86  
1.85  
1.67  
1.66  
1.65  
1.63  
1.60  
1.59  
1.52  
1.49  
1.47  
1.45  
1.43  
1.40  
1.38  
1.35  
1.34  
1.31  
1.30

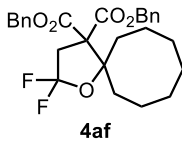

<sup>1</sup>H NMR (400 MHz, CDCl<sub>3</sub>)

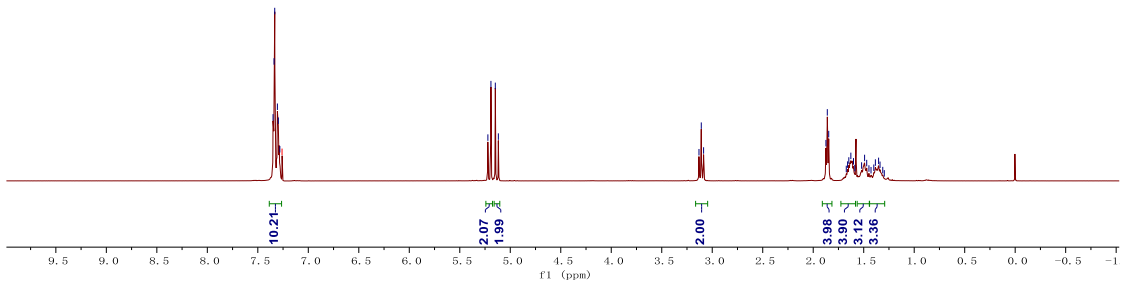

LHD-6029-2  
single pulse decoupled gated NOE

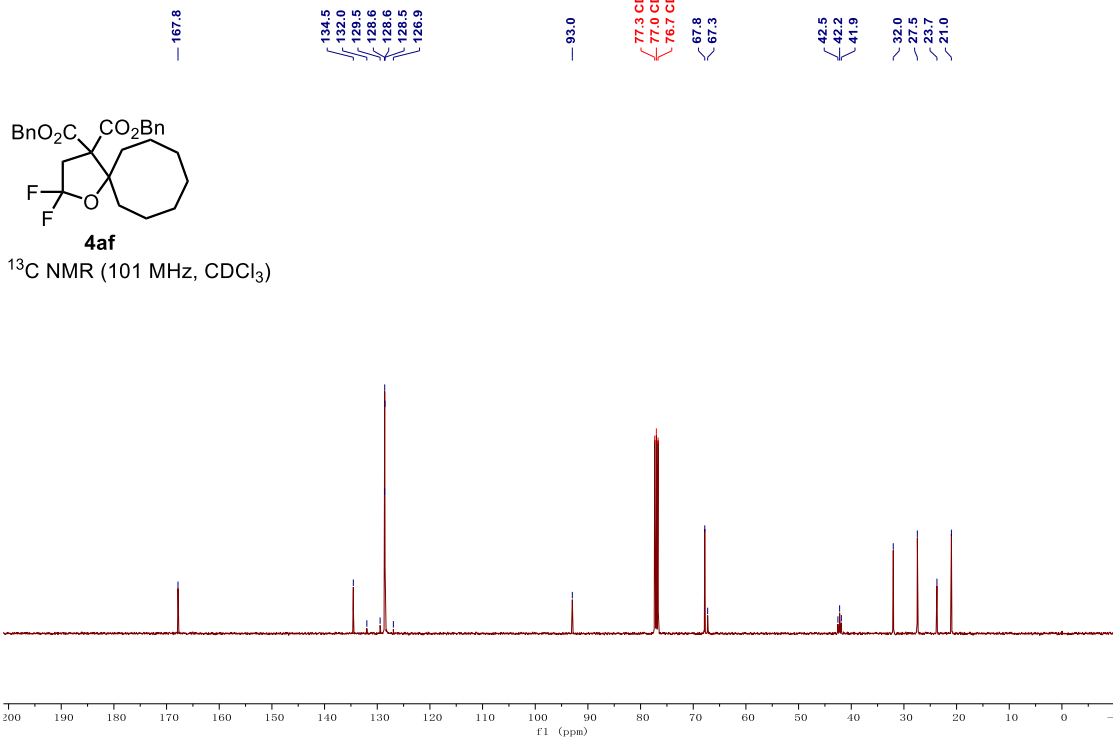

LHD-6029-2  
single\_pulse

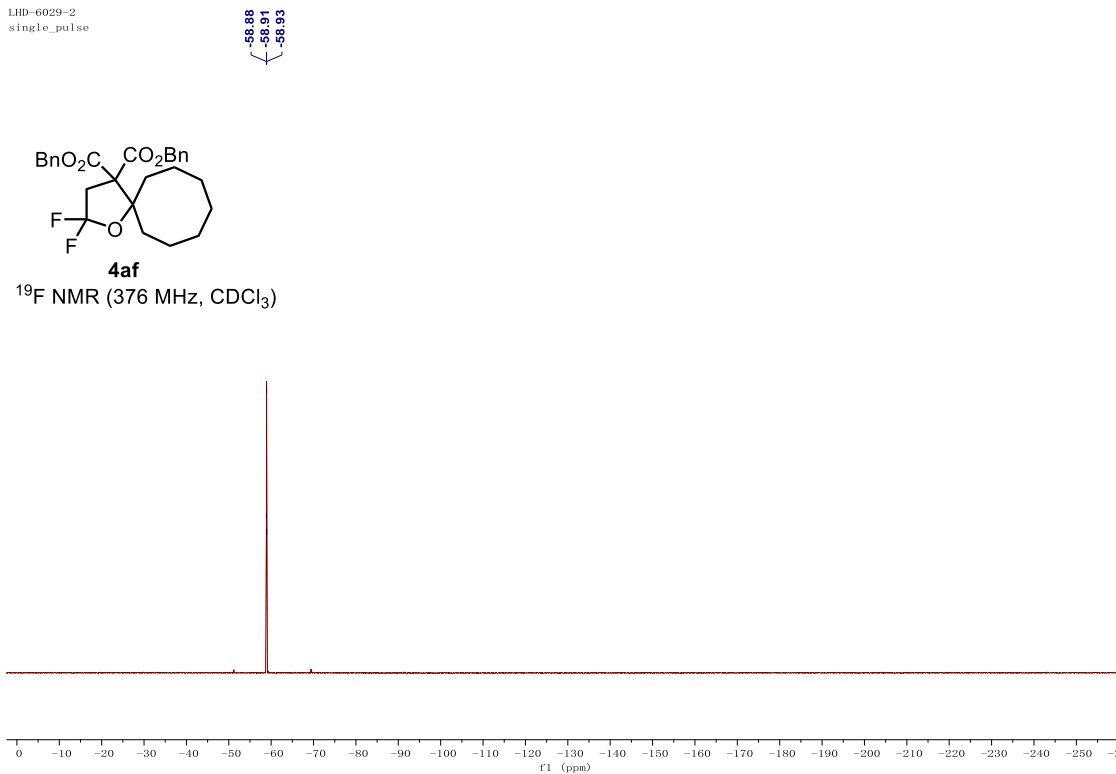

LHD-6097-1  
single\_pulse

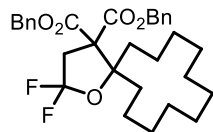

**4ag**

$^1\text{H}$  NMR (400 MHz,  $\text{CDCl}_3$ )

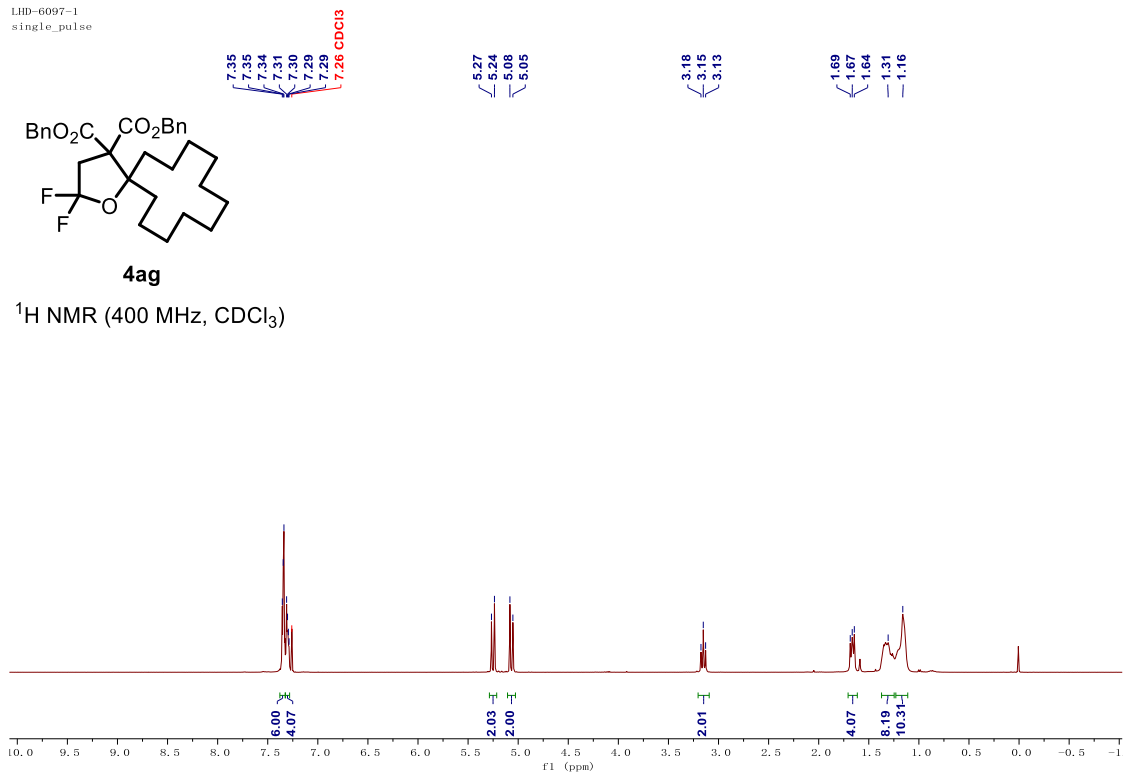

LHD-6097-1  
single\_pulse decoupled gated NOE

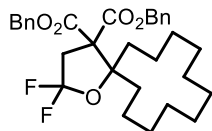

**4ag**

$^{13}\text{C}$  NMR (101 MHz,  $\text{CDCl}_3$ )

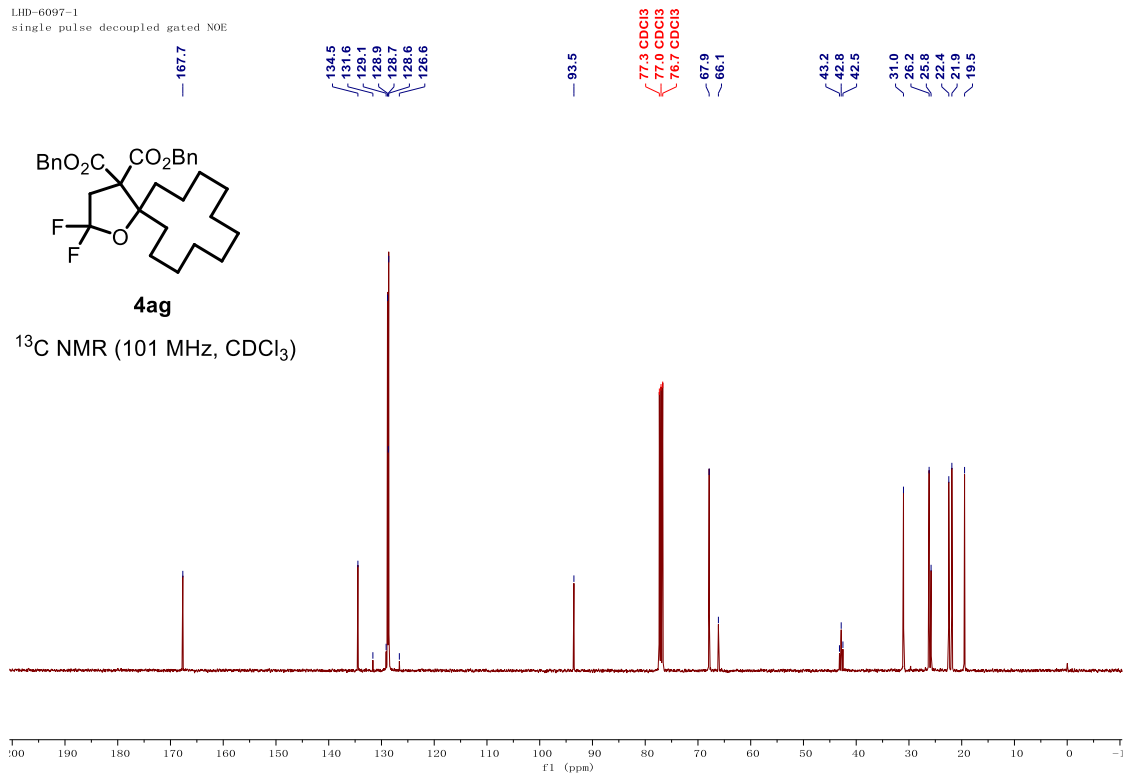

LHD-6097-1  
single\_pulse

— 59.79

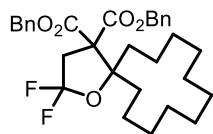

**4ag**

$^{19}\text{F}$  NMR (376 MHz,  $\text{CDCl}_3$ )

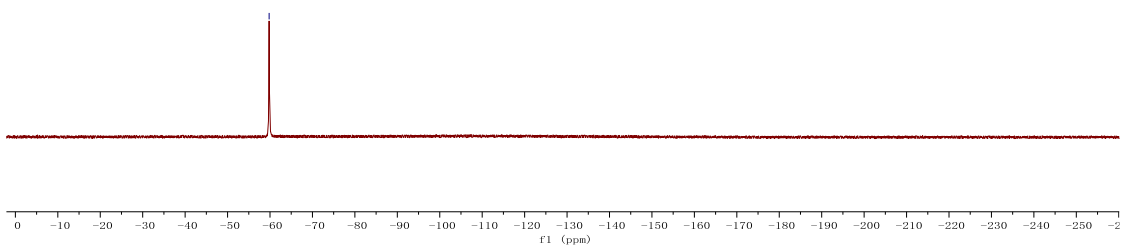

LHD-6021-4  
single\_pulse

7.34  
7.33  
7.32  
7.26  
7.25  
7.24  
7.23

— 5.11

3.41  
3.38  
3.36

— 2.61

2.28

2.25

1.78

1.76

1.64

1.60

1.57

1.54

— -0.00

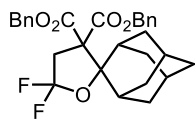

**4ah**

$^1\text{H}$  NMR (400 MHz,  $\text{CDCl}_3$ )

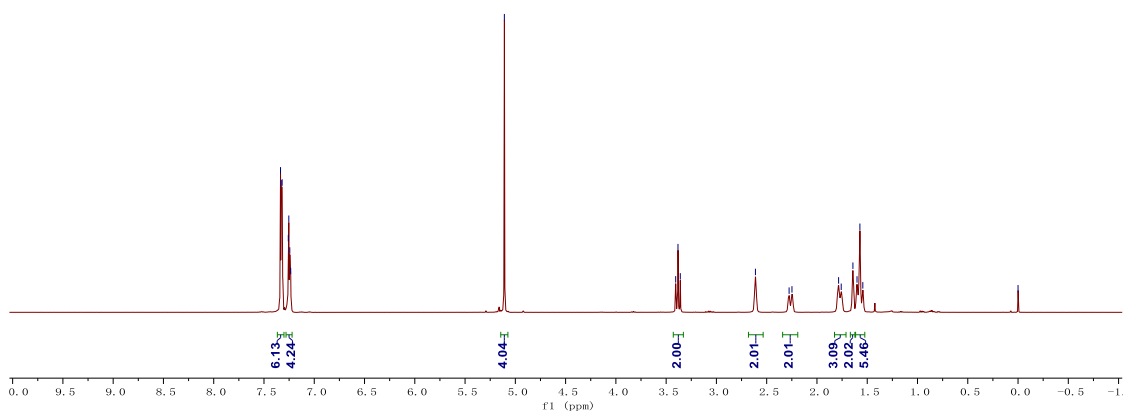

LHD-6021-4  
single pulse decoupled gated NOE

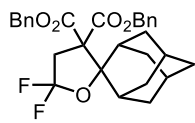

**4ah**

$^{13}\text{C}$  NMR (101 MHz,  $\text{CDCl}_3$ )

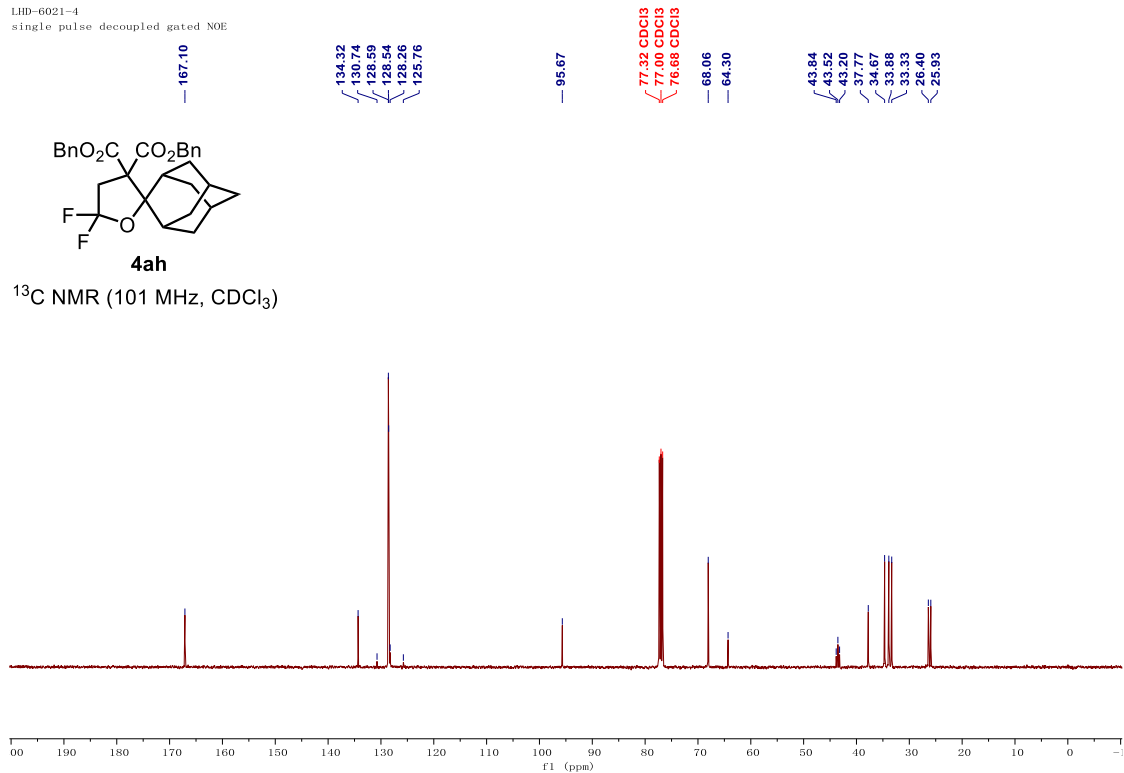

LHD-6021-4  
single\_pulse

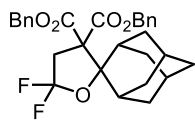

**4ah**

$^{19}\text{F}$  NMR (376 MHz,  $\text{CDCl}_3$ )

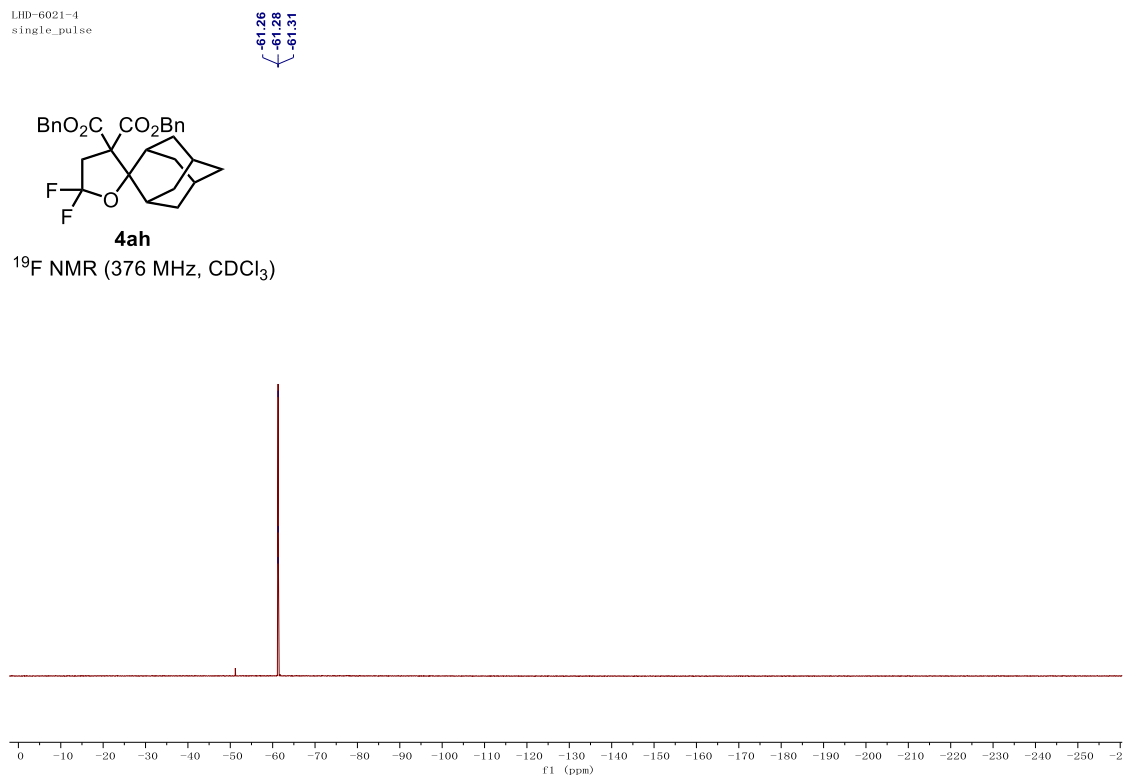



LHD-6091-1  
single\_pulse

7.34  
7.33  
7.33  
7.33  
7.28  
7.28  
7.25

5.21  
5.18  
5.13  
5.10

3.14  
3.12  
3.10

2.13  
2.10  
2.07  
1.99  
1.97  
1.92  
1.89

-0.00

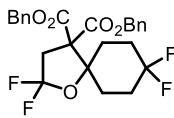

4ai

<sup>1</sup>H NMR (400 MHz, CDCl<sub>3</sub>)

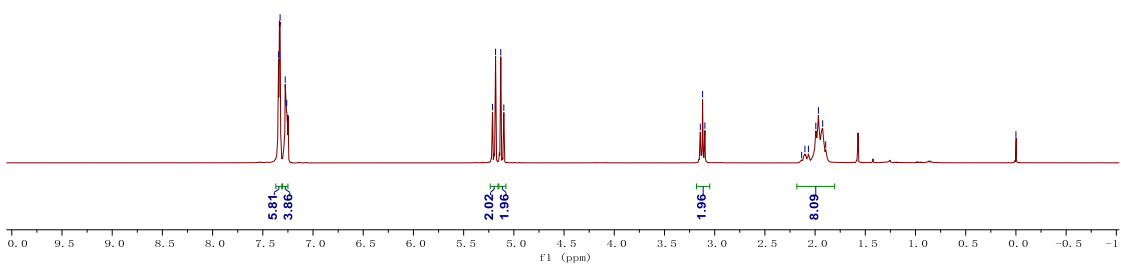

LHD-6091-1  
single\_pulse decoupled gated NOE

166.8

134.3  
132.0  
129.4  
128.7  
128.5  
126.9  
124.4  
122.0  
122.0  
119.6

87.2

77.3 CDCl<sub>3</sub>  
77.0 CDCl<sub>3</sub>  
76.7 CDCl<sub>3</sub>

68.1  
64.6

41.7  
41.3  
41.0  
28.9  
28.7  
28.4  
28.7  
26.6

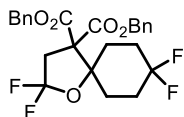

4ai

<sup>13</sup>C NMR (101 MHz, CDCl<sub>3</sub>)

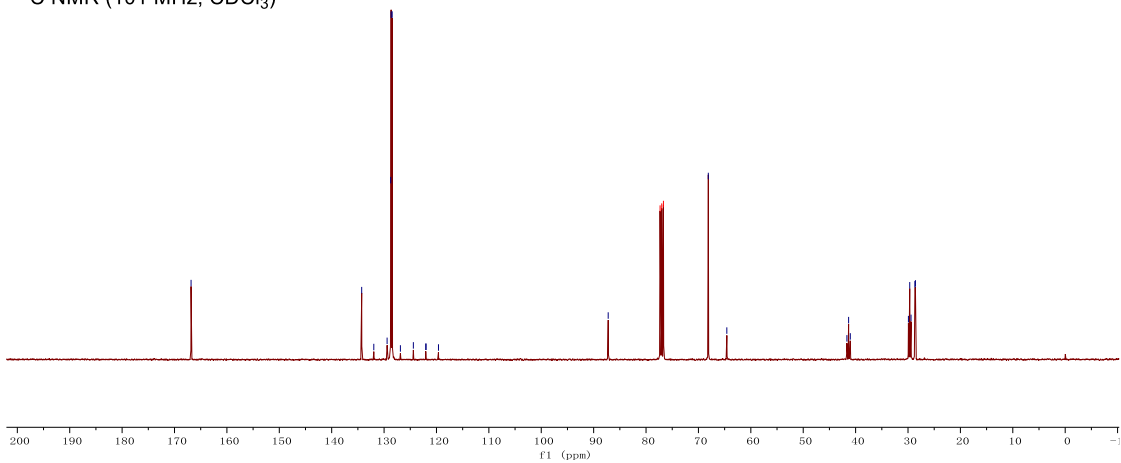

LHD-6091-1  
single\_pulse

59.61  
59.64  
59.66

93.20  
93.83  
103.42  
103.44  
103.50  
103.53  
103.62  
104.04  
104.07  
104.13  
104.16  
104.23  
104.25

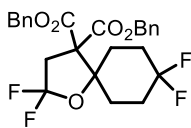

4ai

<sup>19</sup>F NMR (376 MHz, CDCl<sub>3</sub>)

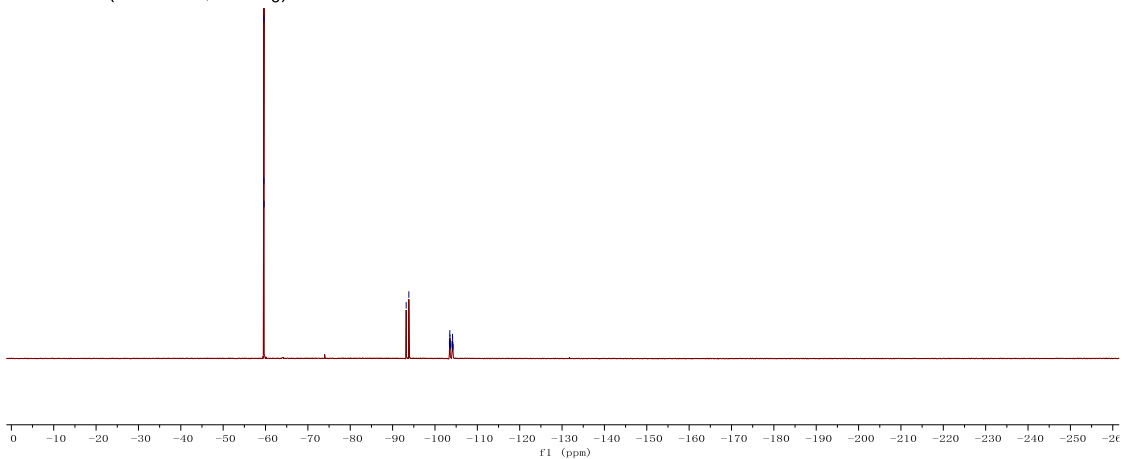

LHD-7081-2-2  
single\_pulse

7.36  
7.35  
7.34  
7.33  
7.30  
7.29  
7.28  
7.27

5.22  
5.19  
5.13  
5.10

3.33  
3.31  
3.30  
3.17  
3.14  
3.12

1.89  
1.87  
1.83  
1.81  
1.79  
1.75

-0.00

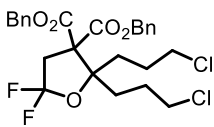

4aj

<sup>1</sup>H NMR (400 MHz, CDCl<sub>3</sub>)

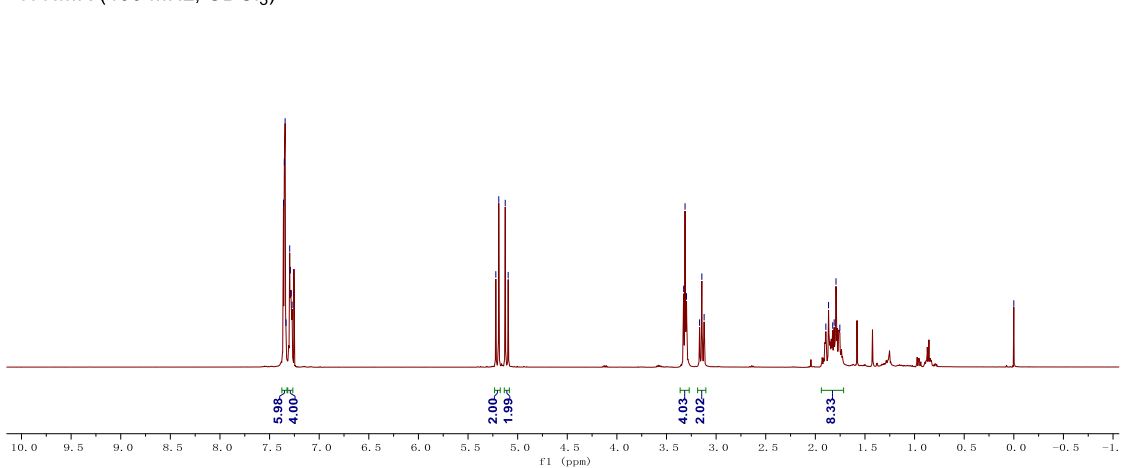

LHD-7081-2-2  
single pulse decoupled gated NOE

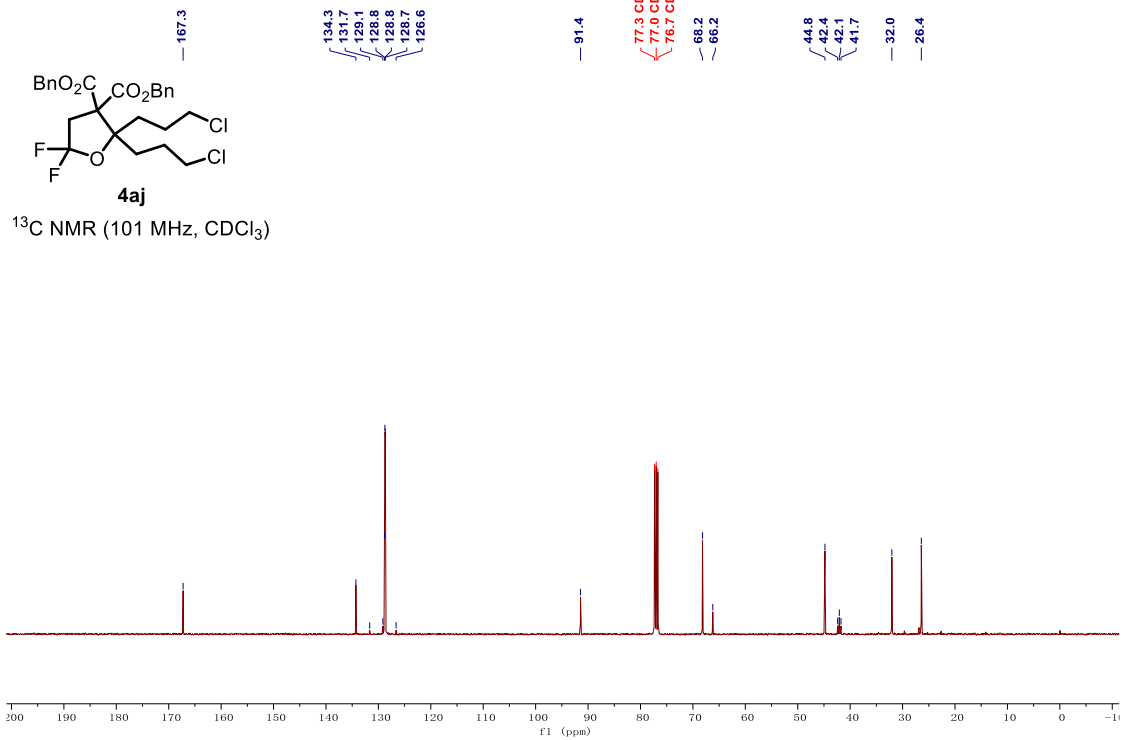

LHD-7081-2-2  
single\_pulse

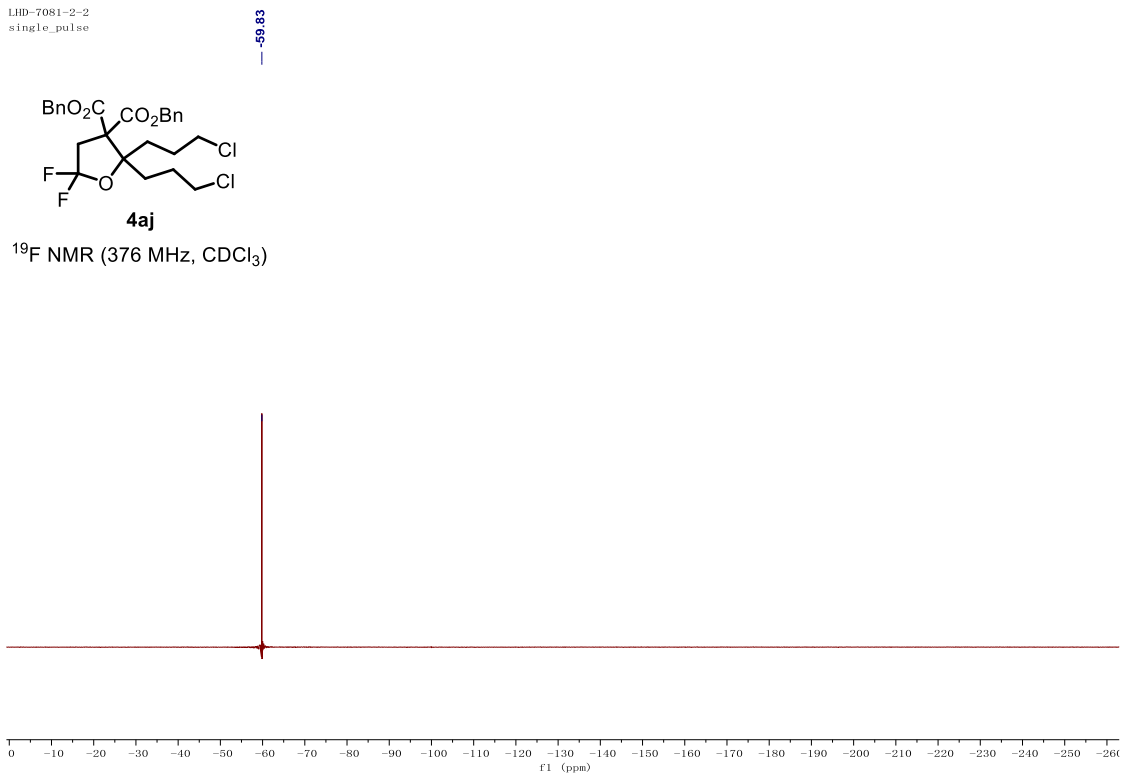

LHD-6029-1-2  
single\_pulse

7.61  
7.60  
7.59  
7.58  
7.32  
7.31  
7.29  
7.26  
7.25  
7.21  
7.19  
6.94  
6.92  
5.20  
5.17  
5.14  
5.11  
4.65  
4.62  
4.30  
4.27  
3.61  
3.60  
3.58  
3.57  
3.56  
3.54  
3.39  
3.38  
3.37  
3.35  
3.34  
3.33  
3.31  
3.21  
3.18  
3.15  
3.14  
3.11  
3.10  
3.06  
3.05  
3.03  
3.02  
3.01  
3.00  
2.96  
2.46  
2.43  
2.42  
2.40  
2.39

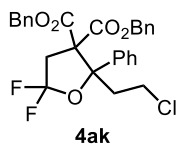

<sup>1</sup>H NMR (400 MHz, CDCl<sub>3</sub>)

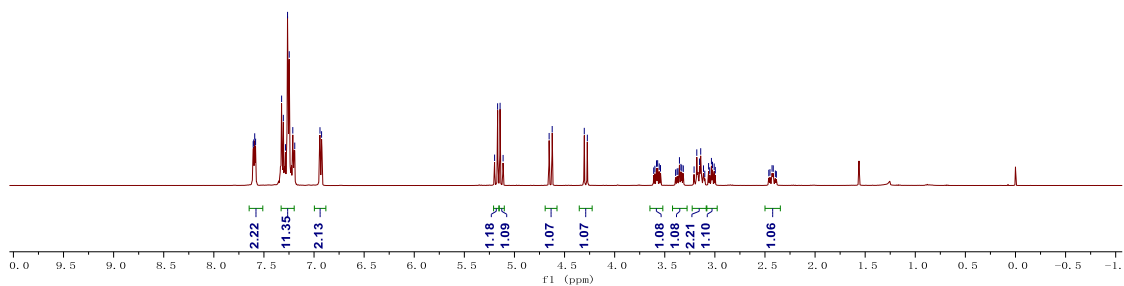

LHD-6029-1-2  
single\_pulse decoupled gated NOE

167.0  
166.3  
136.0  
134.2  
134.0  
131.8  
129.3  
128.8  
128.7  
128.6  
128.5  
128.4  
128.2  
128.2  
126.8  
126.1  
-91.7  
77.3 CDCl3  
77.0 CDCl3  
76.7 CDCl3  
68.2  
67.9  
67.4  
42.1  
41.8  
41.7  
41.4  
40.4  
39.0

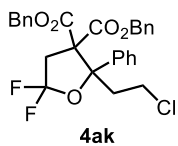

<sup>13</sup>C NMR (101 MHz, CDCl<sub>3</sub>)

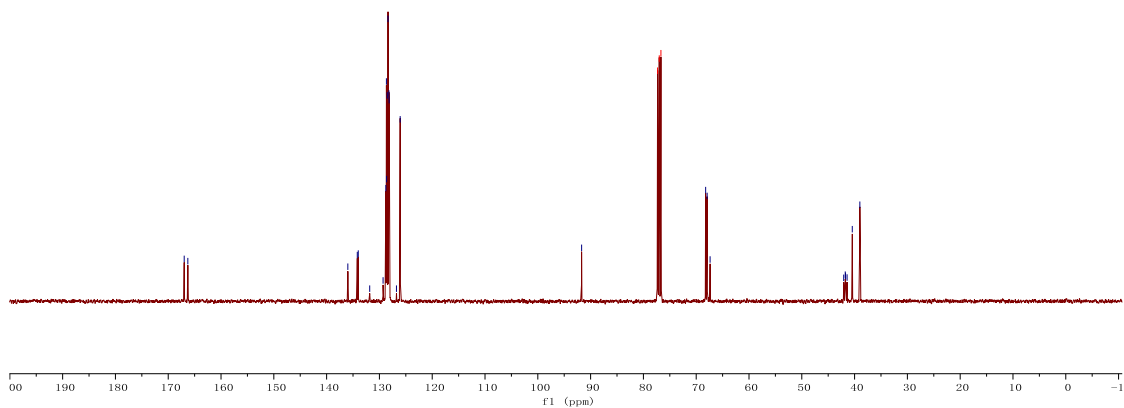

LHD-6029-1-2  
single\_pulse

54.18  
54.20  
54.21  
54.23  
54.57  
54.60  
54.62  
54.95  
64.98  
65.01  
65.34  
65.37

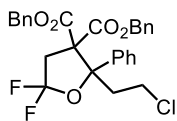

**4ak**

<sup>19</sup>F NMR (376 MHz, CDCl<sub>3</sub>)

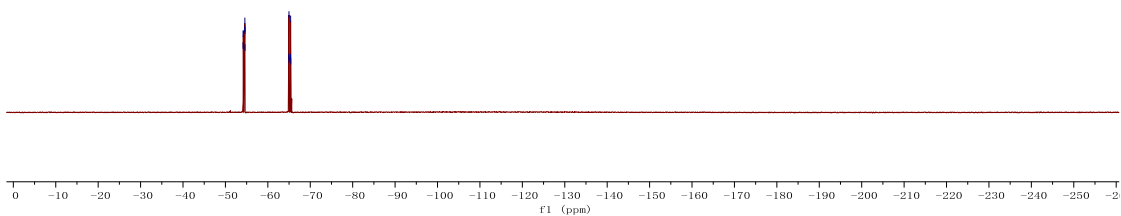

7.93  
7.92  
7.91  
7.90  
7.88  
7.27  
7.25  
7.23  
7.21  
7.18  
7.16  
7.14  
7.12  
7.11  
7.00  
6.88  
6.86  
6.84  
5.32  
5.29  
5.17  
5.13  
4.78  
4.75  
4.36  
4.32  
3.74  
3.73  
3.72  
3.71  
3.70  
3.69  
3.67  
3.28  
3.28  
3.26  
3.25  
3.24  
3.24  
3.22  
3.21  
2.65  
2.64  
2.63  
2.61  
2.60  
2.36  
2.35  
2.34  
2.32  
2.31  
2.28  
2.26  
2.25  
2.20  
2.20  
2.18  
2.17  
2.17  
2.15  
1.86  
1.84  
1.83  
1.82  
1.81  
1.71  
1.70  
1.69  
1.68  
1.67

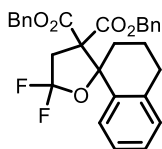

**4al**

<sup>1</sup>H NMR (400 MHz, CDCl<sub>3</sub>)

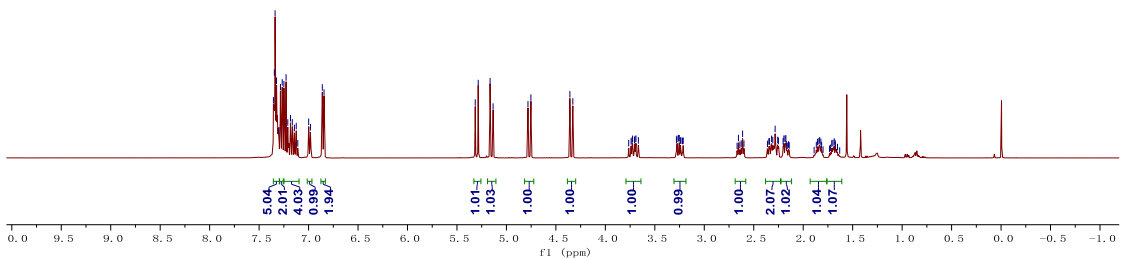

LHD-6025-3  
single pulse decoupled gated NOE

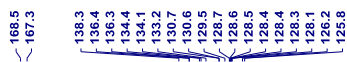

90.5

77.3 CDCl3  
77.0 CDCl3  
76.7 CDCl3

68.1  
68.0  
68.0

43.7  
43.4  
43.1

34.4  
29.3

19.2

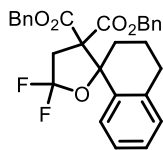

4al

<sup>13</sup>C NMR (101 MHz, CDCl<sub>3</sub>)

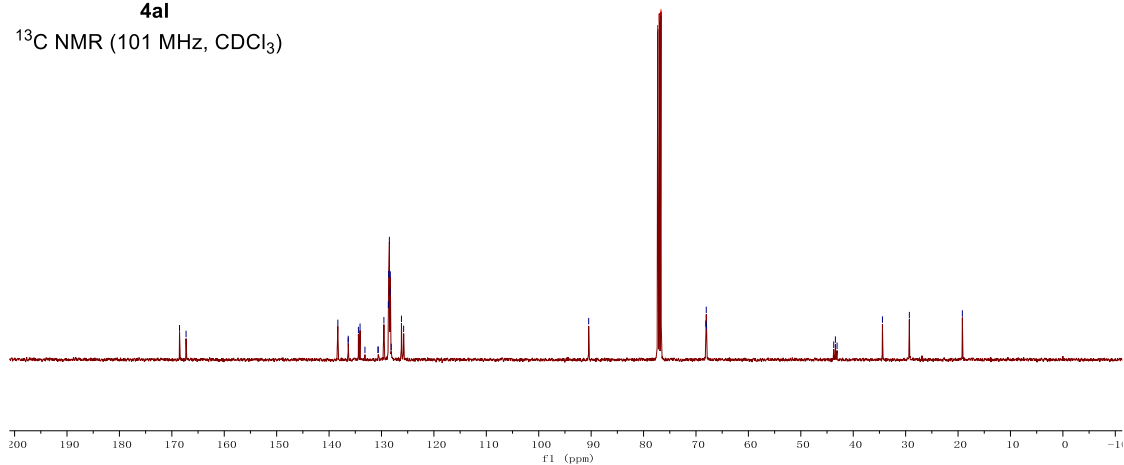

LHD-6025-3  
single\_pulse

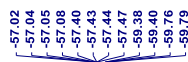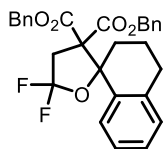

4al

<sup>19</sup>F NMR (376 MHz, CDCl<sub>3</sub>)

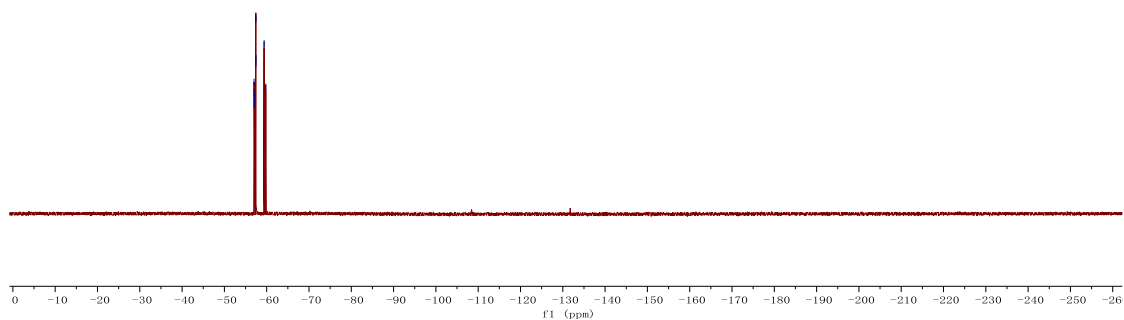

LHD-5185-1-3  
single\_pulse

7.61  
7.60  
7.60  
7.59  
7.31  
7.30  
7.26  
7.24  
7.22  
7.19  
6.95  
6.95  
6.93  
6.93

5.19  
5.16  
5.13  
5.10  
4.69  
4.37  
4.34

3.37  
3.36  
3.35  
3.33  
3.32  
3.31  
3.29  
3.29  
3.18  
3.17  
3.16  
3.13

1.88

-0.00

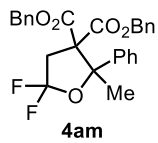

<sup>1</sup>H NMR (400 MHz, CDCl<sub>3</sub>)

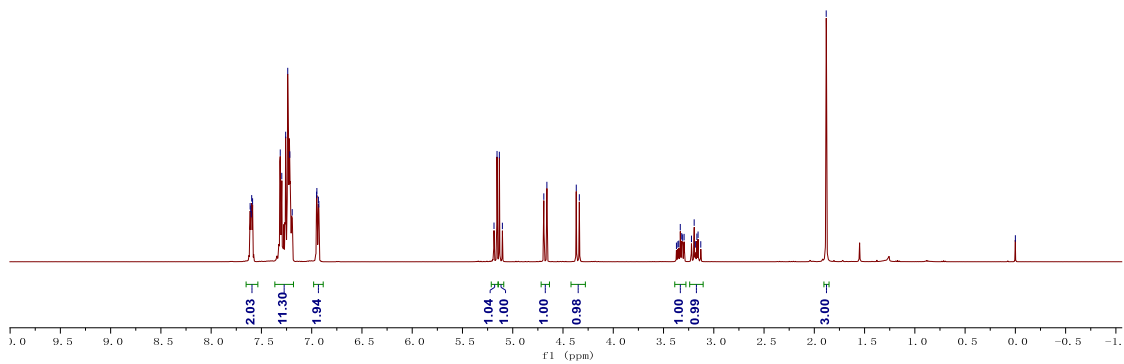

LHD-5185-1-3  
single\_pulse decoupled gated NOE

167.5  
166.9

139.5  
134.4  
134.2  
131.9  
129.4  
128.7  
128.6  
128.5  
128.3  
128.1  
127.8  
126.9  
125.8

91.0

77.3 CDCl3  
77.0 CDCl3  
76.7 CDCl3

68.0  
67.8  
67.2

42.3  
42.0  
41.9  
41.6

26.1

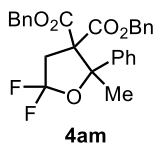

<sup>13</sup>C NMR (101 MHz, CDCl<sub>3</sub>)

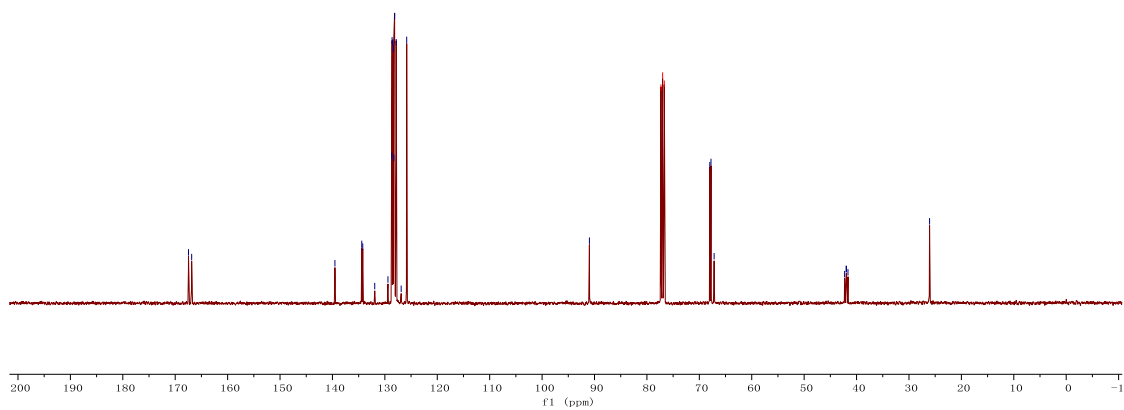

LHD-5185-1  
single\_pulse

53.53  
53.56  
53.56  
53.92  
53.93  
53.95  
64.24  
64.27  
64.30  
64.63  
64.66  
64.69

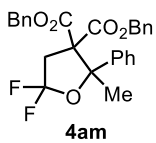

<sup>19</sup>F NMR (376 MHz, CDCl<sub>3</sub>)

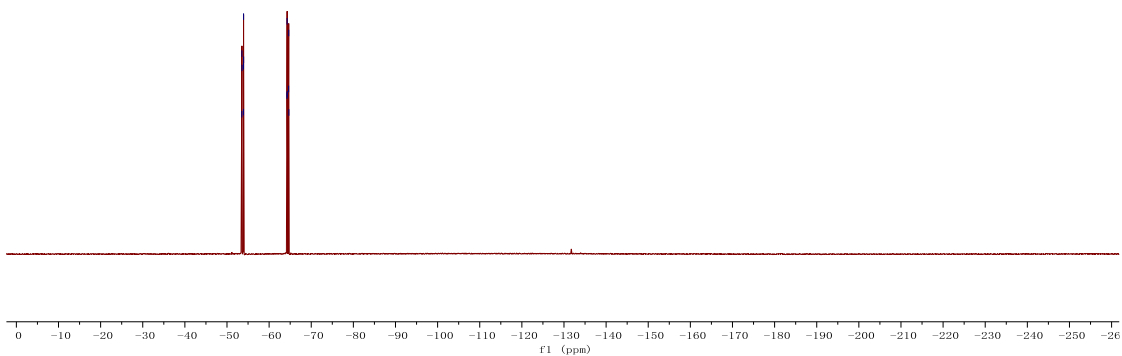

LHD-6007-7  
single\_pulse

7.44  
7.43  
7.42  
7.31  
7.30  
7.28  
7.22  
7.20  
7.18  
7.06  
7.04  
7.04

4.86  
4.83  
4.81  
4.78

3.42  
3.40  
3.38

0.00

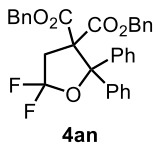

<sup>1</sup>H NMR (400 MHz, CDCl<sub>3</sub>)

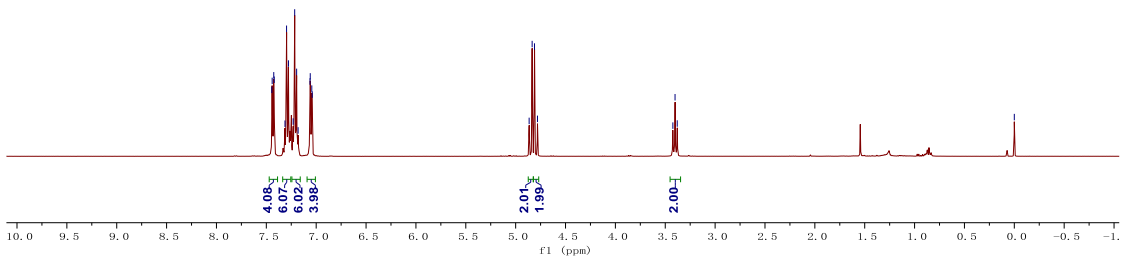



LHD-6007-7  
single pulse decoupled gated NOE

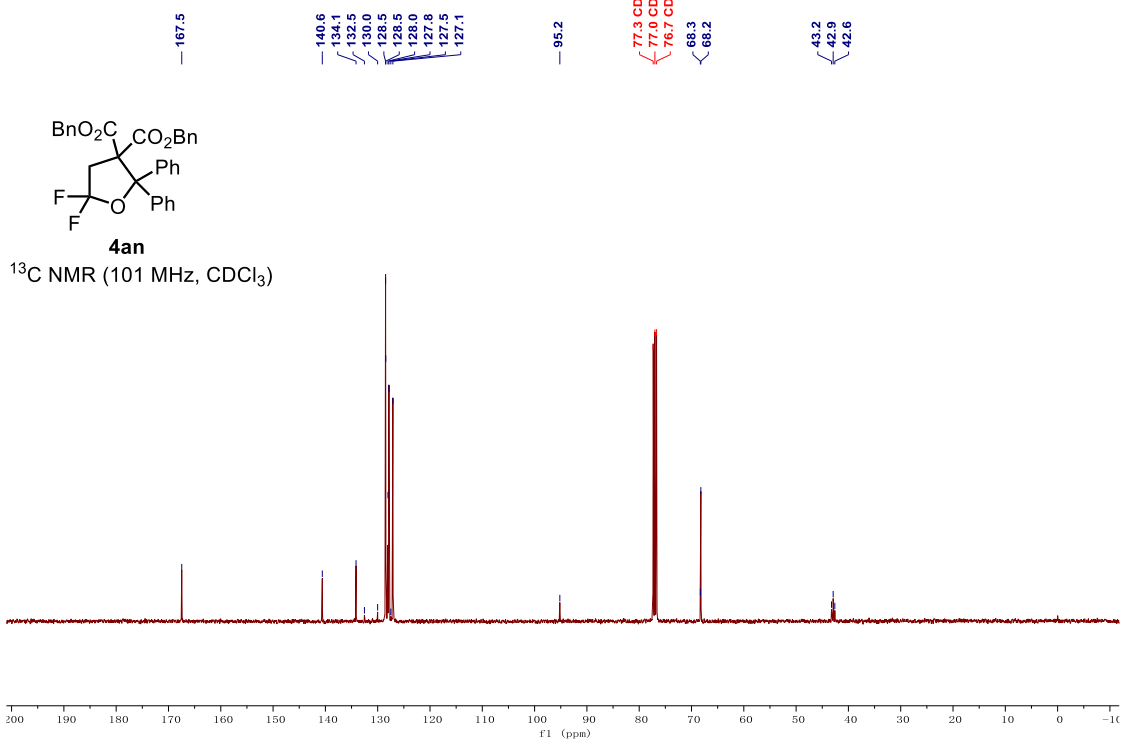

LHD-6007-7  
single\_pulse

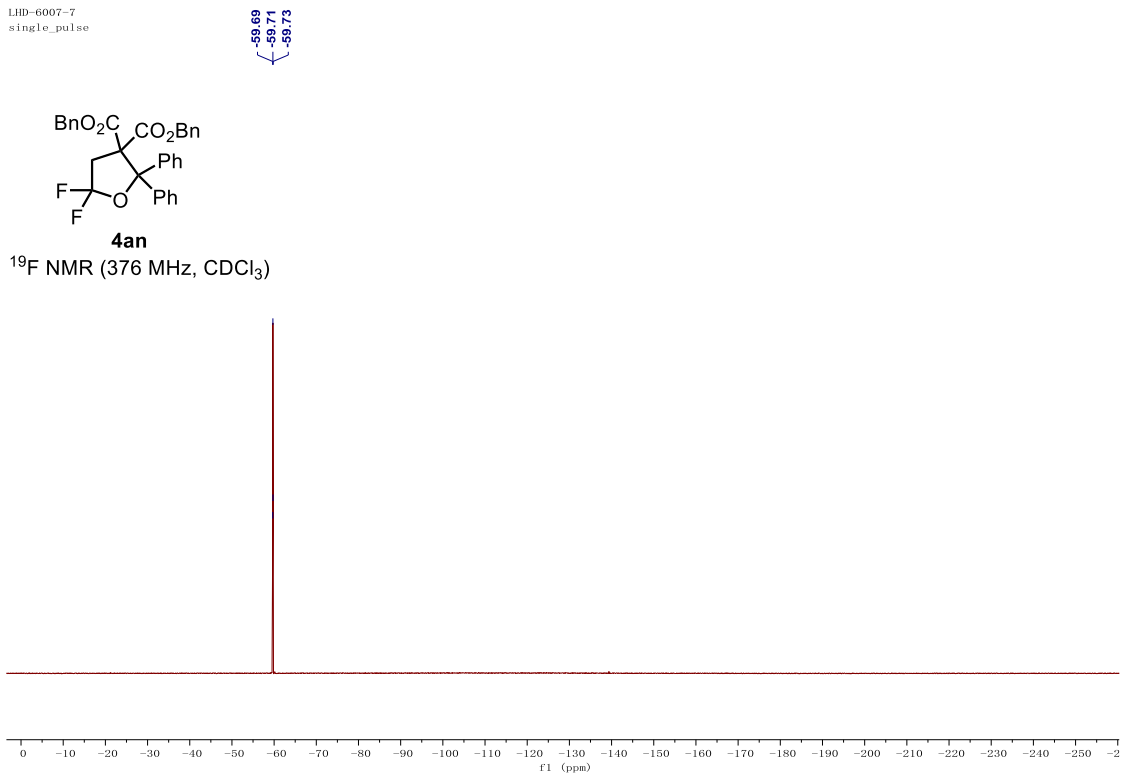

LHD-6019-3  
single\_pulse

7.70  
7.70  
7.69  
7.68  
7.68  
7.32  
7.30  
7.28  
7.27  
7.25  
7.24  
7.22  
7.01  
7.01  
6.99  
6.83  
5.24  
5.21  
5.14  
5.11  
4.73  
4.70  
4.52  
4.49  
3.28  
3.26  
3.25  
3.24  
3.24  
3.23  
3.22  
3.22  
3.19  
3.15

0.00

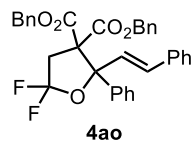

<sup>1</sup>H NMR (400 MHz, CDCl<sub>3</sub>)

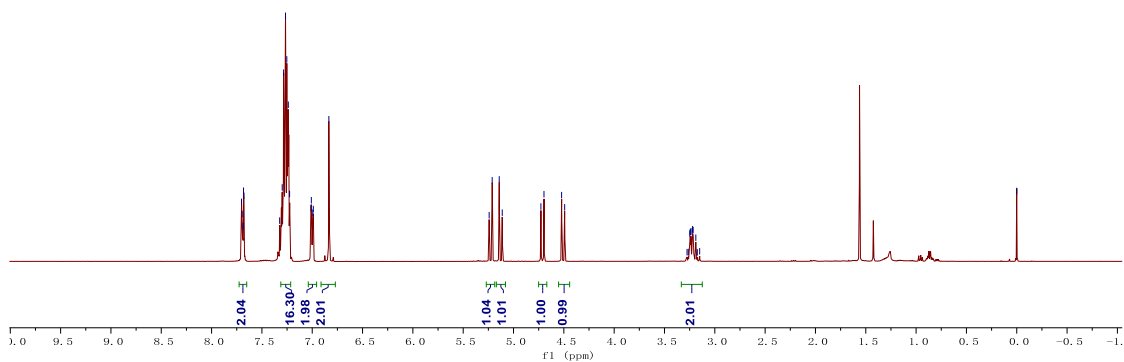

LHD-6019-3  
single\_pulse decoupled gated NOE

167.2  
166.7  
138.9  
138.8  
136.0  
134.4  
134.2  
132.2  
131.4  
129.7  
128.7  
128.7  
128.6  
128.5  
128.4  
128.4  
128.2  
128.1  
128.1  
128.0  
127.8  
127.8  
126.9  
126.0  
92.2  
77.3 CDCl3  
77.0 CDCl3  
76.7 CDCl3  
68.2  
67.9  
41.4  
41.1  
41.1  
40.8

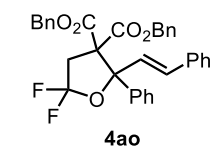

<sup>13</sup>C NMR (101 MHz, CDCl<sub>3</sub>)

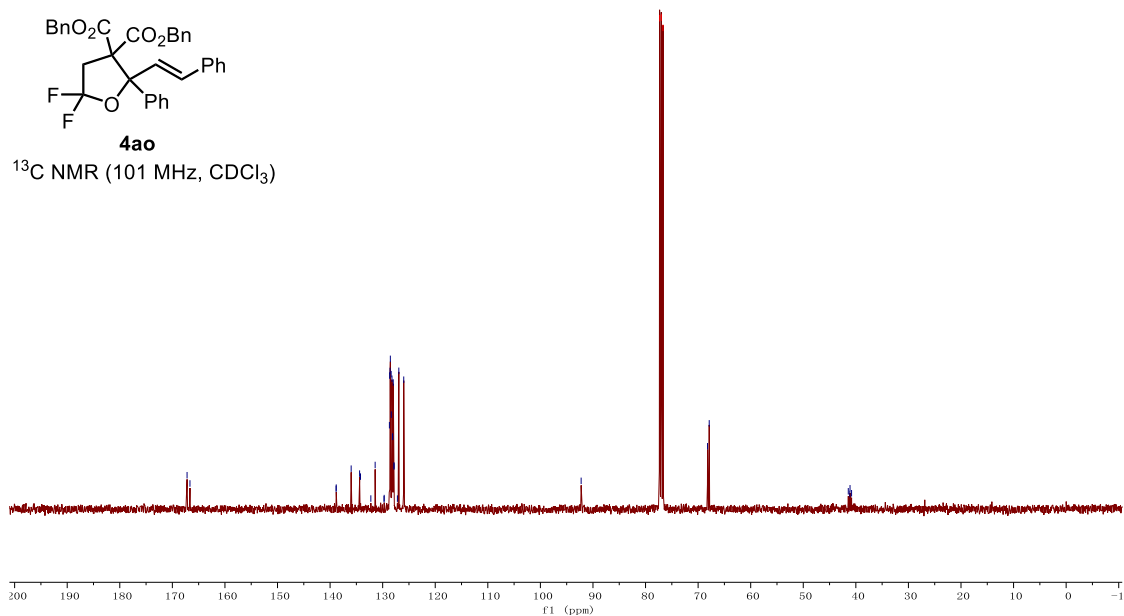

LHD-6019-3  
single\_pulse

57.35  
57.37  
57.72  
57.75  
60.97  
61.00  
61.03  
61.36  
61.41

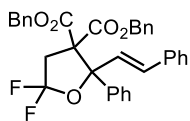

**4ao**

<sup>19</sup>F NMR (376 MHz, CDCl<sub>3</sub>)

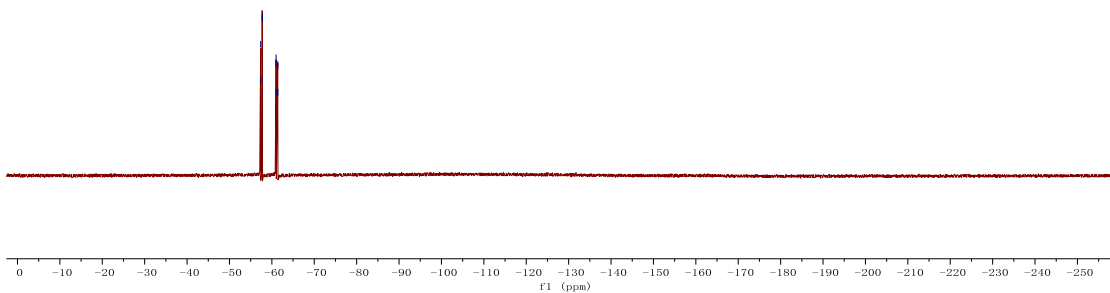

LHD-6003-6  
single\_pulse

7.35  
7.34  
7.33  
7.32  
7.29  
7.27  
7.25  
5.80  
5.77  
5.76  
5.73  
5.18  
5.16  
5.13  
5.13  
5.10  
5.08  
5.05  
3.11  
3.11  
3.09  
3.07  
3.07  
3.06  
1.86  
1.84  
1.82  
1.80  
1.79  
1.77  
1.75  
1.74  
1.72  
1.70  
0.86  
0.84  
0.82  
-0.00

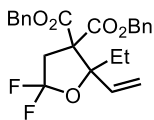

**4ap**

<sup>1</sup>H NMR (400 MHz, CDCl<sub>3</sub>)

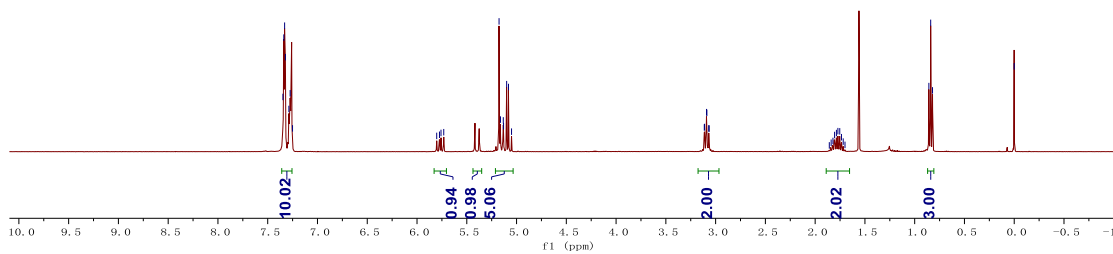

LHD-6003-6  
single pulse decoupled gated NOE

167.3  
167.0  
134.6  
134.6  
134.0  
134.0  
129.7  
128.6  
128.5  
128.4  
128.4  
127.2  
117.5

91.9

77.3 CDCl3  
77.0 CDCl3  
76.7 CDCl3

67.9  
66.3

41.1  
40.8  
40.8  
40.5

28.1

7.5

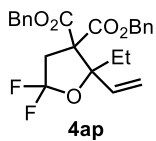

<sup>13</sup>C NMR (101 MHz, CDCl<sub>3</sub>)

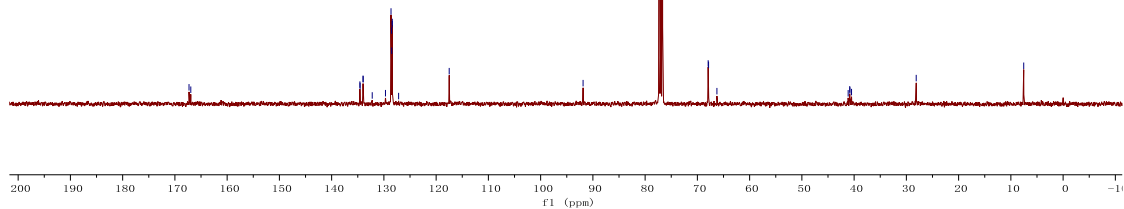

LHD-6003-6  
single\_pulse

-56.21  
-56.23  
-56.26  
-56.60  
-56.62  
-56.65  
-62.71  
-62.73  
-62.75  
-63.09  
-63.12  
-63.14

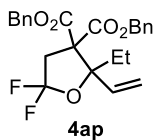

<sup>19</sup>F NMR (376 MHz, CDCl<sub>3</sub>)

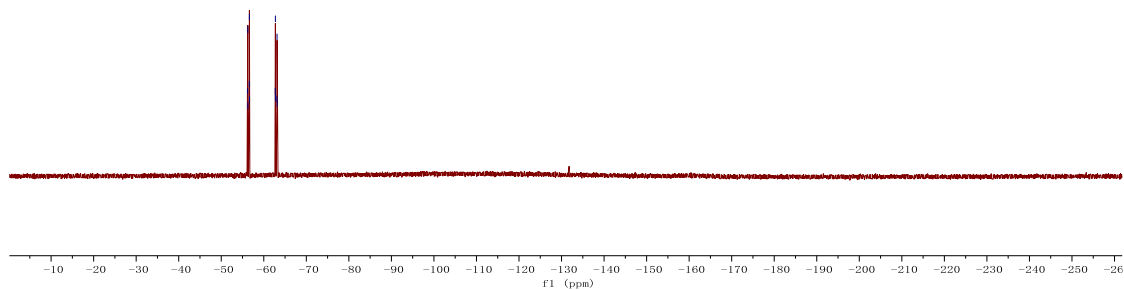

LHD-6017-6  
single\_pulse

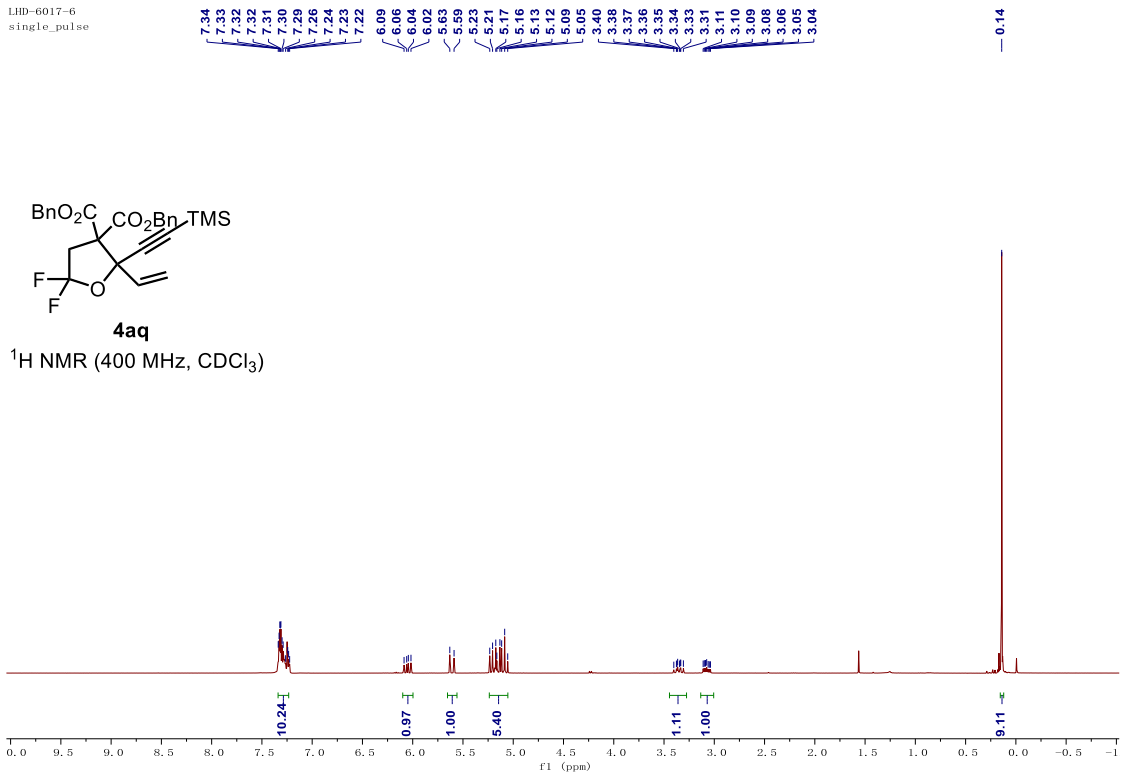

LHD-6017-6  
single\_pulse decoupled gated NOE

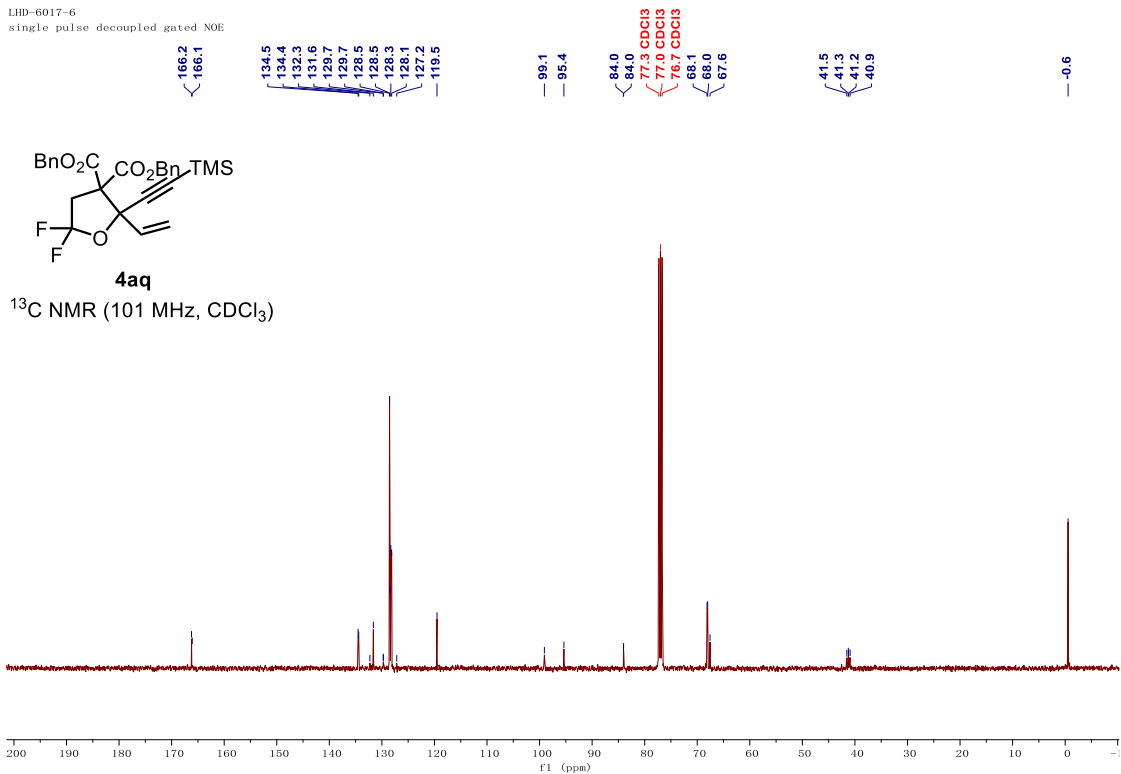

LHD-6017-6  
single\_pulse

58.56  
58.55  
58.56  
58.60  
58.93  
58.95  
58.96  
58.97  
61.98  
62.00  
62.01  
62.04  
62.36  
62.38  
62.39  
62.41

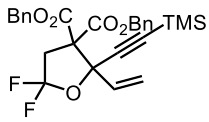

**4aq**

$^{19}\text{F}$  NMR (376 MHz,  $\text{CDCl}_3$ )

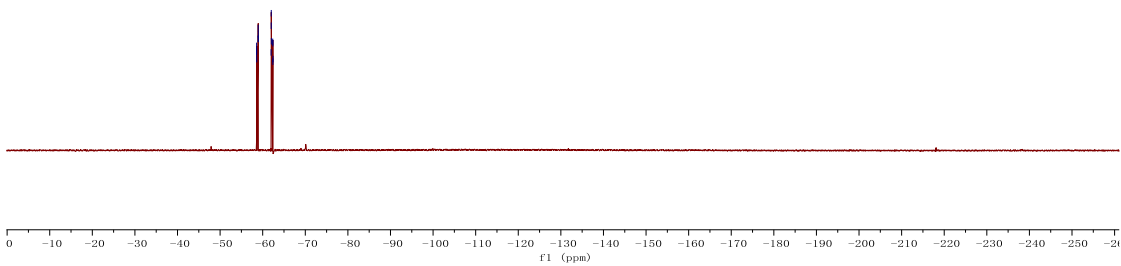

LHD-6013-3  
single\_pulse

7.97  
7.96  
7.95  
7.93  
7.92  
7.92  
7.25  
7.24  
7.19  
7.06  
7.04  
5.22  
5.20  
5.19  
5.18  
5.17  
5.15  
5.11  
5.08  
3.41  
3.38  
3.38  
3.37  
3.35  
3.35  
3.34  
3.32  
3.09  
3.08  
3.07  
3.05  
3.04  
3.03  
3.02  
3.00  
2.99  
2.97  
2.95  
2.85  
2.84  
2.82  
2.81  
2.79  
2.77  
2.36  
2.35  
2.33  
2.32  
2.30  
2.29  
2.15  
2.14  
2.12  
2.11  
2.09  
2.08  
1.46  
1.44  
1.43  
1.41  
1.40  
1.38  
1.36  
1.34  
0.81  
0.80  
0.88

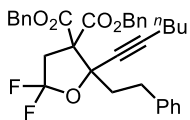

**4ar**

$^1\text{H}$  NMR (400 MHz,  $\text{CDCl}_3$ )

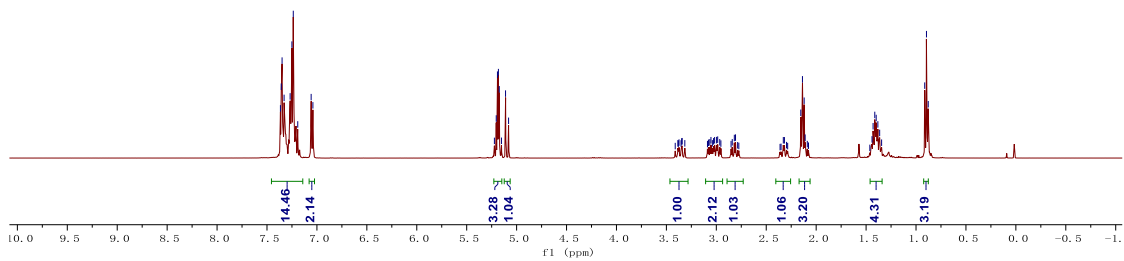

LHD-6013-3  
single pulse decoupled gated NOE

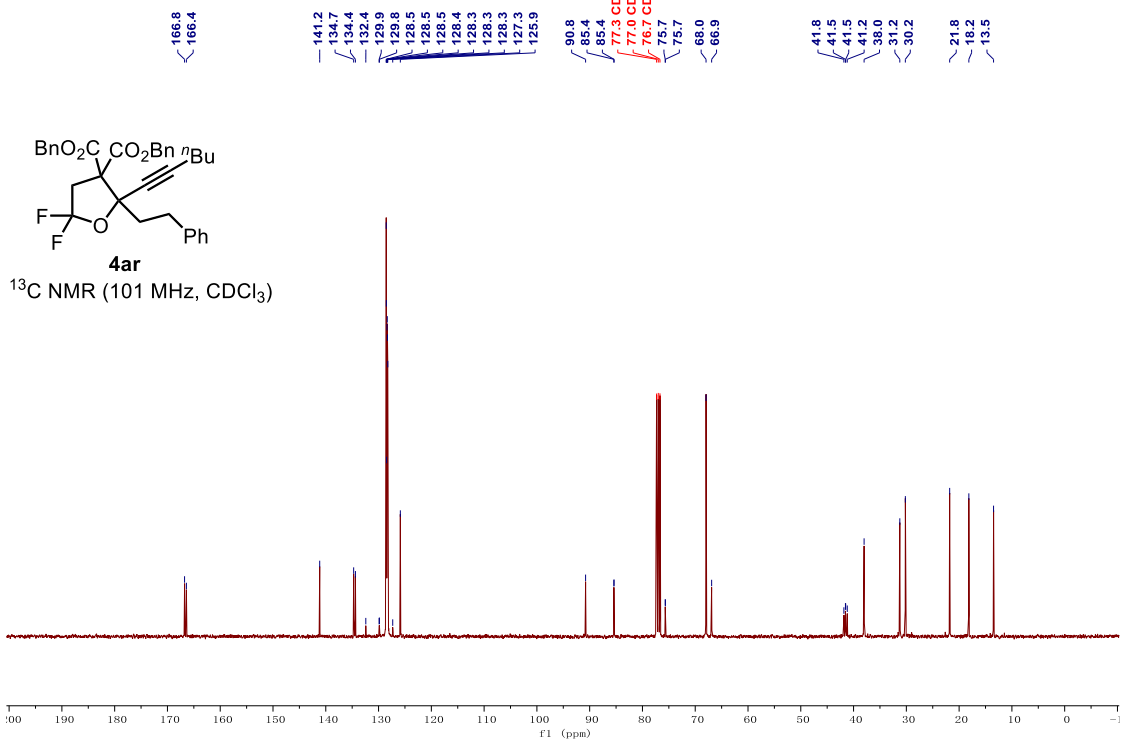

LHD-6013-3  
single\_pulse

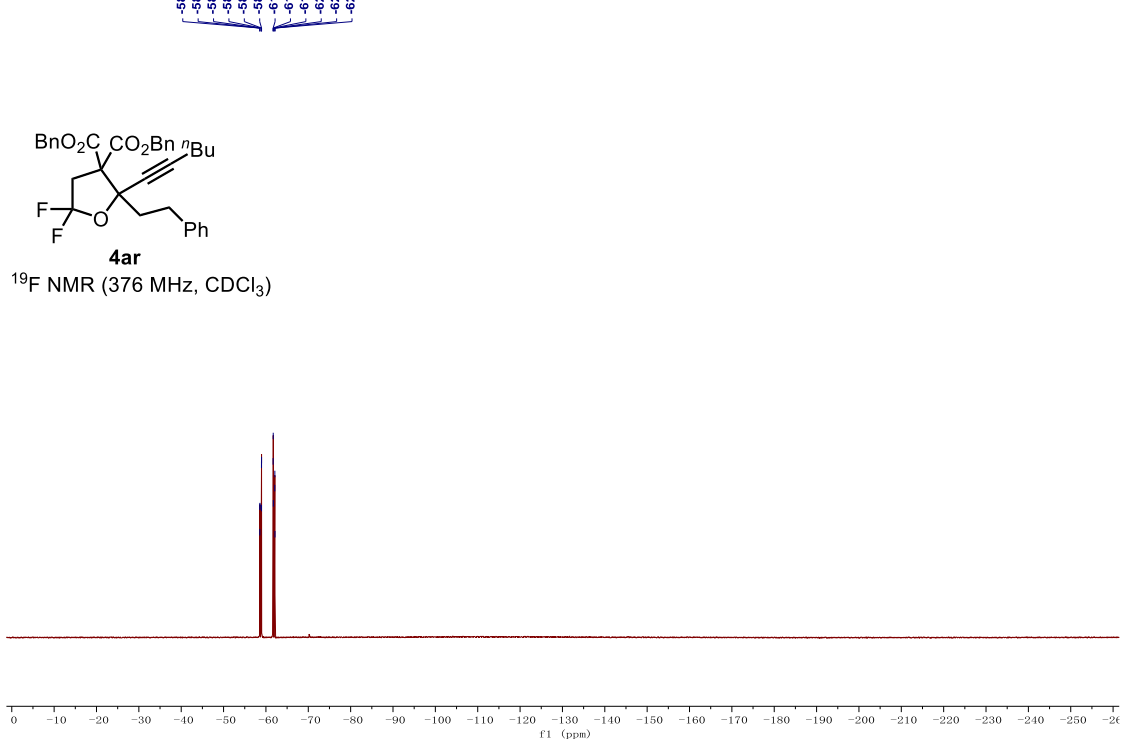

LHD-6051-3  
single\_pulse

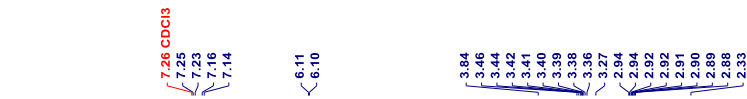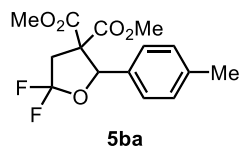

<sup>1</sup>H NMR (400 MHz, CDCl<sub>3</sub>)

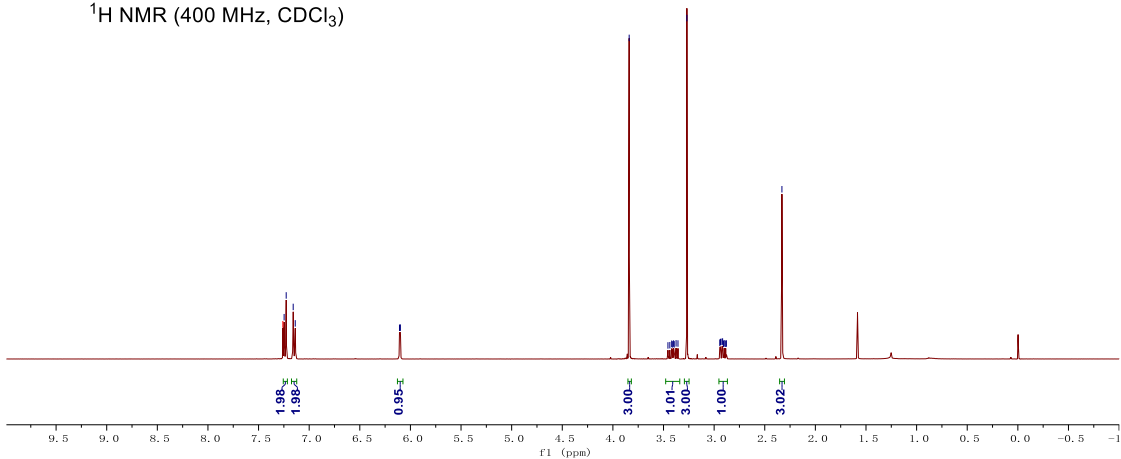

LHD-6051-3  
single\_pulse decoupled gated NOE

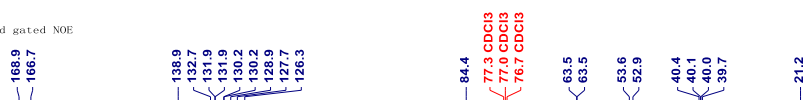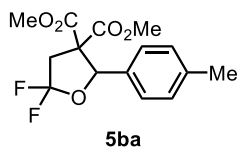

<sup>13</sup>C NMR (101 MHz, CDCl<sub>3</sub>)

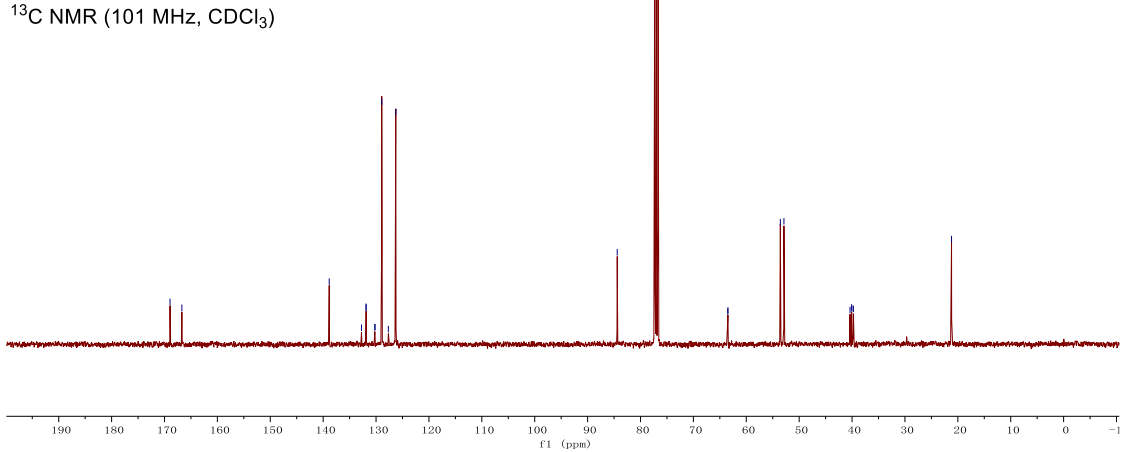



LHD-6051-3  
single\_pulse

58.86  
58.89  
58.91  
58.93  
59.25  
59.27  
72.11  
72.13

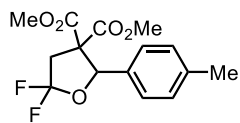

**5ba**

$^{19}\text{F}$  NMR (376 MHz,  $\text{CDCl}_3$ )

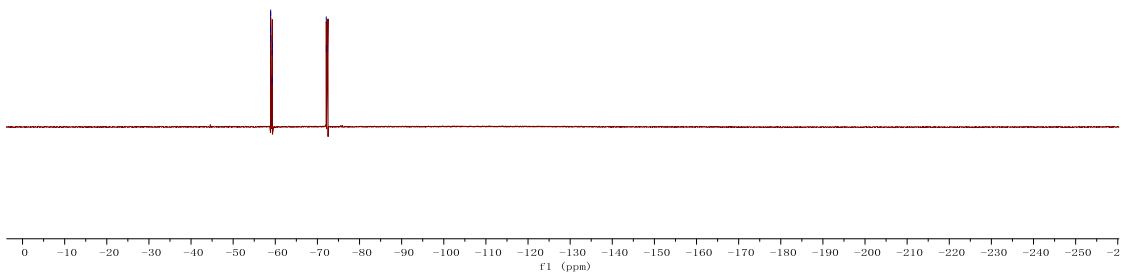

LHD-6035-4  
single\_pulse

7.25  
7.23  
7.14  
7.12  
6.10  
6.09  
4.36  
4.34  
4.33  
4.32  
4.31  
4.31  
4.30  
4.29  
4.28  
4.27  
4.26  
4.25  
4.23  
3.82  
3.81  
3.80  
3.79  
3.78  
3.60  
3.58  
3.57  
3.56  
3.45  
3.43  
3.42  
3.41  
3.40  
3.39  
3.37  
3.35  
2.83  
2.82  
2.80  
2.80  
2.89  
2.88  
2.87  
2.86  
2.31  
1.29  
1.27  
1.26  
0.89  
0.87  
n Ac

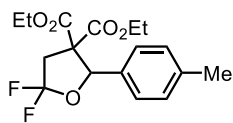

**5ca**

$^1\text{H}$  NMR (400 MHz,  $\text{CDCl}_3$ )

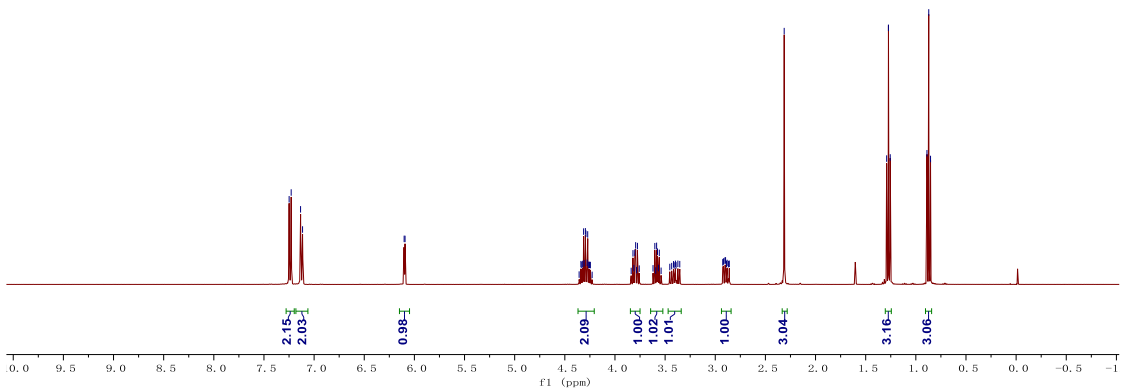

LHD-6035-4  
single pulse decoupled gated NOE

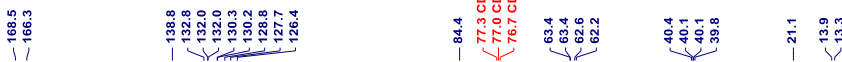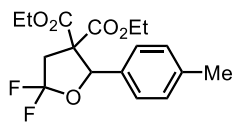

**5ca**

<sup>13</sup>C NMR (101 MHz, CDCl<sub>3</sub>)

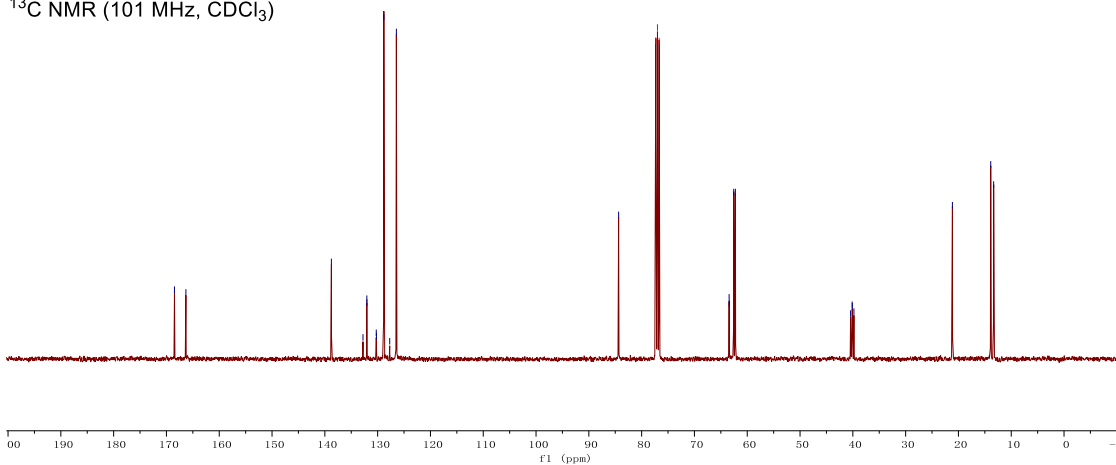

LHD-6035-4  
single\_pulse

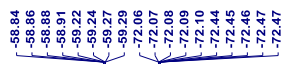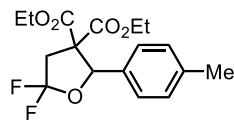

**5ca**

<sup>19</sup>F NMR (376 MHz, CDCl<sub>3</sub>)

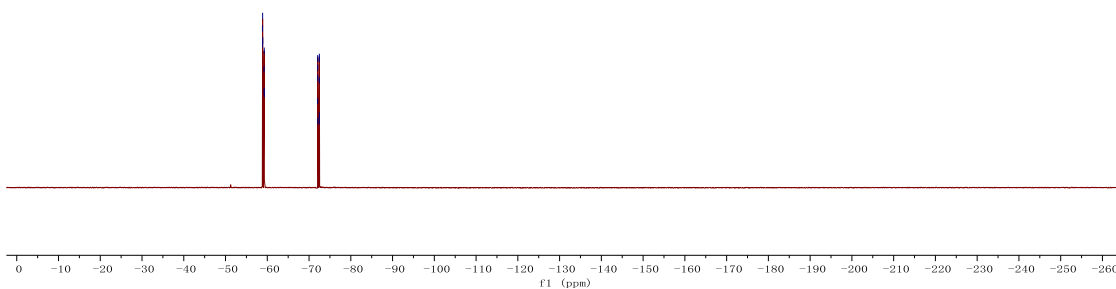

LHD-6021-5-2 1  
single\_pulse

7.31  
7.30  
7.28  
7.27  
7.25  
7.23  
7.16  
7.14  
7.07  
7.05  
6.95  
6.94  
6.03  
6.02

-5.18

4.77

4.74

4.38

4.35

3.66

3.64

3.62

3.60

3.58

3.57

3.55

-2.31

1.19

1.17

-0.00

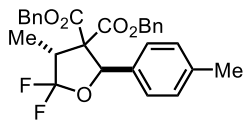

**5da**

<sup>1</sup>H NMR (400 MHz, CDCl<sub>3</sub>)

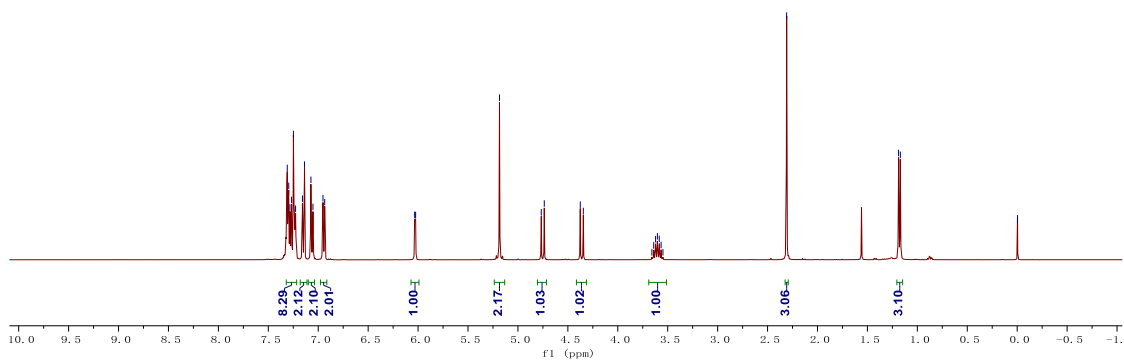

LHD-6021-5-2  
single\_pulse decoupled gated NOE

167.5  
166.3

138.9  
134.4  
134.2  
133.0  
132.4  
132.3  
130.5  
130.4  
129.0  
128.6  
128.6  
128.4  
127.9  
126.8

83.8

83.8

77.3 CDCl3

77.3 CDCl3

77.0 CDCl3

77.0 CDCl3

76.7 CDCl3

76.7 CDCl3

66.1

66.1

66.7

66.7

44.2

43.8

43.6

-21.2

9.5

9.4

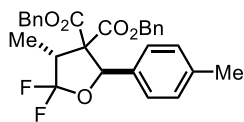

**5da**

<sup>13</sup>C NMR (101 MHz, CDCl<sub>3</sub>)

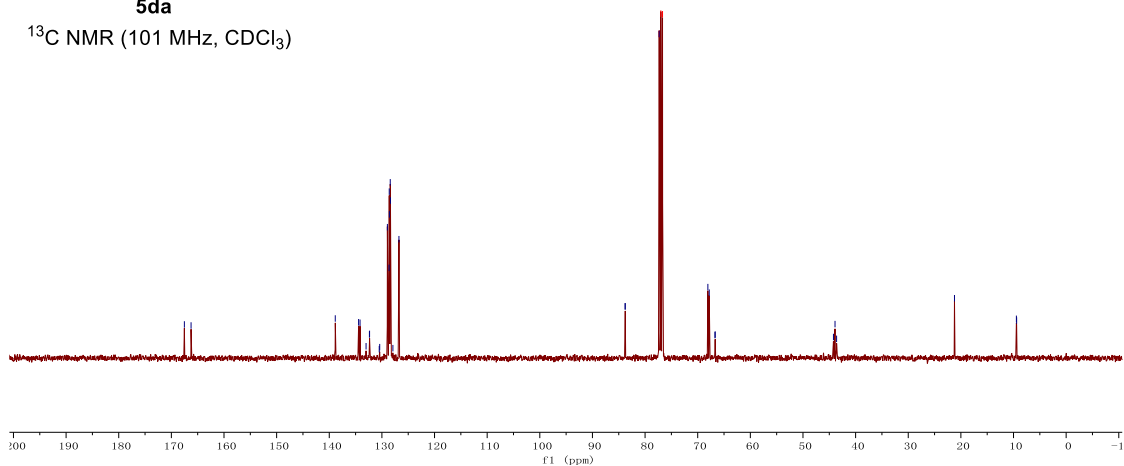

LHD-6021-5-2 1  
single\_pulse

71.43  
71.47  
71.81  
71.85  
76.48  
76.51  
76.88  
76.90

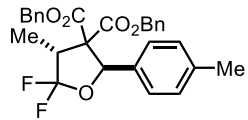

**5da**

<sup>19</sup>F NMR (376 MHz, CDCl<sub>3</sub>)

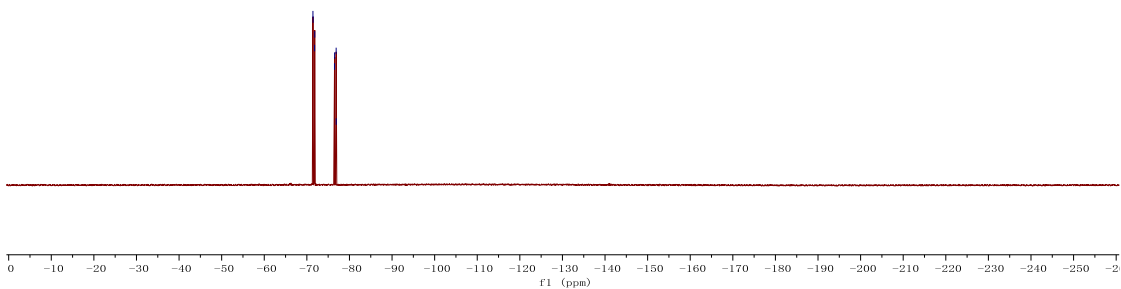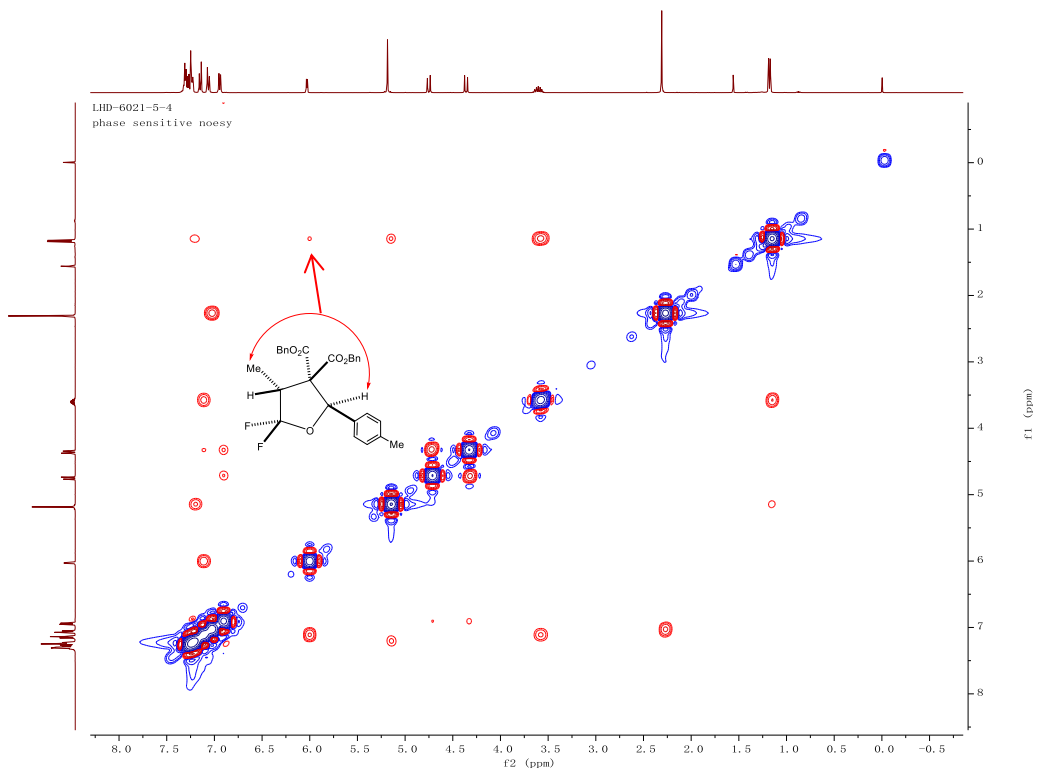

LHD-6107-1-P  
single\_pulse

7.32  
7.29  
7.27  
7.26  
7.14  
7.12  
7.08  
7.06  
7.00  
6.98  
6.00  
5.99  
5.26  
5.23  
5.19  
4.77  
4.74  
4.40  
4.37  
3.52  
3.48  
3.46  
3.42  
2.32  
1.40  
1.37  
1.24  
1.20  
0.91  
0.89  
0.87  
-0.00

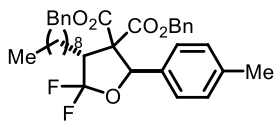

**5ea**

<sup>1</sup>H NMR (400 MHz, CDCl<sub>3</sub>)

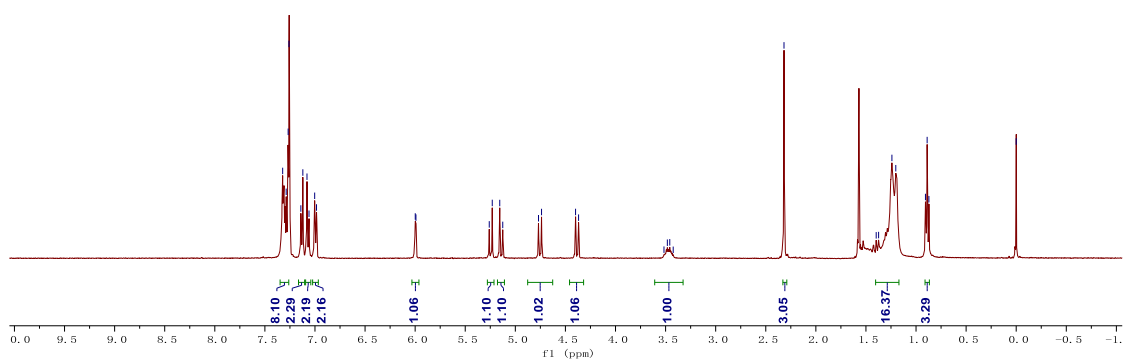

LHD-6107-1-P  
single\_pulse decoupled gated NOE

167.8  
166.2  
138.9  
134.4  
134.2  
133.9  
128.9  
128.7  
128.6  
128.5  
128.4  
126.9  
77.3 CDCl<sub>3</sub>  
77.0 CDCl<sub>3</sub>  
76.7 CDCl<sub>3</sub>  
68.1  
67.8  
66.7  
66.6  
48.5  
48.2  
47.9  
31.8  
29.5  
29.3  
29.3  
28.3  
26.9  
25.5  
25.4  
22.7  
21.2  
14.1

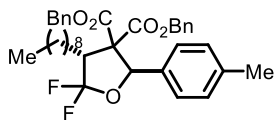

**5ea**

<sup>13</sup>C NMR (101 MHz, CDCl<sub>3</sub>)

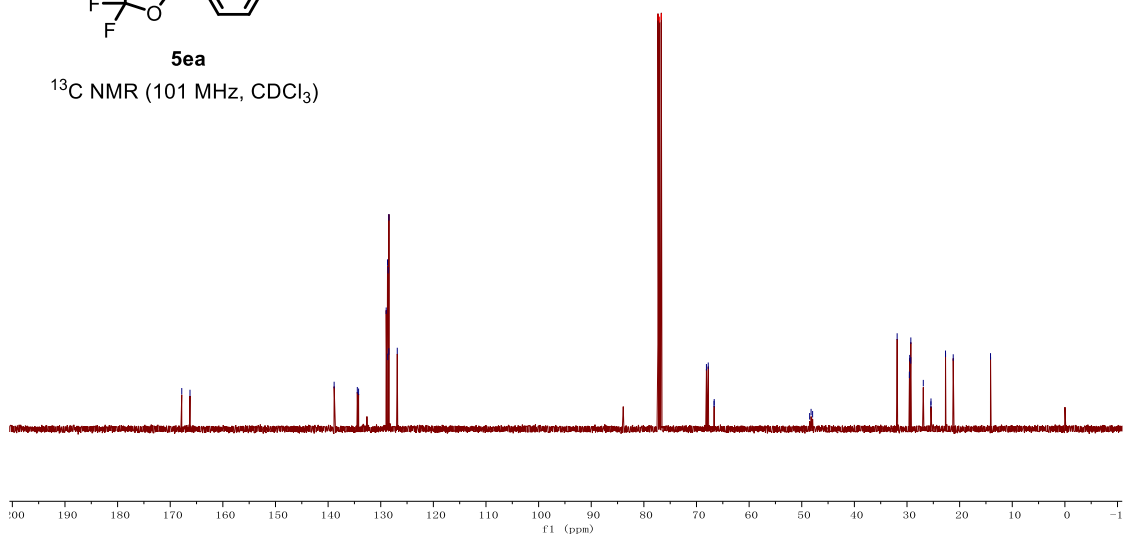

LHD-5107-1-P  
single\_pulse

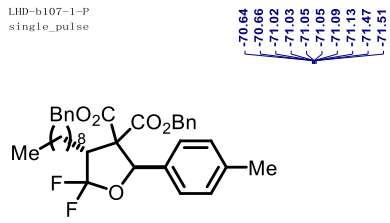

**5ea**

<sup>19</sup>F NMR (376 MHz, CDCl<sub>3</sub>)

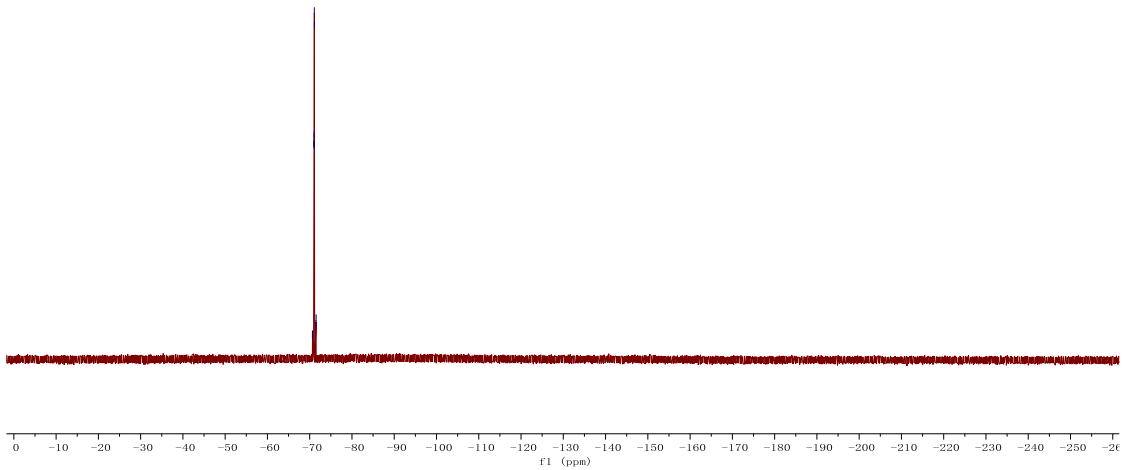

LHD-6075-1-2  
single\_pulse

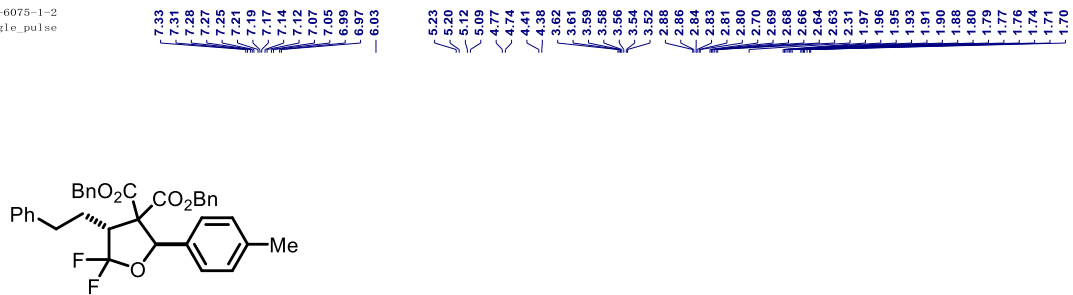

**5fa**

<sup>1</sup>H NMR (400 MHz, CDCl<sub>3</sub>)

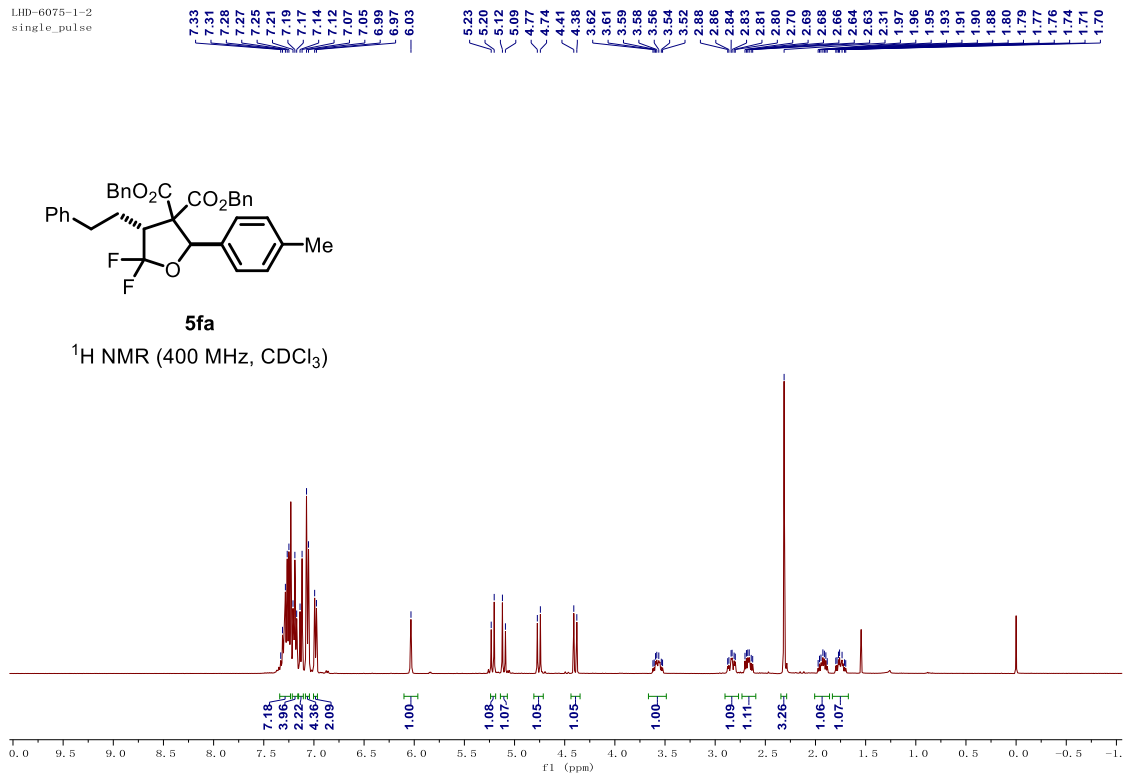

LHD-6075-1-2  
single pulse decoupled gated NOE

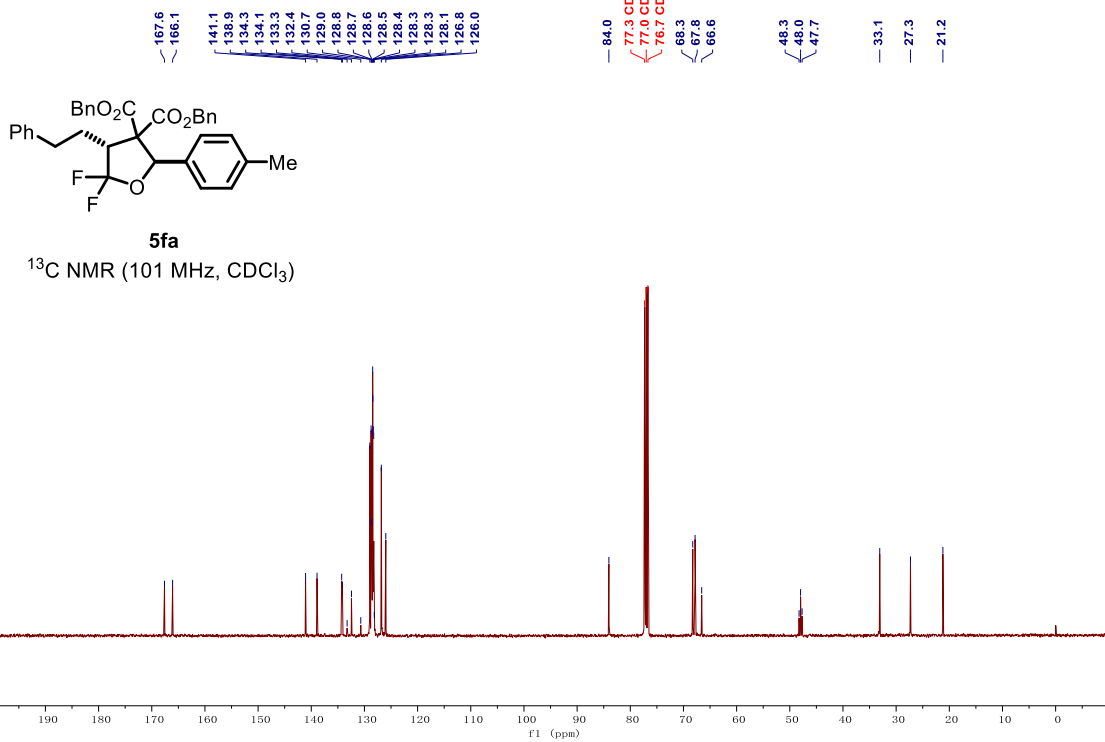

LHD-6075-1-2  
single\_pulse

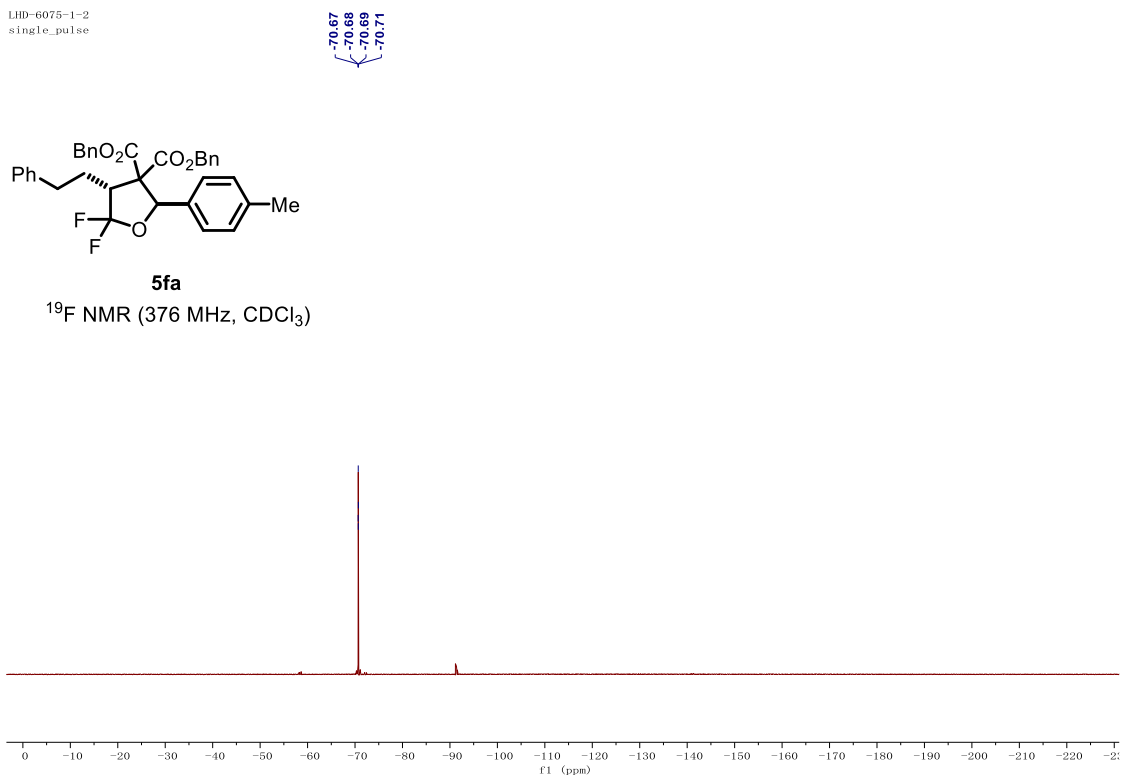

LHD-6075-2-2  
single\_pulse

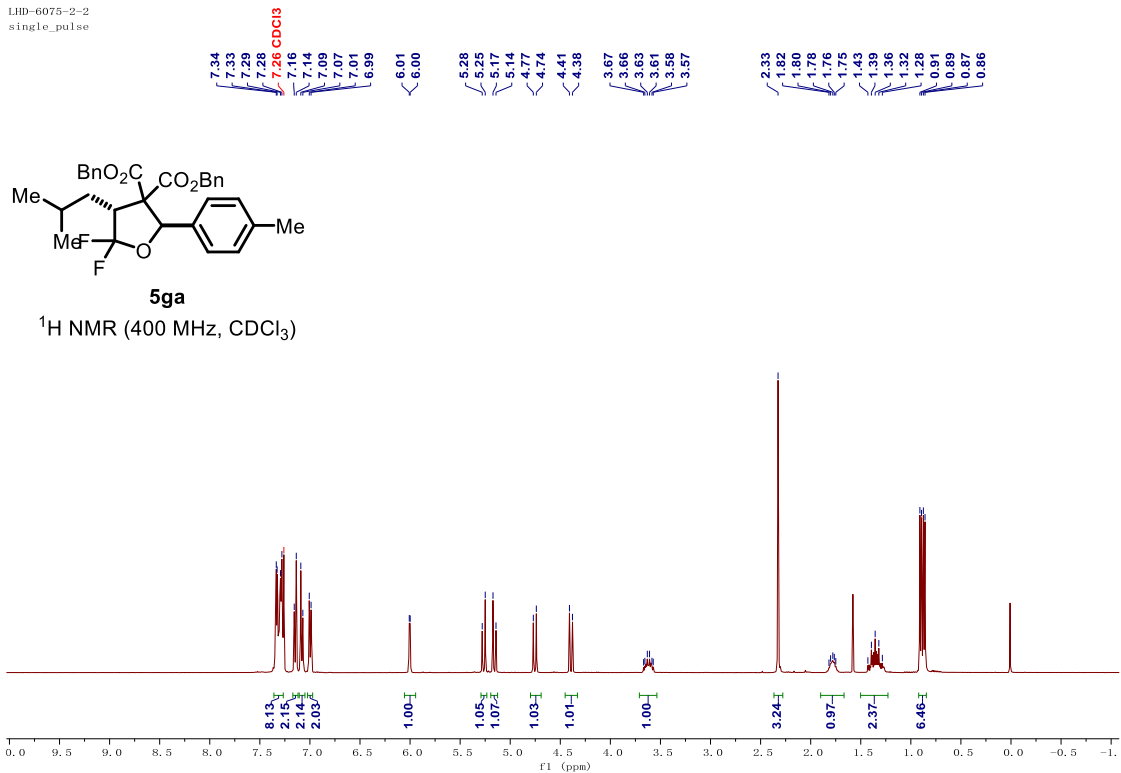

LHD-6075-2-2  
single\_pulse decoupled gated NOE

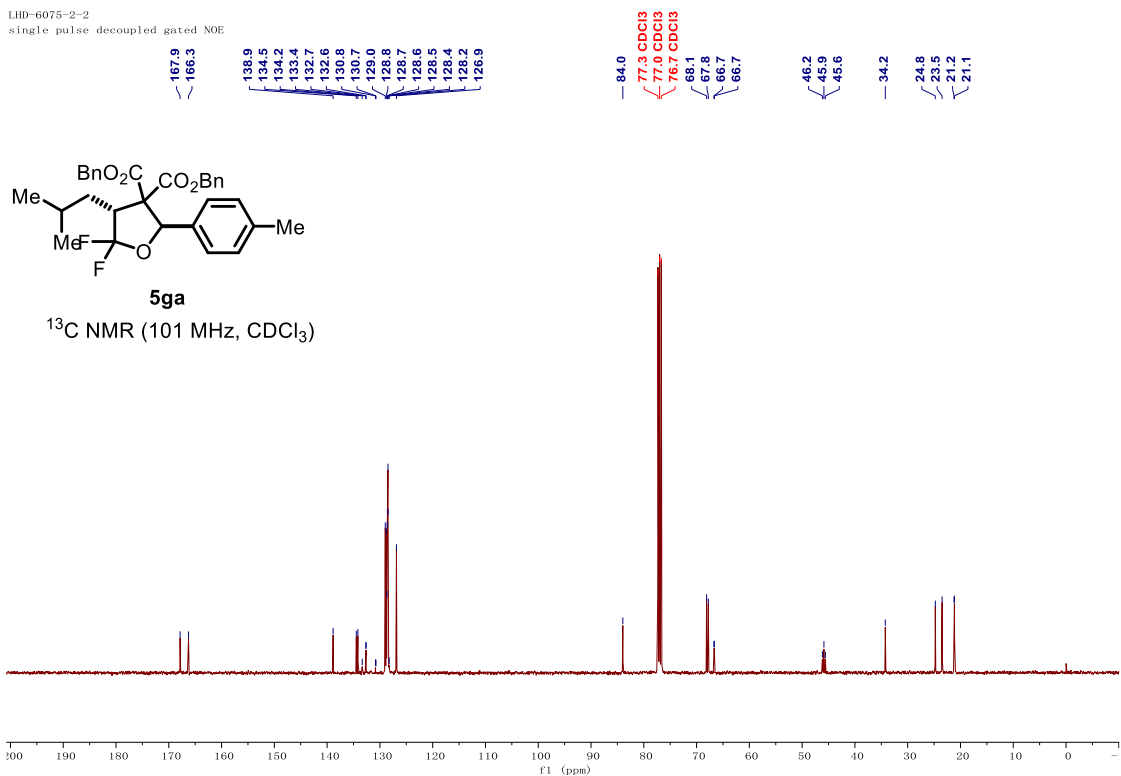



LHD-6075-2-2  
single\_pulse

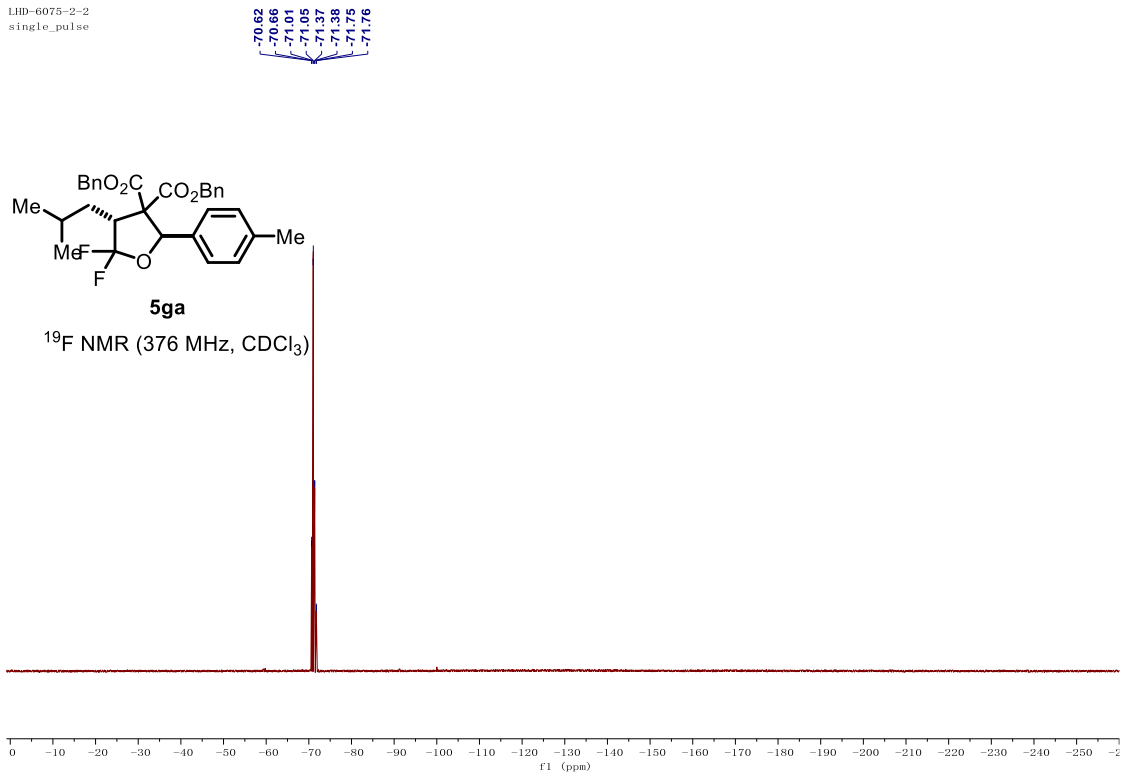

LHD-7130-2-3  
single\_pulse

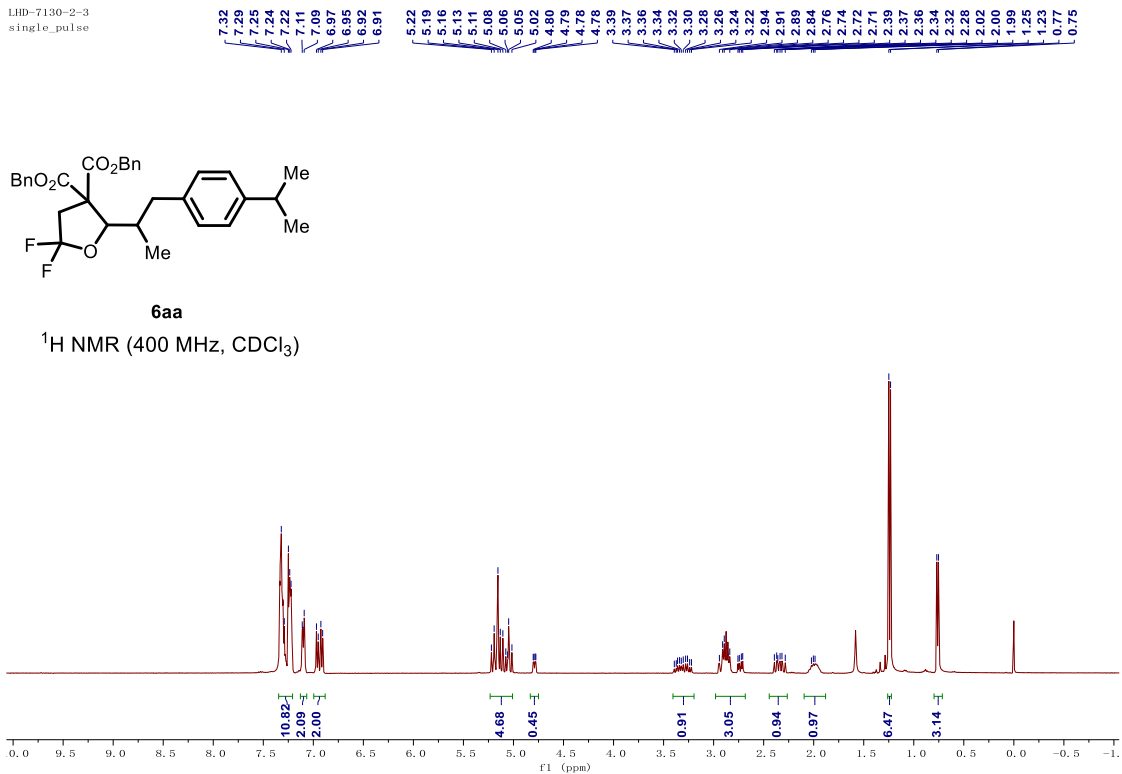

LHD-7130-2-3  
single pulse decoupled gated NOE

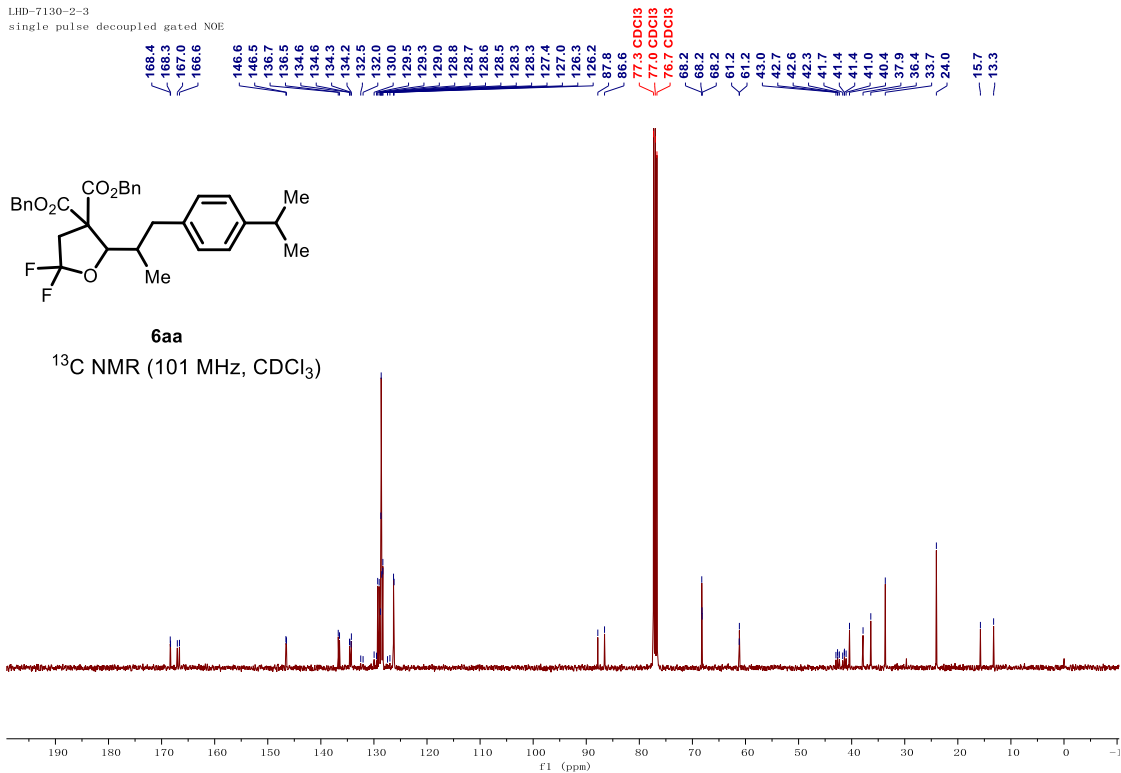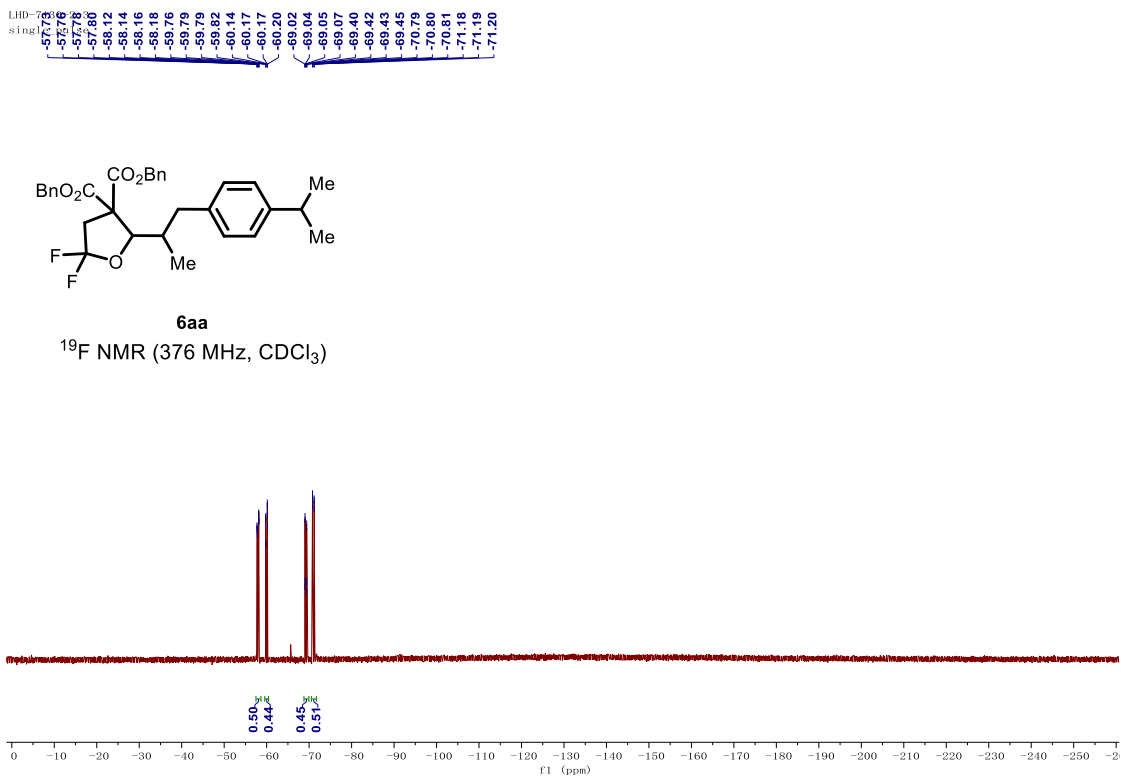

LHD-7136-1-3  
single\_pulse

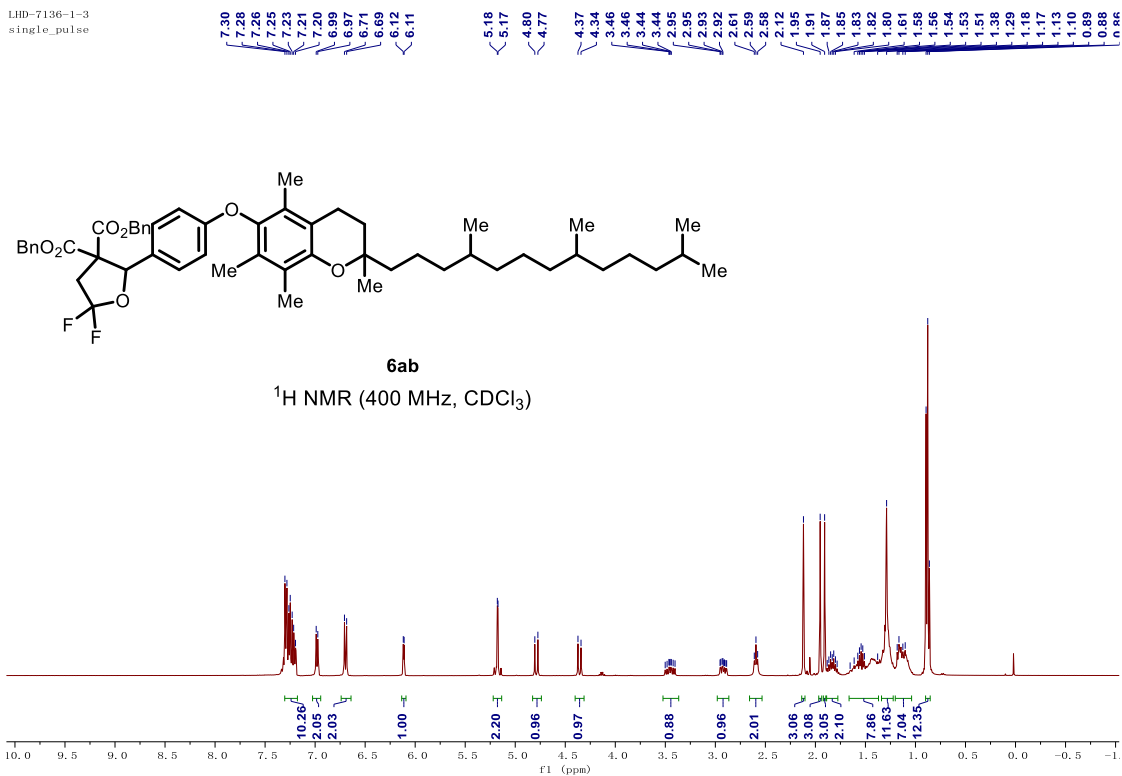

LHD-7136-1-3  
single\_pulse decoupled gated NOE

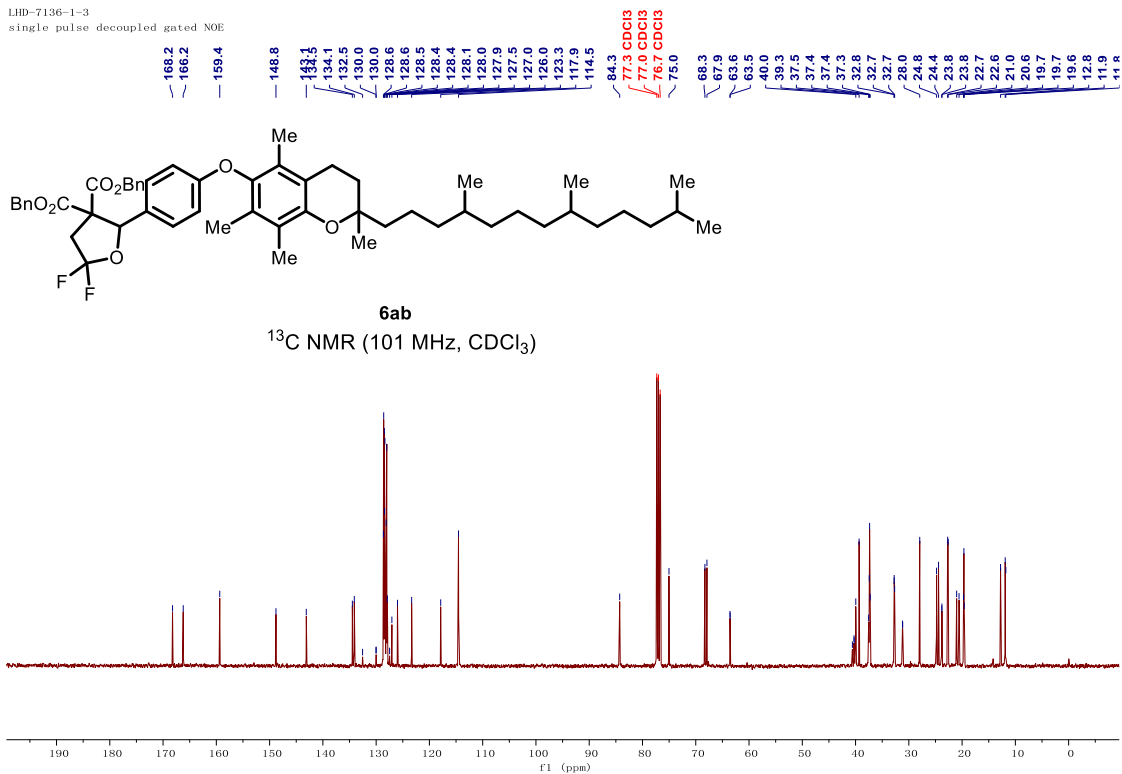

LHD-7136-1  
single\_pulse

-58.97  
-58.99  
-59.01  
-59.03  
-59.35  
-59.37  
-59.39  
-59.42  
-71.80  
-71.81  
-71.82  
-72.18  
-72.19  
-72.20

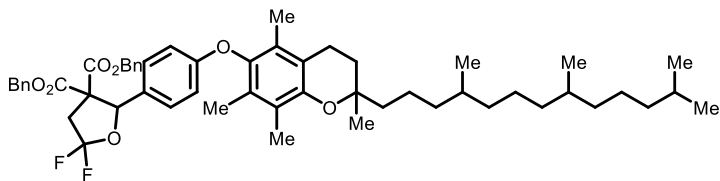

6ab

<sup>19</sup>F NMR (376 MHz, CDCl<sub>3</sub>)

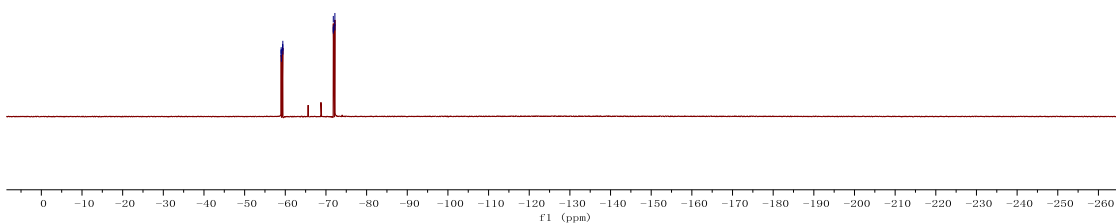

LHD-7140-2-2  
single\_pulse

7.82  
7.81  
7.80  
7.53  
7.52  
7.26  
7.25  
7.24  
7.24  
7.23  
7.06  
7.04  
6.91  
6.90  
6.89

5.43

4.97

4.93

4.15

4.13

4.12

4.10

3.59

3.58

3.56

3.49

3.45

3.32

3.30

3.28

3.23

3.21

3.20

3.19

3.17

3.15

1.25

1.24

1.22

-0.00

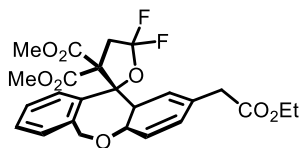

6bc

<sup>1</sup>H NMR (400 MHz, CDCl<sub>3</sub>)

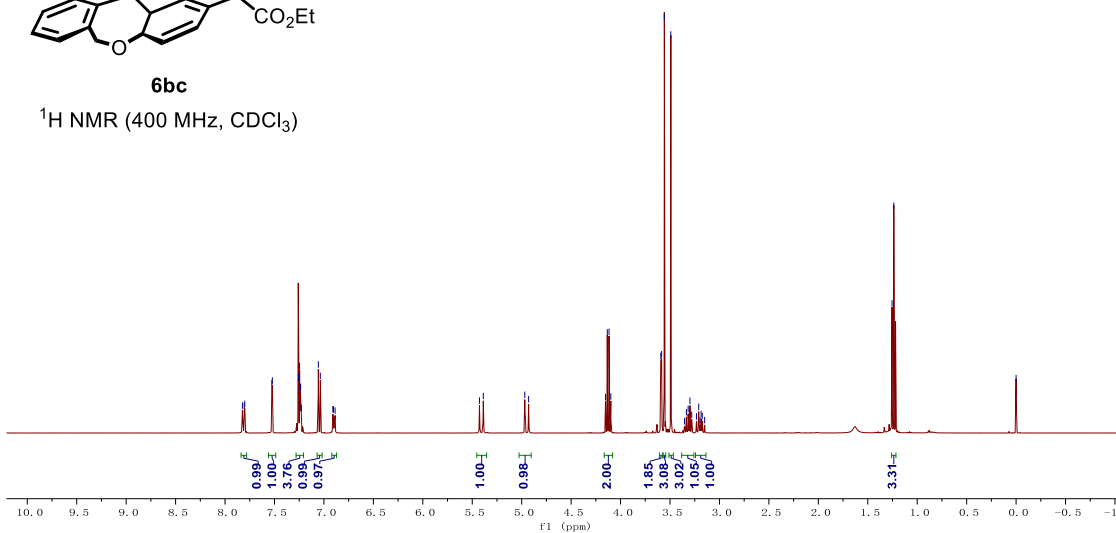

LHD-7140-2-2  
single pulse decoupled gated NOE

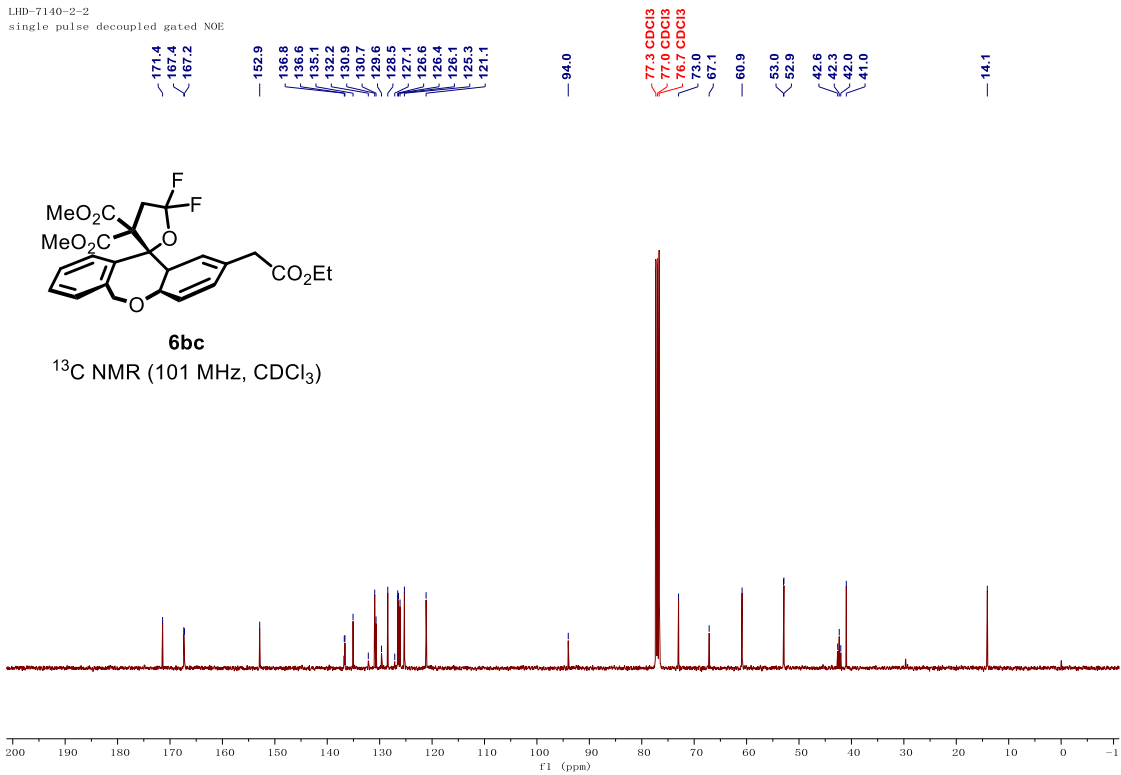

LHD-7140-2-2  
single\_pulse

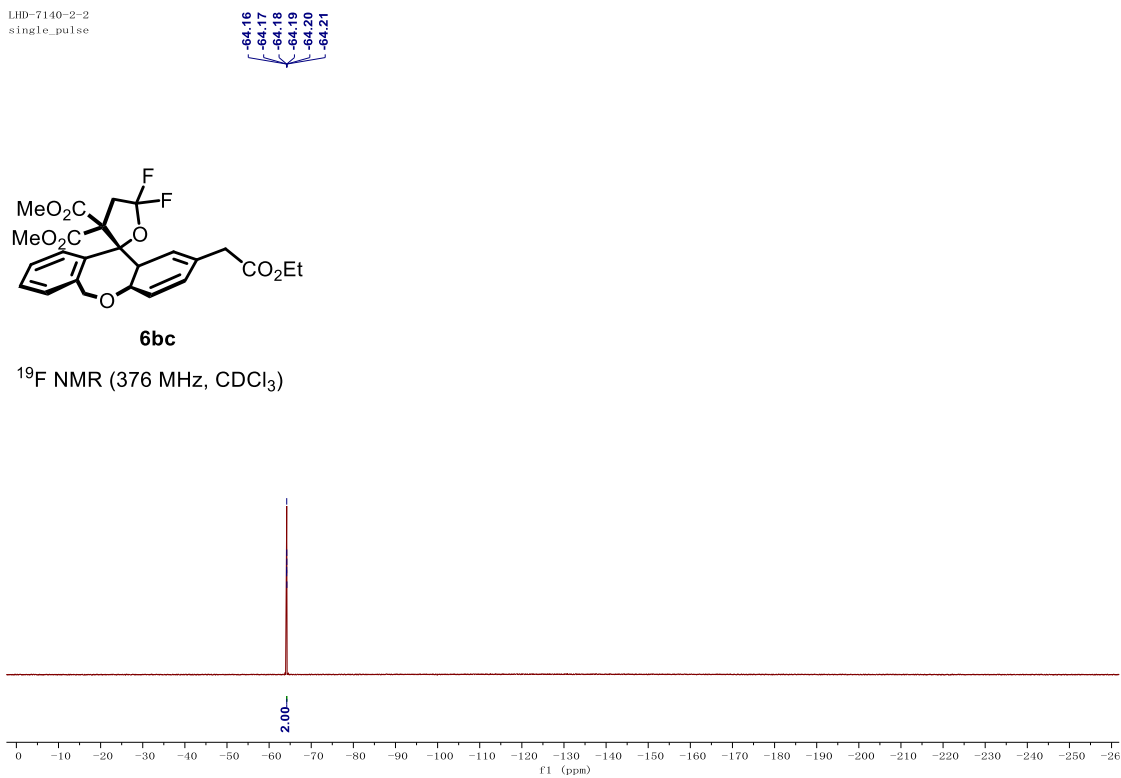

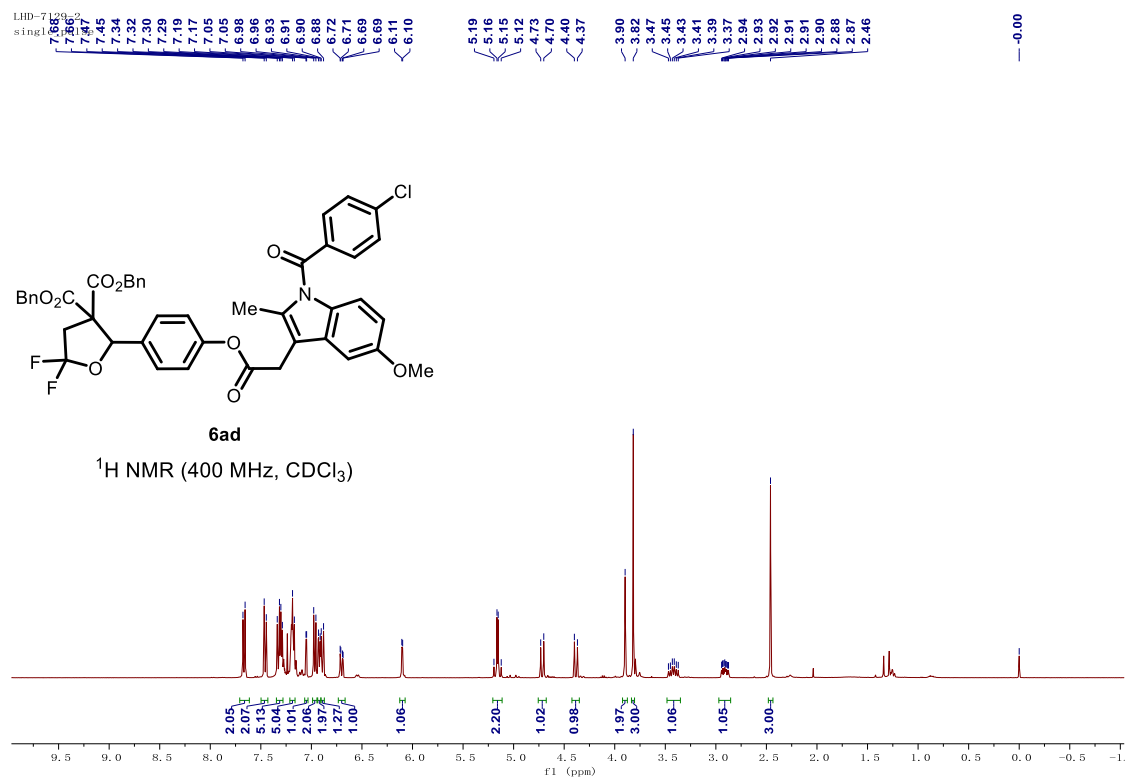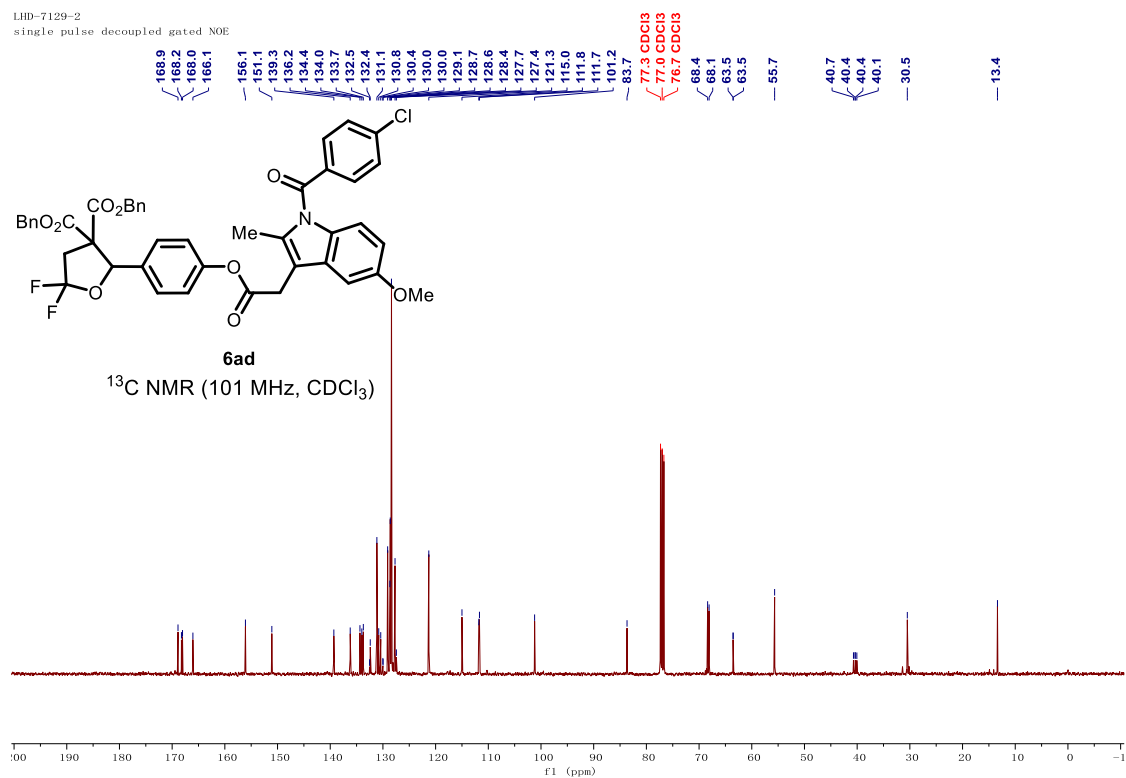

LHD-7129-2  
single\_pulse

-59.2  
-59.3  
-59.3  
-59.3  
-59.6  
-59.7  
-59.7  
-71.5  
-71.5  
-71.6  
-71.9  
-71.9  
-71.9

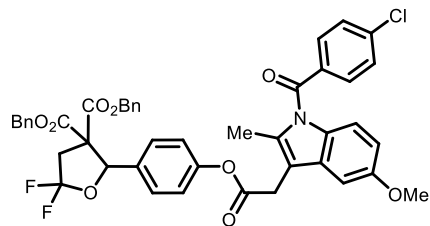

**6ad**

$^{19}\text{F}$  NMR (376 MHz,  $\text{CDCl}_3$ )

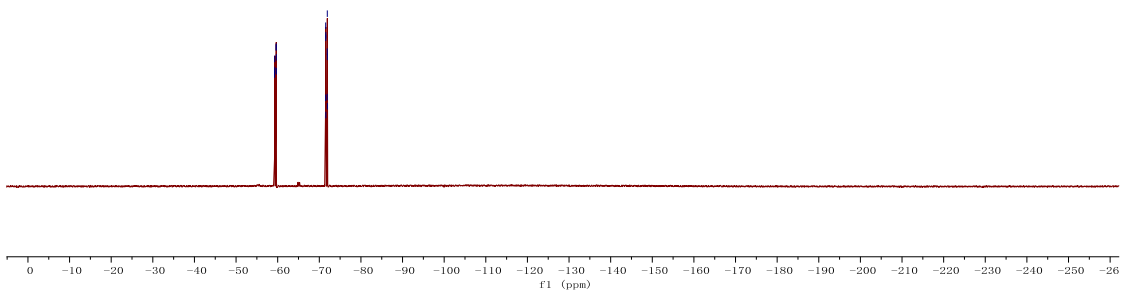

LHD-7128-2-3  
single\_pulse

7.58  
7.56  
7.53  
7.52  
7.50  
7.36 CDCl3  
7.19  
7.17  
7.10  
7.09  
7.07  
7.06  
7.04  
6.68  
6.66  
5.10  
5.08  
5.06  
5.05  
5.05  
5.02  
5.02  
3.99  
3.91  
4.89  
4.88  
4.88  
4.84  
4.83  
4.81  
4.80  
3.50  
3.48  
3.46  
3.45  
3.44  
3.41  
3.33  
3.32  
3.31  
3.29  
3.28  
3.27  
3.25  
1.56  
1.18  
1.17

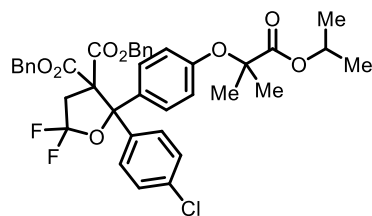

**6ae**

$^1\text{H}$  NMR (400 MHz,  $\text{CDCl}_3$ )

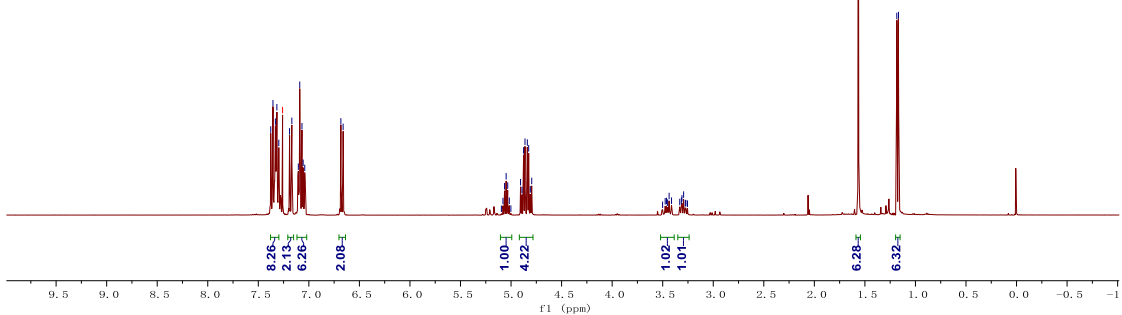

lhd-7128-2-3  
single pulse decoupled gated NOE

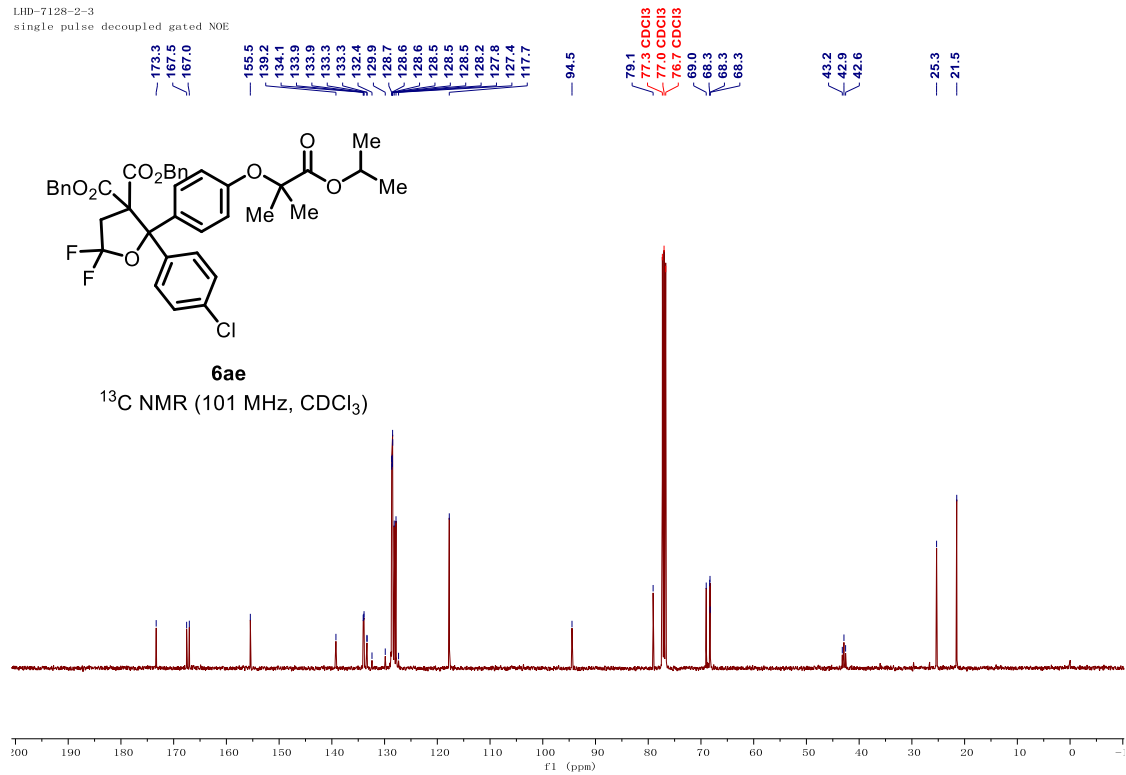

lhd-7128-2-2  
single\_pulse

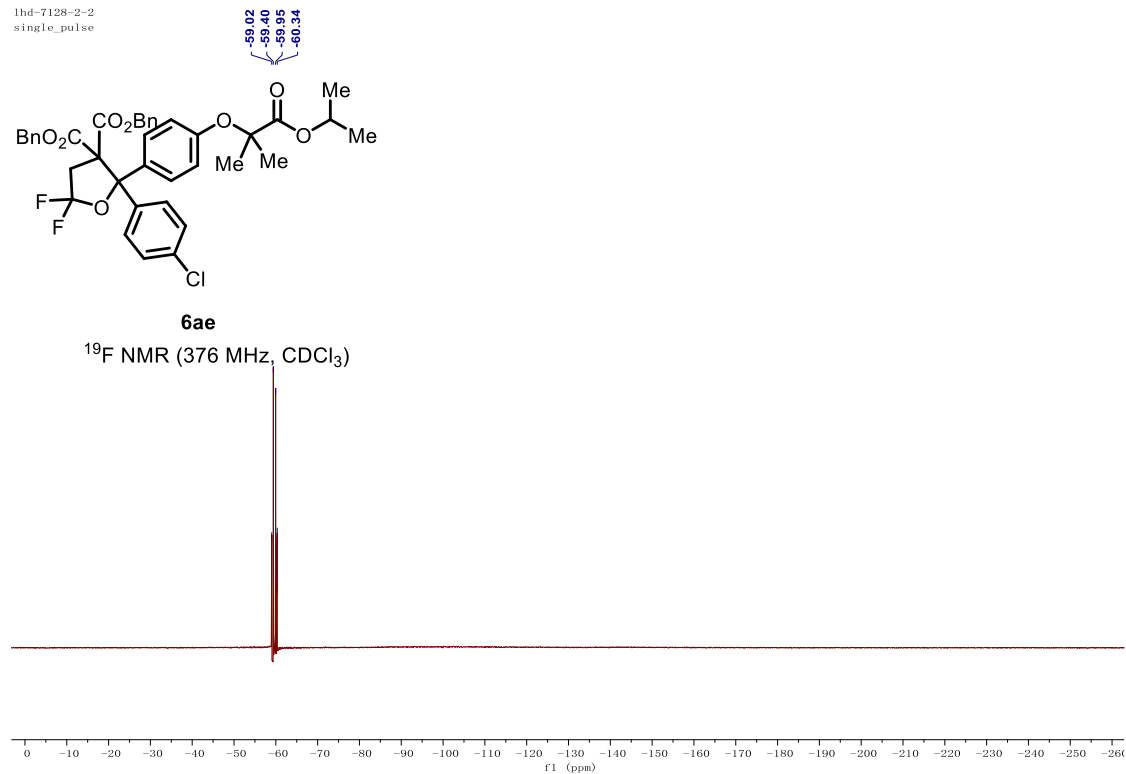



LHD-7136-3-4  
single\_pulse

8.04  
8.02  
7.56  
7.54  
7.52  
7.44  
7.42  
7.41  
7.34  
7.34  
7.35  
7.30  
7.29  
5.26  
5.23  
5.22  
5.19  
5.14  
5.10  
5.07  
4.83  
4.81  
4.79  
3.12  
3.09  
3.07  
2.30  
2.28  
2.25  
1.81  
1.79  
1.76  
1.67  
1.64  
1.61  
1.49  
1.47  
1.37  
1.33  
1.31  
1.28  
1.25  
1.19  
1.17  
1.13  
1.09  
1.05  
0.76  
0.57

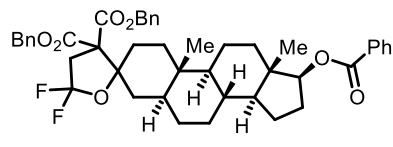

**6af**

<sup>1</sup>H NMR (400 MHz, CDCl<sub>3</sub>)

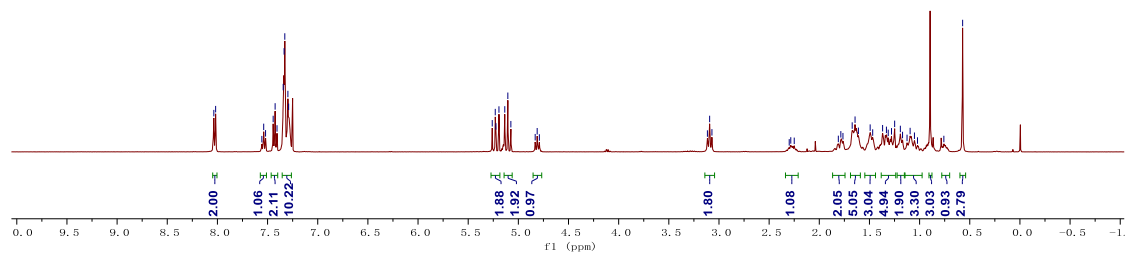

LHD-7136-3-4  
single pulse decoupled gated NOE

167.5  
167.4  
166.5  
134.6  
134.5  
132.7  
132.1  
130.7  
129.6  
129.5  
128.7  
128.6  
128.6  
128.5  
128.5  
127.1  
90.1  
83.3  
77.3 CDCl<sub>3</sub>  
77.0 CDCl<sub>3</sub>  
76.7 CDCl<sub>3</sub>  
67.8  
65.4  
53.4  
50.6  
43.0  
41.5  
41.2  
41.2  
40.9  
36.9  
35.2  
35.1  
34.6  
33.9  
31.2  
28.0  
27.9  
27.7  
23.6  
20.4  
12.4  
11.3

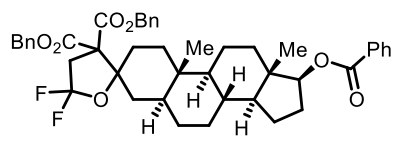

**6af**

<sup>13</sup>C NMR (101 MHz, CDCl<sub>3</sub>)

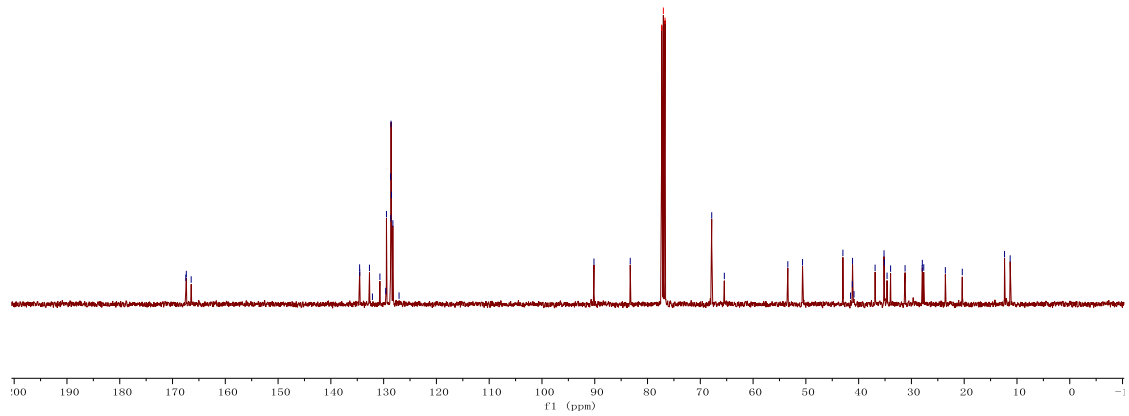

LHD-7136-3-4  
single\_pulse

57.85  
57.87  
57.89  
58.24  
58.26  
58.28  
58.78  
58.81  
58.83  
59.17  
59.20  
59.22

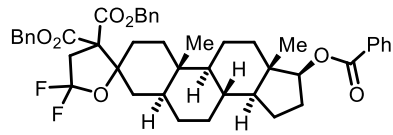

**6af**

<sup>19</sup>F NMR (376 MHz, CDCl<sub>3</sub>)

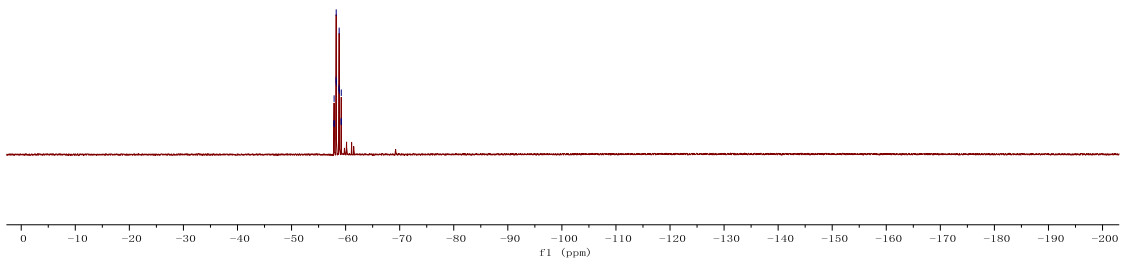

LHD-8118-2-2  
single\_pulse

7.28  
7.26  
7.13  
7.11

5.67

3.82

3.62

3.27

3.22

3.07

3.03

2.32

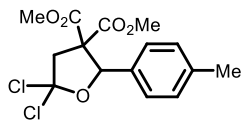

**8**

<sup>1</sup>H NMR (400 MHz, CDCl<sub>3</sub>)

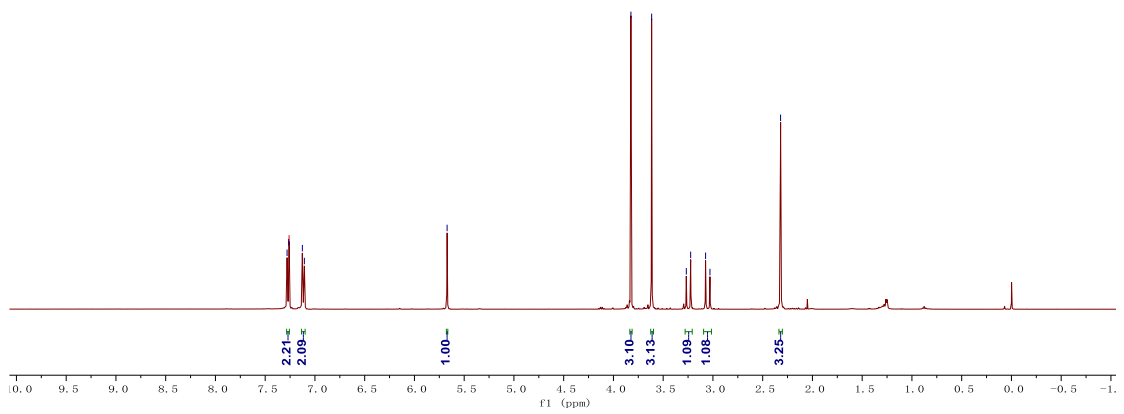

LHD-8118-2-2  
single pulse decoupled gated NOE

175.9  
168.1  
167.7

139.1  
133.1  
128.8  
128.4

77.3 CDCl<sub>3</sub>  
77.0 CDCl<sub>3</sub>  
76.7 CDCl<sub>3</sub>

63.4  
62.2

53.3  
52.9

35.2

21.1

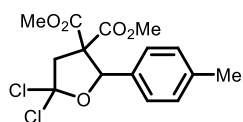

8

<sup>13</sup>C NMR (101 MHz, CDCl<sub>3</sub>)

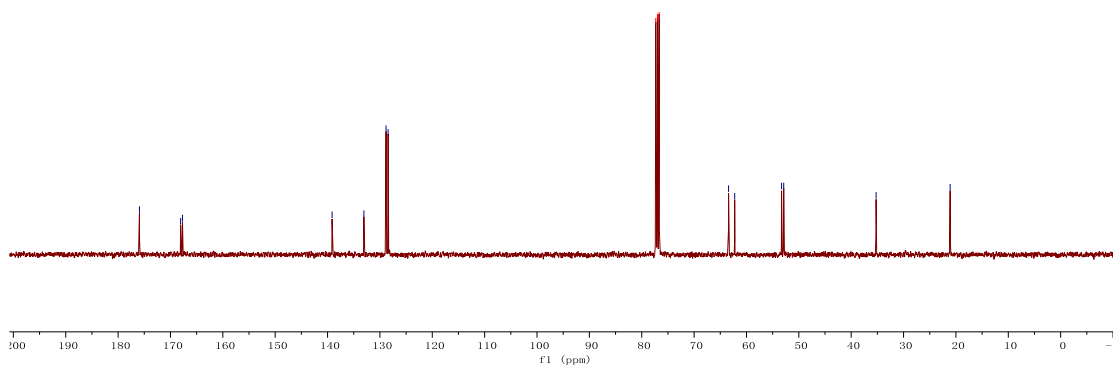

LHD-7060-4  
single\_pulse

7.26 CDCl<sub>3</sub>  
7.25  
7.23  
7.17  
7.15

6.14

3.84

3.51

3.46

3.29

2.98

2.94

2.33

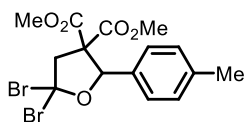

9

<sup>1</sup>H NMR (400 MHz, CDCl<sub>3</sub>)

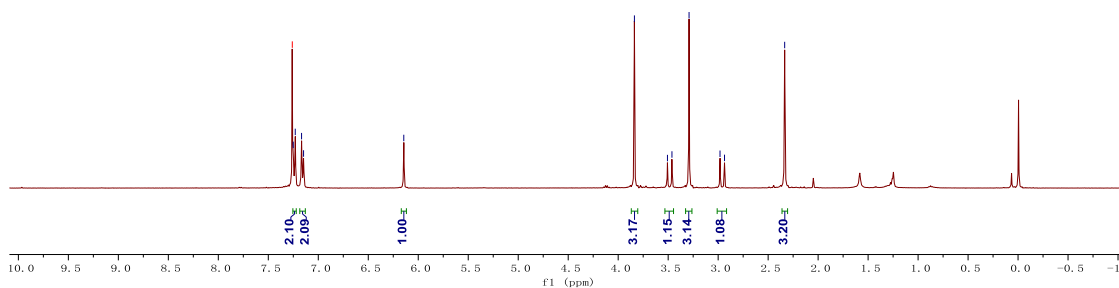

LHD-7060-4  
single pulse decoupled gated NOE

177.7  
166.6  
167.2

139.1  
131.3  
129.0  
126.1

82.4  
77.3 CDCl3  
77.0 CDCl3  
76.7 CDCl3

61.9  
53.5  
52.9

36.2

21.2

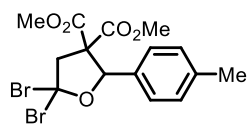

9

<sup>13</sup>C NMR (101 MHz, CDCl<sub>3</sub>)

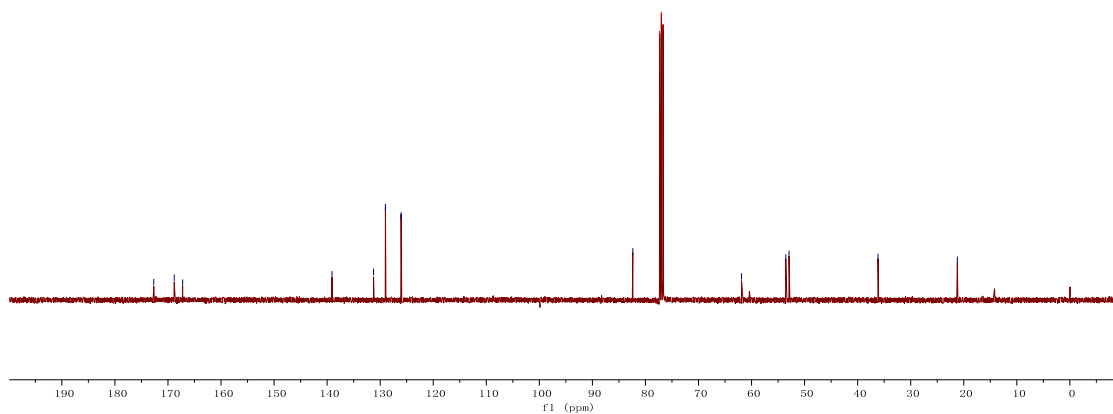

LHD-6097-4  
single\_pulse

7.62  
7.61  
7.60  
7.57  
7.55  
7.41  
7.40  
7.38  
7.36  
7.26  
7.23  
7.21  
7.16  
7.14  
6.84  
6.82  
5.81  
5.29  
5.26  
5.24  
5.23  
5.21  
5.20  
5.19  
5.16  
4.78  
4.75  
4.53  
4.50

2.35

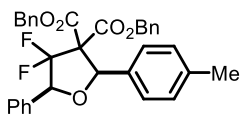

11

<sup>1</sup>H NMR (400 MHz, CDCl<sub>3</sub>)

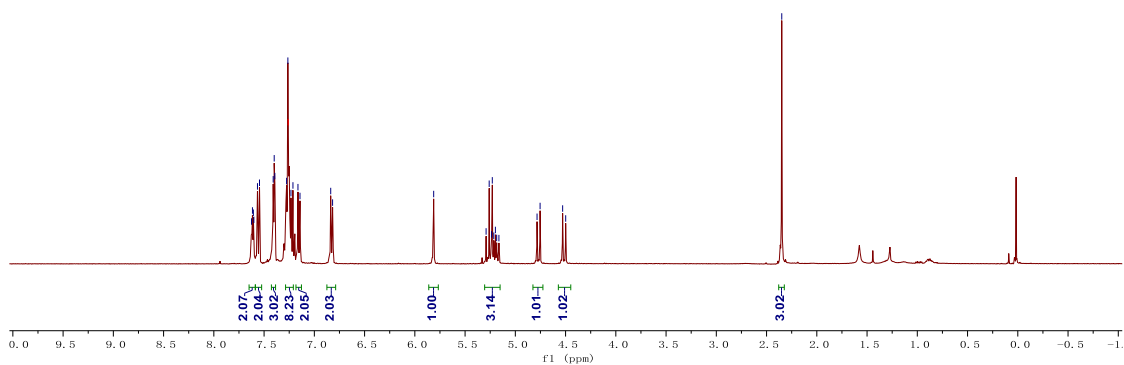

LHD-6097-4  
single pulse decoupled gated NOE

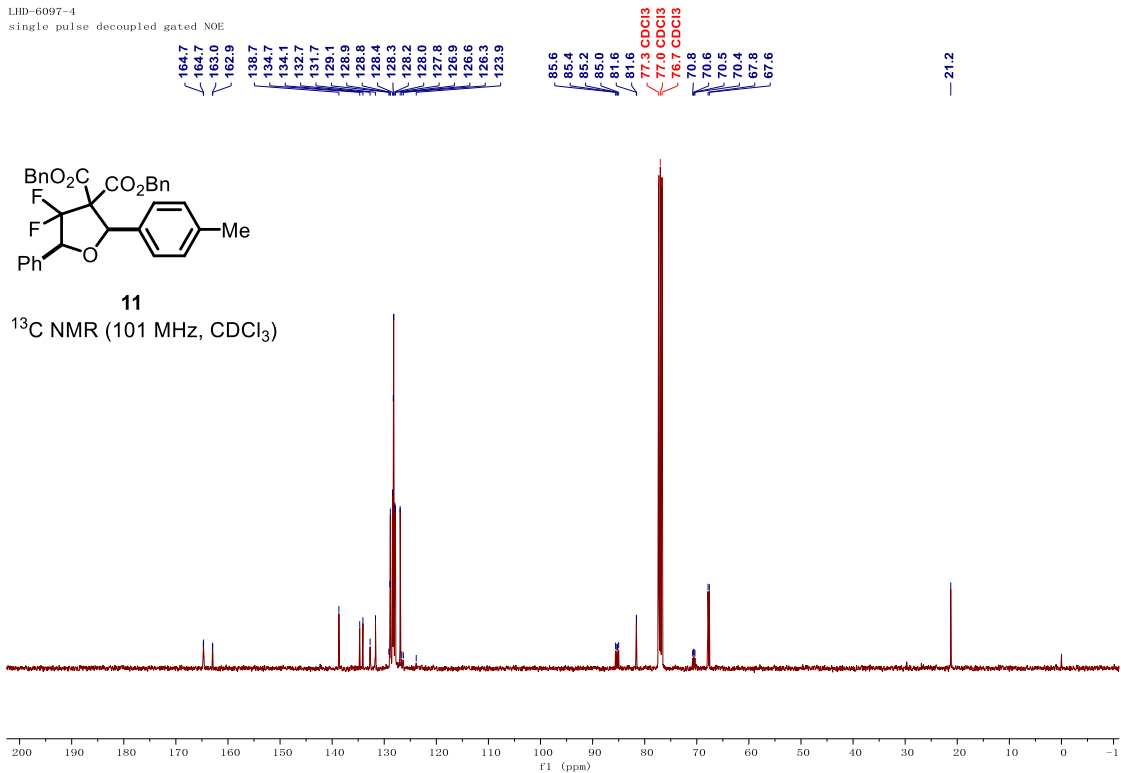

— 21.2

LHD-6097-4  
single\_pulse

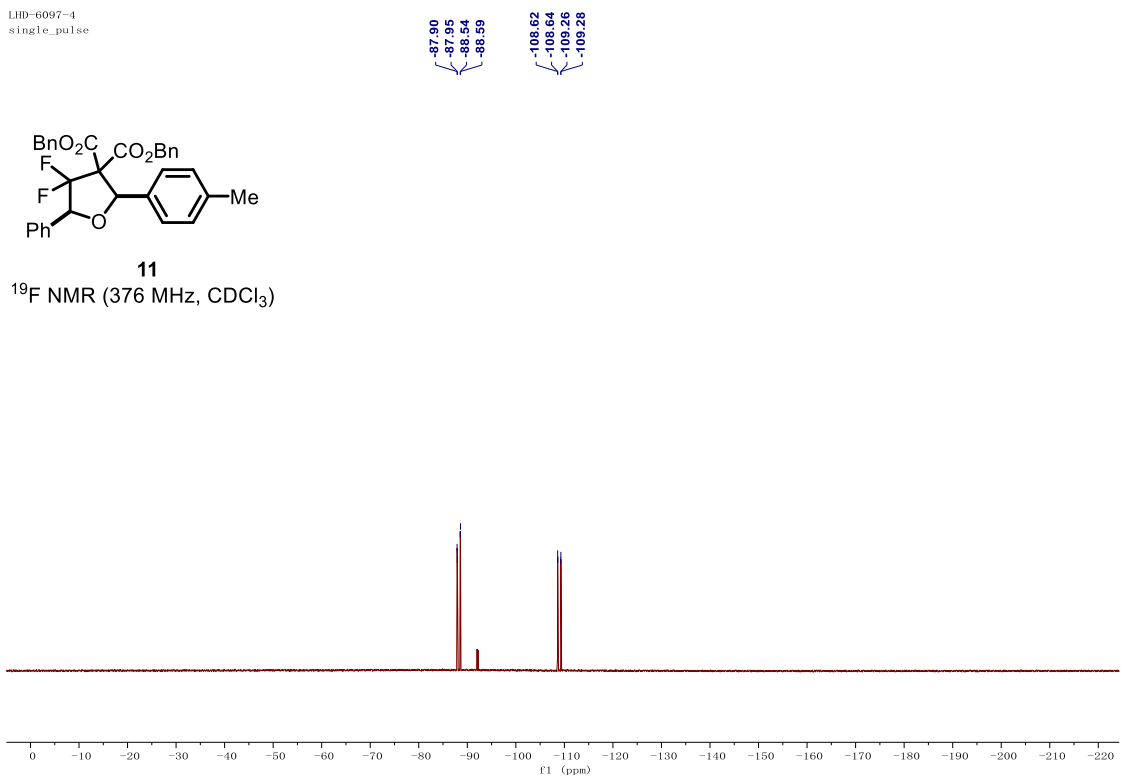

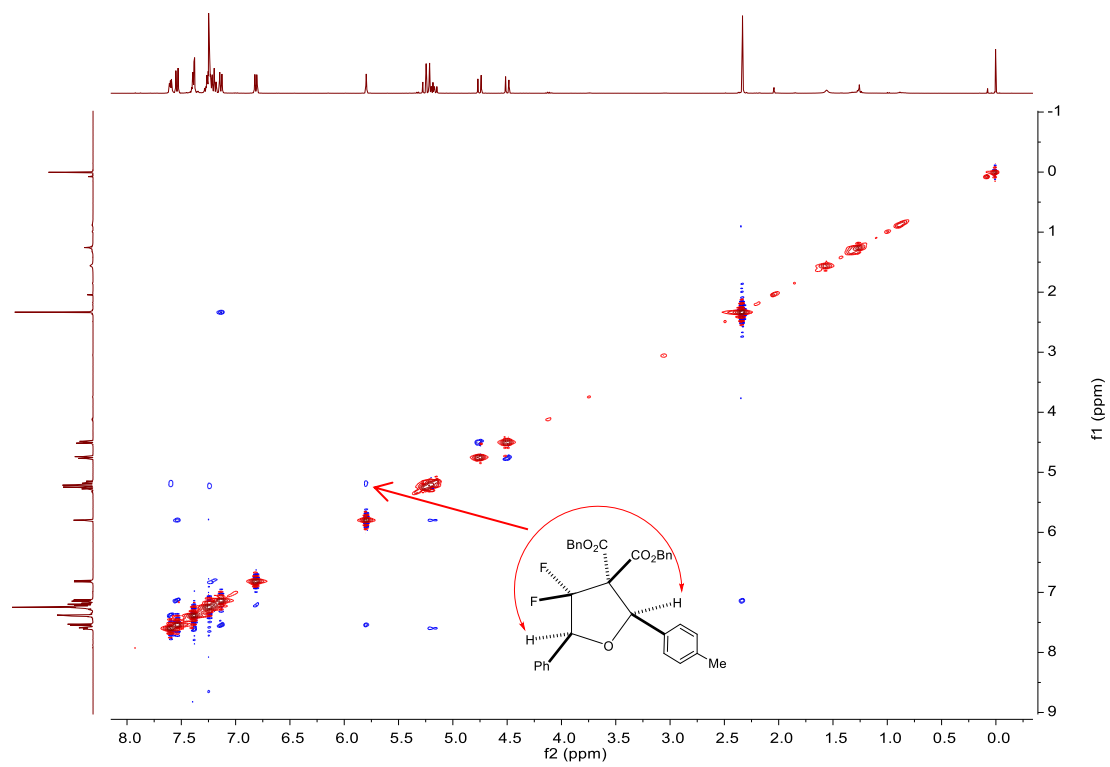

Supplement: d2sc00302c1.pdf [file d2sc00302c1.pdf]
